# Supplementary material for: Remarkably coherent population structure for a dominant Antarctic Chlorobium species
Source: Microbiome. 2021 Nov 26;9:231. doi: 10.1186/s40168-021-01173-z (PMC8620254; doi:10.1186/s40168-021-01173-z)
Supplement: Supplementary file 3 — Additional file 2. MIMAG data for Ca. Chlorobium antarcticum. Supplementary dataset. [file 40168_2021_1173_MOESM3_ESM.xlsx]

## Sheet: Summary
Additional file 2: Dataset S1 MIMAG data from AL, EF and TB.
	MIMAG: Minimum information about MAGs
	MIMAG data for AL, EF, TB

## Sheet: AL, EF, TB MIMAG data
Metagenome (sample collection date; depth; filter fraction]A	IMG Bin IDsB	Analysis project type	MAG quality																MAG metadata
			Bin quality	No. of genes recovered				16S recovery softwareC	tRNA extraction softwareD	Bin completeness (%)	Bin contamination (%)	Total assembly size (bp)	Number of contigs	Contig N50 (bp)	Contig L50	Maximum contig length (bp)	Completeness approach	Completeness software	Taxon ID method	Assembly software	Annotation method	Binning parameters	Binning software	Reassembly post binning
				5S rRNA	16S rRNA	23S rRNA	tRNA
Ace Lake
20/12/2006; 12.7 m; 3 μm*	3300028203_1	MAG	HQ	1	1	1	45	other	tRNAscan-SE	98	0.6	1799622	32	117130	5	386905	marker gene based	CheckM v1.0.12	multi marker approach; GTDB-tk v0.2.2	SPAdes v3.11.1	IMG Annotation Pipeline v4.16.2	tetranucleotide and abundance	MetaBAT v2.12.1	No
20/12/2006; 12.7 m; 0.8 μm*	3300028201_1	MAG	HQ	1	1	1	45	other	tRNAscan-SE	98	0.7	1846253	17	182278	3	651577	marker gene based	CheckM v1.0.12	multi marker approach; GTDB-tk v0.2.2	SPAdes v3.11.1	IMG Annotation Pipeline v4.16.2	tetranucleotide and abundance	MetaBAT v2.12.1	No
20/12/2006; 14 m; 0.8 μm	3300028302_2	MAG	HQ	1	1	1	47	other	tRNAscan-SE	95	1.1	1719822	58	45204	14	78658	marker gene based	CheckM v1.0.12	multi marker approach; GTDB-tk v0.2.2	SPAdes v3.11.1	IMG Annotation Pipeline v4.16.2	tetranucleotide and abundance	MetaBAT v2.12.1	No
20/12/2006; 18 m; 0.8 μm	3300028227_2	MAG	MQ	1	0	1	18	other	tRNAscan-SE	68	0.9	1219845	195	6953	60	29044	marker gene based	CheckM v1.0.12	multi marker approach; GTDB-tk v0.2.2	SPAdes v3.11.1	IMG Annotation Pipeline v4.16.2	tetranucleotide and abundance	MetaBAT v2.12.1	No
21/11/2008; 12.8 m; 3 μm*	3300025433_15	MAG	MQ	1	1	1	41	other	tRNAscan-SE	87	0.6	1561142	27	123777	5	197380	marker gene based	CheckM v1.0.11	multi marker approach; GTDB-tk v0.1.6	SPAdes v3.11.1	IMG Annotation Pipeline v4.16.2	tetranucleotide and abundance	MetaBAT v0.32.4	No
21/11/2008; 12.8 m; 0.8 μm*	3300025380_8	MAG	MQ	1	1	1	27	other	tRNAscan-SE	60	0	915115	13	123777	3	203377	marker gene based	CheckM v1.0.11	multi marker approach; GTDB-tk v0.1.6	SPAdes v3.11.1	IMG Annotation Pipeline v4.16.2	tetranucleotide and abundance	MetaBAT v0.32.4	No
21/11/2008; 12.8 m; 0.1 μm*	3300025362_8	MAG	MQ	1	1	1	36	other	tRNAscan-SE	66	0	1027280	10	178174	2	366511	marker gene based	CheckM v1.0.11	multi marker approach; GTDB-tk v0.1.6	SPAdes v3.11.1	IMG Annotation Pipeline v4.16.2	tetranucleotide and abundance	MetaBAT v0.32.4	No
21/11/2008; 14.1 m; 3 μm	3300025649_20	MAG	HQ	1	1	1	45	other	tRNAscan-SE	99	0.6	1717607	37	78845	8	182033	marker gene based	CheckM v1.0.11	multi marker approach; GTDB-tk v0.1.6	SPAdes v3.11.1	IMG Annotation Pipeline v4.16.2	tetranucleotide and abundance	MetaBAT v0.32.4	No
21/11/2008; 14.1 m; 0.8 μm	3300025628_24	MAG	MQ	0	0	0	35	other	tRNAscan-SE	72	0.6	1339744	21	198714	3	288328	marker gene based	CheckM v1.0.11	multi marker approach; GTDB-tk v0.1.6	SPAdes v3.11.1	IMG Annotation Pipeline v4.16.2	tetranucleotide and abundance	MetaBAT v0.32.4	No
21/11/2008; 14.1 m; 0.1 μm	3300025697_16	MAG	MQ	0	0	0	28	other	tRNAscan-SE	54	1.1	946925	184	5264	63	14724	marker gene based	CheckM v1.0.11	multi marker approach; GTDB-tk v0.1.6	SPAdes v3.11.1	IMG Annotation Pipeline v4.16.2	tetranucleotide and abundance	MetaBAT v0.32.4	No
21/11/2008; 18 m; 3 μm	3300025642_35	MAG	MQ	0	0	0	20	other	tRNAscan-SE	64	0	1147570	20	177355	3	216599	marker gene based	CheckM v1.0.11	multi marker approach; GTDB-tk v0.1.6	SPAdes v3.11.1	IMG Annotation Pipeline v4.16.2	tetranucleotide and abundance	MetaBAT v0.32.4	No
21/11/2008; 18 m; 0.8 μm	3300025586_24	MAG	HQ	1	1	1	44	other	tRNAscan-SE	99	0.6	1760585	23	178144	4	421713	marker gene based	CheckM v1.0.11	multi marker approach; GTDB-tk v0.1.6	SPAdes v3.11.1	IMG Annotation Pipeline v4.16.2	tetranucleotide and abundance	MetaBAT v0.32.4	No
21/11/2008; 18 m; 0.1 μm	3300025669_14	MAG	HQ	1	1	1	43	other	tRNAscan-SE	99	0.6	1772585	20	197447	3	545037	marker gene based	CheckM v1.0.11	multi marker approach; GTDB-tk v0.1.6	SPAdes v3.11.1	IMG Annotation Pipeline v4.16.2	tetranucleotide and abundance	MetaBAT v0.32.4	No
23/11/2008; 23 m; 3 μm	3300025698_17	MAG	HQ	1	1	1	44	other	tRNAscan-SE	99	0.6	1750727	22	196528	4	392026	marker gene based	CheckM v1.0.11	multi marker approach; GTDB-tk v0.1.6	SPAdes v3.11.1	IMG Annotation Pipeline v4.16.2	tetranucleotide and abundance	MetaBAT v0.32.4	No
23/11/2008; 23 m; 0.8 μm	3300025661_20	MAG	MQ	0	0	0	37	other	tRNAscan-SE	72	1.1	1347288	27	130492	4	211956	marker gene based	CheckM v1.0.11	multi marker approach; GTDB-tk v0.1.6	SPAdes v3.11.1	IMG Annotation Pipeline v4.16.2	tetranucleotide and abundance	MetaBAT v0.32.4	No
26/11/2013; 13.5 m; 3 μm*	3300022882_7	MAG	HQ	1	1	1	44	other	tRNAscan-SE	99	0.6	1780829	28	177353	4	331016	marker gene based	CheckM v1.0.11	multi marker approach; GTDB-tk v0.1.6	SPAdes v3.11.1	IMG Annotation Pipeline v4.16.0	tetranucleotide and abundance	MetaBAT v0.32.5	No
26/11/2013; 13.5 m; 0.8 μm*	3300023244_8	MAG	HQ	1	1	1	44	other	tRNAscan-SE	99	0.6	1784037	28	178460	5	275848	marker gene based	CheckM v1.0.11	multi marker approach; GTDB-tk v0.1.6	SPAdes v3.11.1	IMG Annotation Pipeline v4.16.0	tetranucleotide and abundance	MetaBAT v0.32.5	No
26/11/2013; 13.5 m; 0.1 μm*	3300022871_5	MAG	HQ	1	1	1	45	other	tRNAscan-SE	99	0.6	1792085	27	197866	3	636434	marker gene based	CheckM v1.0.11	multi marker approach; GTDB-tk v0.1.6	SPAdes v3.11.1	IMG Annotation Pipeline v4.16.0	tetranucleotide and abundance	MetaBAT v0.32.5	No
26/11/2013; 15 m; 3 μm	3300023234_7	MAG	HQ	1	1	1	44	other	tRNAscan-SE	97	0.7	1681376	109	21999	27	58533	marker gene based	CheckM v1.0.11	multi marker approach; GTDB-tk v0.1.6	SPAdes v3.11.1	IMG Annotation Pipeline v4.16.0	tetranucleotide and abundance	MetaBAT v0.32.5	No
26/11/2013; 15 m; 0.8 μm	3300022854_6	MAG	HQ	1	1	1	45	other	tRNAscan-SE	99	0.6	1793372	23	197448	3	636242	marker gene based	CheckM v1.0.11	multi marker approach; GTDB-tk v0.1.6	SPAdes v3.11.1	IMG Annotation Pipeline v4.16.0	tetranucleotide and abundance	MetaBAT v0.32.5	No
26/11/2013; 15 m; 0.1 μm	3300023435_5	MAG	HQ	1	1	1	45	other	tRNAscan-SE	99	0.6	1746873	27	119923	4	553678	marker gene based	CheckM v1.0.11	multi marker approach; GTDB-tk v0.1.6	SPAdes v3.11.1	IMG Annotation Pipeline v4.16.1	tetranucleotide and abundance	MetaBAT v0.32.5	No
26/11/2013; 19 m; 0.8 μm	3300023262_7	MAG	HQ	1	1	1	45	other	tRNAscan-SE	99	0.6	1741261	34	81316	8	200113	marker gene based	CheckM v1.0.11	multi marker approach; GTDB-tk v0.1.6	SPAdes v3.11.1	IMG Annotation Pipeline v4.16.0	tetranucleotide and abundance	MetaBAT v0.32.5	No
27/11/2013; 24 m; 0.8 μm	3300022887_7	MAG	HQ	1	1	1	44	other	tRNAscan-SE	97	2.6	1660438	141	14964	33	54574	marker gene based	CheckM v1.0.11	multi marker approach; GTDB-tk v0.1.6	SPAdes v3.11.1	IMG Annotation Pipeline v4.16.0	tetranucleotide and abundance	MetaBAT v0.32.5	No
27/11/2013; 24 m; 0.1 μm	3300031227_17	MAG	HQ	1	1	1	41	other	tRNAscan-SE	95	0.6	1650130	134	15637	33	59247	marker gene based	CheckM v1.0.12	multi marker approach; GTDB-tk v0.2.2	SPAdes v3.12.0	IMG Annotation Pipeline v4.16.5	tetranucleotide and abundance	MetaBAT v2.12.1	No
3/07/2014; 13.5 m; 3 μm*	3300022834_6	MAG	HQ	1	1	1	45	other	tRNAscan-SE	99	0.6	1745898	26	115130	5	270761	marker gene based	CheckM v1.0.11	multi marker approach; GTDB-tk v0.1.6	SPAdes v3.11.1	IMG Annotation Pipeline v4.16.0	tetranucleotide and abundance	MetaBAT v0.32.5	No
3/07/2014; 13.5 m; 0.8 μm*	3300023241_6	MAG	HQ	1	1	1	45	other	tRNAscan-SE	99	0.8	1784741	30	177353	4	389815	marker gene based	CheckM v1.0.11	multi marker approach; GTDB-tk v0.1.6	SPAdes v3.11.1	IMG Annotation Pipeline v4.16.0	tetranucleotide and abundance	MetaBAT v0.32.5	No
3/07/2014; 13.5 m; 0.1 μm*	3300023257_7	MAG	HQ	1	1	1	45	other	tRNAscan-SE	99	0.6	1789942	23	197550	3	636434	marker gene based	CheckM v1.0.11	multi marker approach; GTDB-tk v0.1.6	SPAdes v3.11.1	IMG Annotation Pipeline v4.16.0	tetranucleotide and abundance	MetaBAT v0.32.5	No
21/08/2014; 14.5 m; 3 μm*	3300022864_8	MAG	HQ	1	1	1	45	other	tRNAscan-SE	99	0.6	1748321	23	168676	5	233000	marker gene based	CheckM v1.0.11	multi marker approach; GTDB-tk v0.1.6	SPAdes v3.11.1	IMG Annotation Pipeline v4.16.0	tetranucleotide and abundance	MetaBAT v0.32.5	No
21/08/2014; 14.5 m; 0.8 μm*	3300024048_8	MAG	HQ	1	1	1	45	other	tRNAscan-SE	99	0.6	1784669	24	199758	3	636435	marker gene based	CheckM v1.0.11	multi marker approach; GTDB-tk v0.1.6	SPAdes v3.11.1	IMG Annotation Pipeline v4.16.1	tetranucleotide and abundance	MetaBAT v0.32.5	No
21/08/2014; 14.5 m; 0.1 μm*	3300022890_5	MAG	HQ	1	1	1	45	other	tRNAscan-SE	99	0.6	1753999	19	199106	3	636434	marker gene based	CheckM v1.0.11	multi marker approach; GTDB-tk v0.1.6	SPAdes v3.11.1	IMG Annotation Pipeline v4.16.0	tetranucleotide and abundance	MetaBAT v0.32.5	No
21/10/2014; 13 m; 0.8 μm*	3300022859_8	MAG	MQ	0	0	0	40	other	tRNAscan-SE	93	0.6	1620807	120	17268	29	73865	marker gene based	CheckM v1.0.11	multi marker approach; GTDB-tk v0.1.6	SPAdes v3.11.1	IMG Annotation Pipeline v4.16.0	tetranucleotide and abundance	MetaBAT v0.32.5	No
21/10/2014; 13 m; 0.1 μm*	3300022821_10	MAG	MQ	1	1	2	35	other	tRNAscan-SE	67	1.4	1219235	207	6405	68	23030	marker gene based	CheckM v1.0.11	multi marker approach; GTDB-tk v0.1.6	SPAdes v3.11.1	IMG Annotation Pipeline v4.16.0	tetranucleotide and abundance	MetaBAT v0.32.5	No
21/10/2014; 16 m; 0.8 μm	3300023249_8	MAG	HQ	1	1	1	44	other	tRNAscan-SE	99	0.6	1737575	52	76159	9	148423	marker gene based	CheckM v1.0.11	multi marker approach; GTDB-tk v0.1.6	SPAdes v3.11.1	IMG Annotation Pipeline v4.16.0	tetranucleotide and abundance	MetaBAT v0.32.5	No
21/10/2014; 19 m; 0.8 μm	3300022838_8	MAG	MQ	1	1	1	38	other	tRNAscan-SE	89	1.9	1431222	180	8998	52	32806	marker gene based	CheckM v1.0.11	multi marker approach; GTDB-tk v0.1.6	SPAdes v3.11.1	IMG Annotation Pipeline v4.16.0	tetranucleotide and abundance	MetaBAT v0.32.5	No
21/10/2014; 24 m; 0.8 μm	3300023295_7	MAG	MQ	1	0	1	28	other	tRNAscan-SE	61	0	1100512	200	5680	68	16947	marker gene based	CheckM v1.0.11	multi marker approach; GTDB-tk v0.1.6	SPAdes v3.11.1	IMG Annotation Pipeline v4.16.1	tetranucleotide and abundance	MetaBAT v0.32.5	No
4/12/2014; 12 m; 3 μm	3300023231_5	MAG	HQ	1	1	1	45	other	tRNAscan-SE	99	1.1	1783647	23	123452	5	331000	marker gene based	CheckM v1.0.11	multi marker approach; GTDB-tk v0.1.6	SPAdes v3.11.1	IMG Annotation Pipeline v4.16.0	tetranucleotide and abundance	MetaBAT v0.32.5	No
4/12/2014; 12 m; 0.8 μm	3300023227_6	MAG	HQ	1	1	1	45	other	tRNAscan-SE	99	0.6	1783085	26	176506	4	403971	marker gene based	CheckM v1.0.11	multi marker approach; GTDB-tk v0.1.6	SPAdes v3.11.1	IMG Annotation Pipeline v4.16.0	tetranucleotide and abundance	MetaBAT v0.32.5	No
4/12/2014; 12 m; 0.1 μm	3300022851_4	MAG	HQ	1	1	1	45	other	tRNAscan-SE	99	0.6	1796868	19	177357	5	267214	marker gene based	CheckM v1.0.11	multi marker approach; GTDB-tk v0.1.6	SPAdes v3.11.1	IMG Annotation Pipeline v4.16.0	tetranucleotide and abundance	MetaBAT v0.32.5	No
4/12/2014; 13.4 m; 3 μm*	3300031697_14	MAG	HQ	1	1	1	45	other	tRNAscan-SE	99	0.6	1807042	33	150058	5	211781	marker gene based	CheckM v1.0.12	multi marker approach; GTDB-tk v0.2.2	SPAdes v3.12.0	IMG Annotation Pipeline v4.16.5	tetranucleotide and abundance	MetaBAT v2.12.1	No
4/12/2014; 13.4 m; 0.8 μm*	3300022826_4	MAG	HQ	1	1	1	45	other	tRNAscan-SE	99	0.6	1801610	31	123328	5	312572	marker gene based	CheckM v1.0.11	multi marker approach; GTDB-tk v0.1.6	SPAdes v3.11.1	IMG Annotation Pipeline v4.16.0	tetranucleotide and abundance	MetaBAT v0.32.5	No
4/12/2014; 13.4 m; 0.1 μm*	3300023292_2	MAG	HQ	1	1	1	45	other	tRNAscan-SE	99	0.6	1785555	28	177353	4	421715	marker gene based	CheckM v1.0.11	multi marker approach; GTDB-tk v0.1.6	SPAdes v3.11.1	IMG Annotation Pipeline v4.16.1	tetranucleotide and abundance	MetaBAT v0.32.5	No
4/12/2014; 14 m; 3 μm	3300023253_8	MAG	HQ	1	1	1	45	other	tRNAscan-SE	99	0.6	1797888	22	198029	3	545039	marker gene based	CheckM v1.0.11	multi marker approach; GTDB-tk v0.1.6	SPAdes v3.11.1	IMG Annotation Pipeline v4.16.0	tetranucleotide and abundance	MetaBAT v0.32.5	No
4/12/2014; 14 m; 0.8 μm	3300023233_7	MAG	HQ	1	1	1	45	other	tRNAscan-SE	99	0.6	1811803	24	197609	3	544845	marker gene based	CheckM v1.0.11	multi marker approach; GTDB-tk v0.1.6	SPAdes v3.11.1	IMG Annotation Pipeline v4.16.0	tetranucleotide and abundance	MetaBAT v0.32.5	No
4/12/2014; 14 m; 0.1 μm	3300022868_7	MAG	HQ	1	1	1	45	other	tRNAscan-SE	99	0.6	1777496	26	197400	4	301096	marker gene based	CheckM v1.0.11	multi marker approach; GTDB-tk v0.1.6	SPAdes v3.11.1	IMG Annotation Pipeline v4.16.0	tetranucleotide and abundance	MetaBAT v0.32.5	No
3/12/2014; 19 m; 3 μm	3300022860_8	MAG	HQ	1	1	1	45	other	tRNAscan-SE	98	1.1	1773797	22	177353	3	545037	marker gene based	CheckM v1.0.11	multi marker approach; GTDB-tk v0.1.6	SPAdes v3.11.1	IMG Annotation Pipeline v4.16.0	tetranucleotide and abundance	MetaBAT v0.32.5	No
3/12/2014; 19 m; 0.8 μm	3300022846_6	MAG	HQ	1	1	1	45	other	tRNAscan-SE	99	0.6	1797570	29	181850	5	236088	marker gene based	CheckM v1.0.11	multi marker approach; GTDB-tk v0.1.6	SPAdes v3.11.1	IMG Annotation Pipeline v4.16.0	tetranucleotide and abundance	MetaBAT v0.32.5	No
3/12/2014; 19 m; 0.1 μm†	3300023061_2	MAG	HQ	1	1	1	46	other	tRNAscan-SE	99	0.6	1812610	27	177725	5	276836	marker gene based	CheckM v1.0.11	multi marker approach; GTDB-tk v0.1.6	SPAdes v3.11.1	IMG Annotation Pipeline v4.16.1	tetranucleotide and abundance	MetaBAT v0.32.5	No
3/12/2014; 24 m; 3 μm	3300022884_9	MAG	HQ	1	1	1	45	other	tRNAscan-SE	99	0.9	1735816	69	34410	13	151721	marker gene based	CheckM v1.0.11	multi marker approach; GTDB-tk v0.1.6	SPAdes v3.11.1	IMG Annotation Pipeline v4.16.0	tetranucleotide and abundance	MetaBAT v0.32.5	No
3/12/2014; 24 m; 0.8 μm	3300023299_6	MAG	HQ	1	1	1	45	other	tRNAscan-SE	99	0.6	1795237	22	199446	4	312575	marker gene based	CheckM v1.0.11	multi marker approach; GTDB-tk v0.1.6	SPAdes v3.11.1	IMG Annotation Pipeline v4.16.1	tetranucleotide and abundance	MetaBAT v0.32.5	No
3/12/2014; 24 m; 0.1 μm	3300023256_3	MAG	HQ	1	1	1	45	other	tRNAscan-SE	99	0.6	1797328	22	220575	3	454024	marker gene based	CheckM v1.0.11	multi marker approach; GTDB-tk v0.1.6	SPAdes v3.11.1	IMG Annotation Pipeline v4.16.0	tetranucleotide and abundance	MetaBAT v0.32.5	No
Ellis Fjord
9/10/2014; 5 m; 0.1 μm	3300031659_20	MAG	MQ	0	0	0	20	other	tRNAscan-SE	63	0	890084	170	5593	57	17985	marker gene based	CheckM v1.0.12	multi marker approach; GTDB-tk v0.2.2	SPAdes v3.12.0	IMG Annotation Pipeline v4.16.5	tetranucleotide and abundance	MetaBAT v2.12.1	No
9/10/2014; 45 m; 3 μm*†	3300031631_9	MAG	HQ	1	1	1	45	other	tRNAscan-SE	99	0.6	1836564	32	159945	5	271782	marker gene based	CheckM v1.0.12	multi marker approach; GTDB-tk v0.2.2	SPAdes v3.12.0	IMG Annotation Pipeline v4.16.5	tetranucleotide and abundance	MetaBAT v2.12.1	No
9/10/2014; 45 m; 0.8 μm*	3300031741_10	MAG	HQ	1	1	1	45	other	tRNAscan-SE	99	0.6	1820609	31	162002	5	271782	marker gene based	CheckM v1.0.12	multi marker approach; GTDB-tk v0.2.2	SPAdes v3.12.0	IMG Annotation Pipeline v4.16.5	tetranucleotide and abundance	MetaBAT v2.12.1	No
9/10/2014; 45 m; 0.1 μm*	3300031603_6	MAG	HQ	1	1	1	45	other	tRNAscan-SE	99	0.6	1820941	33	86406	6	271782	marker gene based	CheckM v1.0.12	multi marker approach; GTDB-tk v0.2.2	SPAdes v3.12.0	IMG Annotation Pipeline v4.16.5	tetranucleotide and abundance	MetaBAT v2.12.1	No
8/10/2014; 60 m; 3 μm	3300031645_24	MAG	MQ	1	1	1	35	other	tRNAscan-SE	89	1.6	1450081	187	8810	52	33521	marker gene based	CheckM v1.0.12	multi marker approach; GTDB-tk v0.2.2	SPAdes v3.12.0	IMG Annotation Pipeline v4.16.5	tetranucleotide and abundance	MetaBAT v2.12.1	No
8/10/2014; 60 m; 0.8 μm	3300031657_13	MAG	HQ	1	1	1	45	other	tRNAscan-SE	99	0.6	1753701	34	100817	7	183441	marker gene based	CheckM v1.0.12	multi marker approach; GTDB-tk v0.2.2	SPAdes v3.12.0	IMG Annotation Pipeline v4.16.5	tetranucleotide and abundance	MetaBAT v2.12.1	No
8/10/2014; 60 m; 0.1 μm	3300031601_7	MAG	HQ	1	1	1	45	other	tRNAscan-SE	99	1.1	1770724	46	59680	10	131703	marker gene based	CheckM v1.0.12	multi marker approach; GTDB-tk v0.2.2	SPAdes v3.12.0	IMG Annotation Pipeline v4.16.5	tetranucleotide and abundance	MetaBAT v2.12.1	No
Taynaya Bay
28/11/2014; 5 m; 0.22 μm	3300038912_10	MAG	HQ	1	1	1	46	other	tRNAscan-SE	99	2	1808383	57	44738	13	171371	marker gene based	CheckM v1.0.12	multi marker approach; GTDB-tk v0.2.2	SPAdes v3.13.0	IMG Annotation Pipeline v5.0.15	tetranucleotide and abundance	MetaBAT v2.12.1	No
28/11/2014; 11 m; 0.22 μm*	3300039187_7	MAG	HQ	1	1	1	46	other	tRNAscan-SE	99	0.8	1822415	24	139954	5	220290	marker gene based	CheckM v1.0.12	multi marker approach; GTDB-tk v0.2.2	SPAdes v3.13.0	IMG Annotation Pipeline v5.0.15	tetranucleotide and abundance	MetaBAT v2.12.1	No
A The metagenomes are arranged from top to bottom in chronological order of sample collection (2006 to 2014), followed by depth (surface to bottom waters) and filter fraction (3, 0.8, 0.1 and 0.22 μm). * Metagenomes from the oxic-anoxic interface. † MAGs from AL (AL_ref MAG) and EF (EF_ref MAG) were used for FR analyses. Filter fractions: 3, 3–20 μm; 0.8, 0.8–3 μm; 0.1, 0.1–0.8 μm; 0.22, 0.22–20 …
B The numbers prior to the underscore symbol in the IMG Bin ID denotes the IMG Genome ID of the metagenome from which the MAG bin was generated.
C Other: IMG Annotation Pipeline — utilises an in-house curated set of ribosomal RNA hidden Markov models.
D tRNAscan-SE was implemented within the IMG Annotation Pipeline.
HQ, high quality; MQ, medium quality;
