# Supplementary material for: Remarkably coherent population structure for a dominant Antarctic Chlorobium species
Source: Microbiome. 2021 Nov 26;9:231. doi: 10.1186/s40168-021-01173-z (PMC8620254; doi:10.1186/s40168-021-01173-z)
Supplement: Supplementary file 4 — Additional file 3. Data from Ca. Chlorobium antarcticum 16S rRNA gene variation analysis and comparative analysis of AL, EF and TB MAGs and Cpv-DSM265 genome. Supplementary dataset. [file 40168_2021_1173_MOESM4_ESM.xlsx]

## Sheet: Summary
Additional file 3: Dataset S2 Ca. Chlorobium antarticum 16S rRNA gene variation, MAG composition and functional potential.
	Alignment of AL_ref MAG to other AL, EF and TB MAGs.
	Alignment of the Ca. Chlorobium antarticum 16S rRNA gene to AL, EF and TB metagenome reads.
	Differences in the functional potential between AL_ref MAG and Cpv-DSM265.
	AL_ref MAG vs AL, EF, TB MAGs
	Chlorobium 16S rRNA FR
	AL_ref MAG genes
	Cpv-DSM265 genes

## Sheet: AL_ref MAG vs AL, EF, TB MAGs
Location (Season)A	Metagenome (Sample collection date; depth; filter fraction)B	IMG Bin ID of MAGC	Total contigs in MAG	Contig alignment identity	MAG contigs that did not align to AL_ref MAGD		AL_ref MAG contigs that did not align to the MAGE
					Number of unaligned contigs	Contig (gene count): gene functions	Number of unaligned contigs	A4 (3,767 bp; protease secretion)	A6 (4,138 bp; General function, hypothetical, post-translational modification, tRNA)	A7 (6,459 bp; General function, hypothetical, mobile element)	A12 (8,847 bp; Hypothetical, transport, cell wall modification, transcription regulation)	A13 (13,766; Transport, cell defence, other metabolic)	A14 (16,990; General function, hypothetical, transport, cobalamin biosynthesis, other metabolic)	A15 (10,955 bp; Hypothetical, transport, post-translational modification, cobinamide salvaging, other metabolic)	A16 (3,206 bp; General function, hypothetical, other metabolic)	A17 (11,418 bp; Cobalamin biosynthesis, transport)	A22 (7,608 bp; Hypothetical, mobile elements, transcription regulation, post-translational modification)	A25 (9,737 bp; General function, hypothetical, transport, trasncritpion regulation, other metabolic)
AL (Spring)	21/11/2008; 14.1 m; 3 μm	3300025649_20	37	≥99.7	0		7	+		+			+	+	+	+	+
	21/11/2008; 18 m; 0.8 μm	3300025586_24	23	≥99.9	0		4	+	+	+							+
	21/11/2008; 18 m; 0.1 μm	3300025669_14	20	≥99.7	0		4	+	+	+								+
	23/11/2008; 23 m; 3 μm	3300025698_17	22	≥99.3	0		6		+	+	+		+	+			+
	26/11/2013; 13.5 m; 3 μm*	3300022882_7	28	≥99.8	1	Ga0222626_1004362 (5): dehydrogenase; four hypothetical	3	+	+	+
	26/11/2013; 13.5 m; 0.8 μm*	3300023244_8	28	≥99.8	1	Ga0222627_1003471 (4): putative DNA methylase; DarT toxin; O-acetyl-ADP-ribose deacetylase; SNF2 family DNA or RNA helicase	2		+	+
	26/11/2013; 13.5 m; 0.1 μm*	3300022871_5	27	≥99	2	Ga0222628_1004021 (5): hypothetical; glycosyltransferase; three transposases Ga0222628_1004314 (8): S-adenosylmethionine:tRNA ribosyltransferase-isomerase; carbonic anhydrase; putative acetyltransferase; two BrnA antitoxin; three hypothetical	2	+		+
	26/11/2013; 15 m; 0.8 μm	3300022854_6	23	≥99	1	Ga0222636_1004422 (3): putative cardiolipin synthase; quinol monooxygenase; transcriptional regulator	2	+		+
	26/11/2013; 15 m; 0.1 μm	3300023435_5	27	≥99.8	0		6	+		+			+	+	+	+
	26/11/2013; 19 m; 0.8 μm	3300023262_7	34	>99 (one ~5kb alignment 96)	0		6	+		+	+		+	+	+
AL (Winter)	3/07/2014; 13.5 m; 3 μm*	3300022834_6	26	≥99.7	0		6			+			+	+	+	+		+
	3/07/2014; 13.5 m; 0.8 μm*	3300023241_6	30	>99	5	Ga0222657_1001583 (6): DUF4365; DNA or RNA helicase; predicted transcriptional regulator; hypothetical; serine/threonine protein kinase/pSer/pThr/pTyr-binding forkhead associated (FHA) protein; predicted AAA+ superfamily ATPase Ga0222657_1003329 (3): hypothetical; HSP90 family molecular chaperone; endonuclease Ga0222657_1003443 (2): cysteine desulfurase; S-DNA-T family DNA segregation ATPase FtsK…	5	+		+			+		+			+
	3/07/2014; 13.5 m; 0.1 μm*	3300023257_7	23	≥99	0		1											+
	21/08/2014; 14.5 m; 3 μm*	3300022864_8	23	≥99.8	0		6	+		+			+	+	+	+
	21/08/2014; 14.5 m; 0.8 μm*	3300024048_8	24	≥99.8	0		2	+		+
	21/08/2014; 14.5 m; 0.1 μm*	3300022890_5	19	≥99.4	0		6	+		+			+	+	+			+
AL (Spring)	21/10/2014; 16 m; 0.8 μm	3300023249_8	52	≥99.9	0		5		+	+			+	+	+
AL (Summer)	4/12/2014; 12 m; 3 μm	3300023231_5	23	≥99.3	0		3	+		+							+
	4/12/2014; 12 m; 0.8 μm	3300023227_6	26	≥99.8	0		2	+		+
	4/12/2014; 12 m; 0.1 μm	3300022851_4	19	≥99.4	0		2	+			+
	4/12/2014; 13.4 m; 3 μm*	3300031697_14	33	≥99.6	0		2			+							+
	4/12/2014; 13.4 m; 0.8 μm*	3300022826_4	31		0		1			+
	4/12/2014; 13.4 m; 0.1 μm*	3300023292_2	28	≥99.9	0		1			+
	4/12/2014; 14 m; 3 μm	3300023253_8	22	≥99.3	1	Ga0222695_1005921 (4): DUF4043; three hypothetical	3			+		+						+
	4/12/2014; 14 m; 0.8 μm	3300023233_7	24	≥99.7	0		1	+
	4/12/2014; 14 m; 0.1 μm	3300022868_7	26	≥99.8	0		2			+								+
	3/12/2014; 19 m; 0.8 μm	3300022846_6	29	≥99.8	1	Ga0222699_1004539 (4): putative DNA methylase; DarT toxin; O-acetyl-ADP-ribose deacetylase; SNF2 family DNA or RNA helicase	2	+		+
	3/12/2014; 24 m; 3 μm	3300022884_9	69	>98	2	Ga0222701_1001984 (3): hypothetical; uncharacterized protein YhaN; site-specific DNA-methyltransferase Ga0222701_1003728 (5): hydrogenase nickel incorporation protein HypB; four hypothetical	4			+			+	+	+
	3/12/2014; 24 m; 0.8 μm	3300023299_6	22	≥99.5	1	Ga0222702_1005402 (2): transposase; predicted dehydrogenase	3	+		+								+
	3/12/2014; 24 m; 0.1 μm	3300023256_3	22	≥99.3	0		2	+		+
EF (Spring)	9/10/2014; 45 m; 3 μm*†	3300031631_9	32	≥99.5	5	Ga0307987_1001683 (7): Tol biopolymer transport system component; heparinase II/III-like protein; alpha-L-fucosidase; four hypothetical Ga0307987_1004356 (7): UDP-N-acetyl-D-mannosaminuronic acid dehydrogenase; predicted dehydrogenase; uncharacterized heparinase superfamily protein; four hypothetical Ga0307987_1008940 (3): three hypothetical Ga0307987_1012998 (3): FAD/FMN-containing dehydrogenase…	0
	9/10/2014; 45 m; 0.8 μm*	3300031741_10	31	≥99	2	Ga0307988_1005378 (6): predicted dehydrogenase; uncharacterized heparinase superfamily protein; four hypothetical Ga0307988_1010855 (4): hypothetical; three transposases	0
	9/10/2014; 45 m; 0.1 μm*	3300031603_6	33	≥99.5 (one ~5kb alignment 96)	1	Ga0307989_1004464 (6): predicted dehydrogenase; uncharacterized heparinase superfamily protein; four hypothetical	1				+
	8/10/2014; 60 m; 0.8 μm	3300031657_13	34	>99 (one ~2kb alignment 92)	1	Ga0307991_1018772 (2): PglZ domain-containing protein; hypothetical	7		+		+		+	+	+	+		+
	8/10/2014; 60 m; 0.1 μm	3300031601_7	46	>99 (one ~5kb alignment 96)	1	Ga0307992_1017955 (4): DUF4043; three hypothetical	5				+		+	+	+	+
TB (Spring)	28/11/2014; 5 m; 0.22 μm	3300038912_10	57	≥99	0		2	+										+
	28/11/2014; 11 m; 0.22 μm*	3300039187_7	24	≥99	0		1	+
A The metagenome samples were collected from Ace Lake (AL) in summer, winter and spring, and from Ellis Fjord (EF) and Taynaya Bay (TB).
B The metagenomes are arranged from top to bottom in chronological order of sample collection (2008 to 2014), followed by depth (surface to bottom waters) and filter fraction (3, 0.8, 0.1 and 0.22 μm). * Metagenomes from the oxic-anoxic interface. † EF_ref MAG used for FR analysis. Filter fractions: 3, 3–20 μm; 0.8, 0.8–3 μm; 0.1, 0.1–0.8 μm; 0.22, 0.22–20 μm.
C The numbers prior to the underscore symbol in the IMG Bin ID denotes the IMG Genome ID of the metagenome from which the MAG bin was generated. Only high-quality MAGs with ≥99% genome completion are shown. For detailed descriptions of MAGs see Additional file 1: Table S2 and Additional file 2: Dataset S1.
D Some MAG contigs did not align, had lower identity matches (<80%) or short sequence matches (<1 kb) to the AL_ref MAG. The IMG scaffold IDs (Contig), number of genes (gene count) and autoannotated genes (gene functions) on these MAG contigs are shown.
E Some AL_ref MAG contigs did not align, had lower identity matches (<80%) or short sequence matches (<1 kb) to the MAG contigs. The '+' symbol in a cell indicates that the AL_ref MAG contig in the corresponding column did not align with the MAG in the corresponding row. The red-highlighetd AL_ref MAG contigs were identified in the LCRs of Ca. Chlorobium antarcticum (Fig. 4; Additional file 1: Ta…

## Sheet: Chlorobium 16S rRNA FR
Ca. Chlorobium antarcticum 16S rRNA gene read depth analysis
MetagenomesA	Dec 2006	Nov 2008	Nov 2013	Jul 2014	Aug 2014	Oct 2014	Dec 2014	EF 45 m	TB 11 m
Mean read depth of geneB	82.4252	11334.8	1401.97	225.422	205.692	31.3854	5191.73	11147.6	274.172
Total SNPs with relative coverage ≥1%C	81	0	0	18	22	42	1	2	37
Mean of SNP read depthsC	1.14988	NA	NA	2.88039	2.33741	1.06112	155.752	278.691	5.40934
Mean of % relative coverage of SNPsD	1	NA	NA	1.27778	1.13636	3.38095	3	2.5	1.97297
Ca. Chlorobium antarticum population at oxic-anoxic interface (%)D	99	≥99	≥99	99	99	97	97	97	98
	% Relative coverage of SNPsC
Position on 16S rRNA gene	Dec 2006	Nov 2008	Nov 2013	Jul 2014	Aug 2014	Oct 2014	Dec 2014	EF 45 m	TB 11 m
26						3
31						3
61	2
64	1
65	1
66	4
67	2
70	2
98						4
114				1
148									3
155						3
159									5
160					1
188					1
205						3
213									1
217						3
226				2
227									1
240				1
270						3
312						3			3
322									1
329									1
341	1
344	1
352						3
356									4
360							3	4
362									3
371								1
375									1
380									1
381						11
386						4
406						4
430	1
432	1
446									1
454	1
455					1
456	1
494					2
514									2
515					1
538	1
546				2
551	1
553					1
557					1
560				1
561				2
570				2
574				1
575					1
585	2
586	2				1
587	2
588	1
593	1
598	1
600					1
624				1
638					1
648	1			1
658					1
661	1
663	2
668	1
670	1
672	1								1
673	1
674	1
683				1
686						4
688	1
695	1			1
701						4
708									1
711						4
712	1
714	1					4
715	1
721						4
723				1
727						4
730					1
741	1
746					1
749									2
752					2
755						4
759					1
768									2
771	1
772	4
779	2
782				1
784				1
795				2
815					1
848				1
881						3
883						3
888						3			1
890									1
896	1
897	1
900	1
902	1
903						3
905									1
907									1
912	1
913	4
916	3
917	1
931									8
941	1					3
949									3
952									1
965					1
970									3
979									1
999	1
1001	1
1006	1
1014	1
1015	1
1018	6					4
1019	4
1038									1
1080	1
1081	1
1082	1
1083	1
1087									2
1095						2
1100									2
1101									1
1102									2
1103									1
1123									1
1134	2
1154					1
1170						3
1215						3
1222					1
1230						3
1236					2
1256	1
1257	1
1258	1
1259	1
1260	1
1261	1
1262	1
1263	1
1264									7
1266	3
1267	1
1269	1								1
1270	1
1271	3
1272	1
1273	1
1318	1
1322						2
1331						7
1341					1
1344									1
1349						2
1355	1
1356						2
1367	1					2
1369	1
1378				1
1385						2
1390						3
1391						2
1394						3
1415	1
1416	1					3
1433						3
1442						3
1446						3
1451	1
1457									1
1486	1
A The reads from merged metagenomes from AL and EF and a TB metagenome were aligned to the 16S rRNA gene of Ca. Chlorobium antarcticum (see the “Methods” section).
B The mean read depth of Ca. Chlorobium antarcticum 16S rRNA gene in a metagenome was calculated by averaging the read depths of all bases in the gene (see the “Methods” section).
C For this analysis, SNPs with variant frequency ≥0.01 (i.e., at least 1% of the reads aligned at the position containing the SNP) were considered. The mean of SNP read depths was calculated by averaging the read depths of the SNPs identified in each metagenome. The % relative coverage of each SNP was calculated by dividing its read depth with the mean read depth of the 16S rRNA gene in each meta…
D Mean of % relative coverage of SNPs were calculated by averaging the % relative coverage of all SNPs identified in a metagenome. These percentages roughly indicate a potential Chlorobium population other than Ca. Chlorobium antarticum. The approximate % of Ca. Chlorobium antarticum population at the oxic-anoxic interface of AL, EF and TB are highlighted with a green background.
NA, not applicable.

## Sheet: AL_ref MAG genes
AL_ref MAG contig numberA	AL_ref MAG contig ID	AL_ref MAG gene ID	Start	End	IMG-annotated gene functionB	Matches to Cpv-DSM265C	Overall function of "No match" genes
A1	Ga0222700_1000010	Ga0222700_10000101	825	1	hypothetical protein	No match	Hypothetical
A1	Ga0222700_1000010	Ga0222700_10000102	1736	837	restriction system protein	No match	Cell defence
A1	Ga0222700_1000010	Ga0222700_10000103	2257	2748	PH (Pleckstrin Homology) domain-containing protein	No match	Cell signaling
A1	Ga0222700_1000010	Ga0222700_10000104	2769	5561	PD-(D/E)XK nuclease superfamily protein	No match	DNA recombination and repair
A1	Ga0222700_1000010	Ga0222700_10000105	5554	8751	ATP-dependent exoDNAse (exonuclease V) beta subunit/superfamily I DNA/RNA helicase	No match	DNA recombination and repair
A1	Ga0222700_1000010	Ga0222700_10000106	8903	9466	hypothetical protein	No match	Hypothetical
A1	Ga0222700_1000010	Ga0222700_10000107	9996	9571	hypothetical protein	No match	Hypothetical
A1	Ga0222700_1000010	Ga0222700_10000108	10561	10394	hypothetical protein	No match	Hypothetical
A1	Ga0222700_1000010	Ga0222700_10000109	11403	11260	hypothetical protein	No match	Hypothetical
A1	Ga0222700_1000010	Ga0222700_100001010	11521	11396	uncharacterized protein (DUF4415 family)	No match	Cell defence
A1	Ga0222700_1000010	Ga0222700_100001011	11829	12128	hypothetical protein	No match	Hypothetical
A1	Ga0222700_1000010	Ga0222700_100001012	12503	12312	hypothetical protein	No match	Hypothetical
A1	Ga0222700_1000010	Ga0222700_100001013	13123	12542	hypothetical protein	Match
A1	Ga0222700_1000010	Ga0222700_100001014	13602	13228	hypothetical protein	No match	Hypothetical
A1	Ga0222700_1000010	Ga0222700_100001015	13943	13623	5'(3')-deoxyribonucleotidase	No match	Other metabolism
A1	Ga0222700_1000010	Ga0222700_100001016	14075	13980	hypothetical protein	No match	Hypothetical
A1	Ga0222700_1000010	Ga0222700_100001017	16408	14213	transcriptional regulator with GAF, ATPase, and Fis domain/GAF domain-containing protein	Partial match
A1	Ga0222700_1000010	Ga0222700_100001018	16485	17849	outer membrane protein	Match
A1	Ga0222700_1000010	Ga0222700_100001019	17846	18313	nucleotide-binding universal stress UspA family protein	Match
A1	Ga0222700_1000010	Ga0222700_100001020	18320	19279	membrane fusion protein (multidrug efflux system)	Match
A1	Ga0222700_1000010	Ga0222700_100001021	19291	20889	DHA2 family multidrug resistance protein	Match
A1	Ga0222700_1000010	Ga0222700_100001022	22282	20999	MFS family permease/MFS family permease	Match
A1	Ga0222700_1000010	Ga0222700_100001023	22970	22269	uridine kinase	Match
A1	Ga0222700_1000010	Ga0222700_100001024	24709	23333	uroporphyrinogen III methyltransferase/synthase	Match
A1	Ga0222700_1000010	Ga0222700_100001025	25188	24721	precorrin-2 dehydrogenase/sirohydrochlorin ferrochelatase	Match
A1	Ga0222700_1000010	Ga0222700_100001026	26330	25185	molybdopterin-containing oxidoreductase family membrane subunit	Match
A1	Ga0222700_1000010	Ga0222700_100001027	27098	26340	molybdopterin-containing oxidoreductase family iron-sulfur binding subunit	Match
A1	Ga0222700_1000010	Ga0222700_100001028	27472	27095	hypothetical protein	Match
A1	Ga0222700_1000010	Ga0222700_100001029	29114	27465	Fe-S oxidoreductase	Match
A1	Ga0222700_1000010	Ga0222700_100001030	30112	29117	nitrate reductase gamma subunit	Match
A1	Ga0222700_1000010	Ga0222700_100001031	30555	30109	hypothetical protein	Match
A1	Ga0222700_1000010	Ga0222700_100001032	30861	30568	tRNA 2-thiouridine synthesizing protein B	Match
A1	Ga0222700_1000010	Ga0222700_100001033	31270	30902	tRNA 2-thiouridine synthesizing protein C	Match
A1	Ga0222700_1000010	Ga0222700_100001034	31689	31276	tRNA 2-thiouridine synthesizing protein D	Match
A1	Ga0222700_1000010	Ga0222700_100001035	32048	31686	hypothetical protein	Match
A1	Ga0222700_1000010	Ga0222700_100001036	33821	32085	NADPH-dependent glutamate synthase beta subunit-like oxidoreductase/Fe-S-cluster-containing hydrogenase component 2/uncharacterized protein with NAD-binding domain and iron-sulfur cluster	Match
A1	Ga0222700_1000010	Ga0222700_100001037	34915	33836	sulfite reductase beta subunit	Match
A1	Ga0222700_1000010	Ga0222700_100001038	36225	34972	sulfite reductase alpha subunit	Match
A1	Ga0222700_1000010	Ga0222700_100001039	36666	36283	tRNA 2-thiouridine synthesizing protein E	Match
A1	Ga0222700_1000010	Ga0222700_100001040	38155	36749	cobyrinic acid a,c-diamide synthase	Match
A1	Ga0222700_1000010	Ga0222700_100001041	38413	38177	tRNA 2-thiouridine synthesizing protein A	Match
A1	Ga0222700_1000010	Ga0222700_100001042	38938	38450	rhodanese-related sulfurtransferase	Match
A1	Ga0222700_1000010	Ga0222700_100001043	39447	38938	peroxiredoxin family protein	Match
A1	Ga0222700_1000010	Ga0222700_100001044	40038	39610	hypothetical protein	Match
A1	Ga0222700_1000010	Ga0222700_100001045	41003	40035	hypothetical protein	Match
A1	Ga0222700_1000010	Ga0222700_100001046	43872	41005	anaerobic selenocysteine-containing dehydrogenase	Match
A1	Ga0222700_1000010	Ga0222700_100001047	45525	43894	Fe-S-cluster-containing dehydrogenase component/formate-dependent nitrite reductase membrane component NrfD	Match
A1	Ga0222700_1000010	Ga0222700_100001048	45730	45936	hypothetical protein	Match
A1	Ga0222700_1000010	Ga0222700_100001049	47408	46050	long-chain fatty acid transport protein	No match	Transport
A1	Ga0222700_1000010	Ga0222700_100001050	49456	47591	phosphoenolpyruvate carboxykinase (GTP)	Match
A1	Ga0222700_1000010	Ga0222700_100001051	50078	49557	thiol-disulfide isomerase/thioredoxin	Match
A1	Ga0222700_1000010	Ga0222700_100001052	50255	50327	tRNA_Thr_CGT	Match
A1	Ga0222700_1000010	Ga0222700_100001053	50421	51809	F-type H+-transporting ATPase subunit beta	Match
A1	Ga0222700_1000010	Ga0222700_100001054	51824	52090	F-type H+-transporting ATPase subunit epsilon	Match
A1	Ga0222700_1000010	Ga0222700_100001055	52155	53117	muramoyltetrapeptide carboxypeptidase	Partial match
A1	Ga0222700_1000010	Ga0222700_100001056	53207	53521	ATP-dependent Clp protease adapter protein ClpS	Match
A1	Ga0222700_1000010	Ga0222700_100001057	53623	55092	glycyl-tRNA synthetase	Match
A1	Ga0222700_1000010	Ga0222700_100001058	55135	56277	geranylgeranyl reductase	Match
A1	Ga0222700_1000010	Ga0222700_100001059	56278	56958	uncharacterized protein DUF3593/uncharacterized protein DUF2499	Match
A1	Ga0222700_1000010	Ga0222700_100001060	58644	56965	carboxyl-terminal processing protease	Match
A1	Ga0222700_1000010	Ga0222700_100001061	59542	58679	2,3,4,5-tetrahydropyridine-2-carboxylate N-succinyltransferase	Match
A1	Ga0222700_1000010	Ga0222700_100001062	61248	59563	ribonuclease G	Match
A1	Ga0222700_1000010	Ga0222700_100001063	61280	62080	ribonuclease HII	Partial match
A1	Ga0222700_1000010	Ga0222700_100001064	62077	62472	putative endonuclease	Match
A1	Ga0222700_1000010	Ga0222700_100001065	62550	64478	DNA gyrase subunit B	Match
A1	Ga0222700_1000010	Ga0222700_100001066	65798	64467	peptidyl-prolyl cis-trans isomerase SurA	Match
A1	Ga0222700_1000010	Ga0222700_100001067	66770	65838	preprotein translocase subunit SecF	Match
A1	Ga0222700_1000010	Ga0222700_100001068	68555	66795	preprotein translocase subunit SecD	Match
A1	Ga0222700_1000010	Ga0222700_100001069	70014	68719	sulfide dehydrogenase [flavocytochrome c] flavoprotein subunit	Match
A1	Ga0222700_1000010	Ga0222700_100001070	70583	70029	cytochrome c553	Partial match
A1	Ga0222700_1000010	Ga0222700_100001071	70739	72607	tRNA uridine 5-carboxymethylaminomethyl modification enzyme	No match	RNA modification
A1	Ga0222700_1000010	Ga0222700_100001072	72699	75101	DNA polymerase elongation subunit (family B)	Partial match
A1	Ga0222700_1000010	Ga0222700_100001073	75179	76402	flavorubredoxin	Match
A1	Ga0222700_1000010	Ga0222700_100001074	76741	76484	uncharacterized protein DUF721	Match
A1	Ga0222700_1000010	Ga0222700_100001075	77919	76792	DNA replication and repair protein RecF	Match
A1	Ga0222700_1000010	Ga0222700_100001076	79129	77993	DNA polymerase-3 subunit beta	Match
A1	Ga0222700_1000010	Ga0222700_100001077	80868	79402	chromosomal replication initiator protein	Match
A1	Ga0222700_1000010	Ga0222700_100001078	81506	81940	ribonuclease P protein component	Match
A1	Ga0222700_1000010	Ga0222700_100001079	81989	82255	hypothetical protein	Match
A1	Ga0222700_1000010	Ga0222700_100001080	82258	84000	YidC/Oxa1 family membrane protein insertase	Match
A1	Ga0222700_1000010	Ga0222700_100001081	84016	84615	undecaprenyl-diphosphatase	Match
A1	Ga0222700_1000010	Ga0222700_100001082	84566	86062	23S rRNA (uracil1939-C5)-methyltransferase	Match
A1	Ga0222700_1000010	Ga0222700_100001083	86463	86029	uncharacterized membrane protein YkvA (DUF1232 family)	Match
A1	Ga0222700_1000010	Ga0222700_100001084	87275	86460	membrane associated rhomboid family serine protease	Match
A1	Ga0222700_1000010	Ga0222700_100001085	88497	87304	phosphoglycerate kinase	Match
A1	Ga0222700_1000010	Ga0222700_100001086	89593	88619	UPF0755 protein	Match
A1	Ga0222700_1000010	Ga0222700_100001087	89945	89616	chorismate mutase	Match
A1	Ga0222700_1000010	Ga0222700_100001088	90505	89990	hypothetical protein	Match
A1	Ga0222700_1000010	Ga0222700_100001089	90644	91147	DNA-binding transcriptional regulator/RsmH inhibitor MraZ	Match
A1	Ga0222700_1000010	Ga0222700_100001090	91147	92133	16S rRNA (cytosine1402-N4)-methyltransferase	Match
A1	Ga0222700_1000010	Ga0222700_100001091	92126	92590	hypothetical protein	Match
A1	Ga0222700_1000010	Ga0222700_100001092	92624	94639	cell division protein FtsI (penicillin-binding protein 3)	Match
A1	Ga0222700_1000010	Ga0222700_100001093	94642	96198	UDP-N-acetylmuramoyl-L-alanyl-D-glutamate--2,6-diaminopimelate ligase/murE/murF fusion protein	Match
A1	Ga0222700_1000010	Ga0222700_100001094	96195	97616	UDP-N-acetylmuramoyl-tripeptide--D-alanyl-D-alanine ligase/murE/murF fusion protein	Match
A1	Ga0222700_1000010	Ga0222700_100001095	97627	98730	phospho-N-acetylmuramoyl-pentapeptide-transferase	Match
A1	Ga0222700_1000010	Ga0222700_100001096	98727	100124	UDP-N-acetylmuramoylalanine--D-glutamate ligase	Match
A1	Ga0222700_1000010	Ga0222700_100001097	100124	101266	cell division protein FtsW	Match
A1	Ga0222700_1000010	Ga0222700_100001098	101263	102369	UDP-N-acetylglucosamine--N-acetylmuramyl-(pentapeptide) pyrophosphoryl-undecaprenol N-acetylglucosamine transferase	Match
A1	Ga0222700_1000010	Ga0222700_100001099	102375	103784	UDP-N-acetylmuramate--alanine ligase	Match
A1	Ga0222700_1000010	Ga0222700_1000010100	103830	104621	cell division protein FtsQ	Match
A1	Ga0222700_1000010	Ga0222700_1000010101	104665	105957	cell division protein FtsA	Match
A1	Ga0222700_1000010	Ga0222700_1000010102	106000	107277	cell division protein FtsZ	Match
A1	Ga0222700_1000010	Ga0222700_1000010103	107303	108604	acetyl-CoA hydrolase	Partial match
A1	Ga0222700_1000010	Ga0222700_1000010104	109789	108710	bacteriochlorophyll C20 methyltransferase	Partial match
A2	Ga0222700_1000007	Ga0222700_10000071	41	126	tRNA_Leu_TAA	Match
A2	Ga0222700_1000007	Ga0222700_10000072	202	1569	tryptophan synthase beta chain	Match
A2	Ga0222700_1000007	Ga0222700_10000073	2052	1696	hypothetical protein	Match
A2	Ga0222700_1000007	Ga0222700_10000074	4718	2163	ATP-dependent Clp protease ATP-binding subunit ClpC	Match
A2	Ga0222700_1000007	Ga0222700_10000075	4742	5437	hypothetical protein	Match
A2	Ga0222700_1000007	Ga0222700_10000076	6779	5427	cobyrinic acid a,c-diamide synthase	Partial match
A2	Ga0222700_1000007	Ga0222700_10000077	7606	6776	nucleoside-diphosphate-sugar epimerase	Partial match
A2	Ga0222700_1000007	Ga0222700_10000078	7684	8556	7,8-dihydropterin-6-yl-methyl-4-(beta-D-ribofuranosyl)aminobenzene 5'-phosphate synthase	Match
A2	Ga0222700_1000007	Ga0222700_10000079	9218	8553	ribosome-associated toxin RatA of RatAB toxin-antitoxin module	Partial match
A2	Ga0222700_1000007	Ga0222700_100000710	9597	9524	tRNA_Pro_GGG	Match
A2	Ga0222700_1000007	Ga0222700_100000711	10562	9900	membrane-associated protein	Match
A2	Ga0222700_1000007	Ga0222700_100000712	10671	11558	pimeloyl-ACP methyl ester carboxylesterase	Match
A2	Ga0222700_1000007	Ga0222700_100000713	11618	13840	penicillin-binding protein 1A	Match
A2	Ga0222700_1000007	Ga0222700_100000714	13876	15417	GMP synthase (glutamine-hydrolysing)	Partial match
A2	Ga0222700_1000007	Ga0222700_100000715	15404	16639	phosphoserine phosphatase	Partial match
A2	Ga0222700_1000007	Ga0222700_100000716	17243	16731	NAD-dependent dihydropyrimidine dehydrogenase PreA subunit	Match
A2	Ga0222700_1000007	Ga0222700_100000717	17568	17272	NAD-dependent dihydropyrimidine dehydrogenase PreA subunit	Match
A2	Ga0222700_1000007	Ga0222700_100000718	19073	17679	NADPH-dependent 2,4-dienoyl-CoA reductase/sulfur reductase-like enzyme	Match
A2	Ga0222700_1000007	Ga0222700_100000719	21786	19126	alanyl-tRNA synthetase	Match
A2	Ga0222700_1000007	Ga0222700_100000720	22065	22337	hypothetical protein	Match
A2	Ga0222700_1000007	Ga0222700_100000721	22541	24424	2-oxoglutarate ferredoxin oxidoreductase subunit alpha	Match
A2	Ga0222700_1000007	Ga0222700_100000722	24428	25456	2-oxoglutarate ferredoxin oxidoreductase subunit beta	Match
A2	Ga0222700_1000007	Ga0222700_100000723	26544	25537	acetyl-CoA carboxylase carboxyl transferase subunit alpha	Match
A2	Ga0222700_1000007	Ga0222700_100000724	26956	26681	DNA-binding protein HU-beta	Match
A2	Ga0222700_1000007	Ga0222700_100000725	27141	27707	elongation factor P	Match
A2	Ga0222700_1000007	Ga0222700_100000726	27764	28225	acetyl-CoA carboxylase biotin carboxyl carrier protein	Match
A2	Ga0222700_1000007	Ga0222700_100000727	28298	29587	acetyl-CoA carboxylase biotin carboxylase subunit	Match
A2	Ga0222700_1000007	Ga0222700_100000728	34318	29864	DNA-directed RNA polymerase subunit beta'	Partial match
A2	Ga0222700_1000007	Ga0222700_100000729	38350	34391	DNA-directed RNA polymerase subunit beta	Match
A2	Ga0222700_1000007	Ga0222700_100000730	38874	38506	large subunit ribosomal protein L7/L12	Match
A2	Ga0222700_1000007	Ga0222700_100000731	39460	38942	large subunit ribosomal protein L10	Match
A2	Ga0222700_1000007	Ga0222700_100000732	40168	39479	large subunit ribosomal protein L1	Match
A2	Ga0222700_1000007	Ga0222700_100000733	40680	40255	large subunit ribosomal protein L11	Match
A2	Ga0222700_1000007	Ga0222700_100000734	41304	40729	transcriptional antiterminator NusG	Match
A2	Ga0222700_1000007	Ga0222700_100000735	41515	41324	preprotein translocase subunit SecE	Match
A2	Ga0222700_1000007	Ga0222700_100000736	41634	41562	tRNA_Trp_CCA	Match
A2	Ga0222700_1000007	Ga0222700_100000737	41735	41663	tRNA_Thr_GGT	Match
A2	Ga0222700_1000007	Ga0222700_100000738	41842	41760	tRNA_Tyr_GTA	Match
A2	Ga0222700_1000007	Ga0222700_100000739	41927	41855	tRNA_Thr_TGT	Match
A2	Ga0222700_1000007	Ga0222700_100000740	42771	41998	hypothetical protein	Match
A2	Ga0222700_1000007	Ga0222700_100000741	44839	42779	(E)-4-hydroxy-3-methylbut-2-enyl-diphosphate synthase	Match
A2	Ga0222700_1000007	Ga0222700_100000742	45124	44885	septum formation initiator	Match
A2	Ga0222700_1000007	Ga0222700_100000743	46525	45212	enolase	Match
A2	Ga0222700_1000007	Ga0222700_100000744	46687	48759	elongation factor G	Match
A2	Ga0222700_1000007	Ga0222700_100000745	49523	48765	dolichol-phosphate mannosyltransferase	Partial match
A2	Ga0222700_1000007	Ga0222700_100000746	50365	49619	photosystem P840 reaction center iron-sulfur protein	Match
A2	Ga0222700_1000007	Ga0222700_100000747	52671	50467	photosystem P840 reaction center large subunit	Match
A2	Ga0222700_1000007	Ga0222700_100000748	52973	53860	diaminopimelate epimerase	Match
A2	Ga0222700_1000007	Ga0222700_100000749	53997	54161	rubredoxin	Partial match
A2	Ga0222700_1000007	Ga0222700_100000750	55027	54224	monofunctional biosynthetic peptidoglycan transglycosylase	Partial match
A2	Ga0222700_1000007	Ga0222700_100000751	55144	55569	mono/diheme cytochrome c family protein	Match
A2	Ga0222700_1000007	Ga0222700_100000752	55707	55635	tRNA_Arg_CCT	Match
A2	Ga0222700_1000007	Ga0222700_100000753	57610	55766	DNA mismatch repair protein MutL	Match
A2	Ga0222700_1000007	Ga0222700_100000754	58991	57705	nicotinamide-nucleotide amidase	Match
A2	Ga0222700_1000007	Ga0222700_100000755	61467	59008	aspartokinase/homoserine dehydrogenase 1	Match
A2	Ga0222700_1000007	Ga0222700_100000756	62538	61663	F-type H+-transporting ATPase subunit gamma	Match
A2	Ga0222700_1000007	Ga0222700_100000757	64169	62589	F-type H+-transporting ATPase subunit alpha	Match
A2	Ga0222700_1000007	Ga0222700_100000758	64381	65343	homoserine kinase	Match
A2	Ga0222700_1000007	Ga0222700_100000759	65376	66689	threonine synthase	Match
A2	Ga0222700_1000007	Ga0222700_100000760	66693	67385	1-acyl-sn-glycerol-3-phosphate acyltransferase	Match
A2	Ga0222700_1000007	Ga0222700_100000761	67869	67402	6,7-dimethyl-8-ribityllumazine synthase	Match
A2	Ga0222700_1000007	Ga0222700_100000762	68530	67889	D-sedoheptulose 7-phosphate isomerase	Match
A2	Ga0222700_1000007	Ga0222700_100000763	69459	68635	voltage-gated potassium channel	Match
A2	Ga0222700_1000007	Ga0222700_100000764	70594	69539	uroporphyrinogen decarboxylase	Match
A2	Ga0222700_1000007	Ga0222700_100000765	71550	70702	succinate dehydrogenase / fumarate reductase cytochrome b subunit	Match
A2	Ga0222700_1000007	Ga0222700_100000766	72602	71568	succinate dehydrogenase / fumarate reductase iron-sulfur subunit	Match
A2	Ga0222700_1000007	Ga0222700_100000767	74318	72615	succinate dehydrogenase / fumarate reductase flavoprotein subunit	Match
A2	Ga0222700_1000007	Ga0222700_100000768	74870	74424	signal-transduction protein with cAMP-binding, CBS, and nucleotidyltransferase domain	Match
A2	Ga0222700_1000007	Ga0222700_100000769	75746	75099	glyoxylase-like metal-dependent hydrolase (beta-lactamase superfamily II)	Match
A2	Ga0222700_1000007	Ga0222700_100000770	76065	75757	hypothetical protein	Match
A2	Ga0222700_1000007	Ga0222700_100000771	79290	76084	multidrug efflux pump subunit AcrB	Match
A2	Ga0222700_1000007	Ga0222700_100000772	79703	79287	hypothetical protein	Match
A2	Ga0222700_1000007	Ga0222700_100000773	81077	79746	outer membrane protein TolC	Match
A2	Ga0222700_1000007	Ga0222700_100000774	81317	81084	DNA-binding FrmR family transcriptional regulator	Match
A2	Ga0222700_1000007	Ga0222700_100000775	82052	81438	uncharacterized protein DUF1997	Match
A2	Ga0222700_1000007	Ga0222700_100000776	82356	82583	chlorosome envelope protein B	Match
A2	Ga0222700_1000007	Ga0222700_100000777	82669	83673	hypothetical protein	Match
A2	Ga0222700_1000007	Ga0222700_100000778	83673	84632	mannose-1-phosphate guanylyltransferase	Match
A2	Ga0222700_1000007	Ga0222700_100000779	84629	85789	uncharacterized protein YbbC (DUF1343 family)	Match
A2	Ga0222700_1000007	Ga0222700_100000780	85812	87212	Na+/proline symporter	Match
A2	Ga0222700_1000007	Ga0222700_100000781	87359	88084	PAS domain-containing protein	No match	Cell signaling
A2	Ga0222700_1000007	Ga0222700_100000782	88201	88446	signal transduction histidine kinase	No match	Cell signaling
A2	Ga0222700_1000007	Ga0222700_100000783	88504	88704	DNA-binding response OmpR family regulator	Match
A2	Ga0222700_1000007	Ga0222700_100000784	89415	88720	uncharacterized protein YbjT (DUF2867 family)	Partial match
A2	Ga0222700_1000007	Ga0222700_100000785	89576	90901	uncharacterized protein YjbI with pentapeptide repeats/uncharacterized protein YjbI with pentapeptide repeats	Match
A2	Ga0222700_1000007	Ga0222700_100000786	90920	91153	hypothetical protein	Match
A2	Ga0222700_1000007	Ga0222700_100000787	91545	91180	hypothetical protein	Match
A2	Ga0222700_1000007	Ga0222700_100000788	92140	91610	hypothetical protein	Match
A2	Ga0222700_1000007	Ga0222700_100000789	94307	92382	KUP system potassium uptake protein	Match
A2	Ga0222700_1000007	Ga0222700_100000790	94802	95389	rare lipoprotein A	Partial match
A2	Ga0222700_1000007	Ga0222700_100000791	95715	95846	rare lipoprotein A	No match	Other metabolism
A2	Ga0222700_1000007	Ga0222700_100000792	96564	95887	uncharacterized metal-binding protein	No match	General function
A2	Ga0222700_1000007	Ga0222700_100000793	96711	97835	regulator of protease activity HflC (stomatin/prohibitin superfamily)	No match	Transcription regulation
A2	Ga0222700_1000007	Ga0222700_100000794	97835	98077	hypothetical protein	Partial match
A2	Ga0222700_1000007	Ga0222700_100000795	99423	97996	tRNA modification GTPase	Partial match
A2	Ga0222700_1000007	Ga0222700_100000796	99546	100370	XTP/dITP diphosphohydrolase	Partial match
A2	Ga0222700_1000007	Ga0222700_100000797	101034	100375	predicted esterase	Partial match
A2	Ga0222700_1000007	Ga0222700_100000798	104389	101090	maltose alpha-D-glucosyltransferase/alpha-amylase	Match
A2	Ga0222700_1000007	Ga0222700_100000799	106460	104448	starch synthase (maltosyl-transferring)	Match
A2	Ga0222700_1000007	Ga0222700_1000007100	106798	107859	peptide chain release factor 2	Match
A2	Ga0222700_1000007	Ga0222700_1000007101	107868	108668	calcineurin-like phosphoesterase family protein	Match
A2	Ga0222700_1000007	Ga0222700_1000007102	108688	109542	murein DD-endopeptidase MepM/ murein hydrolase activator NlpD	Match
A2	Ga0222700_1000007	Ga0222700_1000007103	110579	109539	UDP-N-acetylglucosamine 2-epimerase	Match
A2	Ga0222700_1000007	Ga0222700_1000007104	110664	111659	OstA-like protein	Match
A2	Ga0222700_1000007	Ga0222700_1000007105	111971	111714	predicted nucleic acid-binding Zn ribbon protein	Match
A2	Ga0222700_1000007	Ga0222700_1000007106	112101	112886	DNA repair protein RecO (recombination protein O)	Match
A2	Ga0222700_1000007	Ga0222700_1000007107	112997	114292	glutamate-1-semialdehyde 2,1-aminomutase	Match
A2	Ga0222700_1000007	Ga0222700_1000007108	114730	114386	hypothetical protein	Match
A2	Ga0222700_1000007	Ga0222700_1000007109	115125	114721	fluoride ion exporter CrcB/FEX	Partial match
A2	Ga0222700_1000007	Ga0222700_1000007110	115377	115147	hypothetical protein	No match	Hypothetical
A2	Ga0222700_1000007	Ga0222700_1000007111	115851	118070	thiosulfate reductase/polysulfide reductase chain A	No match	Sulfur cycling
A2	Ga0222700_1000007	Ga0222700_1000007112	118098	118640	Fe-S-cluster-containing dehydrogenase component	No match	General function
A2	Ga0222700_1000007	Ga0222700_1000007113	118643	119638	formate-dependent nitrite reductase membrane component NrfD	No match	Other metabolism
A2	Ga0222700_1000007	Ga0222700_1000007114	121341	119908	sulfide:quinone oxidoreductase	Match
A2	Ga0222700_1000007	Ga0222700_1000007115	121537	121965	putative Holliday junction resolvase	Match
A2	Ga0222700_1000007	Ga0222700_1000007116	122082	122657	orotate phosphoribosyltransferase	Match
A2	Ga0222700_1000007	Ga0222700_1000007117	122654	123523	prephenate dehydrogenase	Match
A2	Ga0222700_1000007	Ga0222700_1000007118	123520	124365	NAD+ kinase	Partial match
A2	Ga0222700_1000007	Ga0222700_1000007119	124926	124375	3-deoxy-D-manno-octulosonate 8-phosphate phosphatase (KDO 8-P phosphatase)	Partial match
A2	Ga0222700_1000007	Ga0222700_1000007120	125792	124962	2-dehydro-3-deoxyphosphooctonate aldolase (KDO 8-P synthase)	Match
A2	Ga0222700_1000007	Ga0222700_1000007121	125935	127257	ATP-dependent Clp protease ATP-binding subunit ClpA	Match
A2	Ga0222700_1000007	Ga0222700_1000007122	127254	128402	beta-N-acetylhexosaminidase	Match
A2	Ga0222700_1000007	Ga0222700_1000007123	128399	128899	phosphohistidine phosphatase	Match
A2	Ga0222700_1000007	Ga0222700_1000007124	129921	128920	glycerol-3-phosphate dehydrogenase (NAD(P)+)	Match
A2	Ga0222700_1000007	Ga0222700_1000007125	130647	129940	glycerol-3-phosphate acyltransferase PlsY	Match
A2	Ga0222700_1000007	Ga0222700_1000007126	131703	130714	phosphoribosylformylglycinamidine cyclo-ligase	Match
A2	Ga0222700_1000007	Ga0222700_1000007127	133174	131762	aspartate kinase	Match
A2	Ga0222700_1000007	Ga0222700_1000007128	133372	134244	ribosomal protein L11 methyltransferase	Match
A2	Ga0222700_1000007	Ga0222700_1000007129	134271	135209	exopolyphosphatase/guanosine-5'-triphosphate,3'-diphosphate pyrophosphatase	Match
A2	Ga0222700_1000007	Ga0222700_1000007130	136401	135172	protein-L-isoaspartate O-methyltransferase	Match
A2	Ga0222700_1000007	Ga0222700_1000007131	137681	136398	adenosylmethionine-8-amino-7-oxononanoate aminotransferase	Match
A2	Ga0222700_1000007	Ga0222700_1000007132	138402	137713	dethiobiotin synthetase	Match
A2	Ga0222700_1000007	Ga0222700_1000007133	139181	138399	malonyl-CoA O-methyltransferase	Match
A2	Ga0222700_1000007	Ga0222700_1000007134	139858	139178	biotin synthesis protein BioG	Match
A2	Ga0222700_1000007	Ga0222700_1000007135	140979	139855	8-amino-7-oxononanoate synthase	Match
A2	Ga0222700_1000007	Ga0222700_1000007136	142028	141030	biotin synthase	Match
A2	Ga0222700_1000007	Ga0222700_1000007137	143036	142059	BirA family biotin operon repressor/biotin-[acetyl-CoA-carboxylase] ligase	Match
A2	Ga0222700_1000007	Ga0222700_1000007138	144858	143140	N-acetylmuramoyl-L-alanine amidase	Match
A2	Ga0222700_1000007	Ga0222700_1000007139	145069	147480	DNA topoisomerase-1	Match
A2	Ga0222700_1000007	Ga0222700_1000007140	149608	147470	ferrous iron transport protein B	Match
A2	Ga0222700_1000007	Ga0222700_1000007141	149898	149605	ferrous iron transport protein A	Match
A2	Ga0222700_1000007	Ga0222700_1000007142	150409	150026	histidine triad (HIT) family protein	Match
A2	Ga0222700_1000007	Ga0222700_1000007143	151730	150414	putative hemolysin	Match
A2	Ga0222700_1000007	Ga0222700_1000007144	152434	151952	quercetin dioxygenase-like cupin family protein	Match
A2	Ga0222700_1000007	Ga0222700_1000007145	153809	152475	outer membrane protein	No match	Transport
A2	Ga0222700_1000007	Ga0222700_1000007146	155472	153880	multidrug efflux pump subunit AcrB	No match	Transport
A2	Ga0222700_1000007	Ga0222700_1000007147	157057	155582	multidrug efflux pump subunit AcrB	No match	Transport
A2	Ga0222700_1000007	Ga0222700_1000007148	158240	157122	multidrug efflux pump subunit AcrA (membrane-fusion protein)/multidrug efflux pump subunit AcrA (membrane-fusion protein)	No match	Transport
A2	Ga0222700_1000007	Ga0222700_1000007149	158746	158228	DNA-binding MarR family transcriptional regulator	No match	Transcription regulation
A2	Ga0222700_1000007	Ga0222700_1000007150	158958	159614	uncharacterized repeat protein	Match
A2	Ga0222700_1000007	Ga0222700_1000007151	160392	159619	succinate dehydrogenase / fumarate reductase iron-sulfur subunit	Match
A2	Ga0222700_1000007	Ga0222700_1000007152	162365	160425	succinate dehydrogenase / fumarate reductase flavoprotein subunit	Match
A2	Ga0222700_1000007	Ga0222700_1000007153	163050	162385	succinate dehydrogenase / fumarate reductase cytochrome b subunit	Match
A2	Ga0222700_1000007	Ga0222700_1000007154	164138	163152	dihydroorotate dehydrogenase (fumarate)	Match
A2	Ga0222700_1000007	Ga0222700_1000007155	165147	164344	esterase/lipase	Partial match
A2	Ga0222700_1000007	Ga0222700_1000007156	165307	165816	rare lipoprotein A	Match
A2	Ga0222700_1000007	Ga0222700_1000007157	166496	165828	transaldolase	Match
A2	Ga0222700_1000007	Ga0222700_1000007158	167555	166506	deoxyhypusine synthase	Match
A2	Ga0222700_1000007	Ga0222700_1000007159	167824	168945	tryptophanyl-tRNA synthetase	Match
A2	Ga0222700_1000007	Ga0222700_1000007160	168942	169628	beta-phosphoglucomutase	Match
A2	Ga0222700_1000007	Ga0222700_1000007161	169648	171306	arginyl-tRNA synthetase	Match
A2	Ga0222700_1000007	Ga0222700_1000007162	171903	171298	nicotinate-nucleotide adenylyltransferase	Match
A2	Ga0222700_1000007	Ga0222700_1000007163	172831	171917	outer membrane protein assembly factor BamD	Match
A2	Ga0222700_1000007	Ga0222700_1000007164	172972	172900	tRNA_Ala_CGC	Match
A2	Ga0222700_1000007	Ga0222700_1000007165	173597	173052	F-type H+-transporting ATPase subunit delta	Match
A2	Ga0222700_1000007	Ga0222700_1000007166	174138	173611	F-type H+-transporting ATPase subunit b	Match
A2	Ga0222700_1000007	Ga0222700_1000007167	174460	174233	F-type H+-transporting ATPase subunit c	Match
A2	Ga0222700_1000007	Ga0222700_1000007168	175626	174580	F-type H+-transporting ATPase subunit a	Match
A2	Ga0222700_1000007	Ga0222700_1000007169	176009	175623	hypothetical protein	Match
A2	Ga0222700_1000007	Ga0222700_1000007170	176288	176043	F0F1-type ATP synthase assembly protein I	Match
A2	Ga0222700_1000007	Ga0222700_1000007171	176363	177289	hypothetical protein	Match
A3	Ga0222700_1000009	Ga0222700_10000091	1250	357	predicted HTH transcriptional regulator	No match	Transcription regulation
A3	Ga0222700_1000009	Ga0222700_10000092	1558	1292	uncharacterized protein DUF4062	No match	Hypothetical
A3	Ga0222700_1000009	Ga0222700_10000093	1776	1522	type I restriction enzyme M protein	No match	Cell defence
A3	Ga0222700_1000009	Ga0222700_10000094	2045	1773	type I restriction enzyme M protein	No match	Cell defence
A3	Ga0222700_1000009	Ga0222700_10000095	3588	2323	cytochrome b6	Match
A3	Ga0222700_1000009	Ga0222700_10000096	4168	3623	cytochrome b6-f complex iron-sulfur subunit	Match
A3	Ga0222700_1000009	Ga0222700_10000097	5447	4320	carotenoid 1,2-hydratase	Match
A3	Ga0222700_1000009	Ga0222700_10000098	5652	5580	tRNA_Phe_GAA	Match
A3	Ga0222700_1000009	Ga0222700_10000099	7259	5748	glutamyl-tRNA synthetase	Match
A3	Ga0222700_1000009	Ga0222700_100000910	7509	9494	cell division protease FtsH	Match
A3	Ga0222700_1000009	Ga0222700_100000911	9509	9889	hypothetical protein	Match
A3	Ga0222700_1000009	Ga0222700_100000912	9928	10236	DNA-binding protein HU-beta	Match
A3	Ga0222700_1000009	Ga0222700_100000913	10635	10249	hypothetical protein	Match
A3	Ga0222700_1000009	Ga0222700_100000914	12126	10669	Na+/H+ antiporter NhaD/arsenite permease-like protein	Match
A3	Ga0222700_1000009	Ga0222700_100000915	12675	12142	adenine phosphoribosyltransferase	Match
A3	Ga0222700_1000009	Ga0222700_100000916	14077	12725	threonylcarbamoyladenosine tRNA methylthiotransferase MtaB	Match
A3	Ga0222700_1000009	Ga0222700_100000917	14226	14678	hypothetical protein	Match
A3	Ga0222700_1000009	Ga0222700_100000918	15955	14732	rod shape determining protein RodA	Match
A3	Ga0222700_1000009	Ga0222700_100000919	16059	16976	GTP-binding protein Era	Match
A3	Ga0222700_1000009	Ga0222700_100000920	19015	17066	small subunit ribosomal protein S1	Match
A3	Ga0222700_1000009	Ga0222700_100000921	19691	18978	cytidylate kinase	Match
A3	Ga0222700_1000009	Ga0222700_100000922	19842	20933	hypothetical protein	Match
A3	Ga0222700_1000009	Ga0222700_100000923	20976	21791	glutamate racemase	Match
A3	Ga0222700_1000009	Ga0222700_100000924	21769	22857	4-hydroxy-3-methylbut-2-enyl diphosphate reductase	Partial match
A3	Ga0222700_1000009	Ga0222700_100000925	23133	22885	hypothetical protein	Match
A3	Ga0222700_1000009	Ga0222700_100000926	24386	23136	lipid-A-disaccharide synthase	Match
A3	Ga0222700_1000009	Ga0222700_100000927	24428	25810	phosphomannomutase	Match
A3	Ga0222700_1000009	Ga0222700_100000928	25862	26533	RNA polymerase sigma-70 factor (ECF subfamily)	Match
A3	Ga0222700_1000009	Ga0222700_100000929	26601	26990	hypothetical protein	Match
A3	Ga0222700_1000009	Ga0222700_100000930	27042	27527	heavy-metal resistance protein	Match
A3	Ga0222700_1000009	Ga0222700_100000931	27577	28491	uncharacterized protein DUF4405	Match
A3	Ga0222700_1000009	Ga0222700_100000932	30036	28555	O-antigen/teichoic acid export membrane protein	Match
A3	Ga0222700_1000009	Ga0222700_100000933	30405	30067	hypothetical protein	Match
A3	Ga0222700_1000009	Ga0222700_100000934	30522	31490	arabinose-5-phosphate isomerase	Match
A3	Ga0222700_1000009	Ga0222700_100000935	32449	31547	succinyl-CoA synthetase alpha subunit	Match
A3	Ga0222700_1000009	Ga0222700_100000936	33920	32481	aspartyl-tRNA(Asn)/glutamyl-tRNA(Gln) amidotransferase subunit A	Match
A3	Ga0222700_1000009	Ga0222700_100000937	34141	34983	undecaprenyl diphosphate synthase	Match
A3	Ga0222700_1000009	Ga0222700_100000938	35005	37482	outer membrane protein insertion porin family	Match
A3	Ga0222700_1000009	Ga0222700_100000939	37614	38192	opacity protein-like surface antigen	Match
A3	Ga0222700_1000009	Ga0222700_100000940	38881	38273	hypothetical protein	Match
A3	Ga0222700_1000009	Ga0222700_100000941	39929	38931	electron transfer flavoprotein alpha subunit	Match
A3	Ga0222700_1000009	Ga0222700_100000942	40675	39926	electron transfer flavoprotein beta subunit	Match
A3	Ga0222700_1000009	Ga0222700_100000943	40825	40744	tRNA_Leu_GAG	Match
A3	Ga0222700_1000009	Ga0222700_100000944	40932	40860	tRNA_Lys_TTT	Match
A3	Ga0222700_1000009	Ga0222700_100000945	42485	41196	transcription termination factor Rho	Match
A3	Ga0222700_1000009	Ga0222700_100000946	42750	42514	hypothetical protein	Match
A3	Ga0222700_1000009	Ga0222700_100000947	44043	42757	dihydrofolate synthase/folylpolyglutamate synthase	Match
A3	Ga0222700_1000009	Ga0222700_100000948	44658	44056	Holliday junction DNA helicase RuvA	Match
A3	Ga0222700_1000009	Ga0222700_100000949	44960	44685	small subunit ribosomal protein S20	Match
A3	Ga0222700_1000009	Ga0222700_100000950	45107	46531	phosphomannomutase	Match
A3	Ga0222700_1000009	Ga0222700_100000951	46541	48337	ATP-binding cassette subfamily B protein	Match
A3	Ga0222700_1000009	Ga0222700_100000952	49687	48419	lipoprotein-releasing system permease protein	Match
A3	Ga0222700_1000009	Ga0222700_100000953	49801	50874	isopentenyl-diphosphate delta-isomerase	Match
A3	Ga0222700_1000009	Ga0222700_100000954	50886	51878	geranylgeranyl diphosphate synthase type II	Match
A3	Ga0222700_1000009	Ga0222700_100000955	52151	53026	DNA processing protein	Match
A3	Ga0222700_1000009	Ga0222700_100000956	54096	53005	ADP-heptose:LPS heptosyltransferase	Match
A3	Ga0222700_1000009	Ga0222700_100000957	54250	54801	outer membrane protein	Match
A3	Ga0222700_1000009	Ga0222700_100000958	54841	55428	lipopolysaccharide export system protein LptC	Match
A3	Ga0222700_1000009	Ga0222700_100000959	55451	55837	aspartate 1-decarboxylase	Match
A3	Ga0222700_1000009	Ga0222700_100000960	55863	56633	bifunctional N-acetylglucosamine-1-phosphate-uridyltransferase/glucosamine-1-phosphate-acetyltransferase GlmU-like protein	Partial match
A3	Ga0222700_1000009	Ga0222700_100000961	57135	56662	catechol-2,3-dioxygenase	Match
A3	Ga0222700_1000009	Ga0222700_100000962	57469	57116	hypothetical protein	Match
A3	Ga0222700_1000009	Ga0222700_100000963	58066	57482	guanylate kinase	Match
A3	Ga0222700_1000009	Ga0222700_100000964	58961	58074	uncharacterized protein YicC (UPF0701 family)	Match
A3	Ga0222700_1000009	Ga0222700_100000965	59319	59050	small subunit ribosomal protein S15	Match
A3	Ga0222700_1000009	Ga0222700_100000966	60303	59371	riboflavin kinase/FMN adenylyltransferase	Match
A3	Ga0222700_1000009	Ga0222700_100000967	61083	60340	tRNA pseudouridine55 synthase	Match
A3	Ga0222700_1000009	Ga0222700_100000968	61467	61108	ribosome-binding factor A	Match
A3	Ga0222700_1000009	Ga0222700_100000969	64218	61483	translation initiation factor IF-2	Match
A3	Ga0222700_1000009	Ga0222700_100000970	65952	64288	N utilization substance protein A	Match
A3	Ga0222700_1000009	Ga0222700_100000971	66509	65991	ribosome maturation factor RimP	Match
A3	Ga0222700_1000009	Ga0222700_100000972	66867	66649	hypothetical protein	Match
A3	Ga0222700_1000009	Ga0222700_100000973	67248	66988	glutaredoxin-like protein DUF836	No match	General function
A3	Ga0222700_1000009	Ga0222700_100000974	68537	67245	histidyl-tRNA synthetase	Partial match
A3	Ga0222700_1000009	Ga0222700_100000975	69037	68567	PTS system fructose-specific IIA component/PTS system nitrogen regulatory IIA component	Match
A3	Ga0222700_1000009	Ga0222700_100000976	70047	69232	phosphatidate cytidylyltransferase	Match
A3	Ga0222700_1000009	Ga0222700_100000977	70968	70057	hypothetical protein	Partial match
A3	Ga0222700_1000009	Ga0222700_100000978	71190	72269	glycosyltransferase involved in cell wall biosynthesis	Partial match
A3	Ga0222700_1000009	Ga0222700_100000979	73030	72419	PhoP regulatory network protein YrbL	No match	Transcription regulation
A3	Ga0222700_1000009	Ga0222700_100000980	73213	74286	glycosyltransferase involved in cell wall biosynthesis	No match	Cell wall modification
A3	Ga0222700_1000009	Ga0222700_100000981	74283	75383	glycosyltransferase involved in cell wall biosynthesis	Partial match
A3	Ga0222700_1000009	Ga0222700_100000982	75383	76477	ADP-heptose:LPS heptosyltransferase	Partial match
A3	Ga0222700_1000009	Ga0222700_100000983	76527	77519	glycosyl hydrolase family 32	Match
A3	Ga0222700_1000009	Ga0222700_100000984	77521	78843	UDP-N-acetyl-D-galactosamine dehydrogenase	Match
A3	Ga0222700_1000009	Ga0222700_100000985	79131	78991	hypothetical protein	Match
A3	Ga0222700_1000009	Ga0222700_100000986	79184	79810	glycosyl transferase family 1	Partial match
A3	Ga0222700_1000009	Ga0222700_100000987	79848	81041	phosphatidylinositol alpha-1,6-mannosyltransferase	Partial match
A3	Ga0222700_1000009	Ga0222700_100000988	81045	82061	glycosyltransferase involved in cell wall biosynthesis	Partial match
A3	Ga0222700_1000009	Ga0222700_100000989	82074	83147	glycosyltransferase involved in cell wall biosynthesis	No match	Cell wall modification
A3	Ga0222700_1000009	Ga0222700_100000990	83160	84185	glycosyltransferase involved in cell wall biosynthesis	No match	Cell wall modification
A3	Ga0222700_1000009	Ga0222700_100000991	84273	85370	glycosyltransferase involved in cell wall biosynthesis	No match	Cell wall modification
A3	Ga0222700_1000009	Ga0222700_100000992	85650	86354	hypothetical protein	No match	Hypothetical
A3	Ga0222700_1000009	Ga0222700_100000993	86639	87397	hypothetical protein	No match	Hypothetical
A3	Ga0222700_1000009	Ga0222700_100000994	88398	87439	hypothetical protein	No match	Hypothetical
A3	Ga0222700_1000009	Ga0222700_100000995	89011	88382	ubiquinone/menaquinone biosynthesis C-methylase UbiE	No match	Cell wall modification
A3	Ga0222700_1000009	Ga0222700_100000996	91058	89133	ABC-type multidrug transport system fused ATPase/permease subunit	Partial match
A3	Ga0222700_1000009	Ga0222700_100000997	92240	91227	KDO2-lipid IV(A) lauroyltransferase	Partial match
A3	Ga0222700_1000009	Ga0222700_100000998	92501	92271	putative transposase	Match
A3	Ga0222700_1000009	Ga0222700_100000999	93081	92491	putative transposase	Match
A3	Ga0222700_1000009	Ga0222700_1000009100	93394	93035	transposase	No match	Mobile element
A3	Ga0222700_1000009	Ga0222700_1000009101	93593	94105	bifunctional ADP-heptose synthase (sugar kinase/adenylyltransferase)	Match
A3	Ga0222700_1000009	Ga0222700_1000009102	94092	98600	uncharacterized protein DUF490	Match
A3	Ga0222700_1000009	Ga0222700_1000009103	98796	99014	hypothetical protein	No match	Hypothetical
A3	Ga0222700_1000009	Ga0222700_1000009104	99192	99353	hypothetical protein	No match	Hypothetical
A3	Ga0222700_1000009	Ga0222700_1000009105	99508	99681	hypothetical protein	Match
A3	Ga0222700_1000009	Ga0222700_1000009106	99750	100040	hypothetical protein	Partial match
A3	Ga0222700_1000009	Ga0222700_1000009107	100110	101348	phosphopantothenoylcysteine decarboxylase/phosphopantothenate--cysteine ligase	Match
A3	Ga0222700_1000009	Ga0222700_1000009108	101345	101920	DNA polymerase	Match
A3	Ga0222700_1000009	Ga0222700_1000009109	101917	103440	replicative DNA helicase	Match
A3	Ga0222700_1000009	Ga0222700_1000009110	103454	105256	phosphotransferase system enzyme I (PtsI)	Match
A3	Ga0222700_1000009	Ga0222700_1000009111	107385	105271	peptidylprolyl isomerase/peptidyl-prolyl cis-trans isomerase D	Match
A3	Ga0222700_1000009	Ga0222700_1000009112	108096	107407	protein-L-isoaspartate(D-aspartate) O-methyltransferase	Match
A3	Ga0222700_1000009	Ga0222700_1000009113	108167	108799	Uri superfamily endonuclease/Uri superfamily endonuclease	Match
A3	Ga0222700_1000009	Ga0222700_1000009114	109732	108788	fused signal recognition particle receptor	Match
A3	Ga0222700_1000009	Ga0222700_1000009115	109817	110881	thiamine-monophosphate kinase	Match
A3	Ga0222700_1000009	Ga0222700_1000009116	111073	111158	tRNA_Leu_TAA	Match
A4	Ga0222700_1002289	Ga0222700_10022891	775	98	protease secretion system outer membrane protein	No match	Transport
A4	Ga0222700_1002289	Ga0222700_10022892	2023	854	protease secretion system membrane fusion protein	No match	Transport
A4	Ga0222700_1002289	Ga0222700_10022893	3767	2061	ATP-binding cassette subfamily C exporter for protease/lipase	No match	Transport
A5	Ga0222700_1000205	Ga0222700_10002051	188	418	hypothetical protein	No match	Hypothetical
A5	Ga0222700_1000205	Ga0222700_10002052	509	1474	peptide methionine sulfoxide reductase msrA/msrB	Partial match
A5	Ga0222700_1000205	Ga0222700_10002053	1567	2166	predicted DNA-binding protein (UPF0251 family)	Match
A5	Ga0222700_1000205	Ga0222700_10002054	2163	2531	predicted Fe-Mo cluster-binding NifX family protein	Match
A5	Ga0222700_1000205	Ga0222700_10002055	3371	2571	ZIP family zinc transporter	Match
A5	Ga0222700_1000205	Ga0222700_10002056	3934	3368	hypothetical protein	Match
A5	Ga0222700_1000205	Ga0222700_10002057	4572	3931	glycosyltransferase involved in cell wall biosynthesis	Match
A5	Ga0222700_1000205	Ga0222700_10002058	5474	4569	chlorophyll synthase	Match
A5	Ga0222700_1000205	Ga0222700_10002059	5671	6153	hypothetical protein	Match
A5	Ga0222700_1000205	Ga0222700_100020510	6150	6773	threonine/homoserine/homoserine lactone efflux protein	No match	Transport
A5	Ga0222700_1000205	Ga0222700_100020511	6779	7075	PHD/YefM family antitoxin component YafN of YafNO toxin-antitoxin module	No match	Cell defence
A5	Ga0222700_1000205	Ga0222700_100020512	7109	8050	D-alanyl-D-alanine carboxypeptidase (penicillin-binding protein 5/6)	Partial match
A5	Ga0222700_1000205	Ga0222700_100020513	8083	8388	stress responsive alpha/beta barrel protein	Match
A5	Ga0222700_1000205	Ga0222700_100020514	8642	8454	ferredoxin	Match
A5	Ga0222700_1000205	Ga0222700_100020515	8993	8805	ferredoxin	Match
A5	Ga0222700_1000205	Ga0222700_100020516	9209	9012	hypothetical protein	Partial match
A5	Ga0222700_1000205	Ga0222700_100020517	10656	9229	signal transduction histidine kinase	No match	Cell signaling
A5	Ga0222700_1000205	Ga0222700_100020518	11246	10653	DNA-binding response OmpR family regulator	No match	Transcription regulation
A5	Ga0222700_1000205	Ga0222700_100020519	11815	11342	hypothetical protein	No match	Hypothetical
A5	Ga0222700_1000205	Ga0222700_100020520	11924	11793	hypothetical protein	No match	Hypothetical
A6	Ga0222700_1001909	Ga0222700_10019091	3	80	hypothetical protein	Match
A6	Ga0222700_1001909	Ga0222700_10019092	2226	106	superfamily I DNA and/or RNA helicase	No match	General function
A6	Ga0222700_1001909	Ga0222700_10019093	2771	2980	hypothetical protein	No match	Hypothetical
A6	Ga0222700_1001909	Ga0222700_10019094	3577	2921	cell filamentation protein	No match	Post-translation modification
A6	Ga0222700_1001909	Ga0222700_10019095	3912	3839	tRNA_Val_CAC	Match
A7	Ga0222700_1000764	Ga0222700_10007641	1	795	superfamily I DNA and/or RNA helicase	No match	General function
A7	Ga0222700_1000764	Ga0222700_10007642	2186	1125	IS5 family transposase	No match	Mobile element
A7	Ga0222700_1000764	Ga0222700_10007643	2908	2375	hypothetical protein	No match	Hypothetical
A7	Ga0222700_1000764	Ga0222700_10007644	3952	3194	acyl-ACP thioesterase	No match	Other metabolism
A7	Ga0222700_1000764	Ga0222700_10007645	4157	3966	DDE family transposase	No match	Mobile element
A7	Ga0222700_1000764	Ga0222700_10007646	4405	4821	nitrite reductase/ring-hydroxylating ferredoxin subunit	No match	General function
A7	Ga0222700_1000764	Ga0222700_10007647	4867	5019	hypothetical protein	No match	Hypothetical
A7	Ga0222700_1000764	Ga0222700_10007648	5768	5256	hypothetical protein	No match	Hypothetical
A7	Ga0222700_1000764	Ga0222700_10007649	6403	5717	hypothetical protein	No match	Hypothetical
A8	Ga0222700_1000005	Ga0222700_10000051	1042	821	hypothetical protein	No match	Hypothetical
A8	Ga0222700_1000005	Ga0222700_10000052	2442	1069	SSS family solute:Na+ symporter	No match	Transport
A8	Ga0222700_1000005	Ga0222700_10000053	3305	2502	ferredoxin--NADP+ reductase	Match
A8	Ga0222700_1000005	Ga0222700_10000054	4735	3386	outer membrane protein TolC	Match
A8	Ga0222700_1000005	Ga0222700_10000055	8016	4813	HAE1 family hydrophobic/amphiphilic exporter-1	Match
A8	Ga0222700_1000005	Ga0222700_10000056	9125	8022	membrane fusion protein (multidrug efflux system)	Match
A8	Ga0222700_1000005	Ga0222700_10000057	9718	9257	methylated-DNA-[protein]-cysteine S-methyltransferase	No match	Other metabolism
A8	Ga0222700_1000005	Ga0222700_10000058	9953	9864	tRNA_Ser_GCT	Match
A8	Ga0222700_1000005	Ga0222700_10000059	10047	9965	tRNA_Ser_TGA	No match	tRNA
A8	Ga0222700_1000005	Ga0222700_100000510	10451	10365	tRNA_Ser_GGA	Match
A8	Ga0222700_1000005	Ga0222700_100000511	10589	12082	IMP dehydrogenase	Match
A8	Ga0222700_1000005	Ga0222700_100000512	15979	12152	magnesium chelatase subunit H	Match
A8	Ga0222700_1000005	Ga0222700_100000513	17924	16062	magnesium chelatase subunit D	Match
A8	Ga0222700_1000005	Ga0222700_100000514	19103	17925	magnesium chelatase subunit I	Match
A8	Ga0222700_1000005	Ga0222700_100000515	20659	19238	dihydrolipoamide dehydrogenase	Match
A8	Ga0222700_1000005	Ga0222700_100000516	20728	21777	23S rRNA-/tRNA-specific pseudouridylate synthase	Partial match
A8	Ga0222700_1000005	Ga0222700_100000517	22019	21669	hypothetical protein	Partial match
A8	Ga0222700_1000005	Ga0222700_100000518	22091	22744	predicted ferric reductase	No match	General function
A8	Ga0222700_1000005	Ga0222700_100000519	22747	24501	succinate dehydrogenase/fumarate reductase flavoprotein subunit/succinate dehydrogenase/fumarate reductase flavoprotein subunit/succinate dehydrogenase/fumarate reductase flavoprotein subunit	No match	Sulfur cycling
A8	Ga0222700_1000005	Ga0222700_100000520	24689	25201	hypothetical protein	Match
A8	Ga0222700_1000005	Ga0222700_100000521	25291	27489	prolyl oligopeptidase	Match
A8	Ga0222700_1000005	Ga0222700_100000522	29517	27514	ATP-binding cassette subfamily F protein uup	Match
A8	Ga0222700_1000005	Ga0222700_100000523	29609	30166	hypothetical protein	Partial match
A8	Ga0222700_1000005	Ga0222700_100000524	30513	30208	thioredoxin 1/thioredoxin 2	Partial match
A8	Ga0222700_1000005	Ga0222700_100000525	30704	31177	6-pyruvoyltetrahydropterin/6-carboxytetrahydropterin synthase	Match
A8	Ga0222700_1000005	Ga0222700_100000526	31137	31808	GTP cyclohydrolase I	Match
A8	Ga0222700_1000005	Ga0222700_100000527	33454	31919	NADH:ubiquinone oxidoreductase subunit 2 (subunit N)	Match
A8	Ga0222700_1000005	Ga0222700_100000528	35130	33493	NADH:ubiquinone oxidoreductase subunit 4 (subunit M)	Match
A8	Ga0222700_1000005	Ga0222700_100000529	37391	35172	NADH:ubiquinone oxidoreductase subunit 5 (subunit L)/multisubunit Na+/H+ antiporter MnhA subunit	Match
A8	Ga0222700_1000005	Ga0222700_100000530	37762	37445	NADH:ubiquinone oxidoreductase subunit K	Match
A8	Ga0222700_1000005	Ga0222700_100000531	38296	37775	NADH:ubiquinone oxidoreductase subunit 6 (subunit J)	Match
A8	Ga0222700_1000005	Ga0222700_100000532	38944	38312	formate hydrogenlyase subunit 6/NADH:ubiquinone oxidoreductase subunit I	Match
A8	Ga0222700_1000005	Ga0222700_100000533	40073	38985	NADH:ubiquinone oxidoreductase subunit H	Match
A8	Ga0222700_1000005	Ga0222700_100000534	41302	40100	NADH:ubiquinone oxidoreductase subunit D/NADH:ubiquinone oxidoreductase subunit D	Match
A8	Ga0222700_1000005	Ga0222700_100000535	41851	41333	NADH:ubiquinone oxidoreductase subunit C	Match
A8	Ga0222700_1000005	Ga0222700_100000536	42453	41884	NADH:ubiquinone oxidoreductase subunit B-like Fe-S oxidoreductase	Match
A8	Ga0222700_1000005	Ga0222700_100000537	42914	42483	NADH:ubiquinone oxidoreductase subunit 3 (subunit A)	Match
A8	Ga0222700_1000005	Ga0222700_100000538	43301	43050	hypothetical protein	Match
A8	Ga0222700_1000005	Ga0222700_100000539	43870	43298	tetratricopeptide (TPR) repeat protein	Match
A8	Ga0222700_1000005	Ga0222700_100000540	44974	43910	ferrochelatase	Match
A8	Ga0222700_1000005	Ga0222700_100000541	45585	44956	hypothetical protein	Match
A8	Ga0222700_1000005	Ga0222700_100000542	45656	45737	tRNA_Leu_TAG	Match
A8	Ga0222700_1000005	Ga0222700_100000543	45754	45838	tRNA_Leu_CAA	Match
A8	Ga0222700_1000005	Ga0222700_100000544	45874	46392	ATP adenylyltransferase	Match
A8	Ga0222700_1000005	Ga0222700_100000545	46407	47342	2-polyprenyl-3-methyl-5-hydroxy-6-metoxy-1,4-benzoquinol methylase	Match
A8	Ga0222700_1000005	Ga0222700_100000546	48729	47356	outer membrane protein TolC	Match
A8	Ga0222700_1000005	Ga0222700_100000547	50110	48776	putative ATPase	Match
A8	Ga0222700_1000005	Ga0222700_100000548	50767	50111	riboflavin synthase	Match
A8	Ga0222700_1000005	Ga0222700_100000549	51401	50901	peroxiredoxin	Match
A8	Ga0222700_1000005	Ga0222700_100000550	51916	51500	putative oxidoreductase	Match
A8	Ga0222700_1000005	Ga0222700_100000551	53039	51942	diaminohydroxyphosphoribosylaminopyrimidine deaminase/5-amino-6-(5-phosphoribosylamino)uracil reductase	Match
A8	Ga0222700_1000005	Ga0222700_100000552	53578	53042	dCMP deaminase	Match
A8	Ga0222700_1000005	Ga0222700_100000553	53671	55275	predicted ribosome quality control (RQC) complex YloA/Tae2 family protein	Match
A8	Ga0222700_1000005	Ga0222700_100000554	55296	55646	acyl-CoA hydrolase	Match
A8	Ga0222700_1000005	Ga0222700_100000555	56996	55671	lipopolysaccharide export system permease protein	Match
A8	Ga0222700_1000005	Ga0222700_100000556	57180	57108	tRNA_Lys_CTT	Match
A8	Ga0222700_1000005	Ga0222700_100000557	57527	57189	preprotein translocase subunit SecG	Match
A8	Ga0222700_1000005	Ga0222700_100000558	57636	58238	imidazoleglycerol-phosphate dehydratase	Match
A8	Ga0222700_1000005	Ga0222700_100000559	59921	58347	ribonuclease Y	Match
A8	Ga0222700_1000005	Ga0222700_100000560	60491	60228	cell division protein ZapA	Match
A8	Ga0222700_1000005	Ga0222700_100000561	60805	60500	hypothetical protein	Match
A8	Ga0222700_1000005	Ga0222700_100000562	63256	60821	phenylalanyl-tRNA synthetase beta chain	Match
A8	Ga0222700_1000005	Ga0222700_100000563	63377	63306	tRNA_Glu_TTC	Match
A8	Ga0222700_1000005	Ga0222700_100000564	63461	63388	tRNA_His_GTG	Match
A8	Ga0222700_1000005	Ga0222700_100000565	63567	63495	tRNA_Arg_TCT	Match
A8	Ga0222700_1000005	Ga0222700_100000566	63665	63593	tRNA_Pro_TGG	Match
A8	Ga0222700_1000005	Ga0222700_100000567	64178	63774	8-oxo-dGTP pyrophosphatase MutT (NUDIX family)	Partial match
A8	Ga0222700_1000005	Ga0222700_100000568	64433	65410	glucose-1-phosphate thymidylyltransferase	Match
A8	Ga0222700_1000005	Ga0222700_100000569	65662	66876	S-adenosylmethionine synthetase	Match
A8	Ga0222700_1000005	Ga0222700_100000570	66976	68391	adenosylhomocysteinase	Match
A8	Ga0222700_1000005	Ga0222700_100000571	68544	68615	tRNA_Gln_TTG	Match
A8	Ga0222700_1000005	Ga0222700_100000572	68659	69312	phosphoribosylanthranilate isomerase	Match
A8	Ga0222700_1000005	Ga0222700_100000573	70277	69309	pimeloyl-ACP methyl ester carboxylesterase	Match
A8	Ga0222700_1000005	Ga0222700_100000574	72139	70397	CPA2 family monovalent cation:H+ antiporter-2	Match
A8	Ga0222700_1000005	Ga0222700_100000575	72459	74261	SulP family sulfate permease	Match
A8	Ga0222700_1000005	Ga0222700_100000576	74402	74710	hypothetical protein	Match
A8	Ga0222700_1000005	Ga0222700_100000577	74795	75238	predicted DNA-binding protein with PD1-like motif	Match
A8	Ga0222700_1000005	Ga0222700_100000578	75238	75510	hypothetical protein	Match
A8	Ga0222700_1000005	Ga0222700_100000579	76226	75501	hypothetical protein	Match
A8	Ga0222700_1000005	Ga0222700_100000580	79486	76223	exonuclease SbcC	Match
A8	Ga0222700_1000005	Ga0222700_100000581	79926	79483	PD-(D/E)XK nuclease superfamily protein	Partial match
A8	Ga0222700_1000005	Ga0222700_100000582	81193	79916	exonuclease SbcD	No match	DNA recombination and repair
A8	Ga0222700_1000005	Ga0222700_100000583	82026	81244	hypothetical protein	No match	Hypothetical
A8	Ga0222700_1000005	Ga0222700_100000584	82299	82607	transposase	No match	Mobile element
A8	Ga0222700_1000005	Ga0222700_100000585	82993	83190	hypothetical protein	No match	Hypothetical
A8	Ga0222700_1000005	Ga0222700_100000586	83299	84786	RNA-directed DNA polymerase	No match	Transcription regulation
A8	Ga0222700_1000005	Ga0222700_100000587	85490	85966	hypothetical protein	No match	Hypothetical
A8	Ga0222700_1000005	Ga0222700_100000588	86066	87598	Fic family protein	No match	Post-translation modification
A8	Ga0222700_1000005	Ga0222700_100000589	87663	88271	transposase	No match	Mobile element
A8	Ga0222700_1000005	Ga0222700_100000590	89791	88622	Fic family protein	No match	Post-translation modification
A8	Ga0222700_1000005	Ga0222700_100000591	91053	89992	hypothetical protein	No match	Hypothetical
A8	Ga0222700_1000005	Ga0222700_100000592	92009	92101	hypothetical protein	Match
A8	Ga0222700_1000005	Ga0222700_100000593	92673	92110	putative transcriptional regulator	Match
A8	Ga0222700_1000005	Ga0222700_100000594	93153	92683	peroxiredoxin Q/BCP	Match
A8	Ga0222700_1000005	Ga0222700_100000595	93257	93754	ADP-ribose pyrophosphatase YjhB (NUDIX family)	Match
A8	Ga0222700_1000005	Ga0222700_100000596	95062	93761	miniconductance mechanosensitive channel	Match
A8	Ga0222700_1000005	Ga0222700_100000597	96862	95069	two-component system phosphate regulon sensor histidine kinase PhoR	Match
A8	Ga0222700_1000005	Ga0222700_100000598	97562	96852	DNA-binding response OmpR family regulator	Match
A8	Ga0222700_1000005	Ga0222700_100000599	98664	97696	peptide/nickel transport system ATP-binding protein	Match
A8	Ga0222700_1000005	Ga0222700_1000005100	98765	102073	transcription-repair coupling factor (superfamily II helicase)	Match
A8	Ga0222700_1000005	Ga0222700_1000005101	102173	102712	chlorosome envelope protein X	Match
A8	Ga0222700_1000005	Ga0222700_1000005102	102814	103494	chlorosome envelope protein J	Match
A8	Ga0222700_1000005	Ga0222700_1000005103	103546	104766	alanine dehydrogenase	Match
A8	Ga0222700_1000005	Ga0222700_1000005104	106308	104785	prolycopene isomerase	Match
A8	Ga0222700_1000005	Ga0222700_1000005105	106439	107068	RNA polymerase sigma-70 factor (ECF subfamily)	Match
A8	Ga0222700_1000005	Ga0222700_1000005106	107097	107354	predicted anti-sigma-YlaC factor YlaD	Match
A8	Ga0222700_1000005	Ga0222700_1000005107	107506	107898	DNA-binding transcriptional ArsR family regulator	Match
A8	Ga0222700_1000005	Ga0222700_1000005108	108136	110043	molecular chaperone DnaK	Match
A8	Ga0222700_1000005	Ga0222700_1000005109	110158	110592	photosystem P840 reaction center protein PscD	Match
A8	Ga0222700_1000005	Ga0222700_1000005110	111108	110992	hypothetical protein	No match	Hypothetical
A8	Ga0222700_1000005	Ga0222700_1000005111	113246	111147	outer membrane receptor for ferrienterochelin and colicins	No match	Transport
A8	Ga0222700_1000005	Ga0222700_1000005112	114043	113309	NitT/TauT family transport system ATP-binding protein/sulfonate transport system ATP-binding protein	No match	Transport
A8	Ga0222700_1000005	Ga0222700_1000005113	114713	114012	NitT/TauT family transport system permease protein/sulfonate transport system permease protein	No match	Transport
A8	Ga0222700_1000005	Ga0222700_1000005114	115864	114797	ABC-type nitrate/sulfonate/bicarbonate transport system substrate-binding protein	No match	Transport
A8	Ga0222700_1000005	Ga0222700_1000005115	116238	115885	uncharacterized protein DUF2023	Partial match
A8	Ga0222700_1000005	Ga0222700_1000005116	116943	116290	ferritin	Partial match
A8	Ga0222700_1000005	Ga0222700_1000005117	117452	116943	flavodoxin I	No match	Other metabolism
A8	Ga0222700_1000005	Ga0222700_1000005118	117847	117494	hypothetical protein	No match	Hypothetical
A8	Ga0222700_1000005	Ga0222700_1000005119	118143	117907	FeoC-like transcriptional regulator	No match	Transcription regulation
A8	Ga0222700_1000005	Ga0222700_1000005120	120603	118216	ferrous iron transport protein B	No match	Transport
A8	Ga0222700_1000005	Ga0222700_1000005121	120827	120600	ferrous iron transport protein A	No match	Transport
A8	Ga0222700_1000005	Ga0222700_1000005122	121153	120824	ferrous iron transport protein A	No match	Transport
A8	Ga0222700_1000005	Ga0222700_1000005123	122248	121187	hypothetical protein	No match	Hypothetical
A8	Ga0222700_1000005	Ga0222700_1000005124	122581	123555	cytoskeletal protein RodZ	Partial match
A8	Ga0222700_1000005	Ga0222700_1000005125	124470	123565	TolA-binding protein	Partial match
A8	Ga0222700_1000005	Ga0222700_1000005126	124934	124431	peptidoglycan-associated lipoprotein	Match
A8	Ga0222700_1000005	Ga0222700_1000005127	125527	125009	peptidoglycan-associated lipoprotein	Match
A8	Ga0222700_1000005	Ga0222700_1000005128	126842	125532	TolB protein	Match
A8	Ga0222700_1000005	Ga0222700_1000005129	127772	126966	colicin import membrane protein	Match
A8	Ga0222700_1000005	Ga0222700_1000005130	128200	127769	biopolymer transport protein TolR	Match
A8	Ga0222700_1000005	Ga0222700_1000005131	128880	128218	biopolymer transport protein TolQ	Match
A8	Ga0222700_1000005	Ga0222700_1000005132	130485	128908	uncharacterized membrane protein/dolichol kinase	Match
A8	Ga0222700_1000005	Ga0222700_1000005133	130727	130873	hypothetical protein	No match	Hypothetical
A8	Ga0222700_1000005	Ga0222700_1000005134	130876	132573	dihydroxy-acid dehydratase	Match
A8	Ga0222700_1000005	Ga0222700_1000005135	132587	134308	acetolactate synthase-1/2/3 large subunit	Match
A8	Ga0222700_1000005	Ga0222700_1000005136	134319	134795	acetolactate synthase-1/3 small subunit	Match
A8	Ga0222700_1000005	Ga0222700_1000005137	134840	135832	ketol-acid reductoisomerase	Match
A8	Ga0222700_1000005	Ga0222700_1000005138	135854	136915	3-isopropylmalate dehydrogenase	Match
A8	Ga0222700_1000005	Ga0222700_1000005139	136939	138507	2-isopropylmalate synthase	Match
A8	Ga0222700_1000005	Ga0222700_1000005140	138515	139810	3-isopropylmalate/(R)-2-methylmalate dehydratase large subunit	Match
A8	Ga0222700_1000005	Ga0222700_1000005141	139838	140404	3-isopropylmalate/(R)-2-methylmalate dehydratase small subunit	Match
A8	Ga0222700_1000005	Ga0222700_1000005142	140412	142022	2-isopropylmalate synthase	Match
A8	Ga0222700_1000005	Ga0222700_1000005143	142217	142888	DNA repair protein RadC	Match
A8	Ga0222700_1000005	Ga0222700_1000005144	143173	142916	CspA family cold shock protein	Match
A8	Ga0222700_1000005	Ga0222700_1000005145	143374	144105	sepiapterin reductase	Match
A8	Ga0222700_1000005	Ga0222700_1000005146	144213	144671	hypothetical protein	Match
A8	Ga0222700_1000005	Ga0222700_1000005147	144690	145985	seryl-tRNA synthetase	Match
A8	Ga0222700_1000005	Ga0222700_1000005148	147030	145966	homoserine O-acetyltransferase	Match
A8	Ga0222700_1000005	Ga0222700_1000005149	148517	147027	O-acetylhomoserine (thiol)-lyase	Match
A8	Ga0222700_1000005	Ga0222700_1000005150	148639	149976	16S rRNA (cytosine967-C5)-methyltransferase	Match
A8	Ga0222700_1000005	Ga0222700_1000005151	149985	150899	integrase/recombinase XerD	Match
A8	Ga0222700_1000005	Ga0222700_1000005152	151373	150918	uncharacterized protein DUF2721	Match
A8	Ga0222700_1000005	Ga0222700_1000005153	152813	151419	metallo-beta-lactamase family protein	Match
A8	Ga0222700_1000005	Ga0222700_1000005154	154647	152851	ATP-dependent RNA helicase DeaD	Match
A8	Ga0222700_1000005	Ga0222700_1000005155	154663	154968	hypothetical protein	Match
A8	Ga0222700_1000005	Ga0222700_1000005156	154980	156275	3-deoxy-D-manno-octulosonic-acid transferase	Partial match
A8	Ga0222700_1000005	Ga0222700_1000005157	157529	156288	DNA-binding CsgD family transcriptional regulator	Partial match
A8	Ga0222700_1000005	Ga0222700_1000005158	157719	158174	Fur family peroxide stress response transcriptional regulator	Match
A8	Ga0222700_1000005	Ga0222700_1000005159	158759	158259	rubrerythrin	Match
A8	Ga0222700_1000005	Ga0222700_1000005160	159511	158987	bacterioferritin	Partial match
A8	Ga0222700_1000005	Ga0222700_1000005161	160365	159607	peroxiredoxin (alkyl hydroperoxide reductase subunit C)	Match
A8	Ga0222700_1000005	Ga0222700_1000005162	160509	160973	uncharacterized protein DUF4293	Match
A8	Ga0222700_1000005	Ga0222700_1000005163	160977	161993	4-hydroxythreonine-4-phosphate dehydrogenase	Match
A8	Ga0222700_1000005	Ga0222700_1000005164	161990	162691	cell division transport system ATP-binding protein	Match
A8	Ga0222700_1000005	Ga0222700_1000005165	166137	162688	ribonucleoside-diphosphate reductase alpha chain	Match
A8	Ga0222700_1000005	Ga0222700_1000005166	167459	166536	quinolinate synthase	Partial match
A8	Ga0222700_1000005	Ga0222700_1000005167	167878	167489	co-chaperonin GroES (HSP10)	Match
A8	Ga0222700_1000005	Ga0222700_1000005168	167966	168808	rod shape-determining protein MreC	Match
A8	Ga0222700_1000005	Ga0222700_1000005169	168831	169322	hypothetical protein	Match
A8	Ga0222700_1000005	Ga0222700_1000005170	169327	171231	penicillin-binding protein 2	Match
A8	Ga0222700_1000005	Ga0222700_1000005171	171221	172708	D-lactate dehydrogenase (cytochrome)	Match
A8	Ga0222700_1000005	Ga0222700_1000005172	172717	173190	SsrA-binding protein	Match
A8	Ga0222700_1000005	Ga0222700_1000005173	173211	174428	tyrosyl-tRNA synthetase	Match
A8	Ga0222700_1000005	Ga0222700_1000005174	174548	175093	arginine decarboxylase	Match
A8	Ga0222700_1000005	Ga0222700_1000005175	175349	176944	aspartate oxidase/flavin-dependent dehydrogenase	Match
A8	Ga0222700_1000005	Ga0222700_1000005176	177779	176946	NAD+ synthase	Match
A8	Ga0222700_1000005	Ga0222700_1000005177	178337	177795	hypothetical protein	Match
A8	Ga0222700_1000005	Ga0222700_1000005178	179736	178354	septal ring factor EnvC (AmiA/AmiB activator)	Match
A8	Ga0222700_1000005	Ga0222700_1000005179	179879	181153	UDP-N-acetylglucosamine 1-carboxyvinyltransferase	Match
A8	Ga0222700_1000005	Ga0222700_1000005180	181241	181314	tRNA_Met_CAT	Match
A8	Ga0222700_1000005	Ga0222700_1000005181	181351	181424	tRNA_Glu_CTC	Match
A8	Ga0222700_1000005	Ga0222700_1000005182	181465	181538	tRNA_Arg_ACG	Match
A8	Ga0222700_1000005	Ga0222700_1000005183	181552	181623	tRNA_Gln_CTG	Match
A8	Ga0222700_1000005	Ga0222700_1000005184	181794	182207	winged helix-turn helix protein	No match	Transcription regulation
A9	Ga0222700_1000002	Ga0222700_10000021	3	224	homeodomain-containing protein	No match	Transcritption regulation
A9	Ga0222700_1000002	Ga0222700_10000022	260	610	hypothetical protein	No match	Hypothetical
A9	Ga0222700_1000002	Ga0222700_10000023	570	794	type III restriction enzyme	No match	Cell defence
A9	Ga0222700_1000002	Ga0222700_10000024	826	1539	type III restriction enzyme	No match	Cell defence
A9	Ga0222700_1000002	Ga0222700_10000025	1612	1749	hypothetical protein	No match	Hypothetical
A9	Ga0222700_1000002	Ga0222700_10000026	2160	1963	phosphoserine phosphatase	Match
A9	Ga0222700_1000002	Ga0222700_10000027	4876	2306	aconitate hydratase 2/2-methylisocitrate dehydratase	Match
A9	Ga0222700_1000002	Ga0222700_10000028	6094	5069	S-adenosylmethionine:tRNA ribosyltransferase-isomerase	Match
A9	Ga0222700_1000002	Ga0222700_10000029	7539	6091	histidinol dehydrogenase	Partial match
A9	Ga0222700_1000002	Ga0222700_100000210	7646	8674	rod shape-determining protein MreB	Match
A9	Ga0222700_1000002	Ga0222700_100000211	9881	8751	glycosyltransferase involved in cell wall biosynthesis	Match
A9	Ga0222700_1000002	Ga0222700_100000212	10028	11407	divalent metal cation (Fe/Co/Zn/Cd) transporter/divalent metal cation (Fe/Co/Zn/Cd) transporter/divalent metal cation (Fe/Co/Zn/Cd) transporter	Match
A9	Ga0222700_1000002	Ga0222700_100000213	12413	11430	cation:H+ antiporter	Partial match
A9	Ga0222700_1000002	Ga0222700_100000214	12714	12487	hypothetical protein	No match	Hypothetical
A9	Ga0222700_1000002	Ga0222700_100000215	12717	13757	dihydroflavonol-4-reductase	Partial match
A9	Ga0222700_1000002	Ga0222700_100000216	14792	13767	hypothetical protein	Match
A9	Ga0222700_1000002	Ga0222700_100000217	15613	14810	tryptophan synthase alpha chain	Match
A9	Ga0222700_1000002	Ga0222700_100000218	16319	15627	membrane protease YdiL (CAAX protease family)	Match
A9	Ga0222700_1000002	Ga0222700_100000219	17053	16370	7-cyano-7-deazaguanine synthase	Match
A9	Ga0222700_1000002	Ga0222700_100000220	18803	17160	chaperonin GroEL	Match
A9	Ga0222700_1000002	Ga0222700_100000221	19139	18852	chaperonin GroES	Match
A9	Ga0222700_1000002	Ga0222700_100000222	19299	19604	hypothetical protein	Match
A9	Ga0222700_1000002	Ga0222700_100000223	22478	19614	excinuclease ABC subunit A	Match
A9	Ga0222700_1000002	Ga0222700_100000224	22914	22501	DNA-binding IscR family transcriptional regulator	Match
A9	Ga0222700_1000002	Ga0222700_100000225	23082	23951	pimeloyl-ACP methyl ester carboxylesterase	Match
A9	Ga0222700_1000002	Ga0222700_100000226	26713	23960	lipopolysaccharide assembly outer membrane protein LptD (OstA)	Partial match
A9	Ga0222700_1000002	Ga0222700_100000227	26848	28047	tryptophan synthase beta chain	Match
A9	Ga0222700_1000002	Ga0222700_100000228	28154	28226	tRNA_Gly_GCC	Match
A9	Ga0222700_1000002	Ga0222700_100000229	28312	29463	ABC-type amino acid transport substrate-binding protein	Match
A9	Ga0222700_1000002	Ga0222700_100000230	29541	29627	tRNA_Ser_CGA	Match
A9	Ga0222700_1000002	Ga0222700_100000231	31033	30239	hypothetical protein	No match	Hypothetical
A9	Ga0222700_1000002	Ga0222700_100000232	31135	31863	GMP synthase-like glutamine amidotransferase	Partial match
A9	Ga0222700_1000002	Ga0222700_100000233	31860	33218	deoxyribodipyrimidine photo-lyase	Match
A9	Ga0222700_1000002	Ga0222700_100000234	35599	33215	ribonuclease R	Match
A9	Ga0222700_1000002	Ga0222700_100000235	37528	35687	thiol:disulfide interchange protein DsbD	Match
A9	Ga0222700_1000002	Ga0222700_100000236	37669	37983	quercetin dioxygenase-like cupin family protein	Partial match
A9	Ga0222700_1000002	Ga0222700_100000237	38479	38066	hypothetical protein	No match	Hypothetical
A9	Ga0222700_1000002	Ga0222700_100000238	39249	39097	hypothetical protein	No match	Hypothetical
A9	Ga0222700_1000002	Ga0222700_100000239	40317	39298	DDE family transposase/transposase-like protein DUF772	No match	Mobile element
A9	Ga0222700_1000002	Ga0222700_100000240	40323	40616	hypothetical protein	No match	Hypothetical
A9	Ga0222700_1000002	Ga0222700_100000241	40771	40634	integrase-like protein	No match	Mobile element
A9	Ga0222700_1000002	Ga0222700_100000242	41005	40932	tRNA_Val_GAC	Match
A9	Ga0222700_1000002	Ga0222700_100000243	42396	41080	ATP-dependent Clp protease ATP-binding subunit ClpX	Match
A9	Ga0222700_1000002	Ga0222700_100000244	42717	42445	uncharacterized protein DUF4404	Match
A9	Ga0222700_1000002	Ga0222700_100000245	44270	42792	NADPH-dependent glutamate synthase beta subunit-like oxidoreductase/phytoene dehydrogenase-like protein	Match
A9	Ga0222700_1000002	Ga0222700_100000246	48923	44322	glutamate synthase domain-containing protein 2/glutamate synthase domain-containing protein 1/glutamate synthase domain-containing protein 3	Match
A9	Ga0222700_1000002	Ga0222700_100000247	49778	49035	2,3-bisphosphoglycerate-dependent phosphoglycerate mutase	Match
A9	Ga0222700_1000002	Ga0222700_100000248	50094	51353	NAD(P)H-dependent flavin oxidoreductase YrpB (nitropropane dioxygenase family)	Match
A9	Ga0222700_1000002	Ga0222700_100000249	51447	52448	hypothetical protein	Match
A9	Ga0222700_1000002	Ga0222700_100000250	52945	52445	tRNA(adenine34) deaminase	Match
A9	Ga0222700_1000002	Ga0222700_100000251	53119	54294	succinyl-CoA synthetase beta subunit	Match
A9	Ga0222700_1000002	Ga0222700_100000252	56655	54670	macrolide transport system ATP-binding/permease protein	Match
A9	Ga0222700_1000002	Ga0222700_100000253	57626	56652	macrolide-specific efflux system membrane fusion protein	Match
A9	Ga0222700_1000002	Ga0222700_100000254	58890	57610	outer membrane protein TolC	Match
A9	Ga0222700_1000002	Ga0222700_100000255	59151	61109	ATP-binding cassette subfamily F protein 3	Match
A9	Ga0222700_1000002	Ga0222700_100000256	61197	62141	aspartate carbamoyltransferase catalytic subunit	Partial match
A9	Ga0222700_1000002	Ga0222700_100000257	62176	63060	uncharacterized protein DUF1207	No match	Hypothetical
A9	Ga0222700_1000002	Ga0222700_100000258	63723	63136	8-oxo-dGTP diphosphatase	No match	Other metabolism
A9	Ga0222700_1000002	Ga0222700_100000259	63964	65058	hypothetical protein	No match	Hypothetical
A9	Ga0222700_1000002	Ga0222700_100000260	65211	65468	uncharacterized membrane protein	Match
A9	Ga0222700_1000002	Ga0222700_100000261	65518	67290	cation/acetate symporter	Match
A9	Ga0222700_1000002	Ga0222700_100000262	67408	69288	excinuclease ABC subunit C	Match
A9	Ga0222700_1000002	Ga0222700_100000263	69405	70802	tetratricopeptide (TPR) repeat protein	Match
A9	Ga0222700_1000002	Ga0222700_100000264	70799	71686	shikimate dehydrogenase	Match
A9	Ga0222700_1000002	Ga0222700_100000265	71723	72232	signal peptidase II	Match
A9	Ga0222700_1000002	Ga0222700_100000266	72222	72995	TatD DNase family protein	Match
A9	Ga0222700_1000002	Ga0222700_100000267	73115	73789	tetratricopeptide (TPR) repeat protein	Match
A9	Ga0222700_1000002	Ga0222700_100000268	73821	74312	peptidylprolyl isomerase	Match
A9	Ga0222700_1000002	Ga0222700_100000269	74319	75017	hypothetical protein	Match
A9	Ga0222700_1000002	Ga0222700_100000270	75129	75950	purine-nucleoside phosphorylase	Match
A9	Ga0222700_1000002	Ga0222700_100000271	75969	77036	methylthioribose-1-phosphate isomerase	Match
A9	Ga0222700_1000002	Ga0222700_100000272	77192	78547	cytochrome d ubiquinol oxidase subunit I	Match
A9	Ga0222700_1000002	Ga0222700_100000273	78566	79579	cytochrome d ubiquinol oxidase subunit II	Match
A9	Ga0222700_1000002	Ga0222700_100000274	79619	81358	ATP-binding cassette subfamily C protein CydD	Match
A9	Ga0222700_1000002	Ga0222700_100000275	81355	83076	ATP-binding cassette subfamily C protein CydC	Match
A9	Ga0222700_1000002	Ga0222700_100000276	83130	84167	divinyl chlorophyllide a 8-vinyl-reductase	Partial match
A9	Ga0222700_1000002	Ga0222700_100000277	84448	84176	hypothetical protein	No match	Hypothetical
A9	Ga0222700_1000002	Ga0222700_100000278	85030	84473	apolipoprotein D and lipocalin family protein	No match	Transport
A9	Ga0222700_1000002	Ga0222700_100000279	85982	85104	formyltetrahydrofolate deformylase	Match
A9	Ga0222700_1000002	Ga0222700_100000280	86076	86687	membrane-associated phospholipid phosphatase	Match
A9	Ga0222700_1000002	Ga0222700_100000281	86680	88227	4-amino-4-deoxy-L-arabinose transferase-like glycosyltransferase	Match
A9	Ga0222700_1000002	Ga0222700_100000282	88238	89170	glycosyltransferase involved in cell wall biosynthesis	Match
A9	Ga0222700_1000002	Ga0222700_100000283	89115	90053	hypothetical protein	Partial match
A9	Ga0222700_1000002	Ga0222700_100000284	91798	90074	single-stranded-DNA-specific exonuclease	Partial match
A9	Ga0222700_1000002	Ga0222700_100000285	91978	92979	fructose-1,6-bisphosphatase I	Match
A9	Ga0222700_1000002	Ga0222700_100000286	93912	93043	hypothetical protein	Match
A9	Ga0222700_1000002	Ga0222700_100000287	96263	94038	isocitrate dehydrogenase	Match
A9	Ga0222700_1000002	Ga0222700_100000288	97438	96557	enoyl-[acyl-carrier protein] reductase I	Match
A9	Ga0222700_1000002	Ga0222700_100000289	98886	97585	arsenite-transporting ATPase	Match
A9	Ga0222700_1000002	Ga0222700_100000290	99536	98952	leucyl/phenylalanyl-tRNA--protein transferase	Match
A9	Ga0222700_1000002	Ga0222700_100000291	100148	99570	nitroreductase/nitroreductase	Match
A9	Ga0222700_1000002	Ga0222700_100000292	101203	100172	UDP:flavonoid glycosyltransferase YjiC (YdhE family)	Match
A9	Ga0222700_1000002	Ga0222700_100000293	103362	101242	DNA helicase-2/ATP-dependent DNA helicase PcrA	Match
A9	Ga0222700_1000002	Ga0222700_100000294	103642	105084	glycosidase	Match
A9	Ga0222700_1000002	Ga0222700_100000295	105109	105534	thiamine phosphate synthase YjbQ (UPF0047 family)	Match
A9	Ga0222700_1000002	Ga0222700_100000296	105550	107457	1-deoxy-D-xylulose-5-phosphate synthase	Match
A9	Ga0222700_1000002	Ga0222700_100000297	107933	107436	phosphatidylglycerophosphatase A	Match
A9	Ga0222700_1000002	Ga0222700_100000298	108559	107930	CDP-diacylglycerol--glycerol-3-phosphate 3-phosphatidyltransferase	Match
A9	Ga0222700_1000002	Ga0222700_100000299	111069	108706	DNA mismatch repair protein MutS2	Match
A9	Ga0222700_1000002	Ga0222700_1000002100	111178	111885	pyridoxine 5-phosphate synthase	Match
A9	Ga0222700_1000002	Ga0222700_1000002101	111887	112564	XTP/dITP diphosphohydrolase	Match
A9	Ga0222700_1000002	Ga0222700_1000002102	112580	113428	undecaprenyl-diphosphatase	Match
A9	Ga0222700_1000002	Ga0222700_1000002103	113551	114411	hypothetical protein	Match
A9	Ga0222700_1000002	Ga0222700_1000002104	114515	115309	phospholipid/cholesterol/gamma-HCH transport system permease protein	Match
A9	Ga0222700_1000002	Ga0222700_1000002105	115314	116048	phospholipid/cholesterol/gamma-HCH transport system ATP-binding protein	Match
A9	Ga0222700_1000002	Ga0222700_1000002106	116071	116949	phospholipid/cholesterol/gamma-HCH transport system substrate-binding protein	Match
A9	Ga0222700_1000002	Ga0222700_1000002107	116927	118126	CubicO group peptidase (beta-lactamase class C family)	Match
A9	Ga0222700_1000002	Ga0222700_1000002108	120124	118160	isorenieratene synthase	Match
A9	Ga0222700_1000002	Ga0222700_1000002109	120182	121162	epoxyqueuosine reductase QueG	Partial match
A9	Ga0222700_1000002	Ga0222700_1000002110	121183	121668	hypothetical protein	No match	Hypothetical
A9	Ga0222700_1000002	Ga0222700_1000002111	123359	121785	phosphoribosylaminoimidazolecarboxamide formyltransferase/IMP cyclohydrolase	Match
A9	Ga0222700_1000002	Ga0222700_1000002112	123554	124063	phosphoribosylglycinamide formyltransferase-1	Match
A9	Ga0222700_1000002	Ga0222700_1000002113	124063	124734	7-carboxy-7-deazaguanine synthase	Match
A9	Ga0222700_1000002	Ga0222700_1000002114	124811	125797	dolichol-phosphate mannosyltransferase	Match
A9	Ga0222700_1000002	Ga0222700_1000002115	125794	126639	deoxyribonuclease-4	Match
A9	Ga0222700_1000002	Ga0222700_1000002116	127539	126655	cell division transport system permease protein	Match
A9	Ga0222700_1000002	Ga0222700_1000002117	127654	127726	tRNA_Ala_GGC	Match
A9	Ga0222700_1000002	Ga0222700_1000002118	127892	129385	amidophosphoribosyltransferase	Match
A9	Ga0222700_1000002	Ga0222700_1000002119	129913	129476	RNA polymerase-binding transcription factor DksA	Match
A9	Ga0222700_1000002	Ga0222700_1000002120	133238	129981	isoleucyl-tRNA synthetase	Match
A9	Ga0222700_1000002	Ga0222700_1000002121	133625	133398	hypothetical protein	Match
A9	Ga0222700_1000002	Ga0222700_1000002122	135140	133710	mannose-1-phosphate guanylyltransferase/mannose-6-phosphate isomerase	Match
A9	Ga0222700_1000002	Ga0222700_1000002123	136105	135137	UDP-glucose 4-epimerase	Match
A9	Ga0222700_1000002	Ga0222700_1000002124	137176	136124	dTDP-glucose 4,6-dehydratase	Match
A9	Ga0222700_1000002	Ga0222700_1000002125	138049	137189	dTDP-4-dehydrorhamnose reductase	Match
A9	Ga0222700_1000002	Ga0222700_1000002126	138630	138046	dTDP-4-dehydrorhamnose 3,5-epimerase	Match
A9	Ga0222700_1000002	Ga0222700_1000002127	139568	138690	glucose-1-phosphate thymidylyltransferase	Match
A9	Ga0222700_1000002	Ga0222700_1000002128	140095	139619	HEPN domain-containing protein	Partial match
A9	Ga0222700_1000002	Ga0222700_1000002129	140583	140089	lipopolysaccharide assembly protein	Match
A9	Ga0222700_1000002	Ga0222700_1000002130	141428	140604	NAD(P)-dependent dehydrogenase (short-subunit alcohol dehydrogenase family)	Match
A9	Ga0222700_1000002	Ga0222700_1000002131	142725	141415	ribulose-bisphosphate carboxylase large chain	Match
A9	Ga0222700_1000002	Ga0222700_1000002132	143698	142817	putative autoinducer-2 (AI-2) aldolase	Match
A9	Ga0222700_1000002	Ga0222700_1000002133	145887	143758	rhamnose utilization protein RhaD (predicted bifunctional aldolase and dehydrogenase)/NAD(P)-dependent dehydrogenase (short-subunit alcohol dehydrogenase family)	Match
A9	Ga0222700_1000002	Ga0222700_1000002134	146185	146697	regulatory protein	Partial match
A9	Ga0222700_1000002	Ga0222700_1000002135	147398	146688	uridylate kinase	Match
A9	Ga0222700_1000002	Ga0222700_1000002136	148335	147466	elongation factor Ts	Match
A9	Ga0222700_1000002	Ga0222700_1000002137	149231	148374	small subunit ribosomal protein S2	Partial match
A9	Ga0222700_1000002	Ga0222700_1000002138	149779	149390	small subunit ribosomal protein S9	Match
A9	Ga0222700_1000002	Ga0222700_1000002139	150249	149800	large subunit ribosomal protein L13	Match
A9	Ga0222700_1000002	Ga0222700_1000002140	150394	151704	GTP-binding protein	Match
A9	Ga0222700_1000002	Ga0222700_1000002141	151748	152887	ATP-binding protein involved in chromosome partitioning	Match
A9	Ga0222700_1000002	Ga0222700_1000002142	153017	153277	Fe-S cluster biogenesis protein NfuA	Match
A9	Ga0222700_1000002	Ga0222700_1000002143	155692	153287	S-DNA-T family DNA segregation ATPase FtsK/SpoIIIE	Match
A9	Ga0222700_1000002	Ga0222700_1000002144	156825	155728	aminomethyltransferase	Match
A9	Ga0222700_1000002	Ga0222700_1000002145	157574	156939	putative membrane protein	Match
A9	Ga0222700_1000002	Ga0222700_1000002146	158262	157603	uncharacterized protein	Match
A9	Ga0222700_1000002	Ga0222700_1000002147	158912	158325	LemA protein	Match
A9	Ga0222700_1000002	Ga0222700_1000002148	161156	158952	GTP pyrophosphokinase	Match
A9	Ga0222700_1000002	Ga0222700_1000002149	163330	161261	excinuclease ABC subunit B	Match
A9	Ga0222700_1000002	Ga0222700_1000002150	163493	166441	predicted Zn-dependent peptidase/predicted Zn-dependent peptidase	Match
A9	Ga0222700_1000002	Ga0222700_1000002151	166451	167533	lipopolysaccharide export system permease protein	Match
A9	Ga0222700_1000002	Ga0222700_1000002152	167538	168344	hypothetical protein	No match	Hypothetical
A9	Ga0222700_1000002	Ga0222700_1000002153	169299	168400	RNA polymerase primary sigma factor	Match
A9	Ga0222700_1000002	Ga0222700_1000002154	172152	169444	valyl-tRNA synthetase	Match
A9	Ga0222700_1000002	Ga0222700_1000002155	172865	172188	ATP-dependent Clp protease protease subunit	Match
A9	Ga0222700_1000002	Ga0222700_1000002156	173430	174077	thymidylate synthase (FAD)	No match	Other metabolism
A9	Ga0222700_1000002	Ga0222700_1000002157	175026	174175	acetyl-CoA carboxylase carboxyl transferase subunit beta	Partial match
A9	Ga0222700_1000002	Ga0222700_1000002158	175207	177927	NTE family protein	Match
A9	Ga0222700_1000002	Ga0222700_1000002159	177945	178724	5'-nucleotidase	Match
A9	Ga0222700_1000002	Ga0222700_1000002160	178729	180420	uncharacterized protein YllA (UPF0747 family)	Match
A9	Ga0222700_1000002	Ga0222700_1000002161	180736	180449	hypothetical protein	Match
A9	Ga0222700_1000002	Ga0222700_1000002162	180805	181242	heme-binding protein	Match
A9	Ga0222700_1000002	Ga0222700_1000002163	181981	181250	hypothetical protein	Match
A9	Ga0222700_1000002	Ga0222700_1000002164	182589	182020	anthranilate synthase component 2	Match
A9	Ga0222700_1000002	Ga0222700_1000002165	183858	182605	NDP-sugar pyrophosphorylase family protein	Match
A9	Ga0222700_1000002	Ga0222700_1000002166	184011	184214	hypothetical protein	Match
A9	Ga0222700_1000002	Ga0222700_1000002167	184436	185506	hypothetical protein	Match
A9	Ga0222700_1000002	Ga0222700_1000002168	186961	185570	succinate-semialdehyde dehydrogenase/glutarate-semialdehyde dehydrogenase	Match
A9	Ga0222700_1000002	Ga0222700_1000002169	188010	187051	ribosome biogenesis GTPase	Match
A9	Ga0222700_1000002	Ga0222700_1000002170	190164	188047	ATP-dependent DNA helicase RecG	Match
A9	Ga0222700_1000002	Ga0222700_1000002171	190269	190496	large subunit ribosomal protein L31	Match
A9	Ga0222700_1000002	Ga0222700_1000002172	190521	191081	ribosome recycling factor	Match
A9	Ga0222700_1000002	Ga0222700_1000002173	192330	191068	nitrogenase molybdenum-iron protein alpha/beta subunit	Match
A9	Ga0222700_1000002	Ga0222700_1000002174	193285	192311	sporulation related protein	Match
A9	Ga0222700_1000002	Ga0222700_1000002175	193417	194625	exodeoxyribonuclease VII large subunit	Match
A9	Ga0222700_1000002	Ga0222700_1000002176	195346	194603	3-deoxy-manno-octulosonate cytidylyltransferase (CMP-KDO synthetase)	Match
A9	Ga0222700_1000002	Ga0222700_1000002177	195673	195377	hypothetical protein	Match
A9	Ga0222700_1000002	Ga0222700_1000002178	195968	195681	aspartyl-tRNA(Asn)/glutamyl-tRNA(Gln) amidotransferase subunit C	Match
A9	Ga0222700_1000002	Ga0222700_1000002179	197344	196001	citrate synthase	Match
A9	Ga0222700_1000002	Ga0222700_1000002180	197512	197586	tRNA_Asp_GTC	Match
A9	Ga0222700_1000002	Ga0222700_1000002181	198378	197635	uncharacterized LabA/DUF88 family protein	Match
A9	Ga0222700_1000002	Ga0222700_1000002182	198611	199216	tetratricopeptide (TPR) repeat protein	Match
A9	Ga0222700_1000002	Ga0222700_1000002183	199226	200686	menaquinone-specific isochorismate synthase	Match
A9	Ga0222700_1000002	Ga0222700_1000002184	200683	202434	2-succinyl-5-enolpyruvyl-6-hydroxy-3-cyclohexene-1-carboxylate synthase	Match
A9	Ga0222700_1000002	Ga0222700_1000002185	202534	203256	uridine kinase	Match
A9	Ga0222700_1000002	Ga0222700_1000002186	203311	204147	2-succinyl-6-hydroxy-2,4-cyclohexadiene-1-carboxylate synthase	Match
A9	Ga0222700_1000002	Ga0222700_1000002187	204144	204965	naphthoate synthase	Match
A9	Ga0222700_1000002	Ga0222700_1000002188	204962	206035	O-succinylbenzoate synthase	Match
A9	Ga0222700_1000002	Ga0222700_1000002189	206023	207438	O-succinylbenzoic acid--CoA ligase	Match
A9	Ga0222700_1000002	Ga0222700_1000002190	207928	207416	hypothetical protein	Match
A9	Ga0222700_1000002	Ga0222700_1000002191	208681	207935	4-hydroxy-tetrahydrodipicolinate reductase	Match
A9	Ga0222700_1000002	Ga0222700_1000002192	209618	208731	ParB family chromosome partitioning protein	Match
A9	Ga0222700_1000002	Ga0222700_1000002193	210443	209646	chromosome partitioning protein	Match
A9	Ga0222700_1000002	Ga0222700_1000002194	210542	211132	DNA-3-methyladenine glycosylase	Match
A9	Ga0222700_1000002	Ga0222700_1000002195	211222	212616	Mg/Co/Ni transporter MgtE	Match
A9	Ga0222700_1000002	Ga0222700_1000002196	212655	214328	flavin-dependent dehydrogenase/ferredoxin-like protein FixX	Match
A9	Ga0222700_1000002	Ga0222700_1000002197	214334	215407	tRNA-specific 2-thiouridylase	Match
A9	Ga0222700_1000002	Ga0222700_1000002198	215421	216083	phospholipase/carboxylesterase	Match
A9	Ga0222700_1000002	Ga0222700_1000002199	216174	219848	5-methyltetrahydrofolate--homocysteine methyltransferase	Match
A9	Ga0222700_1000002	Ga0222700_1000002200	220343	219873	polyketide cyclase/dehydrase/lipid transport protein	Match
A9	Ga0222700_1000002	Ga0222700_1000002201	221298	220348	murein L,D-transpeptidase YcbB/YkuD	Match
A9	Ga0222700_1000002	Ga0222700_1000002202	221918	221295	murein L,D-transpeptidase YcbB/YkuD	Match
A9	Ga0222700_1000002	Ga0222700_1000002203	222599	221928	L,D-transpeptidase-like protein	Match
A9	Ga0222700_1000002	Ga0222700_1000002204	223329	222715	hypothetical protein	Match
A9	Ga0222700_1000002	Ga0222700_1000002205	224003	223359	uncharacterized protein YukJ	Match
A9	Ga0222700_1000002	Ga0222700_1000002206	224133	224927	6-phosphogluconolactonase	Match
A9	Ga0222700_1000002	Ga0222700_1000002207	226342	224918	glucose-6-phosphate 1-dehydrogenase	Match
A9	Ga0222700_1000002	Ga0222700_1000002208	227259	226360	6-phosphogluconate dehydrogenase	Partial match
A9	Ga0222700_1000002	Ga0222700_1000002209	228211	227432	NAD(P)-dependent dehydrogenase (short-subunit alcohol dehydrogenase family)	Match
A9	Ga0222700_1000002	Ga0222700_1000002210	228456	228235	hypothetical protein	Partial match
A9	Ga0222700_1000002	Ga0222700_1000002211	228991	228518	3-vinyl bacteriochlorophyllide hydratase	Match
A9	Ga0222700_1000002	Ga0222700_1000002212	229200	230627	bacteriochlorophyll C8 methyltransferase	Match
A9	Ga0222700_1000002	Ga0222700_1000002213	230647	230763	hypothetical protein	Match
A9	Ga0222700_1000002	Ga0222700_1000002214	230929	231156	chlorosome envelope protein B	Match
A9	Ga0222700_1000002	Ga0222700_1000002215	231307	231561	chlorosome envelope protein E	Match
A9	Ga0222700_1000002	Ga0222700_1000002216	232787	231669	glycosyltransferase involved in cell wall biosynthesis	Match
A9	Ga0222700_1000002	Ga0222700_1000002217	233345	232866	Ala-tRNA(Pro) deacylase	Match
A9	Ga0222700_1000002	Ga0222700_1000002218	234227	233463	NTE family protein	Partial match
A9	Ga0222700_1000002	Ga0222700_1000002219	234319	235086	predicted tellurium resistance membrane protein TerC	Match
A9	Ga0222700_1000002	Ga0222700_1000002220	235897	235097	TrmH family RNA methyltransferase	Match
A9	Ga0222700_1000002	Ga0222700_1000002221	236469	235894	hypothetical protein	Match
A9	Ga0222700_1000002	Ga0222700_1000002222	236531	237781	putative protease	Match
A9	Ga0222700_1000002	Ga0222700_1000002223	238241	237813	peptidylprolyl isomerase	Match
A9	Ga0222700_1000002	Ga0222700_1000002224	239495	238434	small-conductance mechanosensitive channel	Match
A9	Ga0222700_1000002	Ga0222700_1000002225	240693	239500	protoporphyrinogen oxidase	Match
A9	Ga0222700_1000002	Ga0222700_1000002226	241397	240855	carbonic anhydrase/acetyltransferase-like protein (isoleucine patch superfamily)	Match
A9	Ga0222700_1000002	Ga0222700_1000002227	241562	241909	TM2 domain-containing membrane protein YozV	Match
A9	Ga0222700_1000002	Ga0222700_1000002228	241973	242707	lipopolysaccharide export system ATP-binding protein	Match
A9	Ga0222700_1000002	Ga0222700_1000002229	242757	244166	HD superfamily phosphohydrolase	Match
A9	Ga0222700_1000002	Ga0222700_1000002230	244249	244572	gas vesicle protein	Match
A9	Ga0222700_1000002	Ga0222700_1000002231	244576	245355	non-heme chloroperoxidase	Match
A9	Ga0222700_1000002	Ga0222700_1000002232	246665	245364	3-phosphoshikimate 1-carboxyvinyltransferase	Match
A9	Ga0222700_1000002	Ga0222700_1000002233	246924	246742	small subunit ribosomal protein S21	Match
A9	Ga0222700_1000002	Ga0222700_1000002234	247526	246966	hypothetical protein	Match
A9	Ga0222700_1000002	Ga0222700_1000002235	249036	247663	cystathionine beta-synthase/cysteine synthase A	Match
A9	Ga0222700_1000002	Ga0222700_1000002236	249387	250517	alanine racemase	Match
A9	Ga0222700_1000002	Ga0222700_1000002237	250584	251099	competence protein ComEA	Match
A9	Ga0222700_1000002	Ga0222700_1000002238	251099	251956	hypothetical protein	Match
A9	Ga0222700_1000002	Ga0222700_1000002239	252994	251972	aspartate-semialdehyde dehydrogenase	Match
A9	Ga0222700_1000002	Ga0222700_1000002240	254055	252991	tRNA-dihydrouridine synthase B	Match
A9	Ga0222700_1000002	Ga0222700_1000002241	255114	254065	recombination protein RecA	Match
A9	Ga0222700_1000002	Ga0222700_1000002242	256144	255155	dihydroflavonol-4-reductase	Match
A9	Ga0222700_1000002	Ga0222700_1000002243	256341	257576	predicted Zn-dependent peptidase	Match
A9	Ga0222700_1000002	Ga0222700_1000002244	257661	258944	trigger factor	Match
A9	Ga0222700_1000002	Ga0222700_1000002245	259407	259045	holo-[acyl-carrier protein] synthase	Partial match
A9	Ga0222700_1000002	Ga0222700_1000002246	260293	259415	nicotinate-nucleotide pyrophosphorylase (carboxylating)	Match
A9	Ga0222700_1000002	Ga0222700_1000002247	260561	260899	dihydroneopterin aldolase	Match
A9	Ga0222700_1000002	Ga0222700_1000002248	260899	261426	2-amino-4-hydroxy-6-hydroxymethyldihydropteridine diphosphokinase	Match
A9	Ga0222700_1000002	Ga0222700_1000002249	262633	261479	arsenite-transporting ATPase	Match
A9	Ga0222700_1000002	Ga0222700_1000002250	264042	262702	hypothetical protein	Partial match
A9	Ga0222700_1000002	Ga0222700_1000002251	264543	264301	chlorosome envelope protein A	Match
A9	Ga0222700_1000002	Ga0222700_1000002252	265102	264683	chlorosome envelope protein C	Match
A9	Ga0222700_1000002	Ga0222700_1000002253	266444	265245	arsenite-transporting ATPase	Match
A9	Ga0222700_1000002	Ga0222700_1000002254	266644	267435	dihydroorotate dehydrogenase electron transfer subunit	Match
A9	Ga0222700_1000002	Ga0222700_1000002255	267581	268084	single-strand DNA-binding protein	Match
A9	Ga0222700_1000002	Ga0222700_1000002256	268157	269197	DNA polymerase-3 subunit delta	Match
A9	Ga0222700_1000002	Ga0222700_1000002257	271944	269215	hypothetical protein	Match
A9	Ga0222700_1000002	Ga0222700_1000002258	273135	272143	nucleoside-diphosphate-sugar epimerase	Partial match
A9	Ga0222700_1000002	Ga0222700_1000002259	273336	274550	8-amino-7-oxononanoate synthase	Match
A9	Ga0222700_1000002	Ga0222700_1000002260	274760	276835	iron complex outermembrane receptor protein	No match	Transport
A10	Ga0222700_1000006	Ga0222700_10000061	2	616	iron complex outermembrane receptor protein	Partial match
A10	Ga0222700_1000006	Ga0222700_10000062	778	4581	magnesium chelatase subunit H	Match
A10	Ga0222700_1000006	Ga0222700_10000063	4693	5115	hypothetical protein	Partial match
A10	Ga0222700_1000006	Ga0222700_10000064	5211	9062	magnesium chelatase subunit H	Partial match
A10	Ga0222700_1000006	Ga0222700_10000065	9098	9796	magnesium-protoporphyrin O-methyltransferase	Match
A10	Ga0222700_1000006	Ga0222700_10000066	9936	11576	anaerobic magnesium-protoporphyrin IX monomethyl ester cyclase	Match
A10	Ga0222700_1000006	Ga0222700_10000067	12072	11653	HSP20 family protein	Match
A10	Ga0222700_1000006	Ga0222700_10000068	13094	12171	uncharacterized protein DUF4438	Match
A10	Ga0222700_1000006	Ga0222700_10000069	13243	14595	murein DD-endopeptidase MepM/ murein hydrolase activator NlpD	Match
A10	Ga0222700_1000006	Ga0222700_100000610	15078	14602	ribosome-associated protein	Match
A10	Ga0222700_1000006	Ga0222700_100000611	15632	15018	2-haloacid dehalogenase/putative hydrolase of the HAD superfamily	Match
A10	Ga0222700_1000006	Ga0222700_100000612	16017	15808	CspA family cold shock protein	Match
A10	Ga0222700_1000006	Ga0222700_100000613	17167	16208	WD40 repeat protein/WD40 repeat protein	Match
A10	Ga0222700_1000006	Ga0222700_100000614	18434	17286	chlorobactene glucosyltransferase	Match
A10	Ga0222700_1000006	Ga0222700_100000615	19393	18509	ATP phosphoribosyltransferase	Match
A10	Ga0222700_1000006	Ga0222700_100000616	20148	19411	UDP-2,3-diacylglucosamine hydrolase	Match
A10	Ga0222700_1000006	Ga0222700_100000617	20856	20173	dolichol kinase	Match
A10	Ga0222700_1000006	Ga0222700_100000618	21890	20886	bacteriochlorophyll c synthase	Match
A10	Ga0222700_1000006	Ga0222700_100000619	23314	21968	tRNA-2-methylthio-N6-dimethylallyladenosine synthase	Match
A10	Ga0222700_1000006	Ga0222700_100000620	23934	23323	nitrogen fixation NifU-like protein	Match
A10	Ga0222700_1000006	Ga0222700_100000621	25114	23918	cysteine desulfurase	Match
A10	Ga0222700_1000006	Ga0222700_100000622	26074	25145	cysteine synthase A	Match
A10	Ga0222700_1000006	Ga0222700_100000623	26752	26258	hypothetical protein	Partial match
A10	Ga0222700_1000006	Ga0222700_100000624	29118	27046	hypothetical protein	Match
A10	Ga0222700_1000006	Ga0222700_100000625	29343	30731	putative hemolysin	Match
A10	Ga0222700_1000006	Ga0222700_100000626	30728	31174	peroxiredoxin	Match
A10	Ga0222700_1000006	Ga0222700_100000627	31248	31670	nucleoside-diphosphate kinase	Match
A10	Ga0222700_1000006	Ga0222700_100000628	32856	31744	predicted PurR-regulated permease PerM	Match
A10	Ga0222700_1000006	Ga0222700_100000629	33624	32878	16S rRNA (uracil1498-N3)-methyltransferase	Match
A10	Ga0222700_1000006	Ga0222700_100000630	34325	33633	predicted amidophosphoribosyltransferase	Match
A10	Ga0222700_1000006	Ga0222700_100000631	35335	34346	glucokinase	Match
A10	Ga0222700_1000006	Ga0222700_100000632	36153	35356	UDP-N-acetylglucosamine acyltransferase	Match
A10	Ga0222700_1000006	Ga0222700_100000633	38805	36160	uncharacterized protein DUF2723	Match
A10	Ga0222700_1000006	Ga0222700_100000634	39949	38828	oxygen-independent coproporphyrinogen-3 oxidase	Match
A10	Ga0222700_1000006	Ga0222700_100000635	40553	39969	D-glycero-D-manno-heptose 1,7-bisphosphate phosphatase	Match
A10	Ga0222700_1000006	Ga0222700_100000636	42026	40557	starch synthase	Match
A10	Ga0222700_1000006	Ga0222700_100000637	42154	43929	hypothetical protein	Match
A10	Ga0222700_1000006	Ga0222700_100000638	43926	44510	divinyl protochlorophyllide a 8-vinyl-reductase	Match
A10	Ga0222700_1000006	Ga0222700_100000639	45428	44601	light-independent protochlorophyllide reductase subunit L	Match
A10	Ga0222700_1000006	Ga0222700_100000640	47042	45465	light-independent protochlorophyllide reductase subunit B	Match
A10	Ga0222700_1000006	Ga0222700_100000641	48379	47072	light-independent protochlorophyllide reductase subunit N	Match
A10	Ga0222700_1000006	Ga0222700_100000642	48769	48458	uncharacterized protein YqgV (UPF0045/DUF77 family)	Match
A10	Ga0222700_1000006	Ga0222700_100000643	50092	48788	adenylosuccinate synthase	Match
A10	Ga0222700_1000006	Ga0222700_100000644	50865	50287	GTP-binding protein	Match
A10	Ga0222700_1000006	Ga0222700_100000645	50981	52432	cysteinyl-tRNA synthetase	Match
A10	Ga0222700_1000006	Ga0222700_100000646	53608	52448	mannose-1-phosphate guanylyltransferase	Match
A10	Ga0222700_1000006	Ga0222700_100000647	53692	54357	16S rRNA (guanine527-N7)-methyltransferase	Match
A10	Ga0222700_1000006	Ga0222700_100000648	54950	54420	large subunit ribosomal protein L17	Match
A10	Ga0222700_1000006	Ga0222700_100000649	55979	54993	DNA-directed RNA polymerase subunit alpha	Match
A10	Ga0222700_1000006	Ga0222700_100000650	56619	56008	small subunit ribosomal protein S4	Match
A10	Ga0222700_1000006	Ga0222700_100000651	57045	56662	small subunit ribosomal protein S11	Match
A10	Ga0222700_1000006	Ga0222700_100000652	57472	57095	small subunit ribosomal protein S13	Match
A10	Ga0222700_1000006	Ga0222700_100000653	57955	57737	translation initiation factor IF-1	Match
A10	Ga0222700_1000006	Ga0222700_100000654	58789	57992	methionyl aminopeptidase	Match
A10	Ga0222700_1000006	Ga0222700_100000655	60135	58804	preprotein translocase subunit SecY	Match
A10	Ga0222700_1000006	Ga0222700_100000656	60711	60154	large subunit ribosomal protein L15	Match
A10	Ga0222700_1000006	Ga0222700_100000657	60931	60746	large subunit ribosomal protein L30	Match
A10	Ga0222700_1000006	Ga0222700_100000658	61468	60950	small subunit ribosomal protein S5	Match
A10	Ga0222700_1000006	Ga0222700_100000659	61849	61490	large subunit ribosomal protein L18	Match
A10	Ga0222700_1000006	Ga0222700_100000660	62441	61902	large subunit ribosomal protein L6	Match
A10	Ga0222700_1000006	Ga0222700_100000661	62866	62471	small subunit ribosomal protein S8	Match
A10	Ga0222700_1000006	Ga0222700_100000662	63198	62929	small subunit ribosomal protein S14	Match
A10	Ga0222700_1000006	Ga0222700_100000663	63811	63215	large subunit ribosomal protein L5	Match
A10	Ga0222700_1000006	Ga0222700_100000664	64114	63872	large subunit ribosomal protein L24	Match
A10	Ga0222700_1000006	Ga0222700_100000665	64220	64148	tRNA_Gly_TCC	Match
A10	Ga0222700_1000006	Ga0222700_100000666	64602	64234	large subunit ribosomal protein L14	Match
A10	Ga0222700_1000006	Ga0222700_100000667	64947	64645	small subunit ribosomal protein S17	Match
A10	Ga0222700_1000006	Ga0222700_100000668	65187	64981	large subunit ribosomal protein L29	Match
A10	Ga0222700_1000006	Ga0222700_100000669	65640	65221	large subunit ribosomal protein L16	Match
A10	Ga0222700_1000006	Ga0222700_100000670	66440	65685	small subunit ribosomal protein S3	Match
A10	Ga0222700_1000006	Ga0222700_100000671	66817	66458	large subunit ribosomal protein L22	Match
A10	Ga0222700_1000006	Ga0222700_100000672	67145	66849	small subunit ribosomal protein S19	Match
A10	Ga0222700_1000006	Ga0222700_100000673	68024	67185	large subunit ribosomal protein L2	Match
A10	Ga0222700_1000006	Ga0222700_100000674	68368	68057	large subunit ribosomal protein L23	Match
A10	Ga0222700_1000006	Ga0222700_100000675	69026	68400	large subunit ribosomal protein L4	Match
A10	Ga0222700_1000006	Ga0222700_100000676	69676	69047	large subunit ribosomal protein L3	Match
A10	Ga0222700_1000006	Ga0222700_100000677	70012	69701	small subunit ribosomal protein S10	Match
A10	Ga0222700_1000006	Ga0222700_100000678	71277	70096	elongation factor Tu	Match
A10	Ga0222700_1000006	Ga0222700_100000679	73462	71348	elongation factor G	Match
A10	Ga0222700_1000006	Ga0222700_100000680	73969	73502	small subunit ribosomal protein S7	Match
A10	Ga0222700_1000006	Ga0222700_100000681	74395	73997	small subunit ribosomal protein S12	Match
A10	Ga0222700_1000006	Ga0222700_100000682	75898	74573	hypothetical protein	Partial match
A10	Ga0222700_1000006	Ga0222700_100000683	78329	75942	hypothetical protein	Match
A10	Ga0222700_1000006	Ga0222700_100000684	79865	78378	O-antigen/teichoic acid export membrane protein	Match
A10	Ga0222700_1000006	Ga0222700_100000685	81034	79862	glycosyltransferase involved in cell wall biosynthesis	Match
A10	Ga0222700_1000006	Ga0222700_100000686	81575	80991	hypothetical protein	Match
A10	Ga0222700_1000006	Ga0222700_100000687	82423	81572	hypothetical protein	Match
A10	Ga0222700_1000006	Ga0222700_100000688	83544	82420	glycosyltransferase involved in cell wall biosynthesis	Partial match
A10	Ga0222700_1000006	Ga0222700_100000689	83835	83569	phosphocarrier protein	Match
A10	Ga0222700_1000006	Ga0222700_100000690	84334	83822	amino-acid N-acetyltransferase	Match
A10	Ga0222700_1000006	Ga0222700_100000691	85344	84337	GTP-binding protein	Match
A10	Ga0222700_1000006	Ga0222700_100000692	85431	85688	exodeoxyribonuclease VII small subunit	Match
A10	Ga0222700_1000006	Ga0222700_100000693	87138	85696	aspartyl-tRNA(Asn)/glutamyl-tRNA(Gln) amidotransferase subunit B	Match
A10	Ga0222700_1000006	Ga0222700_100000694	87843	87169	lipid-binding SYLF domain-containing protein	Match
A10	Ga0222700_1000006	Ga0222700_100000695	89262	87934	ATP-dependent Clp protease ATP-binding subunit ClpA	Match
A10	Ga0222700_1000006	Ga0222700_100000696	89750	89442	hypothetical protein	Match
A10	Ga0222700_1000006	Ga0222700_100000697	90059	89832	hypothetical protein	Match
A10	Ga0222700_1000006	Ga0222700_100000698	90082	91167	N6-L-threonylcarbamoyladenine synthase	Partial match
A10	Ga0222700_1000006	Ga0222700_100000699	91269	91625	preprotein translocase subunit YajC	Match
A10	Ga0222700_1000006	Ga0222700_1000006100	91635	92744	carbamoyl-phosphate synthase small subunit	Match
A10	Ga0222700_1000006	Ga0222700_1000006101	92751	93893	aspartate aminotransferase-like enzyme	Match
A10	Ga0222700_1000006	Ga0222700_1000006102	94011	94424	cytochrome c5	Match
A10	Ga0222700_1000006	Ga0222700_1000006103	94503	94838	cytochrome c5	Match
A10	Ga0222700_1000006	Ga0222700_1000006104	94956	95210	MtN3 and saliva related transmembrane protein	Match
A10	Ga0222700_1000006	Ga0222700_1000006105	95230	96030	pyrroline-5-carboxylate reductase	Match
A10	Ga0222700_1000006	Ga0222700_1000006106	97272	96049	molybdopterin molybdotransferase	Match
A10	Ga0222700_1000006	Ga0222700_1000006107	98210	97272	molybdenum cofactor biosynthesis enzyme/molybdopterin biosynthesis enzyme MoaB	Match
A10	Ga0222700_1000006	Ga0222700_1000006108	99103	98288	glycerophosphoryl diester phosphodiesterase	Partial match
A10	Ga0222700_1000006	Ga0222700_1000006109	99637	99122	hypothetical protein	Match
A10	Ga0222700_1000006	Ga0222700_1000006110	100083	99778	hypothetical protein	Match
A10	Ga0222700_1000006	Ga0222700_1000006111	100325	100495	uncharacterized membrane protein YqaE (UPF0057 family)	Match
A10	Ga0222700_1000006	Ga0222700_1000006112	100576	101700	molybdopterin-guanine dinucleotide biosynthesis protein A/molybdopterin-guanine dinucleotide biosynthesis protein	Match
A10	Ga0222700_1000006	Ga0222700_1000006113	101697	102152	nucleotide-binding universal stress UspA family protein	Match
A10	Ga0222700_1000006	Ga0222700_1000006114	102960	102136	zinc transport system permease protein	Match
A10	Ga0222700_1000006	Ga0222700_1000006115	103712	102957	zinc transport system ATP-binding protein	Match
A10	Ga0222700_1000006	Ga0222700_1000006116	104590	103709	zinc transport system substrate-binding protein	Match
A10	Ga0222700_1000006	Ga0222700_1000006117	106386	104713	2-isopropylmalate synthase	Match
A10	Ga0222700_1000006	Ga0222700_1000006118	107178	106681	heat shock protein HslJ	Match
A10	Ga0222700_1000006	Ga0222700_1000006119	107387	107175	hypothetical protein	Match
A10	Ga0222700_1000006	Ga0222700_1000006120	107388	107459	tRNA_Asn_GTT	Match
A10	Ga0222700_1000006	Ga0222700_1000006121	107610	108146	uncharacterized protein	Match
A10	Ga0222700_1000006	Ga0222700_1000006122	108175	108366	large subunit ribosomal protein L32	Match
A10	Ga0222700_1000006	Ga0222700_1000006123	108393	109421	glycerol-3-phosphate acyltransferase PlsX	Match
A10	Ga0222700_1000006	Ga0222700_1000006124	109517	110506	3-oxoacyl-[acyl-carrier-protein] synthase-3	Match
A10	Ga0222700_1000006	Ga0222700_1000006125	110476	111468	[acyl-carrier-protein] S-malonyltransferase	Match
A10	Ga0222700_1000006	Ga0222700_1000006126	111487	112224	3-oxoacyl-[acyl-carrier protein] reductase	Match
A10	Ga0222700_1000006	Ga0222700_1000006127	112321	112557	acyl carrier protein	Match
A10	Ga0222700_1000006	Ga0222700_1000006128	112683	113936	3-oxoacyl-[acyl-carrier-protein] synthase II	Match
A10	Ga0222700_1000006	Ga0222700_1000006129	113959	114738	ribonuclease-3	Match
A10	Ga0222700_1000006	Ga0222700_1000006130	114850	116307	glycine cleavage system protein P-like pyridoxal-binding family	Match
A10	Ga0222700_1000006	Ga0222700_1000006131	116392	118182	beta-N-acetylhexosaminidase	Partial match
A10	Ga0222700_1000006	Ga0222700_1000006132	118160	119569	nitrogenase molybdenum-iron protein alpha/beta subunit	Match
A10	Ga0222700_1000006	Ga0222700_1000006133	119826	121826	threonyl-tRNA synthetase	Match
A10	Ga0222700_1000006	Ga0222700_1000006134	121823	122452	translation initiation factor IF-3	Match
A10	Ga0222700_1000006	Ga0222700_1000006135	122495	122692	large subunit ribosomal protein L35	Match
A10	Ga0222700_1000006	Ga0222700_1000006136	122719	123066	large subunit ribosomal protein L20	Match
A10	Ga0222700_1000006	Ga0222700_1000006137	123084	124112	phenylalanyl-tRNA synthetase alpha chain	Match
A10	Ga0222700_1000006	Ga0222700_1000006138	124575	124177	hypothetical protein	Match
A10	Ga0222700_1000006	Ga0222700_1000006139	125153	124698	large subunit ribosomal protein L9	Match
A10	Ga0222700_1000006	Ga0222700_1000006140	125453	125190	small subunit ribosomal protein S18	Match
A10	Ga0222700_1000006	Ga0222700_1000006141	125961	125488	single-strand DNA-binding protein	Match
A10	Ga0222700_1000006	Ga0222700_1000006142	126431	126030	small subunit ribosomal protein S6	Match
A10	Ga0222700_1000006	Ga0222700_1000006143	127623	126625	heptosyltransferase-2	Match
A10	Ga0222700_1000006	Ga0222700_1000006144	128155	127628	uncharacterized protein DUF3856	Match
A10	Ga0222700_1000006	Ga0222700_1000006145	128586	128152	acyl-CoA thioester hydrolase	Match
A10	Ga0222700_1000006	Ga0222700_1000006146	128769	129917	hypothetical protein	Match
A10	Ga0222700_1000006	Ga0222700_1000006147	130109	129960	hypothetical protein	Match
A10	Ga0222700_1000006	Ga0222700_1000006148	130700	130314	DNA-binding response OmpR family regulator	Match
A10	Ga0222700_1000006	Ga0222700_1000006149	131736	130774	ferrochelatase	No match	Other metabolism
A10	Ga0222700_1000006	Ga0222700_1000006150	131950	131842	5S rRNA. Bacterial TSU	Match
A10	Ga0222700_1000006	Ga0222700_1000006151	134974	132067	23S rRNA. Bacterial LSU	Match
A10	Ga0222700_1000006	Ga0222700_1000006152	135188	135116	tRNA_Ala_TGC	Match
A10	Ga0222700_1000006	Ga0222700_1000006153	135306	135233	tRNA_Ile_GAT	Match
A10	Ga0222700_1000006	Ga0222700_1000006154	136975	135471	16S rRNA. Bacterial SSU	Match
A10	Ga0222700_1000006	Ga0222700_1000006155	137311	137168	hypothetical protein	Match
A10	Ga0222700_1000006	Ga0222700_1000006156	138528	137617	small-conductance mechanosensitive channel	Match
A10	Ga0222700_1000006	Ga0222700_1000006157	140375	138573	CTP synthase	Match
A10	Ga0222700_1000006	Ga0222700_1000006158	142913	140430	DNA gyrase subunit A	Match
A10	Ga0222700_1000006	Ga0222700_1000006159	143071	142937	hypothetical protein	Match
A10	Ga0222700_1000006	Ga0222700_1000006160	143451	143038	ribosome-associated protein	Match
A10	Ga0222700_1000006	Ga0222700_1000006161	144208	143531	tRNA threonylcarbamoyladenosine biosynthesis protein TsaB	Match
A10	Ga0222700_1000006	Ga0222700_1000006162	144654	144205	tRNA threonylcarbamoyladenosine biosynthesis protein TsaE	Match
A10	Ga0222700_1000006	Ga0222700_1000006163	145925	144651	uncharacterized protein (DUF1015 family)	Match
A10	Ga0222700_1000006	Ga0222700_1000006164	146690	145944	segregation and condensation protein A	Match
A10	Ga0222700_1000006	Ga0222700_1000006165	147247	146813	hypothetical protein	No match	Hypothetical
A10	Ga0222700_1000006	Ga0222700_1000006166	147474	148034	tetratricopeptide (TPR) repeat protein	Match
A10	Ga0222700_1000006	Ga0222700_1000006167	148964	148038	C1A family cysteine protease	Match
A10	Ga0222700_1000006	Ga0222700_1000006168	149394	149053	nitrogen regulatory protein P-II 1	Match
A10	Ga0222700_1000006	Ga0222700_1000006169	150717	149404	Amt family ammonium transporter	Match
A10	Ga0222700_1000006	Ga0222700_1000006170	151097	151366	RNA recognition motif-containing protein	Match
A10	Ga0222700_1000006	Ga0222700_1000006171	152371	151436	hypothetical protein	Match
A10	Ga0222700_1000006	Ga0222700_1000006172	153007	152648	hypothetical protein	Partial match
A10	Ga0222700_1000006	Ga0222700_1000006173	154851	153007	glucosamine--fructose-6-phosphate aminotransferase (isomerizing)	Match
A10	Ga0222700_1000006	Ga0222700_1000006174	155725	154901	orotidine-5'-phosphate decarboxylase	Match
A10	Ga0222700_1000006	Ga0222700_1000006175	155951	158056	cell division protease FtsH	Match
A10	Ga0222700_1000006	Ga0222700_1000006176	158136	158063	tRNA_Val_TAC	Match
A10	Ga0222700_1000006	Ga0222700_1000006177	158291	159445	1-deoxy-D-xylulose-5-phosphate reductoisomerase	Match
A10	Ga0222700_1000006	Ga0222700_1000006178	159485	160798	regulator of sigma E protease	Match
A10	Ga0222700_1000006	Ga0222700_1000006179	160815	161888	peptide chain release factor 1	Match
A10	Ga0222700_1000006	Ga0222700_1000006180	161937	162548	uncharacterized protein DUF1997	Match
A10	Ga0222700_1000006	Ga0222700_1000006181	162570	163082	nitroreductase	Partial match
A10	Ga0222700_1000006	Ga0222700_1000006182	163166	164359	arsenite-transporting ATPase	No match	Transport
A10	Ga0222700_1000006	Ga0222700_1000006183	165592	164366	sulfide:quinone oxidoreductase	Match
A10	Ga0222700_1000006	Ga0222700_1000006184	165763	166044	hypothetical protein	No match	Hypothetical
A10	Ga0222700_1000006	Ga0222700_1000006185	166088	166534	hypothetical protein	Match
A10	Ga0222700_1000006	Ga0222700_1000006186	166504	167454	hypothetical protein	Match
A10	Ga0222700_1000006	Ga0222700_1000006187	168866	167601	DNA polymerase V	Match
A10	Ga0222700_1000006	Ga0222700_1000006188	169332	168877	DNA polymerase V	Match
A10	Ga0222700_1000006	Ga0222700_1000006189	169526	169338	hypothetical protein	Match
A10	Ga0222700_1000006	Ga0222700_1000006190	169733	170209	hypothetical protein	Match
A10	Ga0222700_1000006	Ga0222700_1000006191	171080	170235	uncharacterized protein DUF4412	Match
A10	Ga0222700_1000006	Ga0222700_1000006192	171614	171258	uncharacterized protein DUF3127	Partial match
A10	Ga0222700_1000006	Ga0222700_1000006193	172018	171716	putative transcriptional regulator	No match	Transcription regulation
A10	Ga0222700_1000006	Ga0222700_1000006194	172391	172011	hypothetical protein	No match	Hypothetical
A10	Ga0222700_1000006	Ga0222700_1000006195	173181	172480	hypothetical protein	Match
A10	Ga0222700_1000006	Ga0222700_1000006196	173251	173874	transcriptional regulator with XRE-family HTH domain	No match	Transcription regulation
A10	Ga0222700_1000006	Ga0222700_1000006197	174179	174763	DNA polymerase-3 subunit epsilon	Match
A10	Ga0222700_1000006	Ga0222700_1000006198	177030	174832	catalase-peroxidase	No match	Stress response
A11	Ga0222700_1000023	Ga0222700_10000231	721	59	hypothetical protein	No match	Hypothetical
A11	Ga0222700_1000023	Ga0222700_10000232	1139	882	integrase	No match	Mobile element
A11	Ga0222700_1000023	Ga0222700_10000233	1970	1155	uncharacterized protein DUF4102	No match	Hypothetical
A11	Ga0222700_1000023	Ga0222700_10000234	2219	2149	tRNA_Cys_GCA	Match
A11	Ga0222700_1000023	Ga0222700_10000235	2394	3641	DNA recombination protein RmuC	Match
A11	Ga0222700_1000023	Ga0222700_10000236	4993	3752	ATP-dependent RNA helicase RhlE	Match
A11	Ga0222700_1000023	Ga0222700_10000237	5871	5020	nucleotide-binding universal stress UspA family protein/nucleotide-binding universal stress UspA family protein	Match
A11	Ga0222700_1000023	Ga0222700_10000238	7377	5887	SulP family sulfate permease	Match
A11	Ga0222700_1000023	Ga0222700_10000239	7637	10861	exodeoxyribonuclease V gamma subunit	Match
A11	Ga0222700_1000023	Ga0222700_100002310	10861	14361	exodeoxyribonuclease V beta subunit	Partial match
A11	Ga0222700_1000023	Ga0222700_100002311	14366	16087	exodeoxyribonuclease V alpha subunit	No match	DNA recombination and repair
A11	Ga0222700_1000023	Ga0222700_100002312	16325	16792	predicted peroxiredoxin	Match
A11	Ga0222700_1000023	Ga0222700_100002313	17448	16858	uncharacterized SAM-binding protein YcdF (DUF218 family)	Match
A11	Ga0222700_1000023	Ga0222700_100002314	17632	19059	uncharacterized membrane protein	Match
A11	Ga0222700_1000023	Ga0222700_100002315	20480	19068	membrane-bound lytic murein transglycosylase F	Match
A11	Ga0222700_1000023	Ga0222700_100002316	21235	20492	cellulose biosynthesis protein BcsQ	Match
A11	Ga0222700_1000023	Ga0222700_100002317	22808	21237	CHAD domain-containing protein	Match
A11	Ga0222700_1000023	Ga0222700_100002318	23069	24115	basic membrane protein A	Match
A11	Ga0222700_1000023	Ga0222700_100002319	24177	25172	dihydroflavonol-4-reductase	Match
A11	Ga0222700_1000023	Ga0222700_100002320	25212	27161	CBS domain-containing protein	Match
A11	Ga0222700_1000023	Ga0222700_100002321	27154	27852	DNA polymerase-3 subunit epsilon	Match
A11	Ga0222700_1000023	Ga0222700_100002322	28733	27870	SAM-dependent methyltransferase	Match
A11	Ga0222700_1000023	Ga0222700_100002323	28937	28743	hypothetical protein	Match
A11	Ga0222700_1000023	Ga0222700_100002324	30400	29081	dihydroorotase	Match
A11	Ga0222700_1000023	Ga0222700_100002325	30798	31391	5-formyltetrahydrofolate cyclo-ligase	No match	Other metabolism
A11	Ga0222700_1000023	Ga0222700_100002326	31407	33566	polyphosphate kinase	Partial match
A11	Ga0222700_1000023	Ga0222700_100002327	33574	34008	ribose 5-phosphate isomerase B	Match
A11	Ga0222700_1000023	Ga0222700_100002328	34089	34682	acetoin utilization protein AcuB	Match
A11	Ga0222700_1000023	Ga0222700_100002329	35403	34687	SOS-response transcriptional repressor LexA	Match
A11	Ga0222700_1000023	Ga0222700_100002330	35626	36849	amidohydrolase/hippurate hydrolase	Match
A11	Ga0222700_1000023	Ga0222700_100002331	37897	36923	fructose-bisphosphate aldolase class II	Match
A11	Ga0222700_1000023	Ga0222700_100002332	38060	40141	carboxyl-terminal processing protease	Match
A11	Ga0222700_1000023	Ga0222700_100002333	40292	40564	RNA recognition motif-containing protein	Match
A11	Ga0222700_1000023	Ga0222700_100002334	40600	40932	hypothetical protein	Partial match
A11	Ga0222700_1000023	Ga0222700_100002335	40988	41077	hypothetical protein	No match	Hypothetical
A12	Ga0222700_1000399	Ga0222700_10003991	648	58	PST family polysaccharide transporter	No match	Transport
A12	Ga0222700_1000399	Ga0222700_10003992	1779	664	GDPmannose 4,6-dehydratase	Partial match
A12	Ga0222700_1000399	Ga0222700_10003993	2760	1792	GDP-L-fucose synthase	Partial match
A12	Ga0222700_1000399	Ga0222700_10003994	3880	2753	UDP-N-acetylmuramyl pentapeptide phosphotransferase/UDP-N-acetylglucosamine-1-phosphate transferase	No match	Other metabolism
A12	Ga0222700_1000399	Ga0222700_10003995	6489	4069	uncharacterized protein involved in exopolysaccharide biosynthesis/Mrp family chromosome partitioning ATPase	No match	Cell wall modification
A12	Ga0222700_1000399	Ga0222700_10003996	7197	6514	protein involved in polysaccharide export with SLBB domain	No match	Transport
A12	Ga0222700_1000399	Ga0222700_10003997	7493	7230	hypothetical protein	No match	Hypothetical
A12	Ga0222700_1000399	Ga0222700_10003998	7768	7520	hypothetical protein	No match	Hypothetical
A12	Ga0222700_1000399	Ga0222700_10003999	8305	7868	hypothetical protein	No match	Hypothetical
A12	Ga0222700_1000399	Ga0222700_100039910	8634	8368	transcriptional regulator with XRE-family HTH domain	No match	Transcription regulation
A13	Ga0222700_1000158	Ga0222700_10001581	3	176	iron complex outermembrane receptor protein/hemoglobin/transferrin/lactoferrin receptor protein/vitamin B12 transporter	No match	Transport
A13	Ga0222700_1000158	Ga0222700_10001582	191	1375	iron complex transport system substrate-binding protein	No match	Transport
A13	Ga0222700_1000158	Ga0222700_10001583	1786	4152	5-methyltetrahydropteroyltriglutamate--homocysteine methyltransferase	No match	Other metabolism
A13	Ga0222700_1000158	Ga0222700_10001584	4543	6693	ribonucleoside-triphosphate reductase	Match
A13	Ga0222700_1000158	Ga0222700_10001585	6690	7394	pyruvate formate lyase activating enzyme	Partial match
A13	Ga0222700_1000158	Ga0222700_10001586	7397	8389	iron complex transport system permease protein	No match	Transport
A13	Ga0222700_1000158	Ga0222700_10001587	8386	9201	iron complex transport system ATP-binding protein	No match	Transport
A13	Ga0222700_1000158	Ga0222700_10001588	9217	10302	iron complex transport system substrate-binding protein	No match	Transport
A13	Ga0222700_1000158	Ga0222700_10001589	10505	13579	type I restriction enzyme R subunit	No match	Cell defence
A14	Ga0222700_1000107	Ga0222700_10001071	3	227	hypothetical protein	No match	Hypothetical
A14	Ga0222700_1000107	Ga0222700_10001072	215	1798	predicted amidohydrolase	No match	General function
A14	Ga0222700_1000107	Ga0222700_10001073	1804	2814	sugar phosphate isomerase/epimerase	No match	General function
A14	Ga0222700_1000107	Ga0222700_10001074	2838	3845	uncharacterized protein	No match	Hypothetical
A14	Ga0222700_1000107	Ga0222700_10001075	3842	7618	cobaltochelatase CobN	No match	Cobalamin synthesis
A14	Ga0222700_1000107	Ga0222700_10001076	7615	9330	iron complex outermembrane receptor protein	No match	Transport
A14	Ga0222700_1000107	Ga0222700_10001077	9338	11293	magnesium chelatase subunit D	No match	Other metabolism
A14	Ga0222700_1000107	Ga0222700_10001078	11290	12333	magnesium chelatase subunit I	No match	Other metabolism
A14	Ga0222700_1000107	Ga0222700_10001079	12346	16104	cobaltochelatase CobN	No match	Cobalamin synthesis
A14	Ga0222700_1000107	Ga0222700_100010710	16601	16990	iron complex outermembrane receptor protein/hemoglobin/transferrin/lactoferrin receptor protein/vitamin B12 transporter	No match	Transport
A15	Ga0222700_1000260	Ga0222700_10002601	66	1421	hypothetical protein	No match	Hypothetical
A15	Ga0222700_1000260	Ga0222700_10002602	1442	1975	molecular chaperone GrpE	No match	Stress response
A15	Ga0222700_1000260	Ga0222700_10002603	2008	3627	molecular chaperone DnaK (HSP70)	No match	Stress response
A15	Ga0222700_1000260	Ga0222700_10002604	3655	5214	SpoVK/Ycf46/Vps4 family AAA+-type ATPase	No match	Other metabolism
A15	Ga0222700_1000260	Ga0222700_10002605	5211	5996	formylglycine-generating enzyme required for sulfatase activity	No match	Other metabolism
A15	Ga0222700_1000260	Ga0222700_10002606	6101	5916	hypothetical protein	No match	Hypothetical
A15	Ga0222700_1000260	Ga0222700_10002607	6529	7824	iron complex transport system substrate-binding protein	No match	Transport
A15	Ga0222700_1000260	Ga0222700_10002608	7826	8914	iron complex transport system permease protein	No match	Transport
A15	Ga0222700_1000260	Ga0222700_10002609	8914	9996	iron complex transport system ATP-binding protein	No match	Transport
A15	Ga0222700_1000260	Ga0222700_100026010	10012	10953	adenosylcobinamide amidohydrolase	No match	Cobinamide salvaging
A16	Ga0222700_1003121	Ga0222700_10031211	1	1113	threonine dehydrogenase-like Zn-dependent dehydrogenase	No match	General function
A16	Ga0222700_1003121	Ga0222700_10031212	1113	2276	anthranilate phosphoribosyltransferase	No match	Other metabolism
A16	Ga0222700_1003121	Ga0222700_10031213	3128	2652	hypothetical protein	No match	Hypothetical
A17	Ga0222700_1000237	Ga0222700_10002371	1571	444	cobalt-precorrin-5B (C1)-methyltransferase	No match	Cobalamin synthesis
A17	Ga0222700_1000237	Ga0222700_10002372	2365	1565	cobalt-precorrin-5B (C1)-methyltransferase	No match	Cobalamin synthesis
A17	Ga0222700_1000237	Ga0222700_10002373	4232	2337	precorrin-4 methylase/cobalamin biosynthesis protein CbiG	No match	Cobalamin synthesis
A17	Ga0222700_1000237	Ga0222700_10002374	5439	4219	precorrin-6Y C5,15-methyltransferase (decarboxylating)	No match	Cobalamin synthesis
A17	Ga0222700_1000237	Ga0222700_10002375	6841	5432	precorrin-3B methylase/precorrin isomerase	No match	Cobalamin synthesis
A17	Ga0222700_1000237	Ga0222700_10002376	7572	6826	precorrin-2/cobalt-factor-2 C20-methyltransferase	No match	Cobalamin synthesis
A17	Ga0222700_1000237	Ga0222700_10002377	8516	7575	sirohydrochlorin cobaltochelatase	No match	Cobalamin synthesis
A17	Ga0222700_1000237	Ga0222700_10002378	9310	8522	uroporphyrin-III C-methyltransferase	No match	Cobalamin synthesis
A17	Ga0222700_1000237	Ga0222700_10002379	10176	9325	cobalt/nickel transport system ATP-binding protein	No match	Transport
A17	Ga0222700_1000237	Ga0222700_100023710	10961	10170	cobalt/nickel transport system permease protein	No match	Transport
A17	Ga0222700_1000237	Ga0222700_100023711	11272	10958	cobalt/nickel transport protein	No match	Transport
A17	Ga0222700_1000237	Ga0222700_100023712	11416	11276	cobalt/nickel transport system permease protein	No match	Transport
A18	Ga0222700_1000014	Ga0222700_10000141	3	176	hypothetical protein	Partial match
A18	Ga0222700_1000014	Ga0222700_10000142	1226	267	phosphate starvation-inducible protein PhoH	Match
A18	Ga0222700_1000014	Ga0222700_10000143	2237	1239	ADP-L-glycero-D-manno-heptose 6-epimerase	Match
A18	Ga0222700_1000014	Ga0222700_10000144	2793	2359	DNA-directed RNA polymerase specialized sigma24 family protein	Match
A18	Ga0222700_1000014	Ga0222700_10000145	2958	4040	histidinol-phosphate aminotransferase	Match
A18	Ga0222700_1000014	Ga0222700_10000146	4070	4579	tRNA G18 (ribose-2'-O)-methylase SpoU	Match
A18	Ga0222700_1000014	Ga0222700_10000147	4642	5490	pimeloyl-ACP methyl ester carboxylesterase	Match
A18	Ga0222700_1000014	Ga0222700_10000148	6093	5521	PTH1 family peptidyl-tRNA hydrolase	Match
A18	Ga0222700_1000014	Ga0222700_10000149	8256	6175	K(+)-stimulated pyrophosphate-energized sodium pump	Match
A18	Ga0222700_1000014	Ga0222700_100001410	9019	8411	thiosulfate reductase cytochrome b subunit	Match
A18	Ga0222700_1000014	Ga0222700_100001411	10608	9016	cytochrome c/cytochrome c554/c'-like protein	Match
A18	Ga0222700_1000014	Ga0222700_100001412	11775	10750	hypothetical protein	Match
A18	Ga0222700_1000014	Ga0222700_100001413	11882	12268	hypothetical protein	Match
A18	Ga0222700_1000014	Ga0222700_100001414	12370	13080	phosphoribosylaminoimidazole-succinocarboxamide synthase	Match
A18	Ga0222700_1000014	Ga0222700_100001415	13124	13768	membrane protein DedA with SNARE-associated domain	Match
A18	Ga0222700_1000014	Ga0222700_100001416	13858	14769	transketolase	Match
A18	Ga0222700_1000014	Ga0222700_100001417	14785	15321	16S rRNA G966 N2-methylase RsmD	Match
A18	Ga0222700_1000014	Ga0222700_100001418	15335	15847	pantetheine-phosphate adenylyltransferase	Match
A18	Ga0222700_1000014	Ga0222700_100001419	15892	17100	aspartate aminotransferase	Match
A18	Ga0222700_1000014	Ga0222700_100001420	17114	17905	chlorobactene lauroyltransferase	Match
A18	Ga0222700_1000014	Ga0222700_100001421	17931	18881	cell fate regulator YaaT (PSP1 superfamily)	Partial match
A18	Ga0222700_1000014	Ga0222700_100001422	18930	21038	methionyl-tRNA synthetase	Match
A18	Ga0222700_1000014	Ga0222700_100001424	21085	21157	tRNA_Met_CAT	Match
A18	Ga0222700_1000014	Ga0222700_100001423	21268	22443	uncharacterized protein YbbC (DUF1343 family)	Partial match
A18	Ga0222700_1000014	Ga0222700_100001425	23577	22459	cyclopropane-fatty-acyl-phospholipid synthase	Match
A18	Ga0222700_1000014	Ga0222700_100001426	24196	23645	anti-anti-sigma regulatory factor	Match
A18	Ga0222700_1000014	Ga0222700_100001427	25368	24373	putative salt-induced outer membrane protein YdiY	Partial match
A18	Ga0222700_1000014	Ga0222700_100001428	26357	25407	tRNA dimethylallyltransferase	Partial match
A18	Ga0222700_1000014	Ga0222700_100001429	26944	26363	septum formation protein	Match
A18	Ga0222700_1000014	Ga0222700_100001430	28718	26961	Na+/proline symporter	Match
A18	Ga0222700_1000014	Ga0222700_100001431	29693	28782	sugar/nucleoside kinase (ribokinase family)	Match
A18	Ga0222700_1000014	Ga0222700_100001432	31701	29791	glycosidase	Match
A18	Ga0222700_1000014	Ga0222700_100001433	31756	32511	tRNA U38,U39,U40 pseudouridine synthase TruA	Match
A18	Ga0222700_1000014	Ga0222700_100001434	32626	34104	membrane-bound lytic murein transglycosylase D	Partial match
A18	Ga0222700_1000014	Ga0222700_100001435	34249	35439	arsenite-transporting ATPase	Match
A18	Ga0222700_1000014	Ga0222700_100001436	35622	36671	3-deoxy-7-phosphoheptulonate synthase	Match
A18	Ga0222700_1000014	Ga0222700_100001437	36704	36907	hypothetical protein	Match
A18	Ga0222700_1000014	Ga0222700_100001438	36985	38121	hypothetical protein	Match
A18	Ga0222700_1000014	Ga0222700_100001439	38892	38218	hypothetical protein	Match
A18	Ga0222700_1000014	Ga0222700_100001440	39319	38978	nitrogen regulatory protein P-II 1	Match
A18	Ga0222700_1000014	Ga0222700_100001441	40676	39339	Amt family ammonium transporter	Match
A18	Ga0222700_1000014	Ga0222700_100001442	40934	41353	anti-sigma regulatory factor (Ser/Thr protein kinase)	Match
A18	Ga0222700_1000014	Ga0222700_100001443	41295	43028	glucose-6-phosphate isomerase	Match
A18	Ga0222700_1000014	Ga0222700_100001444	44072	43056	thiamine biosynthesis lipoprotein	Match
A18	Ga0222700_1000014	Ga0222700_100001445	44694	44116	electron transport complex protein RnfA	Match
A18	Ga0222700_1000014	Ga0222700_100001446	45296	44694	electron transport complex protein RnfE	Match
A18	Ga0222700_1000014	Ga0222700_100001447	45838	45293	electron transport complex protein RnfG	Match
A18	Ga0222700_1000014	Ga0222700_100001448	46809	45835	electron transport complex protein RnfD	Match
A18	Ga0222700_1000014	Ga0222700_100001449	48153	46828	electron transport complex protein RnfC	Match
A18	Ga0222700_1000014	Ga0222700_100001450	48987	48154	Na+-translocating ferredoxin:NAD+ oxidoreductase RNF subunit RnfB/ferredoxin	Match
A18	Ga0222700_1000014	Ga0222700_100001451	49597	49166	sigma-E factor negative regulatory protein RseC	Match
A18	Ga0222700_1000014	Ga0222700_100001452	50911	49604	adenylosuccinate lyase	Match
A18	Ga0222700_1000014	Ga0222700_100001453	52367	50955	poly(A) polymerase	Match
A18	Ga0222700_1000014	Ga0222700_100001454	53445	52387	predicted dehydrogenase	Match
A18	Ga0222700_1000014	Ga0222700_100001455	54762	53485	MFS family permease/MFS family permease	Match
A18	Ga0222700_1000014	Ga0222700_100001456	55736	54837	iron complex transport system substrate-binding protein	Match
A18	Ga0222700_1000014	Ga0222700_100001457	55815	57515	phosphate:Na+ symporter	Match
A18	Ga0222700_1000014	Ga0222700_100001458	57802	58155	hypothetical protein	Partial match
A18	Ga0222700_1000014	Ga0222700_100001459	58168	58905	cobalt/nickel transport system permease protein	No match	Transport
A19	Ga0222700_1000041	Ga0222700_10000411	2	187	hypothetical protein	No match	Hypothetical
A19	Ga0222700_1000041	Ga0222700_10000412	198	1811	type I restriction enzyme M protein	No match	Cell defence
A19	Ga0222700_1000041	Ga0222700_10000413	4008	1921	hemoglobin/transferrin/lactoferrin receptor protein	No match	Transport
A19	Ga0222700_1000041	Ga0222700_10000414	4990	4895	hypothetical protein	Partial match
A19	Ga0222700_1000041	Ga0222700_10000415	5163	7082	vitamin B12 transporter	No match	Transport
A19	Ga0222700_1000041	Ga0222700_10000416	7283	8818	adenosylcobyric acid synthase	Partial match
A19	Ga0222700_1000041	Ga0222700_10000417	8869	9864	threonine-phosphate decarboxylase	Match
A19	Ga0222700_1000041	Ga0222700_10000418	9857	10819	adenosylcobinamide-phosphate synthase	Match
A19	Ga0222700_1000041	Ga0222700_10000419	10834	11373	cob(I)alamin adenosyltransferase	Match
A19	Ga0222700_1000041	Ga0222700_100004110	11402	12418	iron complex transport system permease protein	Match
A19	Ga0222700_1000041	Ga0222700_100004111	12420	13685	iron complex transport system ATP-binding protein	Match
A19	Ga0222700_1000041	Ga0222700_100004112	13691	14497	sugar phosphate isomerase/epimerase	Match
A19	Ga0222700_1000041	Ga0222700_100004113	14503	15015	adenosylcobinamide kinase/adenosylcobinamide-phosphate guanylyltransferase	Match
A19	Ga0222700_1000041	Ga0222700_100004114	15026	16090	nicotinate-nucleotide--dimethylbenzimidazole phosphoribosyltransferase	Match
A19	Ga0222700_1000041	Ga0222700_100004115	16096	16845	adenosylcobinamide-GDP ribazoletransferase	Match
A19	Ga0222700_1000041	Ga0222700_100004116	16987	17394	ribosomal protein S12 methylthiotransferase accessory factor	Match
A19	Ga0222700_1000041	Ga0222700_100004117	17450	18430	tellurite resistance protein	Match
A19	Ga0222700_1000041	Ga0222700_100004118	18450	18914	hypothetical protein	Match
A19	Ga0222700_1000041	Ga0222700_100004119	19375	18911	hypothetical protein	Match
A19	Ga0222700_1000041	Ga0222700_100004120	19706	19479	hypothetical protein	Match
A19	Ga0222700_1000041	Ga0222700_100004121	19863	20582	putative ABC transport system ATP-binding protein	No match	Transport
A19	Ga0222700_1000041	Ga0222700_100004122	20576	22960	putative ABC transport system permease protein	No match	Transport
A19	Ga0222700_1000041	Ga0222700_100004123	22970	24133	HlyD family secretion protein	No match	Transport
A19	Ga0222700_1000041	Ga0222700_100004124	24142	25470	hypothetical protein	Partial match
A19	Ga0222700_1000041	Ga0222700_100004125	26390	25455	hypothetical protein	Match
A19	Ga0222700_1000041	Ga0222700_100004126	28677	26611	dicarboxylate transport/dicarboxylate transport/dicarboxylate transport	Partial match
A19	Ga0222700_1000041	Ga0222700_100004127	29046	28699	hypothetical protein	Match
A19	Ga0222700_1000041	Ga0222700_100004128	29261	29064	YnbE-like lipoprotein	Match
A19	Ga0222700_1000041	Ga0222700_100004129	29422	29258	hypothetical protein	Partial match
A20	Ga0222700_1000040	Ga0222700_10000401	608	108	uncharacterized protein (DUF2141 family)	Partial match
A20	Ga0222700_1000040	Ga0222700_10000402	1068	601	hypothetical protein	Match
A20	Ga0222700_1000040	Ga0222700_10000403	1208	1822	hypothetical protein	Match
A20	Ga0222700_1000040	Ga0222700_10000404	1946	2254	hypothetical protein	Match
A20	Ga0222700_1000040	Ga0222700_10000405	2355	3953	UDP-N-acetylmuramate dehydrogenase	Match
A20	Ga0222700_1000040	Ga0222700_10000406	4838	3972	NAD(P)H-flavin reductase	Match
A20	Ga0222700_1000040	Ga0222700_10000407	5848	4835	ferredoxin	Match
A20	Ga0222700_1000040	Ga0222700_10000408	6691	5861	ferredoxin	Match
A20	Ga0222700_1000040	Ga0222700_10000409	7151	6702	coenzyme F420-reducing hydrogenase delta subunit	Match
A20	Ga0222700_1000040	Ga0222700_100004010	9159	7189	heterodisulfide reductase subunit A	Match
A20	Ga0222700_1000040	Ga0222700_100004011	10630	9263	heterodisulfide reductase subunit B	Match
A20	Ga0222700_1000040	Ga0222700_100004012	10983	11432	large conductance mechanosensitive channel	Match
A20	Ga0222700_1000040	Ga0222700_100004013	11521	12747	alanine-synthesizing transaminase	Partial match
A20	Ga0222700_1000040	Ga0222700_100004014	14373	12793	NAD(P)H-hydrate repair Nnr-like enzyme with NAD(P)H-hydrate dehydratase domain/NAD(P)H-hydrate repair Nnr-like enzyme with NAD(P)H-hydrate epimerase domain	Partial match
A20	Ga0222700_1000040	Ga0222700_100004015	16719	14377	phosphoribosylformylglycinamidine synthase	Match
A20	Ga0222700_1000040	Ga0222700_100004016	19765	16703	preprotein translocase subunit SecA	Match
A20	Ga0222700_1000040	Ga0222700_100004017	20810	19869	N-glycosylase/DNA lyase	Partial match
A20	Ga0222700_1000040	Ga0222700_100004018	21724	21023	nucleoside-diphosphate-sugar epimerase	Partial match
A20	Ga0222700_1000040	Ga0222700_100004019	22309	21731	hypothetical protein	Match
A20	Ga0222700_1000040	Ga0222700_100004020	23206	22331	lipoic acid synthetase	Match
A20	Ga0222700_1000040	Ga0222700_100004021	23346	23978	AcrR family transcriptional regulator	Match
A20	Ga0222700_1000040	Ga0222700_100004022	24010	24927	HlyD family secretion protein	Match
A20	Ga0222700_1000040	Ga0222700_100004023	24924	25856	ABC-type multidrug transport system ATPase subunit	Match
A20	Ga0222700_1000040	Ga0222700_100004024	25849	26592	ABC-2 type transport system ATP-binding protein	Match
A20	Ga0222700_1000040	Ga0222700_100004025	26589	27704	ABC-2 type transport system permease protein	Match
A20	Ga0222700_1000040	Ga0222700_100004026	27737	28858	ABC-2 type transport system permease protein	Match
A20	Ga0222700_1000040	Ga0222700_100004027	29087	28830	hypothetical protein	Partial match
A20	Ga0222700_1000040	Ga0222700_100004028	29404	29667	hypothetical protein	Partial match
A21	Ga0222700_1000052	Ga0222700_10000521	239	69	DNA repair protein RadC	No match	DNA recombination and repair
A21	Ga0222700_1000052	Ga0222700_10000522	1172	291	F-type H+-transporting ATPase subunit gamma	No match	Transport
A21	Ga0222700_1000052	Ga0222700_10000523	2698	1169	F-type H+-transporting ATPase subunit alpha	No match	Transport
A21	Ga0222700_1000052	Ga0222700_10000524	3476	2667	F-type H+-transporting ATPase subunit b	No match	Transport
A21	Ga0222700_1000052	Ga0222700_10000525	3762	3481	F-type H+-transporting ATPase subunit c	No match	Transport
A21	Ga0222700_1000052	Ga0222700_10000526	4463	3792	F-type H+-transporting ATPase subunit a	No match	Transport
A21	Ga0222700_1000052	Ga0222700_10000527	4743	4465	F1-F0 ATPase (N-ATPase) AtpR subunit	No match	Transport
A21	Ga0222700_1000052	Ga0222700_10000528	5056	4733	ATP synthase protein I	No match	Transport
A21	Ga0222700_1000052	Ga0222700_10000529	5438	5049	F-type H+-transporting ATPase subunit epsilon	No match	Transport
A21	Ga0222700_1000052	Ga0222700_100005210	6834	5428	F-type H+-transporting ATPase subunit beta	No match	Transport
A21	Ga0222700_1000052	Ga0222700_100005211	7133	7375	chlorosome envelope protein B	Match
A21	Ga0222700_1000052	Ga0222700_100005212	9284	7452	ATP-citrate lyase alpha-subunit	Match
A21	Ga0222700_1000052	Ga0222700_100005213	10544	9348	ATP-citrate lyase beta-subunit	Match
A21	Ga0222700_1000052	Ga0222700_100005214	10675	11529	phosphatidylglycerol:prolipoprotein diacylglycerol transferase	Partial match
A21	Ga0222700_1000052	Ga0222700_100005215	12301	11516	putative ABC transport system permease protein	Partial match
A21	Ga0222700_1000052	Ga0222700_100005216	12972	12298	putative ABC transport system ATP-binding protein	Match
A21	Ga0222700_1000052	Ga0222700_100005217	13087	13542	GNAT superfamily N-acetyltransferase	Match
A21	Ga0222700_1000052	Ga0222700_100005218	14825	13557	lipoprotein-releasing system permease protein	Match
A21	Ga0222700_1000052	Ga0222700_100005219	16093	14828	lipoprotein-releasing system permease protein	Match
A21	Ga0222700_1000052	Ga0222700_100005220	17330	16083	PleD family two-component response regulator	Match
A21	Ga0222700_1000052	Ga0222700_100005221	18138	17341	phosphate transport system substrate-binding protein	Match
A21	Ga0222700_1000052	Ga0222700_100005222	18283	19314	N-acetyl-gamma-glutamyl-phosphate reductase	Match
A21	Ga0222700_1000052	Ga0222700_100005223	19292	20626	glutamate N-acetyltransferase/amino-acid N-acetyltransferase	Match
A21	Ga0222700_1000052	Ga0222700_100005224	20629	21570	acetylglutamate kinase	Match
A21	Ga0222700_1000052	Ga0222700_100005225	21584	22591	ornithine carbamoyltransferase	Match
A21	Ga0222700_1000052	Ga0222700_100005226	22588	23034	transcriptional regulator of arginine metabolism	Match
A21	Ga0222700_1000052	Ga0222700_100005227	23053	24255	argininosuccinate synthase	Match
A21	Ga0222700_1000052	Ga0222700_100005228	24276	25724	argininosuccinate lyase	Partial match
A21	Ga0222700_1000052	Ga0222700_100005229	26093	25728	VanZ family protein	Partial match
A22	Ga0222700_1000552	Ga0222700_10005521	809	2278	RNA-directed DNA polymerase	No match	Transcription regulation
A22	Ga0222700_1000552	Ga0222700_10005522	3634	2576	IS5 family transposase	No match	Mobile element
A22	Ga0222700_1000552	Ga0222700_10005523	3995	3768	uncharacterized protein DUF3427	No match	Hypothetical
A22	Ga0222700_1000552	Ga0222700_10005524	4039	4158	hypothetical protein	No match	Hypothetical
A22	Ga0222700_1000552	Ga0222700_10005525	4395	5168	hypothetical protein	No match	Hypothetical
A22	Ga0222700_1000552	Ga0222700_10005526	6725	5175	Fic family protein	No match	Post-translation modification
A22	Ga0222700_1000552	Ga0222700_10005527	6983	7303	transposase	Match
A22	Ga0222700_1000552	Ga0222700_10005528	7296	7418	putative transposase	Match
A23	Ga0222700_1000017	Ga0222700_10000171	1	156	hypothetical protein	No match	Hypothetical
A23	Ga0222700_1000017	Ga0222700_10000172	272	165	hypothetical protein	No match	Hypothetical
A23	Ga0222700_1000017	Ga0222700_10000173	1588	278	alpha-beta hydrolase superfamily lysophospholipase	No match	General function
A23	Ga0222700_1000017	Ga0222700_10000174	2415	2164	hypothetical protein	No match	Hypothetical
A23	Ga0222700_1000017	Ga0222700_10000175	2503	2775	antitoxin ParD1/3/4	No match	Cell defence
A23	Ga0222700_1000017	Ga0222700_10000176	2789	3088	toxin ParE1/3/4	No match	Cell defence
A23	Ga0222700_1000017	Ga0222700_10000177	3089	3190	DNA invertase Pin-like site-specific DNA recombinase	No match	DNA recombination and repair
A23	Ga0222700_1000017	Ga0222700_10000178	3656	5131	hypothetical protein	No match	Hypothetical
A23	Ga0222700_1000017	Ga0222700_10000179	5223	5543	hypothetical protein	No match	Hypothetical
A23	Ga0222700_1000017	Ga0222700_100001710	5595	5849	hypothetical protein	No match	Hypothetical
A23	Ga0222700_1000017	Ga0222700_100001711	5985	7007	fructose-bisphosphate aldolase class I	No match	Other metabolism
A23	Ga0222700_1000017	Ga0222700_100001712	7211	7354	hypothetical protein	No match	Hypothetical
A23	Ga0222700_1000017	Ga0222700_100001713	7994	7515	predicted secreted protein	No match	General function
A23	Ga0222700_1000017	Ga0222700_100001714	9088	8159	putative transposase	Partial match
A23	Ga0222700_1000017	Ga0222700_100001715	9377	9243	transposase-like protein	Match
A23	Ga0222700_1000017	Ga0222700_100001716	9779	10201	hypothetical protein	No match	Hypothetical
A23	Ga0222700_1000017	Ga0222700_100001717	10238	10993	hypothetical protein	No match	Hypothetical
A23	Ga0222700_1000017	Ga0222700_100001718	11006	12328	Ig-like domain-containing protein/uncharacterized protein DUF1566	No match	General function
A23	Ga0222700_1000017	Ga0222700_100001719	12399	12638	23S rRNA-intervening sequence protein	No match	RNA modification
A23	Ga0222700_1000017	Ga0222700_100001720	13017	12676	transposase-like protein DUF772	No match	Mobile element
A23	Ga0222700_1000017	Ga0222700_100001721	13097	13014	hypothetical protein	No match	Hypothetical
A23	Ga0222700_1000017	Ga0222700_100001722	15642	13210	primosomal protein N' (replication factor Y)	Partial match
A23	Ga0222700_1000017	Ga0222700_100001723	16316	15660	adenylate kinase	Match
A23	Ga0222700_1000017	Ga0222700_100001724	17029	16325	hypothetical protein	Match
A23	Ga0222700_1000017	Ga0222700_100001725	18129	17044	23S rRNA (adenine2503-C2)-methyltransferase	Match
A23	Ga0222700_1000017	Ga0222700_100001726	18261	18593	DNA-binding MarR family transcriptional regulator	Match
A23	Ga0222700_1000017	Ga0222700_100001727	18644	19711	phosphoesterase RecJ-like protein	Match
A23	Ga0222700_1000017	Ga0222700_100001728	19747	21252	leucyl aminopeptidase	Match
A23	Ga0222700_1000017	Ga0222700_100001729	21325	22659	UDPglucose 6-dehydrogenase	Match
A23	Ga0222700_1000017	Ga0222700_100001730	23456	22626	hydroxymethylpyrimidine/phosphomethylpyrimidine kinase	Match
A23	Ga0222700_1000017	Ga0222700_100001731	24082	23453	thiamine-phosphate pyrophosphorylase	Match
A23	Ga0222700_1000017	Ga0222700_100001732	24723	24079	thiamine-phosphate pyrophosphorylase	Match
A23	Ga0222700_1000017	Ga0222700_100001733	24821	25306	enamine deaminase RidA (YjgF/YER057c/UK114 family)	Partial match
A23	Ga0222700_1000017	Ga0222700_100001734	26020	27669	carboxyl-terminal processing protease	No match	Other metabolism
A23	Ga0222700_1000017	Ga0222700_100001735	27707	28363	polyketide cyclase/dehydrase/lipid transport protein	No match	Other metabolism
A23	Ga0222700_1000017	Ga0222700_100001736	28402	29019	START domain-containing protein	Match
A23	Ga0222700_1000017	Ga0222700_100001737	30012	29032	bifunctional ADP-heptose synthase (sugar kinase/adenylyltransferase)	Match
A23	Ga0222700_1000017	Ga0222700_100001738	30158	31507	signal recognition particle subunit SRP54	Match
A23	Ga0222700_1000017	Ga0222700_100001739	31558	32217	small subunit ribosomal protein S16	Match
A23	Ga0222700_1000017	Ga0222700_100001740	32249	32755	16S rRNA processing protein RimM	Match
A23	Ga0222700_1000017	Ga0222700_100001741	32770	33477	tRNA (guanine37-N1)-methyltransferase	Match
A23	Ga0222700_1000017	Ga0222700_100001742	33512	33877	large subunit ribosomal protein L19	Match
A23	Ga0222700_1000017	Ga0222700_100001743	33939	34787	A/G-specific adenine glycosylase	Match
A23	Ga0222700_1000017	Ga0222700_100001744	36636	34804	long-chain acyl-CoA synthetase	Match
A23	Ga0222700_1000017	Ga0222700_100001745	36897	37961	uncharacterized membrane protein YbhN (UPF0104 family)	Match
A23	Ga0222700_1000017	Ga0222700_100001746	37958	38914	hypothetical protein	Match
A23	Ga0222700_1000017	Ga0222700_100001747	38907	39623	N-acylneuraminate cytidylyltransferase	Match
A23	Ga0222700_1000017	Ga0222700_100001748	39642	40775	alcohol dehydrogenase	Match
A23	Ga0222700_1000017	Ga0222700_100001749	40801	41958	dTDP-4-amino-4,6-dideoxygalactose transaminase	Match
A23	Ga0222700_1000017	Ga0222700_100001751	42275	42577	hypothetical protein	No match	Hypothetical
A23	Ga0222700_1000017	Ga0222700_100001750	42292	42044	hypothetical protein	No match	Hypothetical
A23	Ga0222700_1000017	Ga0222700_100001752	42586	42969	hypothetical protein	No match	Hypothetical
A23	Ga0222700_1000017	Ga0222700_100001753	43368	44285	restriction system protein	No match	Cell defence
A24	Ga0222700_1000004	Ga0222700_10000041	390	67	CRISPR-associated protein Cas2	No match	Cell defence
A24	Ga0222700_1000004	Ga0222700_10000042	1271	393	CRISPR-associated protein Cas1	No match	Cell defence
A24	Ga0222700_1000004	Ga0222700_10000043	1999	1268	CRISPR system Cascade subunit CasD	No match	Cell defence
A24	Ga0222700_1000004	Ga0222700_10000044	3039	1996	CRISPR system Cascade subunit CasC	No match	Cell defence
A24	Ga0222700_1000004	Ga0222700_10000045	3678	3052	CRISPR system Cascade subunit CasE	No match	Cell defence
A24	Ga0222700_1000004	Ga0222700_10000046	4205	3675	CRISPR system Cascade subunit CasB	No match	Cell defence
A24	Ga0222700_1000004	Ga0222700_10000047	5778	4219	CRISPR system Cascade subunit CasA	No match	Cell defence
A24	Ga0222700_1000004	Ga0222700_10000048	8368	5789	CRISPR-associated endonuclease/helicase Cas3	No match	Cell defence
A24	Ga0222700_1000004	Ga0222700_10000049	8471	8334	hypothetical protein	No match	Hypothetical
A24	Ga0222700_1000004	Ga0222700_100000410	8717	9088	DNA-binding transcriptional ArsR family regulator	Match
A24	Ga0222700_1000004	Ga0222700_100000411	9123	10196	hypothetical protein	Partial match
A24	Ga0222700_1000004	Ga0222700_100000412	10261	11181	O-methyltransferase involved in polyketide biosynthesis	Partial match
A24	Ga0222700_1000004	Ga0222700_100000413	11660	11304	multicomponent Na+:H+ antiporter subunit G	Match
A24	Ga0222700_1000004	Ga0222700_100000414	11929	11657	multicomponent Na+:H+ antiporter subunit F	Match
A24	Ga0222700_1000004	Ga0222700_100000415	12399	11926	multicomponent Na+:H+ antiporter subunit E	Match
A24	Ga0222700_1000004	Ga0222700_100000416	13916	12396	multicomponent Na+:H+ antiporter subunit D	Match
A24	Ga0222700_1000004	Ga0222700_100000417	14278	13913	multicomponent Na+:H+ antiporter subunit C	Match
A24	Ga0222700_1000004	Ga0222700_100000418	14694	14275	multicomponent Na+:H+ antiporter subunit B	Match
A24	Ga0222700_1000004	Ga0222700_100000419	16955	14691	multicomponent Na+:H+ antiporter subunit A	Match
A24	Ga0222700_1000004	Ga0222700_100000420	17470	17042	6-pyruvoyltetrahydropterin/6-carboxytetrahydropterin synthase	No match	Other metabolism
A24	Ga0222700_1000004	Ga0222700_100000421	18186	17569	peptidoglycan L-alanyl-D-glutamate endopeptidase CwlK	No match	Cell wall modification
A24	Ga0222700_1000004	Ga0222700_100000422	18379	19233	serine O-acetyltransferase	Match
A24	Ga0222700_1000004	Ga0222700_100000423	20390	19197	chorismate synthase	Match
A24	Ga0222700_1000004	Ga0222700_100000424	21475	20489	porphobilinogen synthase	Match
A24	Ga0222700_1000004	Ga0222700_100000425	22746	21610	oxaloacetate decarboxylase beta subunit	Match
A24	Ga0222700_1000004	Ga0222700_100000426	23174	22755	biotin carboxyl carrier protein	Match
A24	Ga0222700_1000004	Ga0222700_100000427	23536	23171	Na+-transporting methylmalonyl-CoA/oxaloacetate decarboxylase gamma subunit	Match
A24	Ga0222700_1000004	Ga0222700_100000428	25074	23533	acetyl-CoA carboxylase carboxyltransferase component	Match
A24	Ga0222700_1000004	Ga0222700_100000429	25190	25083	hypothetical protein	Match
A24	Ga0222700_1000004	Ga0222700_100000430	25328	26095	myo-inositol-1(or 4)-monophosphatase	Match
A24	Ga0222700_1000004	Ga0222700_100000431	26842	26096	uroporphyrinogen-III synthase	Match
A24	Ga0222700_1000004	Ga0222700_100000432	27777	26836	hydroxymethylbilane synthase	Match
A24	Ga0222700_1000004	Ga0222700_100000433	29075	27798	glutamyl-tRNA reductase	Match
A24	Ga0222700_1000004	Ga0222700_100000434	30025	29180	ABC-type uncharacterized transport system permease subunit	Match
A24	Ga0222700_1000004	Ga0222700_100000435	30227	32053	predicted membrane GTPase involved in stress response	Match
A24	Ga0222700_1000004	Ga0222700_100000436	33269	32166	nitrogenase subunit NifH/DNA-directed RNA polymerase specialized sigma24 family protein	Match
A24	Ga0222700_1000004	Ga0222700_100000437	34286	33282	threonine dehydrogenase-like Zn-dependent dehydrogenase	Match
A24	Ga0222700_1000004	Ga0222700_100000438	34756	34283	2-vinyl bacteriochlorophyllide hydratase BchF	Match
A24	Ga0222700_1000004	Ga0222700_100000439	36523	34832	peptide/nickel transport system substrate-binding protein	Match
A24	Ga0222700_1000004	Ga0222700_100000440	37272	36520	LmbE family N-acetylglucosaminyl deacetylase	Match
A24	Ga0222700_1000004	Ga0222700_100000441	37341	37787	dUTP pyrophosphatase	Match
A24	Ga0222700_1000004	Ga0222700_100000442	38520	37876	chlorosome envelope protein H	Match
A24	Ga0222700_1000004	Ga0222700_100000443	40028	38625	zeta-carotene desaturase	Partial match
A24	Ga0222700_1000004	Ga0222700_100000444	40265	40086	hypothetical protein	Match
A24	Ga0222700_1000004	Ga0222700_100000445	40548	41072	Lrp/AsnC family leucine-responsive transcriptional regulator	Match
A24	Ga0222700_1000004	Ga0222700_100000446	41135	43303	glutamine synthetase	Match
A24	Ga0222700_1000004	Ga0222700_100000447	43487	44380	pimeloyl-ACP methyl ester carboxylesterase	Partial match
A24	Ga0222700_1000004	Ga0222700_100000448	44485	45000	hypothetical protein	Match
A24	Ga0222700_1000004	Ga0222700_100000449	44993	45802	type III pantothenate kinase	Match
A24	Ga0222700_1000004	Ga0222700_100000450	46877	45780	3-dehydroquinate synthase	Match
A24	Ga0222700_1000004	Ga0222700_100000451	47467	46901	shikimate kinase	Match
A24	Ga0222700_1000004	Ga0222700_100000452	48877	47573	ribosomal protein S12 methylthiotransferase	Match
A24	Ga0222700_1000004	Ga0222700_100000453	50039	48870	queuine tRNA-ribosyltransferase	Partial match
A24	Ga0222700_1000004	Ga0222700_100000454	50925	50107	transglutaminase-like putative cysteine protease	Match
A24	Ga0222700_1000004	Ga0222700_100000455	52028	50922	uncharacterized alpha-E superfamily protein	Match
A24	Ga0222700_1000004	Ga0222700_100000456	53503	52055	uncharacterized circularly permuted ATP-grasp superfamily protein	Match
A24	Ga0222700_1000004	Ga0222700_100000457	53628	54710	UDP-glucuronate 4-epimerase	Match
A24	Ga0222700_1000004	Ga0222700_100000458	55477	54689	hypothetical protein	Match
A24	Ga0222700_1000004	Ga0222700_100000459	55683	55507	hypothetical protein	Match
A24	Ga0222700_1000004	Ga0222700_100000460	55971	55687	hypothetical protein	Match
A24	Ga0222700_1000004	Ga0222700_100000461	57739	56231	lysyl-tRNA synthetase class 2	Partial match
A24	Ga0222700_1000004	Ga0222700_100000462	58736	57804	phytoene synthase	Match
A24	Ga0222700_1000004	Ga0222700_100000463	58894	60219	GTP-binding protein HflX	Match
A24	Ga0222700_1000004	Ga0222700_100000464	60225	60671	ssRNA-specific RNase YbeY (16S rRNA maturation enzyme)	Match
A24	Ga0222700_1000004	Ga0222700_100000465	60668	60859	hypothetical protein	Match
A24	Ga0222700_1000004	Ga0222700_100000466	62143	61343	hypothetical protein	Match
A24	Ga0222700_1000004	Ga0222700_100000467	62383	62302	tRNA_Leu_CAG	Match
A24	Ga0222700_1000004	Ga0222700_100000468	62635	62453	large subunit ribosomal protein L33	Match
A24	Ga0222700_1000004	Ga0222700_100000469	62792	64060	diaminopimelate decarboxylase	Match
A24	Ga0222700_1000004	Ga0222700_100000470	64957	64088	5,10-methylenetetrahydrofolate reductase	Match
A24	Ga0222700_1000004	Ga0222700_100000471	65030	67249	competence protein ComEC	Match
A24	Ga0222700_1000004	Ga0222700_100000472	67502	67230	hypothetical protein	Match
A24	Ga0222700_1000004	Ga0222700_100000473	69009	67600	peptide/nickel transport system permease protein	Match
A24	Ga0222700_1000004	Ga0222700_100000474	69713	69105	large subunit ribosomal protein L25	Match
A24	Ga0222700_1000004	Ga0222700_100000475	70730	69747	ribose-phosphate pyrophosphokinase	Match
A24	Ga0222700_1000004	Ga0222700_100000476	70911	71966	UDP-3-O-[3-hydroxymyristoyl] glucosamine N-acyltransferase	Match
A24	Ga0222700_1000004	Ga0222700_100000477	72376	71981	hypothetical protein	Match
A24	Ga0222700_1000004	Ga0222700_100000478	73215	72523	outer membrane protein OmpA-like peptidoglycan-associated protein	Match
A24	Ga0222700_1000004	Ga0222700_100000479	74621	73386	putative ABC transport system permease protein	Match
A24	Ga0222700_1000004	Ga0222700_100000480	75898	74633	putative ABC transport system permease protein	Match
A24	Ga0222700_1000004	Ga0222700_100000481	76584	75895	putative ABC transport system ATP-binding protein	Match
A24	Ga0222700_1000004	Ga0222700_100000482	77820	76606	HlyD family secretion protein	Match
A24	Ga0222700_1000004	Ga0222700_100000483	79213	77828	outer membrane protein	Match
A24	Ga0222700_1000004	Ga0222700_100000484	79973	79362	hypothetical protein	Match
A24	Ga0222700_1000004	Ga0222700_100000485	81070	79985	D-alanine-D-alanine ligase	Match
A24	Ga0222700_1000004	Ga0222700_100000486	81490	81077	hypothetical protein	Match
A24	Ga0222700_1000004	Ga0222700_100000487	81600	82565	lipoate-protein ligase A	Partial match
A24	Ga0222700_1000004	Ga0222700_100000488	82572	83405	3-methyl-2-oxobutanoate hydroxymethyltransferase	Match
A24	Ga0222700_1000004	Ga0222700_100000489	83438	84238	CDP-diacylglycerol--serine O-phosphatidyltransferase	Match
A24	Ga0222700_1000004	Ga0222700_100000490	84266	84520	phosphoribosylformylglycinamidine synthase	Match
A24	Ga0222700_1000004	Ga0222700_100000491	84535	85230	phosphoribosylformylglycinamidine synthase	Match
A24	Ga0222700_1000004	Ga0222700_100000492	85309	86502	UMF1 family MFS transporter	Match
A24	Ga0222700_1000004	Ga0222700_100000493	86620	88449	DNA polymerase-3 subunit gamma/tau	Partial match
A24	Ga0222700_1000004	Ga0222700_100000494	88590	90410	aspartyl-tRNA synthetase	Partial match
A24	Ga0222700_1000004	Ga0222700_100000495	91847	90438	bacteriochlorophyll C12 methyltransferase	Partial match
A24	Ga0222700_1000004	Ga0222700_100000496	92416	91964	acyl-coenzyme A thioesterase PaaI-like protein	Match
A24	Ga0222700_1000004	Ga0222700_100000497	92536	92464	tRNA_Gly_CCC	Match
A24	Ga0222700_1000004	Ga0222700_100000498	92616	92543	tRNA_Met_CAT	Match
A24	Ga0222700_1000004	Ga0222700_100000499	93405	92674	2-C-methyl-D-erythritol 4-phosphate cytidylyltransferase	Match
A24	Ga0222700_1000004	Ga0222700_1000004100	94450	93410	S-adenosylmethionine:tRNA ribosyltransferase-isomerase	Match
A24	Ga0222700_1000004	Ga0222700_1000004101	97729	94568	trehalose/maltose hydrolase-like predicted phosphorylase/beta-phosphoglucomutase-like phosphatase (HAD superfamily)/cellobiose phosphorylase	Match
A24	Ga0222700_1000004	Ga0222700_1000004102	99028	97766	hypothetical protein	Match
A24	Ga0222700_1000004	Ga0222700_1000004103	99816	99169	dTMP kinase	Match
A24	Ga0222700_1000004	Ga0222700_1000004104	100523	99822	serine 3-dehydrogenase	Partial match
A24	Ga0222700_1000004	Ga0222700_1000004105	102024	100513	APA family basic amino acid/polyamine antiporter	No match	Transport
A24	Ga0222700_1000004	Ga0222700_1000004106	102736	102044	hypothetical protein	No match	Hypothetical
A24	Ga0222700_1000004	Ga0222700_1000004107	102909	103841	regulator of protease activity HflC (stomatin/prohibitin superfamily)	Partial match
A24	Ga0222700_1000004	Ga0222700_1000004108	103853	104311	universal stress protein A	Match
A24	Ga0222700_1000004	Ga0222700_1000004109	105305	104295	LAO/AO transport system kinase	Match
A24	Ga0222700_1000004	Ga0222700_1000004110	107374	105305	methylmalonyl-CoA mutase	Match
A24	Ga0222700_1000004	Ga0222700_1000004111	109149	107371	methylmalonyl-CoA mutase	Match
A24	Ga0222700_1000004	Ga0222700_1000004112	110930	109146	acetyl-CoA carboxylase alpha subunit/acetyl-CoA carboxylase beta subunit	Partial match
A24	Ga0222700_1000004	Ga0222700_1000004113	111343	110933	methylmalonyl-CoA/ethylmalonyl-CoA epimerase	No match	Other metabolism
A24	Ga0222700_1000004	Ga0222700_1000004114	113253	111346	propionyl-CoA synthetase	No match	Other metabolism
A24	Ga0222700_1000004	Ga0222700_1000004115	113406	113266	hypothetical protein	No match	Hypothetical
A24	Ga0222700_1000004	Ga0222700_1000004116	114260	113469	16S rRNA (adenine1518-N6/adenine1519-N6)-dimethyltransferase	Partial match
A24	Ga0222700_1000004	Ga0222700_1000004117	114343	115326	transketolase	Match
A24	Ga0222700_1000004	Ga0222700_1000004118	115337	115690	hypothetical protein	Match
A24	Ga0222700_1000004	Ga0222700_1000004119	115699	116313	recombinational DNA repair protein RecR	Match
A24	Ga0222700_1000004	Ga0222700_1000004120	116372	117763	15-cis-phytoene desaturase	Match
A24	Ga0222700_1000004	Ga0222700_1000004121	117827	117899	tRNA_Arg_CCG	Match
A24	Ga0222700_1000004	Ga0222700_1000004122	117953	118025	tRNA_Pro_CGG	Match
A24	Ga0222700_1000004	Ga0222700_1000004123	118269	118526	hypothetical protein	Match
A24	Ga0222700_1000004	Ga0222700_1000004124	119079	119540	signal transduction histidine kinase	Partial match
A24	Ga0222700_1000004	Ga0222700_1000004125	119705	119556	hypothetical protein	No match	Hypothetical
A24	Ga0222700_1000004	Ga0222700_1000004126	121527	119938	peptide chain release factor 3	Partial match
A24	Ga0222700_1000004	Ga0222700_1000004127	121688	122230	inorganic pyrophosphatase	Match
A24	Ga0222700_1000004	Ga0222700_1000004128	122291	123172	polyphosphate kinase 2 (PPK2 family)	Match
A24	Ga0222700_1000004	Ga0222700_1000004129	123506	124030	3-deoxy-D-manno-octulosonate 8-phosphate phosphatase (KDO 8-P phosphatase)	Match
A24	Ga0222700_1000004	Ga0222700_1000004130	124062	124931	N-acetylneuraminate synthase	Match
A24	Ga0222700_1000004	Ga0222700_1000004131	124969	126873	molecular chaperone HtpG	Match
A24	Ga0222700_1000004	Ga0222700_1000004132	126911	127786	VIT1/CCC1 family predicted Fe2+/Mn2+ transporter	Match
A24	Ga0222700_1000004	Ga0222700_1000004133	129338	127758	hypothetical protein	Match
A24	Ga0222700_1000004	Ga0222700_1000004134	129485	129949	nucleotide-binding universal stress UspA family protein	Match
A24	Ga0222700_1000004	Ga0222700_1000004135	130013	131536	fumarate hydratase class I	Match
A24	Ga0222700_1000004	Ga0222700_1000004136	131602	131880	oxaloacetate decarboxylase gamma subunit	Match
A24	Ga0222700_1000004	Ga0222700_1000004137	131939	133795	pyruvate carboxylase subunit B	Match
A24	Ga0222700_1000004	Ga0222700_1000004138	133900	135435	oxaloacetate decarboxylase beta subunit	Match
A24	Ga0222700_1000004	Ga0222700_1000004139	136735	135530	Leucine-rich repeat (LRR) protein/Leucine-rich repeat (LRR) protein	Match
A24	Ga0222700_1000004	Ga0222700_1000004140	136992	139352	kojibiose phosphorylase	Match
A24	Ga0222700_1000004	Ga0222700_1000004141	139352	140500	glycosyltransferase involved in cell wall biosynthesis	Match
A24	Ga0222700_1000004	Ga0222700_1000004142	140624	144193	DNA polymerase-3 subunit alpha	Match
A24	Ga0222700_1000004	Ga0222700_1000004143	144287	144616	thioredoxin 1	Match
A24	Ga0222700_1000004	Ga0222700_1000004144	144701	145636	thioredoxin reductase (NADPH)	Match
A24	Ga0222700_1000004	Ga0222700_1000004145	145816	146151	hypothetical protein	Match
A24	Ga0222700_1000004	Ga0222700_1000004146	146726	146064	tRNA (guanosine-2'-O-)-methyltransferase	Match
A24	Ga0222700_1000004	Ga0222700_1000004147	147115	148188	UDP-2,3-diacylglucosamine pyrophosphatase LpxH	Match
A24	Ga0222700_1000004	Ga0222700_1000004148	148879	148217	phosphoglycolate phosphatase	Match
A24	Ga0222700_1000004	Ga0222700_1000004149	149565	148876	cyclopropane fatty-acyl-phospholipid synthase-like methyltransferase	Match
A24	Ga0222700_1000004	Ga0222700_1000004150	149749	150552	1-acyl-sn-glycerol-3-phosphate acyltransferase	Match
A24	Ga0222700_1000004	Ga0222700_1000004151	150540	151211	hypothetical protein	Match
A24	Ga0222700_1000004	Ga0222700_1000004152	151265	151525	hypothetical protein	Match
A24	Ga0222700_1000004	Ga0222700_1000004153	151672	152790	putative porin/putative porin	Partial match
A24	Ga0222700_1000004	Ga0222700_1000004154	152967	153794	phosphate transport system substrate-binding protein	Match
A24	Ga0222700_1000004	Ga0222700_1000004155	153907	154719	phosphate transport system substrate-binding protein	Match
A24	Ga0222700_1000004	Ga0222700_1000004156	154882	156045	phosphate transport system permease protein	Match
A24	Ga0222700_1000004	Ga0222700_1000004157	156111	157457	phosphate transport system permease protein	Match
A24	Ga0222700_1000004	Ga0222700_1000004158	157464	158321	phosphate transport system ATP-binding protein	Match
A24	Ga0222700_1000004	Ga0222700_1000004159	158340	159026	phosphate transport system protein	Match
A24	Ga0222700_1000004	Ga0222700_1000004160	159175	159906	phosphate uptake regulator	Match
A24	Ga0222700_1000004	Ga0222700_1000004161	160014	160448	DoxX-like protein	Match
A24	Ga0222700_1000004	Ga0222700_1000004162	160429	161715	hypothetical protein	Match
A24	Ga0222700_1000004	Ga0222700_1000004163	161731	161985	uncharacterized protein YjbI with pentapeptide repeats	Partial match
A24	Ga0222700_1000004	Ga0222700_1000004164	162023	162895	glycosyltransferase involved in cell wall biosynthesis	Match
A24	Ga0222700_1000004	Ga0222700_1000004165	163068	166721	D-lactate dehydrogenase (cytochrome)	Match
A24	Ga0222700_1000004	Ga0222700_1000004166	166790	169468	Ca2+-transporting ATPase	Match
A24	Ga0222700_1000004	Ga0222700_1000004167	169576	169821	hypothetical protein	Partial match
A24	Ga0222700_1000004	Ga0222700_1000004168	169818	170624	putative thioredoxin	Match
A24	Ga0222700_1000004	Ga0222700_1000004169	170636	171214	5'(3')-deoxyribonucleotidase	Partial match
A24	Ga0222700_1000004	Ga0222700_1000004170	172549	171368	23S rRNA (cytosine1962-C5)-methyltransferase	Partial match
A24	Ga0222700_1000004	Ga0222700_1000004171	172609	173505	uncharacterized protein DUF4292	Match
A24	Ga0222700_1000004	Ga0222700_1000004172	174203	173604	Fe-Mn family superoxide dismutase	Match
A24	Ga0222700_1000004	Ga0222700_1000004173	174351	174698	hypothetical protein	Match
A24	Ga0222700_1000004	Ga0222700_1000004174	174695	175363	dephospho-CoA kinase	Match
A24	Ga0222700_1000004	Ga0222700_1000004175	176356	175328	enterochelin esterase-like enzyme	Match
A24	Ga0222700_1000004	Ga0222700_1000004176	177264	176353	sec-independent protein translocase protein TatC	Partial match
A24	Ga0222700_1000004	Ga0222700_1000004177	177500	178474	octaprenyl-diphosphate synthase	Match
A24	Ga0222700_1000004	Ga0222700_1000004178	178520	179254	serine/threonine-protein kinase	Match
A24	Ga0222700_1000004	Ga0222700_1000004179	179448	179275	hypothetical protein	Match
A24	Ga0222700_1000004	Ga0222700_1000004180	179739	179539	hypothetical protein	Partial match
A24	Ga0222700_1000004	Ga0222700_1000004181	179893	181833	CIC family chloride channel protein	Match
A24	Ga0222700_1000004	Ga0222700_1000004182	182885	181860	simple sugar transport system permease protein	Match
A24	Ga0222700_1000004	Ga0222700_1000004183	184438	182897	simple sugar transport system ATP-binding protein	Match
A24	Ga0222700_1000004	Ga0222700_1000004184	185407	184451	threonine dehydrogenase-like Zn-dependent dehydrogenase	Match
A24	Ga0222700_1000004	Ga0222700_1000004185	185781	185440	putative membrane protein	Match
A24	Ga0222700_1000004	Ga0222700_1000004186	187233	185863	DNA repair protein RadA/Sms	Match
A24	Ga0222700_1000004	Ga0222700_1000004187	188125	187238	methylenetetrahydrofolate dehydrogenase (NADP+)/methenyltetrahydrofolate cyclohydrolase	Match
A24	Ga0222700_1000004	Ga0222700_1000004188	188257	188832	uncharacterized protein DUF3109	Match
A24	Ga0222700_1000004	Ga0222700_1000004189	188825	190168	RNA polymerase sigma-54 factor	Match
A24	Ga0222700_1000004	Ga0222700_1000004190	190173	190721	ATP-dependent HslUV protease subunit HslV	Match
A24	Ga0222700_1000004	Ga0222700_1000004191	190761	192239	ATP-dependent HslUV protease ATP-binding subunit HslU	Match
A24	Ga0222700_1000004	Ga0222700_1000004192	192268	192720	3-dehydroquinate dehydratase-2	Match
A24	Ga0222700_1000004	Ga0222700_1000004193	193559	192729	tetratricopeptide (TPR) repeat protein	Match
A24	Ga0222700_1000004	Ga0222700_1000004194	194066	193566	thiosulfate dehydrogenase [quinone] large subunit	Match
A24	Ga0222700_1000004	Ga0222700_1000004195	194631	195869	hypothetical protein	No match	Hypothetical
A24	Ga0222700_1000004	Ga0222700_1000004196	197232	196045	alcohol dehydrogenase	Match
A25	Ga0222700_1000327	Ga0222700_10003271	2	202	hypothetical protein	No match	Hypothetical
A25	Ga0222700_1000327	Ga0222700_10003272	454	2649	exodeoxyribonuclease V alpha subunit	Partial match
A25	Ga0222700_1000327	Ga0222700_10003273	2730	4079	BCD family chlorophyll transporter-like MFS transporter	Match
A25	Ga0222700_1000327	Ga0222700_10003274	4110	5048	wyosine [tRNA(Phe)-imidazoG37] synthetase (radical SAM superfamily)	Match
A25	Ga0222700_1000327	Ga0222700_10003275	5286	5068	hypothetical protein	Match
A25	Ga0222700_1000327	Ga0222700_10003276	5457	6428	carbon starvation protein CstA	Partial match
A25	Ga0222700_1000327	Ga0222700_10003277	6717	6340	uncharacterized protein DUF4282	No match	Hypothetical
A25	Ga0222700_1000327	Ga0222700_10003278	8485	7307	hypothetical protein	No match	Hypothetical
A25	Ga0222700_1000327	Ga0222700_10003279	8788	8558	DNA-binding FrmR family transcriptional regulator	No match	Transcription regulation
A26	Ga0222700_1000059	Ga0222700_10000591	54	260	hypothetical protein	No match	Hypothetical
A26	Ga0222700_1000059	Ga0222700_10000592	353	508	hypothetical protein	No match	Hypothetical
A26	Ga0222700_1000059	Ga0222700_10000593	879	1370	hypothetical protein	No match	Hypothetical
A26	Ga0222700_1000059	Ga0222700_10000594	2704	4158	uncharacterized protein	No match	Hypothetical
A26	Ga0222700_1000059	Ga0222700_10000595	4547	4278	nitrogen fixation uncharacterized protein	No match	General function
A26	Ga0222700_1000059	Ga0222700_10000596	4999	4838	hypothetical protein	No match	Hypothetical
A26	Ga0222700_1000059	Ga0222700_10000597	5498	5220	transcriptional regulator with AbiEi antitoxin domain of type IV toxin-antitoxin system	No match	Cell defence
A26	Ga0222700_1000059	Ga0222700_10000598	5834	7546	phosphomethylpyrimidine synthase	Partial match
A26	Ga0222700_1000059	Ga0222700_10000599	8428	7676	triosephosphate isomerase	Match
A26	Ga0222700_1000059	Ga0222700_100005910	8663	8439	hypothetical protein	Match
A26	Ga0222700_1000059	Ga0222700_100005911	9169	8690	transcription elongation factor GreA	Match
A26	Ga0222700_1000059	Ga0222700_100005912	10877	9387	anthranilate synthase component 1	Match
A26	Ga0222700_1000059	Ga0222700_100005913	10997	11416	hypothetical protein	Match
A26	Ga0222700_1000059	Ga0222700_100005914	12240	11410	signal peptidase I	Match
A26	Ga0222700_1000059	Ga0222700_100005915	14121	12304	GTP-binding protein LepA	Match
A26	Ga0222700_1000059	Ga0222700_100005916	15170	14211	methionyl-tRNA formyltransferase	Partial match
A26	Ga0222700_1000059	Ga0222700_100005917	15733	15161	peptide deformylase	Match
A26	Ga0222700_1000059	Ga0222700_100005918	15942	15775	hypothetical protein	Match
A26	Ga0222700_1000059	Ga0222700_100005919	15966	16469	Fur family ferric uptake transcriptional regulator	Match
A26	Ga0222700_1000059	Ga0222700_100005920	18672	16501	Kef-type K+ transport system membrane component KefB	Match
A26	Ga0222700_1000059	Ga0222700_100005921	18882	19208	small multidrug resistance pump	Match
A26	Ga0222700_1000059	Ga0222700_100005922	19216	20304	glutamate 5-kinase	Match
A26	Ga0222700_1000059	Ga0222700_100005923	20342	20680	uncharacterized Zn ribbon protein	Match
A26	Ga0222700_1000059	Ga0222700_100005924	20705	21973	glutamate-5-semialdehyde dehydrogenase	Match
A26	Ga0222700_1000059	Ga0222700_100005925	21970	22677	lipoprotein-releasing system ATP-binding protein	Match
A26	Ga0222700_1000059	Ga0222700_100005926	22690	24006	MFS family permease/MFS family permease	Partial match
A27	Ga0222700_1000003	Ga0222700_10000031	3872	360	glycosidase	Partial match
A27	Ga0222700_1000003	Ga0222700_10000032	4465	4049	hypothetical protein	Match
A27	Ga0222700_1000003	Ga0222700_10000033	4847	4449	hypothetical protein	Match
A27	Ga0222700_1000003	Ga0222700_10000034	5132	4851	hypothetical protein	Match
A27	Ga0222700_1000003	Ga0222700_10000035	5977	5228	3-oxoacyl-[acyl-carrier protein] reductase	Match
A27	Ga0222700_1000003	Ga0222700_10000036	7119	6064	molybdate transport system ATP-binding protein	Match
A27	Ga0222700_1000003	Ga0222700_10000037	7802	7116	molybdate transport system permease protein	Match
A27	Ga0222700_1000003	Ga0222700_10000038	8575	7802	molybdate transport system substrate-binding protein	Match
A27	Ga0222700_1000003	Ga0222700_10000039	9446	8595	molybdenum transport protein	Match
A27	Ga0222700_1000003	Ga0222700_100000310	9734	10069	DNA-binding transcriptional ArsR family regulator	Match
A27	Ga0222700_1000003	Ga0222700_100000311	10124	10417	thioredoxin-like protein	Match
A27	Ga0222700_1000003	Ga0222700_100000312	10443	11456	hypothetical protein	Match
A27	Ga0222700_1000003	Ga0222700_100000313	11497	11925	arsenate reductase	Partial match
A27	Ga0222700_1000003	Ga0222700_100000314	12000	12704	lipoprotein-releasing system ATP-binding protein	Match
A27	Ga0222700_1000003	Ga0222700_100000315	12732	14282	lycopene cyclase CruA	Match
A27	Ga0222700_1000003	Ga0222700_100000316	14284	16308	DNA ligase (NAD+)	Match
A27	Ga0222700_1000003	Ga0222700_100000317	17307	16561	demethylmenaquinone methyltransferase/2-methoxy-6-polyprenyl-1,4-benzoquinol methylase	Match
A27	Ga0222700_1000003	Ga0222700_100000318	17704	17291	phosphoribosyl-AMP cyclohydrolase	Match
A27	Ga0222700_1000003	Ga0222700_100000319	17872	18969	multidrug efflux pump subunit AcrA (membrane-fusion protein)	Match
A27	Ga0222700_1000003	Ga0222700_100000320	18962	19867	hypothetical protein	Match
A27	Ga0222700_1000003	Ga0222700_100000321	21338	19887	NADPH-dependent glutamate synthase beta subunit-like oxidoreductase/phytoene dehydrogenase-like protein	Match
A27	Ga0222700_1000003	Ga0222700_100000322	22289	21444	ferredoxin--NADP+ reductase	Match
A27	Ga0222700_1000003	Ga0222700_100000323	22459	23064	glutamine amidotransferase	Match
A27	Ga0222700_1000003	Ga0222700_100000324	23109	23879	phosphoribosylformimino-5-aminoimidazole carboxamide ribotide isomerase	Match
A27	Ga0222700_1000003	Ga0222700_100000325	23931	24572	segregation and condensation protein B	Match
A27	Ga0222700_1000003	Ga0222700_100000326	24550	25293	16S rRNA U516 pseudouridylate synthase RsuA-like enzyme	Match
A27	Ga0222700_1000003	Ga0222700_100000327	25330	27381	hypothetical protein	Match
A27	Ga0222700_1000003	Ga0222700_100000328	28342	27395	L-threonylcarbamoyladenylate synthase	Match
A27	Ga0222700_1000003	Ga0222700_100000329	29007	28351	dolichol kinase	Match
A27	Ga0222700_1000003	Ga0222700_100000330	29175	30728	exopolyphosphatase/guanosine-5'-triphosphate,3'-diphosphate pyrophosphatase	Match
A27	Ga0222700_1000003	Ga0222700_100000331	30691	32583	para-aminobenzoate synthetase/4-amino-4-deoxychorismate lyase	Match
A27	Ga0222700_1000003	Ga0222700_100000332	32677	33135	hypothetical protein	Match
A27	Ga0222700_1000003	Ga0222700_100000333	33814	33182	endonuclease-3	Partial match
A27	Ga0222700_1000003	Ga0222700_100000334	34512	33811	serine/threonine protein phosphatase 1	Match
A27	Ga0222700_1000003	Ga0222700_100000335	35032	34493	N utilization substance protein B	Match
A27	Ga0222700_1000003	Ga0222700_100000336	35744	35043	phosphoglycolate phosphatase-like HAD superfamily hydrolase	Match
A27	Ga0222700_1000003	Ga0222700_100000337	39301	35765	chromosome segregation protein	Match
A27	Ga0222700_1000003	Ga0222700_100000338	40505	39414	dihydropteroate synthase	Partial match
A27	Ga0222700_1000003	Ga0222700_100000339	41550	40522	membrane-associated protease RseP (regulator of RpoE activity)	Match
A27	Ga0222700_1000003	Ga0222700_100000340	42013	41567	heme-binding protein	Match
A27	Ga0222700_1000003	Ga0222700_100000341	42991	42062	ubiquinone/menaquinone biosynthesis C-methylase UbiE	Match
A27	Ga0222700_1000003	Ga0222700_100000342	43195	43662	DNA-binding IscR family transcriptional regulator	Partial match
A27	Ga0222700_1000003	Ga0222700_100000343	43667	44533	ferredoxin	Partial match
A27	Ga0222700_1000003	Ga0222700_100000344	44547	44966	hypothetical protein	Match
A27	Ga0222700_1000003	Ga0222700_100000345	44981	46609	hydroxylamine reductase	Match
A27	Ga0222700_1000003	Ga0222700_100000346	46877	48712	ATP-dependent DNA helicase RecQ	Partial match
A27	Ga0222700_1000003	Ga0222700_100000347	48819	49328	transcription antitermination factor NusG	Partial match
A27	Ga0222700_1000003	Ga0222700_100000348	50106	49411	uncharacterized membrane protein	Match
A27	Ga0222700_1000003	Ga0222700_100000349	53043	50215	excinuclease ABC subunit A	Match
A27	Ga0222700_1000003	Ga0222700_100000350	53190	54095	simple sugar transport system permease protein	Match
A27	Ga0222700_1000003	Ga0222700_100000351	54743	54087	enhancing lycopene biosynthesis protein 2	Match
A27	Ga0222700_1000003	Ga0222700_100000352	55294	54788	protein-S-isoprenylcysteine O-methyltransferase Ste14	Match
A27	Ga0222700_1000003	Ga0222700_100000353	55407	55952	nicotinamidase-related amidase	Match
A27	Ga0222700_1000003	Ga0222700_100000354	57037	55973	tetraacyldisaccharide 4'-kinase	Match
A27	Ga0222700_1000003	Ga0222700_100000355	57647	57030	hypothetical protein	Match
A27	Ga0222700_1000003	Ga0222700_100000356	57808	59091	phosphoribosylamine--glycine ligase	Match
A27	Ga0222700_1000003	Ga0222700_100000357	59157	59588	proteasome lid subunit RPN8/RPN11	Match
A27	Ga0222700_1000003	Ga0222700_100000358	59650	61128	carbamoyl-phosphate synthase large subunit	Match
A27	Ga0222700_1000003	Ga0222700_100000359	61138	61914	indole-3-glycerol phosphate synthase	Match
A27	Ga0222700_1000003	Ga0222700_100000360	62610	61945	ribulose-phosphate 3-epimerase	Match
A27	Ga0222700_1000003	Ga0222700_100000361	64813	62633	outer membrane protein assembly factor BamA/outer membrane protein assembly factor BamA/outer membrane translocation and assembly module TamA	Match
A27	Ga0222700_1000003	Ga0222700_100000362	65089	64862	uncharacterized protein DUF2795	Match
A27	Ga0222700_1000003	Ga0222700_100000363	65830	65114	murein DD-endopeptidase MepM/ murein hydrolase activator NlpD	Match
A27	Ga0222700_1000003	Ga0222700_100000364	68745	65923	DNA polymerase-1	Match
A27	Ga0222700_1000003	Ga0222700_100000365	69584	68742	prephenate dehydratase	Match
A27	Ga0222700_1000003	Ga0222700_100000366	69702	70454	transcriptional/translational regulatory protein YebC/TACO1	Match
A27	Ga0222700_1000003	Ga0222700_100000367	70458	71024	crossover junction endodeoxyribonuclease RuvC	Match
A27	Ga0222700_1000003	Ga0222700_100000368	71042	71596	CDP-diacylglycerol--glycerol-3-phosphate 3-phosphatidyltransferase	Match
A27	Ga0222700_1000003	Ga0222700_100000369	72998	71586	UDP-3-O-[3-hydroxymyristoyl] N-acetylglucosamine deacetylase/3-hydroxyacyl-[acyl-carrier-protein] dehydratase	Match
A27	Ga0222700_1000003	Ga0222700_100000370	73935	73108	myo-inositol-1(or 4)-monophosphatase	Match
A27	Ga0222700_1000003	Ga0222700_100000371	74123	74605	tryptophan-rich sensory protein	Match
A27	Ga0222700_1000003	Ga0222700_100000372	76647	74674	acetyl-CoA synthetase	Match
A27	Ga0222700_1000003	Ga0222700_100000373	79233	76816	leucyl-tRNA synthetase	Match
A27	Ga0222700_1000003	Ga0222700_100000374	81694	79346	polyribonucleotide nucleotidyltransferase	Match
A27	Ga0222700_1000003	Ga0222700_100000375	82530	81679	pantoate--beta-alanine ligase	Match
A27	Ga0222700_1000003	Ga0222700_100000376	83212	82514	16S rRNA (cytidine1402-2'-O)-methyltransferase	Match
A27	Ga0222700_1000003	Ga0222700_100000377	83396	84424	peptide/nickel transport system ATP-binding protein	Match
A27	Ga0222700_1000003	Ga0222700_100000378	84421	86235	protease-4	Match
A27	Ga0222700_1000003	Ga0222700_100000379	87794	86247	magnesium chelatase family protein	Match
A27	Ga0222700_1000003	Ga0222700_100000380	90667	87902	phosphoenolpyruvate carboxylase	No match	Other metabolism
A27	Ga0222700_1000003	Ga0222700_100000381	90837	91478	photosystem P840 reaction center cytochrome c551	Match
A27	Ga0222700_1000003	Ga0222700_100000382	91924	91574	7-cyano-7-deazaguanine reductase	Match
A27	Ga0222700_1000003	Ga0222700_100000383	92074	92781	predicted nicotinamide N-methyase	Match
A27	Ga0222700_1000003	Ga0222700_100000384	92774	93613	hypothetical protein	Match
A27	Ga0222700_1000003	Ga0222700_100000385	93610	94596	integrase/recombinase XerC	Match
A27	Ga0222700_1000003	Ga0222700_100000386	94821	95141	putative sigma-54 modulation protein	Match
A27	Ga0222700_1000003	Ga0222700_100000387	95191	96189	HPr kinase/phosphorylase	Match
A27	Ga0222700_1000003	Ga0222700_100000388	96155	97945	peptide/nickel transport system substrate-binding protein	Match
A27	Ga0222700_1000003	Ga0222700_100000389	97952	98917	peptide/nickel transport system permease protein	Match
A27	Ga0222700_1000003	Ga0222700_100000390	98929	99966	Holliday junction DNA helicase RuvB	Match
A27	Ga0222700_1000003	Ga0222700_100000391	99947	101707	tetratricopeptide (TPR) repeat protein/tetratricopeptide (TPR) repeat protein	Partial match
A27	Ga0222700_1000003	Ga0222700_100000392	105358	101810	pyruvate-ferredoxin/flavodoxin oxidoreductase	Match
A27	Ga0222700_1000003	Ga0222700_100000393	105560	106375	23S rRNA (guanosine2251-2'-O)-methyltransferase	Match
A27	Ga0222700_1000003	Ga0222700_100000394	106494	106877	glycine cleavage system H protein	Match
A27	Ga0222700_1000003	Ga0222700_100000395	106923	108215	glycine cleavage system pyridoxal-binding protein P	Match
A27	Ga0222700_1000003	Ga0222700_100000396	109147	108212	4-hydroxy-tetrahydrodipicolinate synthase	Match
A27	Ga0222700_1000003	Ga0222700_100000397	110892	109171	DNA repair protein RecN (Recombination protein N)	Match
A27	Ga0222700_1000003	Ga0222700_100000398	111176	110967	sec-independent protein translocase protein TatA	Match
A27	Ga0222700_1000003	Ga0222700_100000399	111931	111272	phosphatidylserine decarboxylase	Match
A27	Ga0222700_1000003	Ga0222700_1000003100	112141	113133	tRNA(Ile)-lysidine synthase	Match
A27	Ga0222700_1000003	Ga0222700_1000003101	114139	113108	hypothetical protein	Match
A27	Ga0222700_1000003	Ga0222700_1000003102	114598	114158	ribonuclease HI	Match
A27	Ga0222700_1000003	Ga0222700_1000003103	114893	114675	large subunit ribosomal protein L28	Match
A27	Ga0222700_1000003	Ga0222700_1000003104	115960	114968	chlorophyll synthase	Match
A27	Ga0222700_1000003	Ga0222700_1000003105	117114	116059	anthranilate phosphoribosyltransferase	Match
A27	Ga0222700_1000003	Ga0222700_1000003106	117238	118332	Xaa-Pro aminopeptidase/Xaa-Pro dipeptidase	Partial match
A27	Ga0222700_1000003	Ga0222700_1000003107	119516	118350	DNA polymerase-3 subunit delta'	Partial match
A27	Ga0222700_1000003	Ga0222700_1000003108	120460	119537	branched-chain amino acid aminotransferase	Match
A27	Ga0222700_1000003	Ga0222700_1000003109	121803	120598	6-phosphofructokinase 1	Match
A27	Ga0222700_1000003	Ga0222700_1000003110	121959	123227	lipoprotein-releasing system permease protein	Match
A27	Ga0222700_1000003	Ga0222700_1000003111	123710	123237	2-C-methyl-D-erythritol 2,4-cyclodiphosphate synthase	Match
A27	Ga0222700_1000003	Ga0222700_1000003112	124740	123808	dihydroorotate dehydrogenase (NAD+) catalytic subunit	Partial match
A27	Ga0222700_1000003	Ga0222700_1000003113	126959	124839	starch phosphorylase	Match
A27	Ga0222700_1000003	Ga0222700_1000003114	127010	128008	3',5'-cyclic AMP phosphodiesterase CpdA/predicted phosphodiesterase	Match
A27	Ga0222700_1000003	Ga0222700_1000003115	128488	128021	hypothetical protein	Match
A27	Ga0222700_1000003	Ga0222700_1000003116	130510	128642	carbamoyl-phosphate synthase large subunit	Partial match
A27	Ga0222700_1000003	Ga0222700_1000003117	130746	131978	3,4-dihydroxy 2-butanone 4-phosphate synthase/GTP cyclohydrolase II	Match
A27	Ga0222700_1000003	Ga0222700_1000003118	132038	133363	glycine hydroxymethyltransferase	Match
A27	Ga0222700_1000003	Ga0222700_1000003119	135391	133490	DNA primase	Match
A27	Ga0222700_1000003	Ga0222700_1000003120	135620	136366	biopolymer transport protein ExbB	Match
A27	Ga0222700_1000003	Ga0222700_1000003121	136372	136905	biopolymer transport protein ExbD	Match
A27	Ga0222700_1000003	Ga0222700_1000003122	136907	137431	biopolymer transport protein ExbD	Match
A27	Ga0222700_1000003	Ga0222700_1000003123	137463	138254	protein TonB	Match
A27	Ga0222700_1000003	Ga0222700_1000003124	138504	138223	hypothetical protein	Match
A27	Ga0222700_1000003	Ga0222700_1000003125	139675	138470	acetylornithine aminotransferase	Match
A27	Ga0222700_1000003	Ga0222700_1000003126	139752	140009	hypothetical protein	Partial match
A27	Ga0222700_1000003	Ga0222700_1000003127	141283	139967	NADH dehydrogenase FAD-containing subunit/NADPH-dependent 2,4-dienoyl-CoA reductase/sulfur reductase-like enzyme	Match
A27	Ga0222700_1000003	Ga0222700_1000003128	141864	141361	hypothetical protein	Match
A27	Ga0222700_1000003	Ga0222700_1000003129	142330	141851	5-(carboxyamino)imidazole ribonucleotide mutase	Match
A27	Ga0222700_1000003	Ga0222700_1000003130	142511	143929	oxygen-independent coproporphyrinogen-3 oxidase	Match
A27	Ga0222700_1000003	Ga0222700_1000003131	143987	145126	predicted dehydrogenase	Match
A27	Ga0222700_1000003	Ga0222700_1000003132	145278	145760	DNA-binding MarR family transcriptional regulator	Match
A27	Ga0222700_1000003	Ga0222700_1000003133	145770	147095	lysine 2,3-aminomutase	Match
A27	Ga0222700_1000003	Ga0222700_1000003134	147092	148537	SSS family solute:Na+ symporter	Match
A27	Ga0222700_1000003	Ga0222700_1000003135	148527	149369	hypothetical protein	Match
A27	Ga0222700_1000003	Ga0222700_1000003136	150186	149389	ABC-type transport system involved in cytochrome c biogenesis permease subunit	Match
A27	Ga0222700_1000003	Ga0222700_1000003137	151418	150183	cytochrome c biogenesis protein ResB	Match
A27	Ga0222700_1000003	Ga0222700_1000003138	152193	151408	molybdopterin/thiamine biosynthesis adenylyltransferase	Match
A27	Ga0222700_1000003	Ga0222700_1000003139	153254	152184	2-iminoacetate synthase	Match
A27	Ga0222700_1000003	Ga0222700_1000003140	154030	153251	thiazole synthase	Match
A27	Ga0222700_1000003	Ga0222700_1000003141	154307	154056	sulfur carrier protein	Match
A27	Ga0222700_1000003	Ga0222700_1000003142	155443	154298	cystathionine gamma-synthase	Match
A27	Ga0222700_1000003	Ga0222700_1000003143	156890	155499	O-acetylhomoserine (thiol)-lyase	Partial match
A27	Ga0222700_1000003	Ga0222700_1000003144	156954	157391	MOSC domain-containing protein YiiM	Match
A27	Ga0222700_1000003	Ga0222700_1000003145	158434	157394	cyclic pyranopterin phosphate synthase	Match
A27	Ga0222700_1000003	Ga0222700_1000003146	159376	158564	molybdate transport system regulatory protein	Match
A27	Ga0222700_1000003	Ga0222700_1000003147	161780	159552	iron complex outermembrane receptor protein	Partial match
A27	Ga0222700_1000003	Ga0222700_1000003148	162253	161945	(2Fe-2S) ferredoxin	Match
A27	Ga0222700_1000003	Ga0222700_1000003149	163628	162321	nitrogen fixation protein NifB	Match
A27	Ga0222700_1000003	Ga0222700_1000003150	164949	163597	nitrogenase molybdenum-iron protein NifN	Match
A27	Ga0222700_1000003	Ga0222700_1000003151	166307	164946	nitrogenase molybdenum-cofactor synthesis protein NifE	Match
A27	Ga0222700_1000003	Ga0222700_1000003152	167784	166405	nitrogenase molybdenum-iron protein beta chain	Match
A27	Ga0222700_1000003	Ga0222700_1000003153	169451	167811	nitrogenase molybdenum-iron protein alpha chain	Match
A27	Ga0222700_1000003	Ga0222700_1000003154	169868	169491	nitrogen regulatory protein PII 2	Match
A27	Ga0222700_1000003	Ga0222700_1000003155	170225	169869	nitrogen regulatory protein PII 1	Match
A27	Ga0222700_1000003	Ga0222700_1000003156	171070	170246	nitrogenase iron protein NifH	Match
A27	Ga0222700_1000003	Ga0222700_1000003157	171364	171495	hypothetical protein	Match
A27	Ga0222700_1000003	Ga0222700_1000003158	173146	171569	Nif-specific regulatory protein	Match
A27	Ga0222700_1000003	Ga0222700_1000003159	174326	173166	homocitrate synthase NifV	Match
A27	Ga0222700_1000003	Ga0222700_1000003160	174573	175751	acetate kinase	No match	Other metabolism
A27	Ga0222700_1000003	Ga0222700_1000003161	175778	178183	xylulose-5-phosphate/fructose-6-phosphate phosphoketolase	No match	Other metabolism
A27	Ga0222700_1000003	Ga0222700_1000003162	178203	178370	hypothetical protein	No match	Hypothetical
A27	Ga0222700_1000003	Ga0222700_1000003163	178357	178533	magnesium transporter	No match	Transport
A27	Ga0222700_1000003	Ga0222700_1000003164	178578	179132	complex I intermediate-associated protein 30 (CIA30)	Partial match
A27	Ga0222700_1000003	Ga0222700_1000003165	179877	179122	cyclase	Partial match
A27	Ga0222700_1000003	Ga0222700_1000003166	180028	180354	hypothetical protein	Match
A27	Ga0222700_1000003	Ga0222700_1000003167	180370	181431	thioredoxin reductase (NADPH)	Match
A27	Ga0222700_1000003	Ga0222700_1000003168	181424	182293	1,4-dihydroxy-2-naphthoate octaprenyltransferase	Match
A27	Ga0222700_1000003	Ga0222700_1000003169	182312	183190	N-carbamoylputrescine amidase	Match
A27	Ga0222700_1000003	Ga0222700_1000003170	183221	184465	STE24 endopeptidase	Match
A27	Ga0222700_1000003	Ga0222700_1000003171	184496	185566	agmatine deiminase	Match
A27	Ga0222700_1000003	Ga0222700_1000003172	186587	185658	malate dehydrogenase	Match
A27	Ga0222700_1000003	Ga0222700_1000003173	186991	186737	large subunit ribosomal protein L27	Match
A27	Ga0222700_1000003	Ga0222700_1000003174	187324	187034	large subunit ribosomal protein L21	Match
A27	Ga0222700_1000003	Ga0222700_1000003175	187587	190211	DNA mismatch repair protein MutS	Match
A27	Ga0222700_1000003	Ga0222700_1000003176	192005	190248	ATP-binding cassette subfamily B protein	Match
A27	Ga0222700_1000003	Ga0222700_1000003177	192087	192488	DNA-binding transcriptional MerR regulator	Match
A27	Ga0222700_1000003	Ga0222700_1000003178	193663	192563	bacteriochlorophyll A protein	Match
A27	Ga0222700_1000003	Ga0222700_1000003179	193889	193776	hypothetical protein	Partial match
A27	Ga0222700_1000003	Ga0222700_1000003180	193896	195518	apolipoprotein N-acyltransferase	Match
A27	Ga0222700_1000003	Ga0222700_1000003181	196638	195499	DNA-binding NtrC family response regulator	Match
A27	Ga0222700_1000003	Ga0222700_1000003182	197324	196635	sporulation related protein	Match
A27	Ga0222700_1000003	Ga0222700_1000003183	197472	198338	4-diphosphocytidyl-2-C-methyl-D-erythritol kinase	Match
A27	Ga0222700_1000003	Ga0222700_1000003184	199202	198342	predicted amidohydrolase	Match
A27	Ga0222700_1000003	Ga0222700_1000003185	200528	199221	AGZA family xanthine/uracil permease-like MFS transporter	Match
A27	Ga0222700_1000003	Ga0222700_1000003186	200677	201267	peroxiredoxin (alkyl hydroperoxide reductase subunit C)	Match
A27	Ga0222700_1000003	Ga0222700_1000003187	202832	201387	prolyl-tRNA synthetase	Match
A27	Ga0222700_1000003	Ga0222700_1000003188	203662	202880	uncharacterized protein DUF4412	Match
A27	Ga0222700_1000003	Ga0222700_1000003189	203801	204709	release factor glutamine methyltransferase	Match
A27	Ga0222700_1000003	Ga0222700_1000003190	204841	205926	heat-inducible transcriptional repressor	Match
A27	Ga0222700_1000003	Ga0222700_1000003191	205932	206516	molecular chaperone GrpE	Match
A27	Ga0222700_1000003	Ga0222700_1000003192	206540	207700	molecular chaperone DnaJ	Partial match
A27	Ga0222700_1000003	Ga0222700_1000003193	208251	207781	menaquinone-dependent protoporphyrinogen IX oxidase	Match
A27	Ga0222700_1000003	Ga0222700_1000003194	209425	208421	glyceraldehyde 3-phosphate dehydrogenase	Match
A27	Ga0222700_1000003	Ga0222700_1000003195	210983	209553	UDP-N-acetylmuramate: L-alanyl-gamma-D-glutamyl-meso-diaminopimelate ligase	Match
A27	Ga0222700_1000003	Ga0222700_1000003196	211187	211759	uncharacterized protein YjbI with pentapeptide repeats	Partial match
A27	Ga0222700_1000003	Ga0222700_1000003197	211838	212950	dTDP-4-amino-4,6-dideoxygalactose transaminase	Match
A27	Ga0222700_1000003	Ga0222700_1000003198	213522	213076	hypothetical protein	No match	Hypothetical
A27	Ga0222700_1000003	Ga0222700_1000003199	214831	213494	hypothetical protein	No match	Hypothetical
A27	Ga0222700_1000003	Ga0222700_1000003200	216109	214886	transposase	No match	Mobile element
A27	Ga0222700_1000003	Ga0222700_1000003201	216687	216517	hypothetical protein	No match	Hypothetical
The AL Ca. Chlorobium antarcticum MAG contigs were aligned to Cpv-DSM265 genome to identify genetic differences between the two species.
A For this comparison, AL_ref MAG was used (see contig descriptions in Additional file 1: Table S3). The genes in the LCRs of AL_ref MAG are highlighted in red font.
B The genes on the AL_ref MAG contigs were auto-annotated by IMG system.
C The AL Ca. Chlorobium antarcticum MAG genes with matches to Cpv-DSM265 genes are denoted as: 'Match', genes with full length matches; 'Partial match', genes with less than full length matches. The genes with no matches to Cpv-DSM265 highlighted with a yellow background colour. The sequence identitity of the matches varied between 75–98% (on average 86%).

## Sheet: Cpv-DSM265 genes
Cpv-DSM265	Start	End	Gene functionA	Matches to AL_ref MAGB	Overall function of "No match" genes
NC_009337.1	1	1464	chromosomal replication initiator protein DnaA	Match
NC_009337.1	1750	2874	DNA polymerase III subunit beta	Match
NC_009337.1	2942	4057	DNA replication/repair protein RecF	Match
NC_009337.1	4060	4365	DUF721 domain-containing protein	Match
NC_009337.1	5656	4433	FprA family A-type flavoprotein	Match
NC_009337.1	8136	5734	DNA polymerase	Partial match
NC_009337.1	10151	8286	tRNA uridine-5-carboxymethylaminomethyl(34) synthesis enzyme MnmG	No match	RNA modification
NC_009337.1	10568	10909	sulfide dehydrogenase	Partial match
NC_009337.1	10925	12220	FAD-dependent oxidoreductase	Match
NC_009337.1	12374	14158	protein translocase subunit SecD	Match
NC_009337.1	14183	15118	protein translocase subunit SecF	Match
NC_009337.1	15186	16505	peptidyl-prolyl cis-trans isomerase	Match
NC_009337.1	18422	16494	DNA topoisomerase (ATP-hydrolyzing) subunit B	Match
NC_009337.1	18894	18499	YraN family protein	Match
NC_009337.1	19613	18891	ribonuclease HII	Match
NC_009337.1	19790	21484	ribonuclease E/G	Match
NC_009337.1	21567	22430	2,3,4,5-tetrahydropyridine-2,6-dicarboxylate N-succinyltransferase	Match
NC_009337.1	22460	24142	S41 family peptidase	Match
NC_009337.1	24809	24081	DUF3593 domain-containing protein	Match
NC_009337.1	25952	24810	geranylgeranyl diphosphate reductase	Match
NC_009337.1	27404	25992	glycine--tRNA ligase	Match
NC_009337.1	27843	27562	ATP-dependent Clp protease adaptor ClpS	Match
NC_009337.1	28928	27972	LD-carboxypeptidase	Partial match
NC_009337.1	29227	28961	hypothetical protein	Match
NC_009337.1	30630	29242	F0F1 ATP synthase subunit beta	Match
NC_009337.1	30799	30727	tRNA-Thr	Match
NC_009337.1	30950	31501	redoxin family protein	Match
NC_009337.1	31603	33468	phosphoenolpyruvate carboxykinase (GTP)	Match
NC_009337.1	33740	35128	TonB-dependent receptor	No match	Transport
NC_009337.1	35416	35210	dodecin domain-containing protein	Match
NC_009337.1	35666	37234	polysulfide reductase NrfD	Match
NC_009337.1	37256	40122	molybdopterin-dependent oxidoreductase	Match
NC_009337.1	40127	41089	sulfite exporter TauE/SafE family protein	Match
NC_009337.1	41086	41514	hypothetical protein	Match
NC_009337.1	41640	42149	NADH dehydrogenase	Match
NC_009337.1	42170	42637	rhodanese-like domain-containing protein	Match
NC_009337.1	42678	42914	sulfurtransferase TusA family protein	Match
NC_009337.1	42972	44342	cobyrinate a,c-diamide synthase	Match
NC_009337.1	44472	44807	TusE/DsrC/DsvC family sulfur relay protein	Match
NC_009337.1	44864	46117	dissimilatory-type sulfite reductase subunit alpha	Match
NC_009337.1	46174	47253	dissimilatory-type sulfite reductase subunit beta	Match
NC_009337.1	47269	49005	NAD(P)-binding protein	Match
NC_009337.1	49043	49405	hypothetical protein	Match
NC_009337.1	49455	49814	sulfurtransferase complex subunit TusD	Match
NC_009337.1	49820	50188	sulfurtransferase complex subunit TusC	Match
NC_009337.1	50229	50522	sulfurtransferase complex subunit TusB	Match
NC_009337.1	50543	50989	hypothetical protein	Match
NC_009337.1	50986	51981	sulfate reduction electron transfer complex DsrMKJOP subunit DsrM	Match
NC_009337.1	51981	53633	(Fe-S)-binding protein	Match
NC_009337.1	53626	54012	hypothetical protein	Match
NC_009337.1	54012	54767	4Fe-4S dicluster domain-containing protein	Match
NC_009337.1	54777	55922	polysulfide reductase NrfD	Match
NC_009337.1	55919	56386	porphyrin biosynthesis protein	Match
NC_009337.1	56398	57774	uroporphyrinogen-III C-methyltransferase	Match
NC_009337.1	58229	58810	uridine kinase	Match
NC_009337.1	58797	60083	MFS transporter	Match
NC_009337.1	61708	60110	DHA2 family efflux MFS transporter permease subunit	Match
NC_009337.1	62690	61719	HlyD family secretion protein	Match
NC_009337.1	63164	62697	universal stress protein	Match
NC_009337.1	64474	63161	TolC family protein	Match
NC_009337.1	64681	66795	sigma 54-interacting transcriptional regulator	Partial match
NC_009337.1	66958	67539	hypothetical protein	Match
NC_009337.1	67716	67871	hypothetical protein	No match	Hypothetical
NC_009337.1	69084	67900	DNA cytosine methyltransferase	No match	DNA modification
NC_009337.1	69809	69030	restriction endonuclease	No match	Cell defence
NC_009337.1	73108	69878	UvrD-helicase domain-containing protein	No match	DNA recombination and repair
NC_009337.1	75833	73068	PD-(D/E)XK nuclease family protein	No match	DNA recombination and repair
NC_009337.1	76421	75846	hypothetical protein	No match	Hypothetical
NC_009337.1	77004	76501	PH domain-containing protein	No match	Cell signaling
NC_009337.1	77260	77766	hypothetical protein	No match	Hypothetical
NC_009337.1	77868	78449	serine/threonine-protein phosphatase	No match	Other metabolism
NC_009337.1	78407	78637	SpoIIE family protein phosphatase	No match	Other metabolism
NC_009337.1	78880	80799	hypothetical protein	No match	Hypothetical
NC_009337.1	80817	82562	hypothetical protein	No match	Hypothetical
NC_009337.1	82552	83850	hypothetical protein	No match	Hypothetical
NC_009337.1	83847	89510	DEAD/DEAH box helicase	No match	DNA modification
NC_009337.1	90380	89631	hypothetical protein	No match	Hypothetical
NC_009337.1	92051	90381	DEAD/DEAH box helicase family protein	No match	DNA modification
NC_009337.1	94371	92053	ATP-binding protein	No match	General function
NC_009337.1	95890	94487	DNA cytosine methyltransferase	No match	DNA modification
NC_009337.1	96278	95970	DNA mismatch endonuclease	No match	DNA recombination and repair
NC_009337.1	97389	96403	IS3 family transposase	No match	Mobile element
NC_009337.1	97898	97416	transposase	No match	Mobile element
NC_009337.1	98659	98045	hypothetical protein	No match	Hypothetical
NC_009337.1	99832	99164	HNH endonuclease	No match	General function
NC_009337.1	100636	100058	IS3 family transposase	No match	Mobile element
NC_009337.1	100653	100865	transposase	No match	Mobile element
NC_009337.1	102894	100915	DUF262 domain-containing protein	No match	Hypothetical
NC_009337.1	104281	102878	DUF262 domain-containing protein	No match	Hypothetical
NC_009337.1	105395	104370	WYL domain-containing transcriptional regulator	No match	Transcription regulation
NC_009337.1	106048	105503	hypothetical protein	No match	Hypothetical
NC_009337.1	106497	107591	WYL domain-containing protein	No match	General function
NC_009337.1	107699	108136	hypothetical protein	No match	Hypothetical
NC_009337.1	108126	108275	hypothetical protein	No match	Hypothetical
NC_009337.1	108298	109245	ADP-ribosylglycohydrolase family protein	No match	General function
NC_009337.1	109286	109975	hypothetical protein	No match	Hypothetical
NC_009337.1	110232	109984	hypothetical protein	No match	Hypothetical
NC_009337.1	111266	110385	TIGR02452 family protein	No match	Hypothetical
NC_009337.1	111348	111521	hypothetical protein	No match	Hypothetical
NC_009337.1	112112	117964	DUF3320 domain-containing protein	No match	Hypothetical
NC_009337.1	118111	118291	DUF4372 domain-containing protein	No match	Hypothetical
NC_009337.1	118910	119389	hypothetical protein	No match	Hypothetical
NC_009337.1	119403	120023	uracil-DNA glycosylase	No match	DNA recombination and repair
NC_009337.1	120506	121198	hypothetical protein	No match	Hypothetical
NC_009337.1	121241	122752	sel1 repeat family protein	No match	Cell signaling
NC_009337.1	122877	123299	hypothetical protein	No match	Hypothetical
NC_009337.1	123944	124405	hypothetical protein	No match	Hypothetical
NC_009337.1	124615	124785	hypothetical protein	No match	Hypothetical
NC_009337.1	124786	125316	DDE-type integrase/transposase/recombinase	No match	Mobile element
NC_009337.1	125510	126658	hypothetical protein	No match	Hypothetical
NC_009337.1	128246	126768	NAD-dependent DNA ligase LigA	No match	DNA recombination and repair
NC_009337.1	128566	128282	thioredoxin family protein	No match	General function
NC_009337.1	128993	128658	winged helix-turn-helix transcriptional regulator	No match	Transcription regulation
NC_009337.1	129318	130175	ModD protein	No match	Other metabolism
NC_009337.1	130188	130961	molybdate ABC transporter substrate-binding protein	No match	Transport
NC_009337.1	130975	131661	molybdate ABC transporter permease subunit	No match	Transport
NC_009337.1	131658	132713	molybdenum ABC transporter ATP-binding protein	No match	Transport
NC_009337.1	132803	133917	IS3 family transposase	No match	Mobile element
NC_009337.1	133995	134732	transposase	Partial match
NC_009337.1	134897	135280	hypothetical protein	No match	Hypothetical
NC_009337.1	135665	136153	hypothetical protein	No match	Hypothetical
NC_009337.1	136203	136577	hypothetical protein	No match	Hypothetical
NC_009337.1	136616	137065	5'-3'-deoxyribonucleotidase	No match	Other metabolism
NC_009337.1	137155	137760	hypothetical protein	No match	Hypothetical
NC_009337.1	138271	137867	PEGA domain-containing protein	No match	General function
NC_009337.1	139491	138907	3'-5' exonuclease	Match
NC_009337.1	140155	139523	helix-turn-helix transcriptional regulator	No match	Transcription regulation
NC_009337.1	140314	140916	VWA domain-containing protein	Match
NC_009337.1	141053	141409	DUF3127 domain-containing protein	Match
NC_009337.1	141598	142419	hypothetical protein	No match	Hypothetical
NC_009337.1	142466	143311	DUF4412 domain-containing protein	Match
NC_009337.1	143818	143342	hypothetical protein	Match
NC_009337.1	144024	144212	hypothetical protein	Match
NC_009337.1	144218	144673	translesion error-prone DNA polymerase V autoproteolytic subunit	Match
NC_009337.1	144685	145950	Y-family DNA polymerase	Match
NC_009337.1	147452	146088	hypothetical protein	Match
NC_009337.1	147837	149063	NAD(P)/FAD-dependent oxidoreductase	Match
NC_009337.1	149244	150698	NAD(P)/FAD-dependent oxidoreductase	No match	Other metabolism
NC_009337.1	150753	150911	hypothetical protein	No match	Hypothetical
NC_009337.1	151549	151013	nitroreductase	Partial match
NC_009337.1	152157	151546	DUF1997 domain-containing protein	Match
NC_009337.1	153281	152208	peptide chain release factor 1	Match
NC_009337.1	154611	153298	RIP metalloprotease RseP	Match
NC_009337.1	155805	154651	1-deoxy-D-xylulose-5-phosphate reductoisomerase	Match
NC_009337.1	155961	156037	tRNA-Val	Match
NC_009337.1	158146	156041	ATP-dependent metallopeptidase FtsH/Yme1/Tma family protein	Match
NC_009337.1	158371	159195	orotidine-5'-phosphate decarboxylase	Match
NC_009337.1	159247	161091	glutamine--fructose-6-phosphate transaminase (isomerizing)	Match
NC_009337.1	161765	161208	TlpA family protein disulfide reductase	No match	Other metabolism
NC_009337.1	163641	161878	thiosulfohydrolase SoxB	No match	Sulfur cycling
NC_009337.1	164035	163724	hypothetical protein	No match	Hypothetical
NC_009337.1	164905	164048	sulfur oxidation c-type cytochrome SoxA	No match	Sulfur cycling
NC_009337.1	165239	164934	thiosulfate oxidation carrier complex protein SoxZ	No match	Sulfur cycling
NC_009337.1	165737	165276	thiosulfate oxidation carrier protein SoxY	No match	Sulfur cycling
NC_009337.1	166279	165932	sulfur oxidation c-type cytochrome SoxX	No match	Sulfur cycling
NC_009337.1	167642	166347	FAD-dependent oxidoreductase	No match	Other metabolism
NC_009337.1	167989	168915	class I SAM-dependent methyltransferase	No match	Other metabolism
NC_009337.1	168940	169419	transposase	Match
NC_009337.1	169277	169639	IS3 family transposase	Partial match
NC_009337.1	170131	171372	group II intron reverse transcriptase/maturase	No match	DNA recombination and repair
NC_009337.1	171470	171925	DDE-type integrase/transposase/recombinase	Match
NC_009337.1	172231	172590	hypothetical protein	No match	Hypothetical
NC_009337.1	172678	174165	hypothetical protein	No match	Hypothetical
NC_009337.1	174162	174542	YcfL family protein	No match	General function
NC_009337.1	174567	175166	penicillin-binding protein activator LpoB	No match	Other metabolism
NC_009337.1	175170	175541	hypothetical protein	No match	Hypothetical
NC_009337.1	175557	176825	hypothetical protein	No match	Hypothetical
NC_009337.1	176942	177877	TIGR01777 family protein	Match
NC_009337.1	178224	177955	RNA-binding protein	Match
NC_009337.1	178589	179920	ammonium transporter	Match
NC_009337.1	179930	180271	P-II family nitrogen regulator	Match
NC_009337.1	180360	181286	cysteine protease	Match
NC_009337.1	181850	181290	tetratricopeptide repeat protein	Match
NC_009337.1	182074	182820	segregation/condensation protein A	Match
NC_009337.1	182839	184113	DUF1015 domain-containing protein	Match
NC_009337.1	184110	184559	tRNA (adenosine(37)-N6)-threonylcarbamoyltransferase complex ATPase subunit type 1 TsaE	Match
NC_009337.1	184556	185233	tRNA (adenosine(37)-N6)-threonylcarbamoyltransferase complex dimerization subunit type 1 TsaB	Match
NC_009337.1	185330	185725	ribosome silencing factor	Match
NC_009337.1	185850	188333	DNA gyrase subunit A	Match
NC_009337.1	188389	190173	CTP synthase	Match
NC_009337.1	190218	191237	mechanosensitive ion channel	Match
NC_009337.1	191775	193279	16S ribosomal RNA	Match
NC_009337.1	193441	193514	tRNA-Ile	Match
NC_009337.1	193562	193634	tRNA-Ala	Match
NC_009337.1	193772	196710	23S ribosomal RNA	Match
NC_009337.1	196799	196907	5S ribosomal RNA	Match
NC_009337.1	197662	197174	hypothetical protein	No match	Hypothetical
NC_009337.1	197908	198648	response regulator transcription factor	Match
NC_009337.1	199823	198675	hypothetical protein	Match
NC_009337.1	200006	200440	acyl-CoA thioesterase	Match
NC_009337.1	200437	200964	DUF3856 domain-containing protein	Match
NC_009337.1	200969	201967	glycosyltransferase family 9 protein	Match
NC_009337.1	202173	202574	30S ribosomal protein S6	Match
NC_009337.1	202656	203114	single-stranded DNA-binding protein	Match
NC_009337.1	203140	203412	30S ribosomal protein S18	Match
NC_009337.1	203449	203904	50S ribosomal protein L9	Match
NC_009337.1	204029	204427	hypothetical protein	Match
NC_009337.1	205511	204486	phenylalanine--tRNA ligase subunit alpha	Match
NC_009337.1	205878	205531	50S ribosomal protein L20	Match
NC_009337.1	206102	205905	50S ribosomal protein L35	Match
NC_009337.1	206774	206145	translation initiation factor IF-3	Match
NC_009337.1	208771	206771	threonine--tRNA ligase	Match
NC_009337.1	210436	209027	chlorophyllide a reductase subunit Z	Match
NC_009337.1	212201	210414	glycoside hydrolase family 3	Partial match
NC_009337.1	212842	212330	HNH endonuclease	No match	General function
NC_009337.1	214438	212981	aminomethyl-transferring glycine dehydrogenase subunit GcvPB	Match
NC_009337.1	215328	214549	ribonuclease III	Match
NC_009337.1	216604	215351	beta-ketoacyl-ACP synthase II	Match
NC_009337.1	216971	216735	acyl carrier protein	Match
NC_009337.1	217808	217071	3-oxoacyl-[acyl-carrier-protein] reductase	Match
NC_009337.1	218747	217827	ACP S-malonyltransferase	Match
NC_009337.1	219778	218789	ketoacyl-ACP synthase III	Match
NC_009337.1	220902	219874	phosphate acyltransferase PlsX	Match
NC_009337.1	221120	220929	50S ribosomal protein L32	Match
NC_009337.1	221685	221149	DUF177 domain-containing protein	Match
NC_009337.1	221907	221836	tRNA-Asn	Match
NC_009337.1	222112	222606	META domain-containing protein	Match
NC_009337.1	222935	224620	2-isopropylmalate synthase	Match
NC_009337.1	224748	225626	zinc ABC transporter solute-binding protein	Match
NC_009337.1	225623	226378	ABC transporter ATP-binding protein	Match
NC_009337.1	226375	227208	membrane protein	Match
NC_009337.1	227638	227183	universal stress protein	Match
NC_009337.1	228750	227635	bifunctional molybdenum cofactor guanylyltransferase MobA/molybdopterin-guanine dinucleotide biosynthesis adaptor protein MobB	Match
NC_009337.1	229021	228830	YqaE/Pmp3 family membrane protein	Match
NC_009337.1	229259	229567	hypothetical protein	Match
NC_009337.1	229709	230225	hypothetical protein	Match
NC_009337.1	230244	231065	glycerophosphoryl diester phosphodiesterase	Partial match
NC_009337.1	231193	232131	bifunctional molybdenum cofactor biosynthesis protein MoaC/MoaB	Match
NC_009337.1	232128	233354	molybdopterin molybdenumtransferase MoeA	Match
NC_009337.1	234173	233373	pyrroline-5-carboxylate reductase	Match
NC_009337.1	234446	234192	SemiSWEET transporter	Match
NC_009337.1	234900	234565	cytochrome c5 family protein	Match
NC_009337.1	235394	234981	cytochrome c5 family protein	Match
NC_009337.1	236654	235512	alanine--glyoxylate aminotransferase family protein	Match
NC_009337.1	237770	236661	glutamine-hydrolyzing carbamoyl-phosphate synthase small subunit	Match
NC_009337.1	238136	237780	preprotein translocase subunit YajC	Match
NC_009337.1	239290	238253	tRNA (adenosine(37)-N6)-threonylcarbamoyltransferase complex transferase subunit TsaD	Partial match
NC_009337.1	239312	239551	hypothetical protein	Match
NC_009337.1	239623	239931	hypothetical protein	Match
NC_009337.1	240105	241433	AAA family ATPase	Match
NC_009337.1	241521	242228	lipid-binding SYLF domain-containing protein	Match
NC_009337.1	242271	243698	Asp-tRNA(Asn)/Glu-tRNA(Gln) amidotransferase subunit GatB	Match
NC_009337.1	243963	243706	exodeoxyribonuclease VII small subunit	Match
NC_009337.1	244054	245064	GTPase ObgE	Match
NC_009337.1	245067	245570	N-acetyltransferase	Match
NC_009337.1	245567	245833	HPr family phosphocarrier protein	Match
NC_009337.1	245772	246950	glycosyltransferase	Partial match
NC_009337.1	246947	247795	glycosyltransferase	Match
NC_009337.1	247792	248376	methyltransferase domain-containing protein	Match
NC_009337.1	248363	249505	glycosyltransferase	Match
NC_009337.1	249502	250989	polysaccharide biosynthesis protein	Match
NC_009337.1	251058	253430	hypothetical protein	Match
NC_009337.1	253508	254791	hypothetical protein	Partial match
NC_009337.1	254966	255364	30S ribosomal protein S12	Match
NC_009337.1	255392	255859	30S ribosomal protein S7	Match
NC_009337.1	255896	258010	elongation factor G	Match
NC_009337.1	258074	259255	elongation factor Tu	Match
NC_009337.1	259338	259649	30S ribosomal protein S10	Match
NC_009337.1	259674	260303	50S ribosomal protein L3	Match
NC_009337.1	260323	260949	50S ribosomal protein L4	Match
NC_009337.1	260981	261292	50S ribosomal protein L23	Match
NC_009337.1	261325	262164	50S ribosomal protein L2	Match
NC_009337.1	262203	262499	30S ribosomal protein S19	Match
NC_009337.1	262531	262890	50S ribosomal protein L22	Match
NC_009337.1	262908	263663	30S ribosomal protein S3	Match
NC_009337.1	263708	264127	50S ribosomal protein L16	Match
NC_009337.1	264158	264364	50S ribosomal protein L29	Match
NC_009337.1	264414	264701	30S ribosomal protein S17	Match
NC_009337.1	264744	265112	50S ribosomal protein L14	Match
NC_009337.1	265126	265198	tRNA-Gly	Match
NC_009337.1	265232	265474	50S ribosomal protein L24	Match
NC_009337.1	265536	266132	50S ribosomal protein L5	Match
NC_009337.1	266149	266418	30S ribosomal protein S14	Match
NC_009337.1	266480	266875	30S ribosomal protein S8	Match
NC_009337.1	266903	267442	50S ribosomal protein L6	Match
NC_009337.1	267497	267856	50S ribosomal protein L18	Match
NC_009337.1	267878	268396	30S ribosomal protein S5	Match
NC_009337.1	268415	268600	50S ribosomal protein L30	Match
NC_009337.1	268635	269192	50S ribosomal protein L15	Match
NC_009337.1	269212	270543	preprotein translocase subunit SecY	Match
NC_009337.1	270558	271355	type I methionyl aminopeptidase	Match
NC_009337.1	271392	271610	translation initiation factor IF-1	Match
NC_009337.1	271722	271838	50S ribosomal protein L36	Match
NC_009337.1	271876	272253	30S ribosomal protein S13	Match
NC_009337.1	272303	272686	30S ribosomal protein S11	Match
NC_009337.1	272729	273340	30S ribosomal protein S4	Match
NC_009337.1	273370	274356	DNA-directed RNA polymerase subunit alpha	Match
NC_009337.1	274399	274929	50S ribosomal protein L17	Match
NC_009337.1	275660	274995	16S rRNA (guanine(527)-N(7))-methyltransferase RsmG	Match
NC_009337.1	275805	276923	hypothetical protein	Match
NC_009337.1	278389	276938	cysteine--tRNA ligase	Match
NC_009337.1	278501	279076	YihA family ribosome biogenesis GTP-binding protein	Match
NC_009337.1	279223	280527	adenylosuccinate synthase	Match
NC_009337.1	280547	280858	MTH1187 family thiamine-binding protein	Match
NC_009337.1	280973	282244	ferredoxin:protochlorophyllide reductase (ATP-dependent) subunit N	Match
NC_009337.1	282273	283856	ferredoxin:protochlorophyllide reductase (ATP-dependent) subunit B	Match
NC_009337.1	283894	284721	ferredoxin:protochlorophyllide reductase (ATP-dependent) iron-sulfur ATP-binding protein	Match
NC_009337.1	285400	284816	bacteriochlorophyll 4-vinyl reductase	Match
NC_009337.1	287196	285397	hypothetical protein	Match
NC_009337.1	287324	288793	starch synthase	Match
NC_009337.1	288797	289381	HAD-IIIA family hydrolase	Match
NC_009337.1	289401	290522	radical SAM family heme chaperone HemW	Match
NC_009337.1	290545	293193	DUF2723 domain-containing protein	Match
NC_009337.1	293200	293997	acyl-ACP--UDP-N-acetylglucosamine O-acyltransferase	Match
NC_009337.1	294034	295023	ROK family protein	Match
NC_009337.1	295043	295735	ComF family protein	Match
NC_009337.1	295745	296488	16S rRNA (uracil(1498)-N(3))-methyltransferase	Match
NC_009337.1	296540	297622	AI-2E family transporter	Match
NC_009337.1	298120	297698	nucleoside-diphosphate kinase	Match
NC_009337.1	298640	298194	peroxiredoxin	Match
NC_009337.1	299992	298637	HlyC/CorC family transporter	Match
NC_009337.1	300237	302276	hypothetical protein	Match
NC_009337.1	302452	303021	helix-turn-helix domain-containing protein	No match	General function
NC_009337.1	303297	304226	cysteine synthase A	Match
NC_009337.1	304260	305456	cysteine desulfurase	Match
NC_009337.1	305440	306051	iron-sulfur cluster assembly scaffold protein	Match
NC_009337.1	306061	307407	tRNA (N6-isopentenyl adenosine(37)-C2)-methylthiotransferase MiaB	Match
NC_009337.1	307485	308489	UbiA family prenyltransferase	Match
NC_009337.1	308518	309201	phosphatidate cytidylyltransferase	Match
NC_009337.1	309226	309963	UDP-2,3-diacylglucosamine diphosphatase	Match
NC_009337.1	309980	310864	ATP phosphoribosyltransferase	Match
NC_009337.1	310955	312103	glycosyltransferase	Match
NC_009337.1	312223	313182	WD40 repeat domain-containing protein	Match
NC_009337.1	313373	313582	cold-shock protein	Match
NC_009337.1	313759	314364	haloacid dehalogenase	Match
NC_009337.1	314361	314780	aminoacyl-tRNA hydrolase	Match
NC_009337.1	316142	314790	M23 family metallopeptidase	Match
NC_009337.1	316349	317272	DUF4438 domain-containing protein	Match
NC_009337.1	317373	317792	Hsp20/alpha crystallin family protein	Match
NC_009337.1	319512	317872	magnesium-protoporphyrin IX monomethyl ester anaerobic oxidative cyclase	Match
NC_009337.1	320352	319654	magnesium protoporphyrin IX methyltransferase	Match
NC_009337.1	324273	320389	magnesium chelatase subunit H	Partial match
NC_009337.1	324797	324369	hypothetical protein	Partial match
NC_009337.1	328715	324912	magnesium chelatase subunit H	Match
NC_009337.1	331347	328876	TonB-dependent receptor	Partial match
NC_009337.1	332760	331546	pyridoxal phosphate-dependent aminotransferase family protein	Match
NC_009337.1	332958	333950	NAD-dependent epimerase/dehydratase family protein	Partial match
NC_009337.1	334398	337124	autotransporter outer membrane beta-barrel domain-containing protein	Match
NC_009337.1	338182	337142	DNA polymerase III subunit delta	Match
NC_009337.1	338760	338254	single-stranded DNA-binding protein	Match
NC_009337.1	339699	338908	dihydroorotate dehydrogenase electron transfer subunit	Match
NC_009337.1	339911	341110	TRC40/GET3/ArsA family transport-energizing ATPase	Match
NC_009337.1	341250	341669	chlorosome protein C	Match
NC_009337.1	341793	342035	bacteriochlorophyll c-binding protein	Match
NC_009337.1	342292	343632	hypothetical protein	Partial match
NC_009337.1	343699	344853	ArsA family ATPase	Match
NC_009337.1	345428	344907	2-amino-4-hydroxy-6-hydroxymethyldihydropteridine diphosphokinase	Match
NC_009337.1	345811	345434	dihydroneopterin aldolase	Match
NC_009337.1	346023	346907	carboxylating nicotinate-nucleotide diphosphorylase	Match
NC_009337.1	346915	347292	holo-[acyl-carrier-protein] synthase	Partial match
NC_009337.1	348750	347467	trigger factor	Match
NC_009337.1	350069	348834	insulinase family protein	Match
NC_009337.1	350245	351234	NAD-dependent epimerase/dehydratase family protein	Match
NC_009337.1	351274	352323	recombinase RecA	Match
NC_009337.1	352333	353397	tRNA dihydrouridine synthase DusB	Match
NC_009337.1	353394	354416	aspartate-semialdehyde dehydrogenase	Match
NC_009337.1	355289	354432	hypothetical protein	Match
NC_009337.1	355804	355289	helix-hairpin-helix domain-containing protein	Match
NC_009337.1	356977	355871	alanine racemase	Match
NC_009337.1	357329	358702	pyridoxal-phosphate dependent enzyme	Match
NC_009337.1	358839	359402	hypothetical protein	Match
NC_009337.1	359429	359626	30S ribosomal protein S21	Match
NC_009337.1	359701	361002	3-phosphoshikimate 1-carboxyvinyltransferase	Match
NC_009337.1	361788	361012	alpha/beta fold hydrolase	Match
NC_009337.1	362118	361795	YtxH domain-containing protein	Match
NC_009337.1	363601	362192	HD domain-containing protein	Match
NC_009337.1	364389	363646	LPS export ABC transporter ATP-binding protein	Partial match
NC_009337.1	364729	364382	NINE protein	Match
NC_009337.1	364919	365434	gamma carbonic anhydrase family protein	Match
NC_009337.1	365592	366785	NAD(P)-binding protein	Match
NC_009337.1	366790	367887	mechanosensitive ion channel	Partial match
NC_009337.1	368014	368442	peptidylprolyl isomerase	Match
NC_009337.1	369724	368474	U32 family peptidase	Match
NC_009337.1	369846	370358	hypothetical protein	Match
NC_009337.1	370391	371155	RNA methyltransferase	Match
NC_009337.1	371935	371168	TerC family protein	Match
NC_009337.1	372031	372786	patatin-like phospholipase family protein	Partial match
NC_009337.1	372927	373391	YbaK/EbsC family protein	Match
NC_009337.1	373486	374604	glycosyltransferase family 1 protein	Match
NC_009337.1	374923	374669	chlorosome protein E	Match
NC_009337.1	375298	375071	hypothetical protein	Match
NC_009337.1	377017	375599	B12-binding domain-containing radical SAM protein	Match
NC_009337.1	377253	377726	2-vinyl bacteriochlorophyllide hydratase	Match
NC_009337.1	377789	378004	hypothetical protein	Partial match
NC_009337.1	378001	378780	SDR family oxidoreductase	No match	Other metabolism
NC_009337.1	378938	381547	response regulator	No match	Cell signaling
NC_009337.1	381574	382473	decarboxylating 6-phosphogluconate dehydrogenase	No match	Other metabolism
NC_009337.1	382551	383975	glucose-6-phosphate dehydrogenase	Match
NC_009337.1	384760	383966	6-phosphogluconolactonase	Match
NC_009337.1	384891	385541	YukJ family protein	Match
NC_009337.1	385565	386158	hypothetical protein	Match
NC_009337.1	386300	386971	murein L,D-transpeptidase catalytic domain family protein	Match
NC_009337.1	386981	388633	L,D-transpeptidase family protein	Partial match
NC_009337.1	388637	389107	SRPBCC family protein	Match
NC_009337.1	392808	389134	methionine synthase	Match
NC_009337.1	393573	392911	phospholipase	Match
NC_009337.1	394661	393588	tRNA 2-thiouridine(34) synthase MnmA	Match
NC_009337.1	396340	394667	electron transfer flavoprotein	Match
NC_009337.1	397763	396381	magnesium transporter	Match
NC_009337.1	398454	397864	DNA-3-methyladenine glycosylase	Match
NC_009337.1	398553	399350	ParA family protein	Match
NC_009337.1	399377	400264	ParB/RepB/Spo0J family partition protein	Match
NC_009337.1	400314	401060	4-hydroxy-tetrahydrodipicolinate reductase	Match
NC_009337.1	401067	401579	hypothetical protein	Match
NC_009337.1	402972	401557	o-succinylbenzoate--CoA ligase	Match
NC_009337.1	404033	402960	o-succinylbenzoate synthase	Match
NC_009337.1	404851	404030	1,4-dihydroxy-2-naphthoyl-CoA synthase	Match
NC_009337.1	405684	404848	2-succinyl-6-hydroxy-2,4-cyclohexadiene-1-carboxylate synthase	Match
NC_009337.1	406457	405735	uridine kinase	Match
NC_009337.1	408317	406566	2-succinyl-5-enolpyruvyl-6-hydroxy-3-cyclohexene-1-carboxylic-acid synthase	Match
NC_009337.1	409738	408314	isochorismate synthase	Match
NC_009337.1	410381	409776	tetratricopeptide repeat protein	Match
NC_009337.1	410620	411363	NYN domain-containing protein	Match
NC_009337.1	411488	411414	tRNA-Asp	Match
NC_009337.1	411654	412997	citrate synthase	Match
NC_009337.1	413050	413337	Asp-tRNA(Asn)/Glu-tRNA(Gln) amidotransferase subunit GatC	Match
NC_009337.1	413340	413642	DUF167 domain-containing protein	Match
NC_009337.1	413671	414414	3-deoxy-manno-octulosonate cytidylyltransferase	Match
NC_009337.1	415600	414392	exodeoxyribonuclease VII large subunit	Match
NC_009337.1	415719	416684	SPOR domain-containing protein	Match
NC_009337.1	416704	417927	chlorophyllide a reductase subunit Y	Match
NC_009337.1	418474	417914	ribosome recycling factor	Match
NC_009337.1	418751	418524	50S ribosomal protein L31	Match
NC_009337.1	418857	420974	ATP-dependent DNA helicase RecG	Match
NC_009337.1	421007	421972	ribosome small subunit-dependent GTPase A	Match
NC_009337.1	422082	423455	NAD-dependent succinate-semialdehyde dehydrogenase	Match
NC_009337.1	424736	423519	hypothetical protein	Match
NC_009337.1	425153	426397	transferase	Match
NC_009337.1	426419	426982	aminodeoxychorismate/anthranilate synthase component II	Match
NC_009337.1	427095	427739	TIGR00730 family Rossman fold protein	Match
NC_009337.1	428190	427747	heme-binding domain-containing protein	Match
NC_009337.1	428223	428546	transcriptional regulator	Match
NC_009337.1	430258	428567	bacillithiol biosynthesis cysteine-adding enzyme BshC	Match
NC_009337.1	431042	430263	5'/3'-nucleotidase SurE	Match
NC_009337.1	433685	431061	BamA/TamA family outer membrane protein	Match
NC_009337.1	433962	434807	acetyl-CoA carboxylase carboxyltransferase subunit beta	Partial match
NC_009337.1	435528	434878	FAD-dependent thymidylate synthase	No match	Other metabolism
NC_009337.1	435802	454140	tandem-95 repeat protein	No match	Hypothetical
NC_009337.1	454203	456023	TolC family protein	No match	Transport
NC_009337.1	456020	461764	hypothetical protein	No match	Hypothetical
NC_009337.1	461779	462546	efflux RND transporter periplasmic adaptor subunit	No match	Transport
NC_009337.1	462558	463925	HlyD family efflux transporter periplasmic adaptor subunit	No match	Transport
NC_009337.1	463910	466048	biotin/lipoyl-binding protein	No match	General function
NC_009337.1	466382	467911	hypothetical protein	No match	Hypothetical
NC_009337.1	468273	470867	TolC family protein	No match	Transport
NC_009337.1	471626	470898	response regulator transcription factor	No match	Transcription regulation
NC_009337.1	473656	471629	sensor histidine kinase	No match	Cell signaling
NC_009337.1	475713	473653	histidine kinase	No match	Cell signaling
NC_009337.1	475930	498102	DUF4347 domain-containing protein	No match	Hypothetical
NC_009337.1	498312	509351	tandem-95 repeat protein	No match	Hypothetical
NC_009337.1	509385	511541	type I secretion system permease/ATPase	No match	Transport
NC_009337.1	511653	511931	hypothetical protein	No match	Hypothetical
NC_009337.1	512042	513448	HlyD family type I secretion periplasmic adaptor subunit	No match	Transport
NC_009337.1	513455	514210	trypsin-like peptidase domain-containing protein	No match	General function
NC_009337.1	514374	514532	hypothetical protein	No match	Hypothetical
NC_009337.1	514595	515272	ATP-dependent Clp endopeptidase proteolytic subunit ClpP	Match
NC_009337.1	515307	518015	valine--tRNA ligase	Match
NC_009337.1	518154	519053	sigma-70 family RNA polymerase sigma factor	Match
NC_009337.1	520275	519193	LPS export ABC transporter permease LptG	Match
NC_009337.1	523233	520285	insulinase family protein	Match
NC_009337.1	523396	525465	excinuclease ABC subunit UvrB	Match
NC_009337.1	525572	527776	bifunctional (p)ppGpp synthetase/guanosine-3',5'-bis(diphosphate) 3'-pyrophosphohydrolase	Match
NC_009337.1	527829	528416	LemA family protein	Match
NC_009337.1	528410	529141	hypothetical protein	Match
NC_009337.1	529171	529806	hypothetical protein	Match
NC_009337.1	529920	531017	glycine cleavage system aminomethyltransferase GcvT	Match
NC_009337.1	531116	533458	DNA translocase FtsK	Match
NC_009337.1	533729	533469	NifU family protein	Match
NC_009337.1	534996	533857	Mrp/NBP35 family ATP-binding protein	Match
NC_009337.1	536350	535040	ribosome biogenesis GTPase Der	Match
NC_009337.1	536497	536946	50S ribosomal protein L13	Match
NC_009337.1	536968	537357	30S ribosomal protein S9	Match
NC_009337.1	537516	538289	30S ribosomal protein S2	Partial match
NC_009337.1	538327	539193	elongation factor Ts	Match
NC_009337.1	539262	539972	UMP kinase	Match
NC_009337.1	540490	539963	recombination regulator RecX	Partial match
NC_009337.1	540673	542790	bifunctional aldolase/short-chain dehydrogenase	Match
NC_009337.1	542864	543745	3-hydroxy-5-phosphonooxypentane-2,4-dione thiolase	Match
NC_009337.1	543823	545133	ribulose-bisphosphate carboxylase	Match
NC_009337.1	545120	545944	SDR family oxidoreductase	Match
NC_009337.1	545963	546457	LptE family protein	Match
NC_009337.1	546484	546921	HEPN domain-containing protein	Partial match
NC_009337.1	547011	547889	glucose-1-phosphate thymidylyltransferase RfbA	Match
NC_009337.1	547950	548534	dTDP-4-dehydrorhamnose 3,5-epimerase	Match
NC_009337.1	548531	549391	dTDP-4-dehydrorhamnose reductase	Match
NC_009337.1	549404	550456	dTDP-glucose 4,6-dehydratase	Match
NC_009337.1	550475	551443	UDP-glucose 4-epimerase GalE	Match
NC_009337.1	551440	552855	mannose-1-phosphate guanylyltransferase/mannose-6-phosphate isomerase	Match
NC_009337.1	552955	553182	hypothetical protein	Match
NC_009337.1	553352	556603	isoleucine--tRNA ligase	Match
NC_009337.1	556671	557108	TraR/DksA family transcriptional regulator	Match
NC_009337.1	558695	557202	amidophosphoribosyltransferase	Match
NC_009337.1	558924	558852	tRNA-Ala	Match
NC_009337.1	559037	559921	cell division protein FtsX	Match
NC_009337.1	560775	559936	deoxyribonuclease IV	Match
NC_009337.1	561758	560772	glycosyltransferase family 2 protein	Match
NC_009337.1	562505	561834	radical SAM protein	Match
NC_009337.1	563104	562502	phosphoribosylglycinamide formyltransferase	Match
NC_009337.1	563210	564784	bifunctional phosphoribosylaminoimidazolecarboxamide formyltransferase/IMP cyclohydrolase	Match
NC_009337.1	566437	565154	IS110 family transposase	No match	Mobile element
NC_009337.1	567620	566673	tRNA epoxyqueuosine(34) reductase QueG	Partial match
NC_009337.1	567717	569642	Rieske 2Fe-2S domain-containing protein	Match
NC_009337.1	570849	569620	serine hydrolase	Match
NC_009337.1	571708	570827	MCE family protein	Match
NC_009337.1	572465	571731	ATP-binding cassette domain-containing protein	Match
NC_009337.1	573264	572470	ABC transporter permease	Match
NC_009337.1	574237	573377	PHP domain-containing protein	Match
NC_009337.1	575207	574359	undecaprenyl-diphosphatase UppP	Match
NC_009337.1	575885	575223	RdgB/HAM1 family non-canonical purine NTP pyrophosphatase	Match
NC_009337.1	576594	575887	pyridoxine 5'-phosphate synthase	Match
NC_009337.1	576696	579059	DNA mismatch repair protein MutS	Match
NC_009337.1	579174	579770	CDP-diacylglycerol--glycerol-3-phosphate 3-phosphatidyltransferase	Match
NC_009337.1	579767	580264	phosphatidylglycerophosphatase A	Match
NC_009337.1	582150	580243	1-deoxy-D-xylulose-5-phosphate synthase	Match
NC_009337.1	582589	582164	YjbQ family protein	Match
NC_009337.1	584057	582615	alpha-amylase	Match
NC_009337.1	584267	586453	UvrD-helicase domain-containing protein	Match
NC_009337.1	586492	587523	hypothetical protein	Match
NC_009337.1	587547	588125	nitroreductase family protein	Match
NC_009337.1	588143	588727	leucyl/phenylalanyl-tRNA--protein transferase	Match
NC_009337.1	588794	590095	ArsA family ATPase	Match
NC_009337.1	590245	591126	enoyl-ACP reductase	Match
NC_009337.1	591416	593641	NADP-dependent isocitrate dehydrogenase	Match
NC_009337.1	593803	594618	TIGR00282 family metallophosphoesterase	Match
NC_009337.1	595683	594682	class 1 fructose-bisphosphatase	Match
NC_009337.1	595863	597587	single-stranded-DNA-specific exonuclease RecJ	Partial match
NC_009337.1	598575	597637	flippase-like domain-containing protein	Partial match
NC_009337.1	599452	598520	glycosyltransferase family 2 protein	Match
NC_009337.1	601010	599463	glycosyltransferase family 39 protein	Match
NC_009337.1	601614	601003	phosphatase PAP2 family protein	Match
NC_009337.1	601705	602583	formyltetrahydrofolate deformylase	Match
NC_009337.1	602651	603196	lipocalin	No match	Transport
NC_009337.1	603186	603455	hypothetical protein	No match	Hypothetical
NC_009337.1	603637	604740	LbtU family siderophore porin	No match	Transport
NC_009337.1	604768	605091	ferrous iron transport protein A	No match	Transport
NC_009337.1	605088	605315	ferrous iron transport protein A	No match	Transport
NC_009337.1	605312	607699	Fe(2+) transporter permease subunit FeoB	No match	Transport
NC_009337.1	607786	608016	hypothetical protein	No match	Hypothetical
NC_009337.1	608083	608436	hypothetical protein	No match	Hypothetical
NC_009337.1	608483	608989	flavodoxin	No match	Other metabolism
NC_009337.1	609052	609654	ferritin	Match
NC_009337.1	609706	610059	DUF2023 family protein	Partial match
NC_009337.1	611234	610149	NAD(P)-dependent oxidoreductase	Partial match
NC_009337.1	612971	611250	thiol reductant ABC exporter subunit CydC	Match
NC_009337.1	614707	612968	thiol reductant ABC exporter subunit CydD	Match
NC_009337.1	615760	614747	cytochrome d ubiquinol oxidase subunit II	Match
NC_009337.1	617134	615779	cytochrome ubiquinol oxidase subunit I	Match
NC_009337.1	618359	617298	S-methyl-5-thioribose-1-phosphate isomerase	Match
NC_009337.1	619199	618378	purine-nucleoside phosphorylase	Match
NC_009337.1	620009	619311	YggS family pyridoxal phosphate-dependent enzyme	Match
NC_009337.1	620507	620016	peptidylprolyl isomerase	Match
NC_009337.1	621218	620544	tetratricopeptide repeat protein	Match
NC_009337.1	622110	621337	TatD family hydrolase	Match
NC_009337.1	622609	622100	signal peptidase II	Match
NC_009337.1	623516	622644	shikimate dehydrogenase	Match
NC_009337.1	624910	623513	tetratricopeptide repeat protein	Match
NC_009337.1	626895	625027	excinuclease ABC subunit C	Match
NC_009337.1	628774	627002	cation acetate symporter	Match
NC_009337.1	629080	628823	DUF4212 domain-containing protein	Match
NC_009337.1	629660	629256	DUF302 domain-containing protein	No match	Hypothetical
NC_009337.1	630989	629895	hypothetical protein	No match	Hypothetical
NC_009337.1	631211	631717	NUDIX domain-containing protein	No match	General function
NC_009337.1	632330	631788	acyloxyacyl hydrolase	No match	Other metabolism
NC_009337.1	633306	632374	aspartate carbamoyltransferase catalytic subunit	Partial match
NC_009337.1	635362	633404	ABC-F family ATP-binding cassette domain-containing protein	Match
NC_009337.1	635628	636908	TolC family protein	Match
NC_009337.1	636892	637866	HlyD family efflux transporter periplasmic adaptor subunit	Match
NC_009337.1	637863	639848	MacB family efflux pump subunit	Match
NC_009337.1	641391	640216	ADP-forming succinate--CoA ligase subunit beta	Match
NC_009337.1	641604	642065	nucleoside deaminase	Match
NC_009337.1	643063	642062	hypothetical protein	Match
NC_009337.1	644418	643159	nitronate monooxygenase	Match
NC_009337.1	644737	645480	2,3-diphosphoglycerate-dependent phosphoglycerate mutase	Match
NC_009337.1	645591	650192	glutamate synthase large subunit	Match
NC_009337.1	650244	651725	glutamate synthase subunit beta	Match
NC_009337.1	651816	652088	DUF4404 family protein	Match
NC_009337.1	652131	653447	ATP-dependent Clp protease ATP-binding subunit ClpX	Match
NC_009337.1	653522	653595	tRNA-Val	Match
NC_009337.1	654539	653826	prepilin peptidase	No match	Other metabolism
NC_009337.1	655488	654547	type II secretion system F family protein	No match	Transport
NC_009337.1	656474	655506	type II secretion system F family protein	No match	Transport
NC_009337.1	657925	656486	CpaF family protein	No match	Membrane protein
NC_009337.1	659046	657901	AAA family ATPase	No match	General function
NC_009337.1	660123	659053	hypothetical protein	No match	Hypothetical
NC_009337.1	660560	660126	pilus assembly protein	No match	Membrane protein
NC_009337.1	661933	660557	type II and III secretion system protein family protein	No match	Transport
NC_009337.1	662769	661981	Flp pilus assembly protein CpaB	No match	Membrane protein
NC_009337.1	662963	662781	Flp family type IVb pilin	No match	Membrane protein
NC_009337.1	663677	663360	cupin domain-containing protein	Partial match
NC_009337.1	663813	665654	protein-disulfide reductase DsbD	Match
NC_009337.1	665741	668125	ribonuclease R	Match
NC_009337.1	669480	668122	deoxyribodipyrimidine photo-lyase	Match
NC_009337.1	670205	669477	type 1 glutamine amidotransferase	Partial match
NC_009337.1	670593	670219	rhodanese-like domain-containing protein	No match	General function
NC_009337.1	671308	671222	tRNA-Ser	Match
NC_009337.1	672535	671384	transporter substrate-binding domain-containing protein	Match
NC_009337.1	672695	672620	tRNA-Gly	Match
NC_009337.1	674006	672807	tryptophan synthase subunit beta	Match
NC_009337.1	674152	676812	LPS-assembly protein LptD	Partial match
NC_009337.1	677691	676822	alpha/beta fold hydrolase	Match
NC_009337.1	677840	678253	Rrf2 family transcriptional regulator	Match
NC_009337.1	678275	681139	excinuclease ABC subunit UvrA	Match
NC_009337.1	681455	681150	hypothetical protein	Match
NC_009337.1	681616	681903	co-chaperone GroES	Match
NC_009337.1	681954	683597	chaperonin GroEL	Match
NC_009337.1	683701	684384	7-cyano-7-deazaguanine synthase QueC	Match
NC_009337.1	684446	685138	CPBP family intramembrane metalloprotease	Match
NC_009337.1	685152	685955	tryptophan synthase subunit alpha	Match
NC_009337.1	685972	686997	glycosyltransferase family 2 protein	Match
NC_009337.1	688038	687004	aldehyde reductase	Partial match
NC_009337.1	688131	689111	calcium/sodium antiporter	Partial match
NC_009337.1	690515	689136	cation transporter	Match
NC_009337.1	690681	691811	N-acetyl-alpha-D-glucosaminyl L-malate synthase BshA	Match
NC_009337.1	692917	691889	rod shape-determining protein	Match
NC_009337.1	693122	694453	histidinol dehydrogenase	Match
NC_009337.1	694450	695475	tRNA preQ1(34) S-adenosylmethionine ribosyltransferase-isomerase QueA	Match
NC_009337.1	695663	698233	bifunctional aconitate hydratase 2/2-methylisocitrate dehydratase	Match
NC_009337.1	698382	698579	hypothetical protein	Match
NC_009337.1	699918	698779	GAF domain-containing protein	No match	General function
NC_009337.1	700638	700090	phosphatase PAP2 family protein	No match	Other metabolism
NC_009337.1	701035	701298	helix-turn-helix transcriptional regulator	No match	Transcription regulation
NC_009337.1	701629	703359	capsule biosynthesis protein	No match	Other metabolism
NC_009337.1	703398	704429	LPS biosynthesis protein	No match	Cell wall biosynthesis
NC_009337.1	704447	705820	hypothetical protein	No match	Hypothetical
NC_009337.1	706376	707488	LPS biosynthesis protein	No match	Cell wall biosynthesis
NC_009337.1	707528	708628	glycosyl transferase	No match	Cell wall modification
NC_009337.1	710607	708658	tyrosine-type recombinase/integrase	No match	Mobile element
NC_009337.1	710854	711672	hypothetical protein	No match	Hypothetical
NC_009337.1	711669	712286	nucleotidyl transferase AbiEii/AbiGii toxin family protein	No match	Cell defence
NC_009337.1	712512	712922	hypothetical protein	No match	Hypothetical
NC_009337.1	713073	713312	hypothetical protein	No match	Hypothetical
NC_009337.1	713824	715212	ATP-binding protein	No match	General function
NC_009337.1	715491	715814	hypothetical protein	No match	Hypothetical
NC_009337.1	715811	716773	GDP-L-fucose synthase	Partial match
NC_009337.1	716786	717901	GDP-mannose 4,6-dehydratase	Partial match
NC_009337.1	718023	719726	ATP-binding cassette domain-containing protein	No match	Transport
NC_009337.1	721283	720063	ISL3 family transposase	No match	Mobile element
NC_009337.1	721520	722239	hypothetical protein	No match	Hypothetical
NC_009337.1	722414	723169	hypothetical protein	No match	Hypothetical
NC_009337.1	723194	723688	hypothetical protein	No match	Hypothetical
NC_009337.1	723655	723948	FkbM family methyltransferase	No match	General function
NC_009337.1	725242	724016	ISL3 family transposase	No match	Mobile element
NC_009337.1	725315	725851	DUF268 domain-containing protein	No match	Hypothetical
NC_009337.1	726096	726821	FkbM family methyltransferase	No match	General function
NC_009337.1	726829	727686	alpha-1,2-fucosyltransferase	No match	Other metabolism
NC_009337.1	727683	728600	hypothetical protein	No match	Hypothetical
NC_009337.1	728597	729112	hypothetical protein	No match	Hypothetical
NC_009337.1	729096	729578	hypothetical protein	No match	Hypothetical
NC_009337.1	729473	731158	hypothetical protein	No match	Hypothetical
NC_009337.1	731174	732121	SDR family oxidoreductase	No match	Other metabolism
NC_009337.1	732123	733670	glycosyltransferase family 2 protein	No match	Cell wall modification
NC_009337.1	733714	734622	sulfate adenylyltransferase subunit CysD	No match	Sulfur cycling
NC_009337.1	734622	736541	sulfate adenylyltransferase subunit CysN	No match	Sulfur cycling
NC_009337.1	736550	737341	3'(2'),5'-bisphosphate nucleotidase CysQ	No match	Sulfur cycling
NC_009337.1	737338	739119	SLC13 family permease	No match	Transport
NC_009337.1	739128	739664	hypothetical protein	No match	Hypothetical
NC_009337.1	739677	740270	adenylyl-sulfate kinase	No match	Sulfur cycling
NC_009337.1	740611	740970	sulfotransferase family 2 domain-containing protein	No match	Other metabolism
NC_009337.1	741132	742340	AAA family ATPase	No match	General function
NC_009337.1	742352	742957	DUF4276 family protein	No match	Hypothetical
NC_009337.1	743072	743671	hypothetical protein	No match	Hypothetical
NC_009337.1	743920	744897	glycosyltransferase	No match	Cell wall modification
NC_009337.1	745516	745253	transposase	No match	Mobile element
NC_009337.1	745645	747144	hypothetical protein	No match	Hypothetical
NC_009337.1	747156	748304	O-antigen polymerase	No match	Cell wall modification
NC_009337.1	748270	749088	glycosyltransferase family 2 protein	No match	Cell wall modification
NC_009337.1	749242	749727	transposase	No match	Mobile element
NC_009337.1	749757	750623	DDE-type integrase/transposase/recombinase	No match	Mobile element
NC_009337.1	750790	750963	hypothetical protein	No match	Hypothetical
NC_009337.1	750976	751827	glycosyltransferase	No match	Cell wall modification
NC_009337.1	751937	752929	NAD-dependent epimerase/dehydratase family protein	No match	General function
NC_009337.1	752978	753472	WbuC family cupin fold metalloprotein	No match	Other metabolism
NC_009337.1	753625	754158	hypothetical protein	No match	Hypothetical
NC_009337.1	755054	755389	helix-turn-helix domain-containing protein	No match	General function
NC_009337.1	755382	756628	type II toxin-antitoxin system HipA family toxin	No match	Cell defence
NC_009337.1	757201	756863	hypothetical protein	No match	Hypothetical
NC_009337.1	757560	757213	addiction module protein	No match	Cell defence
NC_009337.1	757612	758079	hypothetical protein	No match	Hypothetical
NC_009337.1	758955	758323	RES family NAD+ phosphorylase	No match	Cell defence
NC_009337.1	759367	758987	DUF2384 domain-containing protein	No match	Hypothetical
NC_009337.1	760914	759958	HipA domain-containing protein	No match	Cell defence
NC_009337.1	761241	760918	phosphatidylinositol kinase	No match	Other metabolism
NC_009337.1	761451	761245	helix-turn-helix transcriptional regulator	No match	General function
NC_009337.1	761973	761779	hypothetical protein	No match	Hypothetical
NC_009337.1	762267	761974	putative addiction module antidote protein	No match	Cell defence
NC_009337.1	762569	762264	type II toxin-antitoxin system RelE/ParE family toxin	No match	Cell defence
NC_009337.1	764518	763010	Fic family protein	No match	Post-translation modification
NC_009337.1	764859	764569	transposase	No match	Mobile element
NC_009337.1	764993	765592	hypothetical protein	No match	Hypothetical
NC_009337.1	765589	766251	nucleotidyl transferase AbiEii/AbiGii toxin family protein	No match	Cell defence
NC_009337.1	766284	766769	helix-turn-helix domain-containing protein	No match	General function
NC_009337.1	767099	768331	UPF0149 family protein	No match	Hypothetical
NC_009337.1	768404	769315	lysophospholipid acyltransferase family protein	Partial match
NC_009337.1	769472	771394	ABC transporter ATP-binding protein	Partial match
NC_009337.1	771663	772589	hypothetical protein	No match	Hypothetical
NC_009337.1	774586	772607	hypothetical protein	No match	Hypothetical
NC_009337.1	775683	774583	glycosyltransferase family 4 protein	No match	Cell wall modification
NC_009337.1	776686	775694	glycosyltransferase family 4 protein	No match	Cell wall modification
NC_009337.1	778117	776750	hypothetical protein	No match	Hypothetical
NC_009337.1	779032	778142	glycosyltransferase family 4 protein	No match	Cell wall modification
NC_009337.1	779918	779214	HAD family phosphatase	No match	General function
NC_009337.1	780684	779911	3-deoxy-manno-octulosonate cytidylyltransferase	No match	Cell wall biosynthesis
NC_009337.1	781723	780686	glycosyltransferase family 2 protein	Partial match
NC_009337.1	782903	781725	glycosyltransferase family 4 protein	Partial match
NC_009337.1	783166	782900	hypothetical protein	Partial match
NC_009337.1	784188	783196	glycosyltransferase	Partial match
NC_009337.1	785497	784175	nucleotide sugar dehydrogenase	Match
NC_009337.1	786483	785494	family 43 glycosylhydrolase	Match
NC_009337.1	787631	786537	glycosyltransferase family 9 protein	Partial match
NC_009337.1	787871	788524	hypothetical protein	Partial match
NC_009337.1	789678	788557	glycosyltransferase	Match
NC_009337.1	790764	789691	glycosyltransferase	No match	Cell wall modification
NC_009337.1	790950	791561	PhoP regulatory network protein YrbL	No match	Transcription regulation
NC_009337.1	792780	791716	glycosyltransferase	Partial match
NC_009337.1	792863	793777	CPBP family intramembrane metalloprotease	Partial match
NC_009337.1	793788	794603	phosphatidate cytidylyltransferase	Match
NC_009337.1	794766	795236	PTS sugar transporter subunit IIA	Match
NC_009337.1	795266	796546	histidine--tRNA ligase	Partial match
NC_009337.1	796556	796810	glutaredoxin family protein	No match	General function
NC_009337.1	798418	796910	lysine--tRNA ligase	Partial match
NC_009337.1	799407	798472	phytoene/squalene synthase family protein	Match
NC_009337.1	799483	800889	GTPase HflX	Match
NC_009337.1	800894	801340	rRNA maturation RNase YbeY	Match
NC_009337.1	801337	801528	CPXCG motif-containing cysteine-rich protein	Match
NC_009337.1	801943	801538	RNase P RNA component class A	Match
NC_009337.1	802808	802008	hypothetical protein	Match
NC_009337.1	803048	802967	tRNA-Leu	Match
NC_009337.1	803277	803095	50S ribosomal protein L33	Match
NC_009337.1	803435	804703	diaminopimelate decarboxylase	Match
NC_009337.1	805566	807896	ComEC family competence protein	Match
NC_009337.1	805598	804729	methylenetetrahydrofolate reductase [NAD(P)H]	Match
NC_009337.1	808149	807877	hypothetical protein	Match
NC_009337.1	808712	808146	NUDIX hydrolase	Partial match
NC_009337.1	810073	808709	ABC transporter permease	Match
NC_009337.1	810832	810221	50S ribosomal protein L25/general stress protein Ctc	Match
NC_009337.1	811836	810865	ribose-phosphate pyrophosphokinase	Match
NC_009337.1	812032	813087	UDP-3-O-(3-hydroxymyristoyl)glucosamine N-acyltransferase	Match
NC_009337.1	813496	813101	hypothetical protein	Match
NC_009337.1	814322	813633	OmpA family protein	Match
NC_009337.1	815727	814492	FtsX-like permease family protein	Match
NC_009337.1	817004	815739	FtsX-like permease family protein	Match
NC_009337.1	817690	817001	ABC transporter ATP-binding protein	Match
NC_009337.1	818917	817703	efflux RND transporter periplasmic adaptor subunit	Match
NC_009337.1	820142	818931	TolC family protein	Match
NC_009337.1	821063	820467	hypothetical protein	Match
NC_009337.1	822176	821091	D-alanine--D-alanine ligase	Match
NC_009337.1	822597	822184	CoA-binding protein	Match
NC_009337.1	822778	823632	lipoate--protein ligase family protein	Partial match
NC_009337.1	823636	824469	3-methyl-2-oxobutanoate hydroxymethyltransferase	Match
NC_009337.1	824506	825306	CDP-diacylglycerol--serine O-phosphatidyltransferase	Match
NC_009337.1	825335	825589	phosphoribosylformylglycinamidine synthase subunit PurS	Match
NC_009337.1	825604	826299	phosphoribosylformylglycinamidine synthase subunit PurQ	Match
NC_009337.1	826312	827571	MFS transporter	Match
NC_009337.1	827687	828887	DNA polymerase III subunit gamma/tau	Match
NC_009337.1	828998	829525	hypothetical protein	No match	Hypothetical
NC_009337.1	829738	831021	IS110 family transposase	No match	Mobile element
NC_009337.1	831455	832558	efflux RND transporter periplasmic adaptor subunit	Match
NC_009337.1	832564	835767	efflux RND transporter permease subunit	Match
NC_009337.1	835767	837194	efflux transporter outer membrane subunit	Match
NC_009337.1	837274	838074	ferredoxin--NADP reductase	Match
NC_009337.1	838309	838839	polymer-forming cytoskeletal protein	Partial match
NC_009337.1	839011	840402	sodium:solute symporter family protein	No match	Transport
NC_009337.1	840484	840411	tRNA-Val	Match
NC_009337.1	840652	840885	hypothetical protein	Partial match
NC_009337.1	841058	841912	bifunctional methionine sulfoxide reductase B/A protein	Match
NC_009337.1	842005	842598	DUF134 domain-containing protein	Match
NC_009337.1	842595	842963	dinitrogenase iron-molybdenum cofactor biosynthesis protein	Match
NC_009337.1	843802	843002	zinc transporter ZupT	Match
NC_009337.1	844365	843799	TIGR00730 family Rossman fold protein	Match
NC_009337.1	845003	844362	glycosyltransferase family 2 protein	Match
NC_009337.1	845905	845000	chlorophyll synthase ChlG	Match
NC_009337.1	846102	846584	hypothetical protein	Match
NC_009337.1	846665	847567	D-alanyl-D-alanine carboxypeptidase	Partial match
NC_009337.1	847599	847904	Dabb family protein	Match
NC_009337.1	848150	847962	4Fe-4S binding protein	Match
NC_009337.1	848493	848305	4Fe-4S binding protein	Match
NC_009337.1	849543	848587	PhoH family protein	Match
NC_009337.1	850550	849543	ADP-glyceromanno-heptose 6-epimerase	Match
NC_009337.1	851094	850672	RNA polymerase sigma24 factor	Match
NC_009337.1	851283	852365	histidinol-phosphate transaminase	Match
NC_009337.1	852395	852904	RNA methyltransferase	Match
NC_009337.1	852963	853808	alpha/beta hydrolase	Match
NC_009337.1	854400	853828	aminoacyl-tRNA hydrolase	Match
NC_009337.1	856563	854482	sodium-translocating pyrophosphatase	Match
NC_009337.1	857261	856653	cytochrome b561	Match
NC_009337.1	858865	857258	tetrathionate reductase family octaheme c-type cytochrome	Match
NC_009337.1	860016	858991	endonuclease	Match
NC_009337.1	860125	860529	hypothetical protein	Match
NC_009337.1	860616	861326	phosphoribosylaminoimidazolesuccinocarboxamide synthase	Match
NC_009337.1	861374	862018	DedA family protein	Match
NC_009337.1	862107	863018	transketolase	Match
NC_009337.1	863034	863600	16S rRNA (guanine(966)-N(2))-methyltransferase RsmD	Match
NC_009337.1	863584	864096	pantetheine-phosphate adenylyltransferase	Match
NC_009337.1	864141	865349	pyridoxal phosphate-dependent aminotransferase	Match
NC_009337.1	865362	866153	glycerol acyltransferase	Match
NC_009337.1	866172	867149	hypothetical protein	Partial match
NC_009337.1	867184	869292	methionine--tRNA ligase	Match
NC_009337.1	869339	869411	tRNA-Met	Match
NC_009337.1	869477	870766	DUF1343 domain-containing protein	Partial match
NC_009337.1	871894	870776	cyclopropane fatty acyl phospholipid synthase	Match
NC_009337.1	872551	871988	STAS domain-containing protein	Partial match
NC_009337.1	873640	872711	DUF481 domain-containing protein	Match
NC_009337.1	874731	873802	tRNA (adenosine(37)-N6)-dimethylallyltransferase MiaA	Partial match
NC_009337.1	875318	874737	septum formation protein Maf	Match
NC_009337.1	877093	875336	Na+:solute symporter	Match
NC_009337.1	878068	877157	sugar kinase	Match
NC_009337.1	880076	878166	alpha-amylase	Match
NC_009337.1	880156	880887	tRNA pseudouridine(38-40) synthase TruA	Match
NC_009337.1	880941	882452	LysM peptidoglycan-binding domain-containing protein	Partial match
NC_009337.1	882598	883788	ArsA family ATPase	Match
NC_009337.1	883973	885022	3-deoxy-7-phosphoheptulonate synthase	Match
NC_009337.1	885060	885263	DUF2892 domain-containing protein	Match
NC_009337.1	885341	886477	hypothetical protein	Match
NC_009337.1	887261	886602	hypothetical protein	Match
NC_009337.1	887684	887343	P-II family nitrogen regulator	Match
NC_009337.1	889028	887703	ammonium transporter	Match
NC_009337.1	889285	889704	ATP-binding protein	Match
NC_009337.1	889739	891427	glucose-6-phosphate isomerase	Match
NC_009337.1	892423	891407	FAD:protein FMN transferase	Match
NC_009337.1	893038	892460	electron transport complex subunit RsxA	Match
NC_009337.1	893640	893038	electron transport complex subunit E	Match
NC_009337.1	894182	893637	RnfABCDGE type electron transport complex subunit G	Match
NC_009337.1	895153	894179	RnfABCDGE type electron transport complex subunit D	Match
NC_009337.1	896497	895172	electron transport complex subunit RsxC	Match
NC_009337.1	897331	896498	Fe-S cluster domain-containing protein	Match
NC_009337.1	897942	897511	SoxR reducing system RseC family protein	Match
NC_009337.1	899256	897949	adenylosuccinate lyase	Match
NC_009337.1	900712	899300	HD domain-containing protein	Match
NC_009337.1	901792	900734	Gfo/Idh/MocA family oxidoreductase	Match
NC_009337.1	903109	901832	tetracycline resistance MFS efflux pump	Match
NC_009337.1	904079	903183	cobalamin-binding protein	Match
NC_009337.1	904161	905858	Na/Pi cotransporter family protein	Match
NC_009337.1	905898	906121	cobalamin riboswitch	Match
NC_009337.1	906493	906733	cobalamin riboswitch	Partial match
NC_009337.1	906865	909003	ribonucleoside triphosphate reductase	Match
NC_009337.1	908943	909698	anaerobic ribonucleoside-triphosphate reductase activating protein	Partial match
NC_009337.1	909691	911028	cobyrinate a,c-diamide synthase	No match	Cobalamin synthesis
NC_009337.1	911107	911313	cobalamin riboswitch	No match	Cobalamin synthesis
NC_009337.1	911425	912396	alcohol dehydrogenase catalytic domain-containing protein	No match	General function
NC_009337.1	912476	913567	anthranilate phosphoribosyltransferase	No match	Other metabolism
NC_009337.1	913712	913952	cobalamin riboswitch	Partial match
NC_009337.1	914207	916087	TonB-dependent receptor	No match	Transport
NC_009337.1	916168	916968	ABC transporter substrate-binding protein	No match	Transport
NC_009337.1	917031	918548	cobyric acid synthase	Partial match
NC_009337.1	918545	919594	threonine-phosphate decarboxylase	Match
NC_009337.1	919587	920549	cobalamin biosynthesis protein	Match
NC_009337.1	920563	921102	cob(I)yrinic acid a,c-diamide adenosyltransferase	Match
NC_009337.1	921104	922147	iron ABC transporter permease	Match
NC_009337.1	922150	923415	ABC transporter ATP-binding protein	Match
NC_009337.1	923421	924227	sugar phosphate isomerase/epimerase	Match
NC_009337.1	924224	924745	bifunctional adenosylcobinamide kinase/adenosylcobinamide-phosphate guanylyltransferase	Match
NC_009337.1	924755	925819	nicotinate-nucleotide--dimethylbenzimidazole phosphoribosyltransferase	Match
NC_009337.1	925826	926575	adenosylcobinamide-GDP ribazoletransferase	Match
NC_009337.1	926719	927126	osmotically inducible protein C	Match
NC_009337.1	927179	928159	C4-dicarboxylate ABC transporter	Match
NC_009337.1	928179	928643	DUF134 domain-containing protein	Match
NC_009337.1	929104	928640	SET domain-containing protein	Match
NC_009337.1	929424	929197	hypothetical protein	Match
NC_009337.1	929548	930888	aminoacetone oxidase family FAD-binding enzyme	Partial match
NC_009337.1	931808	930873	hypothetical protein	Match
NC_009337.1	934092	932026	hypothetical protein	Partial match
NC_009337.1	934461	934114	YdbL family protein	Match
NC_009337.1	934676	934479	YnbE family lipoprotein	Match
NC_009337.1	935191	934673	DUF2141 domain-containing protein	Partial match
NC_009337.1	935651	935184	hypothetical protein	Match
NC_009337.1	935812	936408	nitroreductase family protein	Match
NC_009337.1	936484	936792	hypothetical protein	Match
NC_009337.1	936871	938466	UDP-N-acetylmuramate dehydrogenase	Match
NC_009337.1	939287	938472	heterodisulfide reductase subunit F	Match
NC_009337.1	940348	939335	4Fe-4S ferredoxin	Match
NC_009337.1	941191	940361	4Fe-4S ferredoxin	Match
NC_009337.1	941651	941202	hydrogenase iron-sulfur subunit	Match
NC_009337.1	943658	941688	CoB--CoM heterodisulfide reductase iron-sulfur subunit A family protein	Match
NC_009337.1	945308	943767	4Fe-4S dicluster domain-containing protein	Match
NC_009337.1	945477	945926	large-conductance mechanosensitive channel protein MscL	Match
NC_009337.1	946017	947243	LL-diaminopimelate aminotransferase	Partial match
NC_009337.1	949841	947250	carboxypeptidase regulatory-like domain-containing protein	No match	Membrane protein
NC_009337.1	950712	949885	molecular chaperone	No match	Stress response
NC_009337.1	951178	950933	hypothetical protein	No match	Hypothetical
NC_009337.1	951934	951302	hypothetical protein	No match	Hypothetical
NC_009337.1	952652	952050	hypothetical protein	No match	Hypothetical
NC_009337.1	954544	952958	bifunctional ADP-dependent NAD(P)H-hydrate dehydratase/NAD(P)H-hydrate epimerase	Partial match
NC_009337.1	956833	954548	phosphoribosylformylglycinamidine synthase subunit PurL	Match
NC_009337.1	959925	956863	preprotein translocase subunit SecA	Match
NC_009337.1	960970	960029	DNA-3-methyladenine glycosylase 2 family protein	Partial match
NC_009337.1	961950	961252	SDR family oxidoreductase	Partial match
NC_009337.1	962535	961957	hypothetical protein	Match
NC_009337.1	963432	962578	lipoyl synthase	Match
NC_009337.1	963542	964249	TetR/AcrR family transcriptional regulator	Match
NC_009337.1	964246	965157	HlyD family efflux transporter periplasmic adaptor subunit	Match
NC_009337.1	965154	966086	ABC transporter ATP-binding protein	Match
NC_009337.1	966079	966822	ABC transporter ATP-binding protein	Match
NC_009337.1	966819	967934	ABC transporter permease	Match
NC_009337.1	967968	969089	ABC transporter permease	Match
NC_009337.1	969233	970123	hypothetical protein	No match	Hypothetical
NC_009337.1	970939	971181	hypothetical protein	Match
NC_009337.1	973095	971263	ATP citrate lyase	Match
NC_009337.1	974355	973159	ATP citrate lyase	Match
NC_009337.1	974486	975340	prolipoprotein diacylglyceryl transferase	Partial match
NC_009337.1	975483	976358	protease HtpX	No match	Other metabolism
NC_009337.1	977260	976475	iron export ABC transporter permease subunit FetB	Partial match
NC_009337.1	977934	977257	ABC transporter ATP-binding protein	Match
NC_009337.1	978046	978504	GNAT family N-acetyltransferase	Match
NC_009337.1	979782	978514	ABC transporter permease	Match
NC_009337.1	981056	979785	ABC transporter permease	Match
NC_009337.1	982294	981053	GGDEF domain-containing protein	Match
NC_009337.1	983047	982304	hypothetical protein	Match
NC_009337.1	983264	984277	N-acetyl-gamma-glutamyl-phosphate reductase	Match
NC_009337.1	984381	985589	bifunctional glutamate N-acetyltransferase/amino-acid acetyltransferase ArgJ	Match
NC_009337.1	985625	986533	acetylglutamate kinase	Match
NC_009337.1	986547	987554	ornithine carbamoyltransferase	Match
NC_009337.1	987551	987997	arginine repressor	Match
NC_009337.1	988015	989217	argininosuccinate synthase	Match
NC_009337.1	989303	990688	argininosuccinate lyase	Partial match
NC_009337.1	990880	990698	hypothetical protein	No match	Hypothetical
NC_009337.1	991845	990946	alpha/beta fold hydrolase	No match	General function
NC_009337.1	995568	992008	carboxypeptidase regulatory-like domain-containing protein	No match	Membrane protein
NC_009337.1	995972	995601	hypothetical protein	No match	Hypothetical
NC_009337.1	997135	996602	DUF4402 domain-containing protein	No match	Hypothetical
NC_009337.1	998075	997350	response regulator transcription factor	No match	Transcription regulation
NC_009337.1	1000203	998176	sensor histidine kinase	No match	Cell signaling
NC_009337.1	1000553	1000281	RNA-binding protein	Match
NC_009337.1	1002786	1000704	tail-specific protease	Match
NC_009337.1	1002946	1003920	class II fructose-1,6-bisphosphate aldolase	Match
NC_009337.1	1005213	1003984	amidohydrolase	Match
NC_009337.1	1005425	1006150	helix-turn-helix domain-containing protein	Match
NC_009337.1	1006838	1006155	CBS domain-containing protein	Match
NC_009337.1	1007263	1006829	ribose 5-phosphate isomerase B	Match
NC_009337.1	1009364	1007271	polyphosphate kinase 1	Partial match
NC_009337.1	1010078	1009446	5-formyltetrahydrofolate cyclo-ligase	No match	Other metabolism
NC_009337.1	1010222	1010947	fumarylacetoacetate hydrolase family protein	Partial match
NC_009337.1	1010971	1012290	dihydroorotase	Match
NC_009337.1	1012432	1012626	hypothetical protein	Match
NC_009337.1	1012710	1013498	class I SAM-dependent methyltransferase	Match
NC_009337.1	1014178	1013513	3'-5' exonuclease	Match
NC_009337.1	1016153	1014204	CBS domain-containing protein	Match
NC_009337.1	1017189	1016194	SDR family oxidoreductase	Match
NC_009337.1	1018296	1017250	BMP family ABC transporter substrate-binding protein	Match
NC_009337.1	1018520	1020136	CHAD domain-containing protein	Match
NC_009337.1	1020133	1020876	AAA family ATPase	Match
NC_009337.1	1020889	1022304	transporter substrate-binding domain-containing protein	Match
NC_009337.1	1023646	1022309	DUF389 domain-containing protein	Match
NC_009337.1	1023919	1024509	YdcF family protein	Match
NC_009337.1	1025049	1024582	hypothetical protein	Match
NC_009337.1	1026941	1025229	exodeoxyribonuclease V subunit alpha	Match
NC_009337.1	1030449	1026946	exodeoxyribonuclease V subunit beta	Partial match
NC_009337.1	1033673	1030449	exodeoxyribonuclease V subunit gamma	Match
NC_009337.1	1034035	1033685	hypothetical protein	Partial match
NC_009337.1	1034212	1035702	SulP family inorganic anion transporter	Match
NC_009337.1	1035718	1036569	universal stress protein	Match
NC_009337.1	1036599	1037837	DEAD/DEAH box helicase	Match
NC_009337.1	1039183	1037936	DNA recombination protein RmuC	Match
NC_009337.1	1039949	1039245	hypothetical protein	No match	Hypothetical
NC_009337.1	1042642	1040177	polysaccharide deacetylase family protein	No match	Other metabolism
NC_009337.1	1044021	1042663	glycosyltransferase family 2 protein	No match	Cell wall modification
NC_009337.1	1044989	1044054	hypothetical protein	No match	Hypothetical
NC_009337.1	1045309	1045382	tRNA-Cys	Match
NC_009337.1	1046637	1045480	DegT/DnrJ/EryC1/StrS family aminotransferase	Match
NC_009337.1	1047797	1046664	iron-containing alcohol dehydrogenase	Match
NC_009337.1	1048535	1047816	acylneuraminate cytidylyltransferase family protein	Match
NC_009337.1	1049484	1048528	hypothetical protein	Match
NC_009337.1	1050545	1049484	flippase-like domain-containing protein	Match
NC_009337.1	1050813	1052645	long-chain fatty acid--CoA ligase	Match
NC_009337.1	1053504	1052665	Fe-S cluster assembly protein HesB	Match
NC_009337.1	1053938	1053573	50S ribosomal protein L19	Match
NC_009337.1	1054670	1053972	tRNA (guanosine(37)-N1)-methyltransferase TrmD	Match
NC_009337.1	1055197	1054694	16S rRNA processing protein RimM	Match
NC_009337.1	1055887	1055234	30S ribosomal protein S16	Match
NC_009337.1	1057287	1055938	signal recognition particle protein	Match
NC_009337.1	1057443	1058432	D-glycero-beta-D-manno-heptose-7-phosphate kinase	Match
NC_009337.1	1059054	1058437	START domain-containing protein	Match
NC_009337.1	1059797	1059141	cyclase	No match	General function
NC_009337.1	1061485	1059836	S41 family peptidase	No match	General function
NC_009337.1	1062679	1062188	RidA family protein	Partial match
NC_009337.1	1062778	1063422	thiamine phosphate synthase	Match
NC_009337.1	1063419	1064048	thiamine phosphate synthase	Match
NC_009337.1	1064045	1064872	bifunctional hydroxymethylpyrimidine kinase/phosphomethylpyrimidine kinase	Match
NC_009337.1	1066173	1064839	UDP-glucose/GDP-mannose dehydrogenase family protein	Match
NC_009337.1	1066903	1066202	alpha/beta hydrolase	Partial match
NC_009337.1	1068399	1066894	leucyl aminopeptidase	Match
NC_009337.1	1069501	1068434	bifunctional oligoribonuclease/PAP phosphatase NrnA	Match
NC_009337.1	1069884	1069552	transcriptional regulator	Match
NC_009337.1	1070005	1071126	23S rRNA (adenine(2503)-C(2))-methyltransferase RlmN	Match
NC_009337.1	1071142	1071843	hypothetical protein	Match
NC_009337.1	1071852	1072508	adenylate kinase	Match
NC_009337.1	1072526	1074958	primosomal protein N'	Partial match
NC_009337.1	1077244	1075124	response regulator	No match	Cell signaling
NC_009337.1	1077509	1078696	iron-containing alcohol dehydrogenase	Match
NC_009337.1	1078777	1079277	DoxX family membrane protein	Match
NC_009337.1	1079404	1080096	hypothetical protein	Match
NC_009337.1	1080557	1080102	3-dehydroquinate dehydratase	Match
NC_009337.1	1082051	1080573	ATP-dependent protease ATPase subunit HslU	Match
NC_009337.1	1082638	1082090	ATP-dependent protease subunit HslV	Match
NC_009337.1	1083986	1082643	RNA polymerase factor sigma-54	Match
NC_009337.1	1084557	1083979	DUF3109 family protein	Match
NC_009337.1	1084687	1085574	bifunctional methylenetetrahydrofolate dehydrogenase/methenyltetrahydrofolate cyclohydrolase FolD	Match
NC_009337.1	1085579	1086949	DNA repair protein RadA	Match
NC_009337.1	1087033	1087374	phage holin family protein	Match
NC_009337.1	1087408	1088364	zinc-binding alcohol dehydrogenase	Match
NC_009337.1	1088378	1089919	ABC transporter ATP-binding protein	Match
NC_009337.1	1089932	1090957	ABC transporter permease	Match
NC_009337.1	1092858	1090984	chloride channel protein	Match
NC_009337.1	1093061	1093372	DUF2934 domain-containing protein	Partial match
NC_009337.1	1093462	1093635	hypothetical protein	Match
NC_009337.1	1094400	1093666	PASTA domain-containing protein	Match
NC_009337.1	1095420	1094446	polyprenyl synthetase family protein	Match
NC_009337.1	1095656	1096540	twin-arginine translocase subunit TatC	Partial match
NC_009337.1	1096537	1097565	esterase	Match
NC_009337.1	1098198	1097548	dephospho-CoA kinase	Match
NC_009337.1	1098581	1098195	hypothetical protein	Match
NC_009337.1	1098690	1099295	superoxide dismutase	Match
NC_009337.1	1100280	1099426	DUF4292 domain-containing protein	Match
NC_009337.1	1100383	1101564	class I SAM-dependent rRNA methyltransferase	Partial match
NC_009337.1	1102224	1101646	5'-nucleotidase	Partial match
NC_009337.1	1103042	1102236	thioredoxin	Match
NC_009337.1	1104939	1103227	PAS domain S-box protein	No match	Cell signaling
NC_009337.1	1106334	1105114	ISL3 family transposase	No match	Mobile element
NC_009337.1	1107165	1106461	WYL domain-containing transcriptional regulator	Partial match
NC_009337.1	1109917	1107239	cation-translocating P-type ATPase	Match
NC_009337.1	1113648	1109995	DUF3683 domain-containing protein	Match
NC_009337.1	1114692	1113820	glycosyltransferase	Match
NC_009337.1	1115969	1114731	pentapeptide repeat-containing protein	Partial match
NC_009337.1	1117268	1115991	hypothetical protein	Match
NC_009337.1	1117683	1117249	hypothetical protein	Match
NC_009337.1	1118522	1117791	PhoU family transcriptional regulator	Match
NC_009337.1	1119365	1118679	phosphate signaling complex protein PhoU	Match
NC_009337.1	1120241	1119384	phosphate ABC transporter ATP-binding protein	Match
NC_009337.1	1121594	1120248	phosphate ABC transporter permease PstA	Match
NC_009337.1	1122825	1121662	phosphate ABC transporter permease subunit PstC	Match
NC_009337.1	1123793	1122987	phosphate ABC transporter substrate-binding protein	Match
NC_009337.1	1124729	1123914	phosphate ABC transporter substrate-binding protein	Match
NC_009337.1	1126084	1124915	hypothetical protein	Partial match
NC_009337.1	1126490	1126230	hypothetical protein	Match
NC_009337.1	1127215	1126544	hypothetical protein	Match
NC_009337.1	1128006	1127203	1-acyl-sn-glycerol-3-phosphate acyltransferase	Match
NC_009337.1	1128195	1128884	class I SAM-dependent methyltransferase	Match
NC_009337.1	1128881	1129543	HAD family hydrolase	Match
NC_009337.1	1130671	1129598	metallophosphoesterase	Match
NC_009337.1	1131403	1130690	phosphotransferase	Partial match
NC_009337.1	1131605	1132303	tRNA (guanosine(18)-2'-O)-methyltransferase TrmH	Match
NC_009337.1	1132581	1132216	hypothetical protein	Match
NC_009337.1	1132862	1132653	hypothetical protein	No match	Hypothetical
NC_009337.1	1133138	1134583	sigma-54-dependent Fis family transcriptional regulator	No match	Transcription regulation
NC_009337.1	1135522	1134587	thioredoxin-disulfide reductase	Match
NC_009337.1	1135942	1135613	thioredoxin	Match
NC_009337.1	1139598	1136035	DNA polymerase III subunit alpha	Match
NC_009337.1	1140851	1139721	glycosyltransferase family 4 protein	Match
NC_009337.1	1143229	1140869	glycoside hydrolase family 65 protein	Match
NC_009337.1	1143480	1144685	leucine-rich repeat domain-containing protein	Match
NC_009337.1	1146315	1144765	sodium ion-translocating decarboxylase subunit beta	Match
NC_009337.1	1148278	1146422	biotin attachment protein	Match
NC_009337.1	1148618	1148337	OadG family protein	Match
NC_009337.1	1150189	1148690	fumarate hydratase	Match
NC_009337.1	1150744	1150280	universal stress protein	Match
NC_009337.1	1150893	1152452	bifunctional aminoglycoside phosphotransferase/ATP-binding protein	Match
NC_009337.1	1153299	1152424	membrane protein	Match
NC_009337.1	1155218	1153341	molecular chaperone HtpG	Match
NC_009337.1	1156151	1155282	N-acetylneuraminate synthase	Match
NC_009337.1	1156713	1156189	HAD-IIIA family hydrolase	Match
NC_009337.1	1157920	1157039	polyphosphate kinase 2 family protein	Match
NC_009337.1	1158522	1157980	inorganic diphosphatase	Match
NC_009337.1	1158689	1160278	peptide chain release factor 3	Partial match
NC_009337.1	1160476	1160685	hypothetical protein	No match	Hypothetical
NC_009337.1	1162204	1160627	response regulator	Partial match
NC_009337.1	1162363	1162291	tRNA-Pro	Match
NC_009337.1	1162448	1162376	tRNA-Arg	Match
NC_009337.1	1163906	1162515	NAD(P)-binding protein	Match
NC_009337.1	1164578	1163964	recombination protein RecR	Match
NC_009337.1	1164916	1164587	YbaB/EbfC family nucleoid-associated protein	Match
NC_009337.1	1165933	1164950	transketolase family protein	Match
NC_009337.1	1166014	1166826	16S rRNA (adenine(1518)-N(6)/adenine(1519)-N(6))-dimethyltransferase RsmA	Partial match
NC_009337.1	1166911	1167336	methylmalonyl-CoA epimerase	No match	Other metabolism
NC_009337.1	1167375	1169141	methylmalonyl-CoA mutase small subunit	Match
NC_009337.1	1169138	1171207	methylmalonyl-CoA mutase	Match
NC_009337.1	1171207	1172217	methylmalonyl Co-A mutase-associated GTPase MeaB	Match
NC_009337.1	1172659	1172201	universal stress protein	Match
NC_009337.1	1173441	1172671	slipin family protein	Match
NC_009337.1	1173766	1174464	zinc metallopeptidase	No match	Other metabolism
NC_009337.1	1174483	1175187	SDR family oxidoreductase	Partial match
NC_009337.1	1175194	1175841	dTMP kinase	Match
NC_009337.1	1175986	1177248	hypothetical protein	Match
NC_009337.1	1177284	1180445	beta-phosphoglucomutase family hydrolase	Match
NC_009337.1	1180562	1181602	tRNA preQ1(34) S-adenosylmethionine ribosyltransferase-isomerase QueA	Match
NC_009337.1	1181626	1182357	2-C-methyl-D-erythritol 4-phosphate cytidylyltransferase	Match
NC_009337.1	1182416	1182492	tRNA-Met	Match
NC_009337.1	1182496	1182568	tRNA-Gly	Match
NC_009337.1	1182613	1183056	hotdog fold thioesterase	Match
NC_009337.1	1183194	1184603	B12-binding domain-containing radical SAM protein	Partial match
NC_009337.1	1186486	1184678	aspartate--tRNA ligase	Partial match
NC_009337.1	1188169	1186886	IS110 family transposase	No match	Mobile element
NC_009337.1	1188776	1188291	methylated-DNA--[protein]-cysteine S-methyltransferase	No match	Other metabolism
NC_009337.1	1189526	1188903	class I SAM-dependent methyltransferase	No match	Other metabolism
NC_009337.1	1189979	1189890	tRNA-Ser	Match
NC_009337.1	1190073	1189991	tRNA-Ser	Match
NC_009337.1	1190424	1190335	tRNA-Ser	Match
NC_009337.1	1190562	1192055	IMP dehydrogenase	Match
NC_009337.1	1195966	1192136	magnesium chelatase subunit H	Match
NC_009337.1	1197914	1196052	magnesium chelatase ATPase subunit D	Match
NC_009337.1	1199096	1197915	magnesium chelatase ATPase subunit I	Match
NC_009337.1	1200652	1199252	dihydrolipoyl dehydrogenase	Match
NC_009337.1	1200722	1201771	RluA family pseudouridine synthase	Partial match
NC_009337.1	1201829	1202353	hypothetical protein	Match
NC_009337.1	1202443	1204641	S9 family peptidase	Match
NC_009337.1	1206571	1204667	ABC-F family ATP-binding cassette domain-containing protein	Match
NC_009337.1	1206775	1207332	hypothetical protein	Partial match
NC_009337.1	1208460	1207432	radical SAM protein	No match	Other metabolism
NC_009337.1	1209540	1208506	GNAT family N-acetyltransferase	No match	Other metabolism
NC_009337.1	1210048	1209617	VanZ family protein	No match	Cell defence
NC_009337.1	1211175	1210045	glycosyltransferase	No match	Cell wall modification
NC_009337.1	1212121	1211318	glycosyltransferase	No match	Cell wall modification
NC_009337.1	1213281	1212124	O-antigen polymerase	No match	Cell wall modification
NC_009337.1	1214346	1213378	polysaccharide deacetylase family protein	No match	Other metabolism
NC_009337.1	1215623	1214355	oligosaccharide flippase family protein	No match	Cell wall modification
NC_009337.1	1217000	1215654	undecaprenyl-phosphate glucose phosphotransferase	No match	Membrane modification
NC_009337.1	1219660	1217234	polysaccharide biosynthesis tyrosine autokinase	No match	Membrane modification
NC_009337.1	1220237	1219665	hypothetical protein	No match	Hypothetical
NC_009337.1	1221105	1220758	hypothetical protein	No match	Hypothetical
NC_009337.1	1222069	1221155	hypothetical protein	No match	Hypothetical
NC_009337.1	1222355	1222152	hypothetical protein	No match	Hypothetical
NC_009337.1	1222808	1222449	hypothetical protein	No match	Hypothetical
NC_009337.1	1223766	1223461	thioredoxin	Partial match
NC_009337.1	1223957	1224430	6-pyruvoyl tetrahydrobiopterin synthase	Match
NC_009337.1	1224390	1225061	GTP cyclohydrolase I FolE	Match
NC_009337.1	1226708	1225170	NADH-quinone oxidoreductase subunit N	Match
NC_009337.1	1228384	1226747	NADH-quinone oxidoreductase subunit M	Match
NC_009337.1	1230666	1228426	NADH-quinone oxidoreductase subunit L	Match
NC_009337.1	1231037	1230720	NADH-quinone oxidoreductase subunit NuoK	Match
NC_009337.1	1231571	1231050	hypothetical protein	Match
NC_009337.1	1232218	1231586	4Fe-4S dicluster domain-containing protein	Match
NC_009337.1	1233347	1232259	NADH-quinone oxidoreductase subunit NuoH	Match
NC_009337.1	1234576	1233374	NADH-quinone oxidoreductase subunit D	Match
NC_009337.1	1235126	1234608	NADH-quinone oxidoreductase subunit C	Match
NC_009337.1	1235739	1235170	NADH-quinone oxidoreductase subunit B	Match
NC_009337.1	1236201	1235770	NADH-quinone oxidoreductase subunit A	Match
NC_009337.1	1236588	1236337	hypothetical protein	Match
NC_009337.1	1237172	1236585	tetratricopeptide repeat protein	Match
NC_009337.1	1238243	1237194	ferrochelatase	Match
NC_009337.1	1238833	1238240	hypothetical protein	Match
NC_009337.1	1238940	1239021	tRNA-Leu	Match
NC_009337.1	1239038	1239121	tRNA-Leu	Match
NC_009337.1	1239156	1239674	HIT domain-containing protein	Match
NC_009337.1	1239548	1240624	methyltransferase domain-containing protein	Match
NC_009337.1	1241987	1240629	TolC family protein	Match
NC_009337.1	1243361	1242024	replication-associated recombination protein A	Match
NC_009337.1	1244018	1243362	riboflavin synthase	Match
NC_009337.1	1244663	1244163	thiol peroxidase	Match
NC_009337.1	1245179	1244763	DoxX family protein	Match
NC_009337.1	1246306	1245206	bifunctional diaminohydroxyphosphoribosylaminopyrimidine deaminase/5-amino-6-(5-phosphoribosylamino)uracil reductase RibD	Match
NC_009337.1	1246842	1246300	dCMP deaminase family protein	Match
NC_009337.1	1246936	1248540	DUF814 domain-containing protein	Match
NC_009337.1	1248562	1248912	acyl-CoA thioesterase	Match
NC_009337.1	1250254	1248929	YjgP/YjgQ family permease	Match
NC_009337.1	1250549	1250474	tRNA-Lys	Partial match
NC_009337.1	1250897	1250559	preprotein translocase subunit SecG	Match
NC_009337.1	1251006	1251608	imidazoleglycerol-phosphate dehydratase HisB	Match
NC_009337.1	1253291	1251717	ribonuclease Y	Match
NC_009337.1	1253862	1253599	cell division protein ZapA	Match
NC_009337.1	1254176	1253871	hypothetical protein	Match
NC_009337.1	1256606	1254192	phenylalanine--tRNA ligase subunit beta	Match
NC_009337.1	1256749	1256678	tRNA-Glu	Match
NC_009337.1	1256834	1256759	tRNA-His	Match
NC_009337.1	1256939	1256864	tRNA-Arg	Match
NC_009337.1	1257036	1256964	tRNA-Pro	Match
NC_009337.1	1258434	1257124	TolC family protein	No match	Transport
NC_009337.1	1261633	1258487	efflux RND transporter permease subunit	No match	Transport
NC_009337.1	1262775	1261630	HlyD family efflux transporter periplasmic adaptor subunit	No match	Transport
NC_009337.1	1263234	1262830	NUDIX hydrolase	Partial match
NC_009337.1	1263488	1264465	NTP transferase domain-containing protein	Match
NC_009337.1	1264717	1265931	methionine adenosyltransferase	Match
NC_009337.1	1266040	1267455	adenosylhomocysteinase	Match
NC_009337.1	1267599	1267673	tRNA-Gln	Match
NC_009337.1	1267710	1268363	phosphoribosylanthranilate isomerase	Match
NC_009337.1	1269328	1268354	alpha/beta hydrolase	Match
NC_009337.1	1271193	1269442	sodium/hydrogen exchanger	Match
NC_009337.1	1271467	1273176	sulfate permease	Match
NC_009337.1	1273308	1273616	hypothetical protein	Match
NC_009337.1	1273703	1274146	DNA-binding protein	Match
NC_009337.1	1274146	1274418	hypothetical protein	Match
NC_009337.1	1275131	1274409	M48 family metallopeptidase	Match
NC_009337.1	1278394	1275128	AAA family ATPase	Match
NC_009337.1	1279479	1278397	virulence RhuM family protein	Partial match
NC_009337.1	1280707	1279469	exonuclease subunit SbcD	No match	DNA recombination and repair
NC_009337.1	1281536	1280754	hypothetical protein	No match	Hypothetical
NC_009337.1	1281797	1281597	hypothetical protein	No match	Hypothetical
NC_009337.1	1282493	1282056	arsenate reductase ArsC	No match	Other metabolism
NC_009337.1	1283925	1282759	Fic family protein	No match	Post-translation modification
NC_009337.1	1284026	1284493	hypothetical protein	No match	Hypothetical
NC_009337.1	1284828	1285880	virulence RhuM family protein	No match	General function
NC_009337.1	1286435	1286157	transposase	No match	Mobile element
NC_009337.1	1286889	1286488	transfer-messenger RNA	Partial match
NC_009337.1	1287644	1287081	YqgE/AlgH family protein	Match
NC_009337.1	1288124	1287654	thioredoxin-dependent thiol peroxidase	Match
NC_009337.1	1288227	1288724	NUDIX hydrolase	Match
NC_009337.1	1290035	1288734	mechanosensitive ion channel	Match
NC_009337.1	1291835	1290042	HAMP domain-containing protein	Match
NC_009337.1	1292535	1291825	response regulator transcription factor	Match
NC_009337.1	1293619	1292651	ABC transporter ATP-binding protein	Match
NC_009337.1	1293723	1297031	transcription-repair coupling factor	Match
NC_009337.1	1297132	1297671	(2Fe-2S)-binding protein	Match
NC_009337.1	1297764	1298447	(2Fe-2S)-binding protein	Match
NC_009337.1	1298499	1299719	alanine dehydrogenase	Match
NC_009337.1	1301254	1299683	FAD-dependent oxidoreductase	Match
NC_009337.1	1301384	1302013	sigma-70 family RNA polymerase sigma factor	Match
NC_009337.1	1302042	1302299	zf-HC2 domain-containing protein	Match
NC_009337.1	1302453	1302845	winged helix-turn-helix transcriptional regulator	Match
NC_009337.1	1303095	1303493	Hsp20/alpha crystallin family protein	No match	Stress response
NC_009337.1	1303576	1305483	molecular chaperone DnaK	Match
NC_009337.1	1305596	1306030	photosystem P840 reaction center protein PscD	Match
NC_009337.1	1306265	1307242	DUF2914 domain-containing protein	No match	Hypothetical
NC_009337.1	1308062	1307253	tol-pal system protein YbgF	Partial match
NC_009337.1	1308660	1308157	peptidoglycan-associated lipoprotein Pal	Match
NC_009337.1	1309193	1308735	peptidoglycan-associated lipoprotein Pal	Match
NC_009337.1	1310563	1309253	Tol-Pal system beta propeller repeat protein TolB	Match
NC_009337.1	1311539	1310703	TonB C-terminal domain-containing protein	Match
NC_009337.1	1311967	1311536	ExbD/TolR family protein	Match
NC_009337.1	1312647	1311985	protein TolQ	Match
NC_009337.1	1314256	1312676	DUF92 domain-containing protein	Match
NC_009337.1	1314552	1316249	dihydroxy-acid dehydratase	Match
NC_009337.1	1316263	1317984	biosynthetic-type acetolactate synthase large subunit	Match
NC_009337.1	1317995	1318471	acetolactate synthase small subunit	Match
NC_009337.1	1318518	1319510	ketol-acid reductoisomerase	Match
NC_009337.1	1319531	1320592	3-isopropylmalate dehydrogenase	Match
NC_009337.1	1320616	1322184	2-isopropylmalate synthase	Match
NC_009337.1	1322192	1323487	3-isopropylmalate dehydratase large subunit	Match
NC_009337.1	1323518	1324084	3-isopropylmalate dehydratase small subunit	Match
NC_009337.1	1324108	1325697	citramalate synthase	Match
NC_009337.1	1325895	1326566	DNA repair protein RadC	Match
NC_009337.1	1326852	1326595	cold shock domain-containing protein	Match
NC_009337.1	1327069	1327800	SDR family oxidoreductase	Match
NC_009337.1	1327904	1328362	GatB/YqeY domain-containing protein	Match
NC_009337.1	1328382	1329674	serine--tRNA ligase	Match
NC_009337.1	1330722	1329658	homoserine O-acetyltransferase	Match
NC_009337.1	1332020	1330719	O-acetylhomoserine aminocarboxypropyltransferase/cysteine synthase	Match
NC_009337.1	1332223	1332114	SAM riboswitch class I	Match
NC_009337.1	1332330	1333667	16S rRNA (cytosine(967)-C(5))-methyltransferase	Match
NC_009337.1	1333676	1334590	site-specific tyrosine recombinase XerD	Match
NC_009337.1	1335068	1334613	DUF2721 domain-containing protein	Match
NC_009337.1	1336495	1335101	MBL fold metallo-hydrolase	Match
NC_009337.1	1338328	1336532	DEAD/DEAH box helicase	Match
NC_009337.1	1338670	1339992	3-deoxy-D-manno-octulosonic acid transferase	Partial match
NC_009337.1	1341194	1339953	LuxR family transcriptional regulator	Partial match
NC_009337.1	1341394	1341849	transcriptional repressor	Match
NC_009337.1	1342435	1341935	rubrerythrin family protein	Match
NC_009337.1	1342993	1342499	ferritin	Partial match
NC_009337.1	1343792	1343118	peroxiredoxin	Match
NC_009337.1	1344039	1344503	DUF4293 family protein	Match
NC_009337.1	1344506	1345522	4-hydroxythreonine-4-phosphate dehydrogenase PdxA	Match
NC_009337.1	1345519	1346220	ATP-binding cassette domain-containing protein	Match
NC_009337.1	1349666	1346217	vitamin B12-dependent ribonucleotide reductase	Match
NC_009337.1	1350545	1349820	hypothetical protein	No match	Hypothetical
NC_009337.1	1351561	1350611	quinolinate synthase NadA	Partial match
NC_009337.1	1351953	1351564	co-chaperone GroES	Match
NC_009337.1	1352038	1352880	rod shape-determining protein MreC	Match
NC_009337.1	1352904	1353395	hypothetical protein	Match
NC_009337.1	1353404	1355308	penicillin-binding protein 2	Match
NC_009337.1	1355298	1356785	FAD-binding oxidoreductase	Match
NC_009337.1	1356794	1357267	SsrA-binding protein	Match
NC_009337.1	1357290	1358507	tyrosine--tRNA ligase	Match
NC_009337.1	1358627	1359172	arginine decarboxylase, pyruvoyl-dependent	Match
NC_009337.1	1359379	1360974	L-aspartate oxidase	Match
NC_009337.1	1361809	1360976	NAD+ synthase	Match
NC_009337.1	1362367	1361825	hypothetical protein	Match
NC_009337.1	1363758	1362385	peptidoglycan DD-metalloendopeptidase family protein	Match
NC_009337.1	1363898	1365172	UDP-N-acetylglucosamine 1-carboxyvinyltransferase	Match
NC_009337.1	1365260	1365333	tRNA-Ile	Match
NC_009337.1	1365370	1365443	tRNA-Glu	Match
NC_009337.1	1365491	1365564	tRNA-Arg	Match
NC_009337.1	1365578	1365649	tRNA-Gln	Match
NC_009337.1	1366361	1366005	transposase	No match	Mobile element
NC_009337.1	1366450	1367448	hypothetical protein	No match	Hypothetical
NC_009337.1	1367664	1368134	ATP-binding protein	Partial match
NC_009337.1	1368224	1369504	hypothetical protein	Match
NC_009337.1	1370499	1369483	NAD-dependent epimerase	Match
NC_009337.1	1370696	1372144	circularly permuted type 2 ATP-grasp protein	Match
NC_009337.1	1372171	1373283	alpha-E domain-containing protein	Match
NC_009337.1	1373280	1374098	transglutaminase family protein	Match
NC_009337.1	1374248	1375375	tRNA guanosine(34) transglycosylase Tgt	Match
NC_009337.1	1375368	1376672	30S ribosomal protein S12 methylthiotransferase RimO	Match
NC_009337.1	1376778	1377371	shikimate kinase	Match
NC_009337.1	1377368	1378465	3-dehydroquinate synthase	Match
NC_009337.1	1379252	1378443	type III pantothenate kinase	Match
NC_009337.1	1379760	1379245	hypothetical protein	Match
NC_009337.1	1380735	1379863	alpha/beta hydrolase	Partial match
NC_009337.1	1383075	1380907	glutamine synthetase	Match
NC_009337.1	1383670	1383146	Lrp/AsnC family transcriptional regulator	Match
NC_009337.1	1383888	1384130	hypothetical protein	Match
NC_009337.1	1384225	1385586	NAD(P)-binding protein	Partial match
NC_009337.1	1385726	1386370	chlorosome envelope protein H	Match
NC_009337.1	1386571	1387983	response regulator	No match	Cell signaling
NC_009337.1	1388454	1388008	dUTP diphosphatase	Match
NC_009337.1	1388531	1389283	bacillithiol biosynthesis deacetylase BshB1	Match
NC_009337.1	1389280	1390971	ABC transporter substrate-binding protein	Match
NC_009337.1	1391048	1391521	2-vinyl bacteriochlorophyllide hydratase	Match
NC_009337.1	1391518	1392522	chlorophyll synthesis pathway protein BchC	Match
NC_009337.1	1392534	1393637	chlorophyllide a reductase iron protein subunit X	Match
NC_009337.1	1395581	1393755	translational GTPase TypA	Match
NC_009337.1	1395780	1396625	cytochrome c biogenesis protein CcsA	Match
NC_009337.1	1396728	1398005	glutamyl-tRNA reductase	Match
NC_009337.1	1398025	1398966	hydroxymethylbilane synthase	Match
NC_009337.1	1398966	1399706	uroporphyrinogen-III synthase	Match
NC_009337.1	1400474	1399707	histidinol-phosphatase	Match
NC_009337.1	1400729	1402270	acyl-CoA carboxylase subunit beta	Match
NC_009337.1	1402294	1402632	OadG family protein	Match
NC_009337.1	1402629	1403048	acetyl-CoA carboxylase biotin carboxyl carrier protein subunit	Match
NC_009337.1	1403057	1404193	sodium ion-translocating decarboxylase subunit beta	Match
NC_009337.1	1404329	1405315	porphobilinogen synthase	Match
NC_009337.1	1405422	1406615	chorismate synthase	Match
NC_009337.1	1407421	1406579	serine O-acetyltransferase	Match
NC_009337.1	1407683	1408300	M15 family metallopeptidase	No match	Other metabolism
NC_009337.1	1408403	1408828	6-carboxytetrahydropterin synthase	No match	Other metabolism
NC_009337.1	1409129	1411432	putative monovalent cation/H+ antiporter subunit A	Partial match
NC_009337.1	1411429	1411848	Na+/H+ antiporter subunit B	Match
NC_009337.1	1411845	1412210	Na+/H+ antiporter subunit C	Match
NC_009337.1	1412207	1413727	Na+/H+ antiporter subunit D	Match
NC_009337.1	1413724	1414197	Na+/H+ antiporter subunit E	Match
NC_009337.1	1414194	1414466	cation:proton antiporter	Match
NC_009337.1	1414463	1414819	monovalent cation/H(+) antiporter subunit G	Match
NC_009337.1	1415730	1414840	polyketide biosynthesis O-methyltransferase	Match
NC_009337.1	1416857	1415778	SO_0444 family Cu/Zn efflux transporter	Partial match
NC_009337.1	1417270	1416854	helix-turn-helix transcriptional regulator	Match
NC_009337.1	1417567	1417866	DUF4282 domain-containing protein	Match
NC_009337.1	1419851	1418208	carbon starvation protein A	Partial match
NC_009337.1	1420021	1420239	hypothetical protein	Match
NC_009337.1	1421198	1420260	radical SAM protein	Match
NC_009337.1	1422578	1421229	BCD family MFS transporter	Match
NC_009337.1	1424851	1422662	ATP-dependent RecD-like DNA helicase	Partial match
NC_009337.1	1424943	1425038	TPP riboswitch	Match
NC_009337.1	1425121	1426836	phosphomethylpyrimidine synthase ThiC	Partial match
NC_009337.1	1426873	1428396	sodium-dependent transporter	No match	Transport
NC_009337.1	1429236	1428484	triose-phosphate isomerase	Match
NC_009337.1	1429472	1429248	hypothetical protein	Match
NC_009337.1	1429979	1429500	transcription elongation factor GreA	Match
NC_009337.1	1431681	1430149	DegQ family serine endoprotease	Partial match
NC_009337.1	1433221	1431731	anthranilate synthase component I	Match
NC_009337.1	1433342	1433761	hypothetical protein	Match
NC_009337.1	1434627	1433755	signal peptidase I	Match
NC_009337.1	1436468	1434651	elongation factor 4	Match
NC_009337.1	1437976	1436552	glycosyltransferase family 2 protein	No match	Cell wall modification
NC_009337.1	1439034	1437973	HEAT repeat domain-containing protein	No match	Other metabolism
NC_009337.1	1440070	1439027	NAD-dependent epimerase/dehydratase family protein	No match	General function
NC_009337.1	1440957	1440298	YaiO family outer membrane beta-barrel protein	No match	Membrane protein
NC_009337.1	1441133	1442149	HD-GYP domain-containing protein	No match	General function
NC_009337.1	1443128	1442169	methionyl-tRNA formyltransferase	Partial match
NC_009337.1	1443691	1443119	peptide deformylase	Match
NC_009337.1	1443917	1444420	transcriptional repressor	Match
NC_009337.1	1446598	1444427	cation:proton antiporter	Match
NC_009337.1	1446800	1447126	multidrug efflux SMR transporter	Match
NC_009337.1	1447134	1448222	glutamate 5-kinase	Match
NC_009337.1	1448244	1448582	alkylphosphonate utilization protein	Match
NC_009337.1	1448607	1449875	glutamate-5-semialdehyde dehydrogenase	Match
NC_009337.1	1449872	1450579	ABC transporter ATP-binding protein	Match
NC_009337.1	1450592	1451920	MFS transporter	Partial match
NC_009337.1	1453159	1452047	DegT/DnrJ/EryC1/StrS family aminotransferase	Match
NC_009337.1	1453671	1453898	CRISPR-associated endonuclease Cas3''	No match	Cell defence
NC_009337.1	1453899	1455896	CRISPR-associated helicase Cas3'	No match	Cell defence
NC_009337.1	1455919	1456629	type I-C CRISPR-associated protein Cas5	No match	Cell defence
NC_009337.1	1456626	1458341	type I-C CRISPR-associated protein Cas8c/Csd1	No match	Cell defence
NC_009337.1	1458368	1459216	type I-C CRISPR-associated protein Cas7/Csd2	No match	Cell defence
NC_009337.1	1459209	1459868	CRISPR-associated protein Cas4	No match	Cell defence
NC_009337.1	1459865	1460896	type I-C CRISPR-associated endonuclease Cas1	No match	Cell defence
NC_009337.1	1460900	1461190	CRISPR-associated endonuclease Cas2	No match	Cell defence
NC_009337.1	1461368	1461601	CRISPR repeat	No match	Cell defence
NC_009337.1	1461705	1462858	IS3 family transposase	Match
NC_009337.1	1462908	1463724	CRISPR repeat	No match	Cell defence
NC_009337.1	1463994	1465424	UDP-N-acetylmuramate--alanine ligase	Match
NC_009337.1	1465551	1466555	type I glyceraldehyde-3-phosphate dehydrogenase	Match
NC_009337.1	1466724	1467194	hypothetical protein	Match
NC_009337.1	1468455	1467265	molecular chaperone DnaJ	Partial match
NC_009337.1	1469063	1468479	nucleotide exchange factor GrpE	Match
NC_009337.1	1470155	1469082	heat-inducible transcription repressor HrcA	Match
NC_009337.1	1471169	1470291	peptide chain release factor N(5)-glutamine methyltransferase	Match
NC_009337.1	1471378	1472118	DUF4412 domain-containing protein	Match
NC_009337.1	1472170	1473615	proline--tRNA ligase	Match
NC_009337.1	1474263	1473673	peroxiredoxin	Match
NC_009337.1	1474407	1475708	NCS2 family permease	Match
NC_009337.1	1475728	1476588	apolipoprotein N-acyltransferase	Match
NC_009337.1	1477469	1476594	4-(cytidine 5'-diphospho)-2-C-methyl-D-erythritol kinase	Match
NC_009337.1	1477527	1478336	SPOR domain-containing protein	Match
NC_009337.1	1478333	1479466	sigma-54-dependent Fis family transcriptional regulator	Match
NC_009337.1	1481070	1479454	apolipoprotein N-acyltransferase	Match
NC_009337.1	1481249	1482349	bacteriochlorophyll a protein	Match
NC_009337.1	1482820	1482419	MerR family transcriptional regulator	Match
NC_009337.1	1482902	1484659	ABC transporter ATP-binding protein	Match
NC_009337.1	1487313	1484689	DNA mismatch repair protein MutS	Match
NC_009337.1	1487568	1487858	50S ribosomal protein L21	Match
NC_009337.1	1487902	1488156	50S ribosomal protein L27	Match
NC_009337.1	1488303	1489232	malate dehydrogenase	Match
NC_009337.1	1490570	1489500	agmatine deiminase family protein	Match
NC_009337.1	1491846	1490596	M48 family metallopeptidase	Match
NC_009337.1	1492745	1491873	carbon-nitrogen hydrolase	Match
NC_009337.1	1493634	1492765	1,4-dihydroxy-2-naphthoate polyprenyltransferase	Match
NC_009337.1	1494688	1493627	NAD(P)/FAD-dependent oxidoreductase	Match
NC_009337.1	1495031	1494708	hypothetical protein	Match
NC_009337.1	1495175	1495930	imidazole glycerol phosphate synthase subunit HisF	Partial match
NC_009337.1	1495973	1496443	YqhA family protein	No match	General function
NC_009337.1	1497581	1496454	magnesium/cobalt transporter CorA	No match	Transport
NC_009337.1	1497828	1498982	homocitrate synthase	Match
NC_009337.1	1499007	1500608	sigma-54-dependent Fis family transcriptional regulator	Match
NC_009337.1	1501104	1501928	nitrogenase iron protein	Match
NC_009337.1	1501949	1502305	P-II family nitrogen regulator	Match
NC_009337.1	1502306	1502683	P-II family nitrogen regulator	Match
NC_009337.1	1502723	1504363	nitrogenase molybdenum-iron protein alpha chain	Match
NC_009337.1	1504390	1505769	nitrogenase molybdenum-iron protein subunit beta	Match
NC_009337.1	1505868	1507229	nitrogenase iron-molybdenum cofactor biosynthesis protein NifE	Match
NC_009337.1	1507226	1508578	nitrogenase	Match
NC_009337.1	1508593	1509855	nitrogenase cofactor biosynthesis protein NifB	Match
NC_009337.1	1509921	1510229	(2Fe-2S) ferredoxin domain-containing protein	Match
NC_009337.1	1510390	1510788	c-type cytochrome	No match	Other metabolism
NC_009337.1	1510859	1513060	outer membrane beta-barrel protein	Partial match
NC_009337.1	1513248	1514060	TOBE domain-containing protein	Match
NC_009337.1	1514196	1515206	GTP 3',8-cyclase MoaA	Match
NC_009337.1	1515646	1515209	MOSC domain-containing protein	Match
NC_009337.1	1515809	1515964	hypothetical protein	Partial match
NC_009337.1	1516021	1517166	aminotransferase class I/II-fold pyridoxal phosphate-dependent enzyme	Match
NC_009337.1	1517205	1517408	sulfur carrier protein ThiS	Match
NC_009337.1	1517436	1518215	thiazole synthase	Match
NC_009337.1	1518212	1519282	2-iminoacetate synthase ThiH	Match
NC_009337.1	1519273	1520049	HesA/MoeB/ThiF family protein	Match
NC_009337.1	1520046	1521281	hypothetical protein	Match
NC_009337.1	1521278	1522075	cytochrome c biogenesis protein CcsA	Match
NC_009337.1	1522915	1522082	putative beta-lysine N-acetyltransferase	Match
NC_009337.1	1524351	1522912	sodium:solute symporter family protein	Match
NC_009337.1	1525673	1524348	lysine 2,3-aminomutase	Match
NC_009337.1	1526165	1525683	MarR family transcriptional regulator	Match
NC_009337.1	1527450	1526314	Gfo/Idh/MocA family oxidoreductase	Match
NC_009337.1	1528929	1527511	oxygen-independent coproporphyrinogen III oxidase	Match
NC_009337.1	1529061	1529588	5-(carboxyamino)imidazole ribonucleotide mutase	Match
NC_009337.1	1529575	1530078	cupin domain-containing protein	Match
NC_009337.1	1530159	1531475	NAD(P)/FAD-dependent oxidoreductase	Match
NC_009337.1	1531472	1531684	hypothetical protein	Match
NC_009337.1	1531716	1532921	aspartate aminotransferase family protein	Match
NC_009337.1	1532944	1533135	hypothetical protein	Match
NC_009337.1	1533910	1533122	energy transducer TonB	Match
NC_009337.1	1534462	1533938	biopolymer transporter ExbD	Match
NC_009337.1	1534997	1534464	biopolymer transporter ExbD	Match
NC_009337.1	1535749	1535003	MotA/TolQ/ExbB proton channel family protein	Match
NC_009337.1	1535961	1537862	DNA primase	Match
NC_009337.1	1539305	1537980	serine hydroxymethyltransferase	Match
NC_009337.1	1540633	1539401	bifunctional 3,4-dihydroxy-2-butanone-4-phosphate synthase/GTP cyclohydrolase II	Match
NC_009337.1	1540859	1542718	carbamoyl-phosphate synthase large subunit	Partial match
NC_009337.1	1542734	1543201	hypothetical protein	Match
NC_009337.1	1544075	1543209	metallophosphoesterase	Match
NC_009337.1	1544255	1546375	alpha-glucan family phosphorylase	Match
NC_009337.1	1546474	1547406	dihydroorotate dehydrogenase	Partial match
NC_009337.1	1547672	1548145	2-C-methyl-D-erythritol 2,4-cyclodiphosphate synthase	Match
NC_009337.1	1549421	1548153	ABC transporter permease	Match
NC_009337.1	1549576	1550781	6-phosphofructokinase	Match
NC_009337.1	1550930	1551841	branched-chain amino acid transaminase	Match
NC_009337.1	1551862	1553037	DNA polymerase III subunit delta'	Partial match
NC_009337.1	1554193	1553108	M24 family metallopeptidase	Match
NC_009337.1	1554322	1555377	anthranilate phosphoribosyltransferase	Match
NC_009337.1	1555471	1556463	chlorophyll synthase ChlG	Match
NC_009337.1	1556538	1556756	50S ribosomal protein L28	Match
NC_009337.1	1556840	1557280	ribonuclease HI	Match
NC_009337.1	1557299	1558330	hypothetical protein	Match
NC_009337.1	1559294	1558305	tRNA lysidine(34) synthetase TilS	Match
NC_009337.1	1559495	1560154	phosphatidylserine decarboxylase	Match
NC_009337.1	1560249	1560458	twin-arginine translocase TatA/TatE family subunit	Match
NC_009337.1	1560535	1562256	DNA repair protein RecN	Match
NC_009337.1	1562324	1563214	4-hydroxy-tetrahydrodipicolinate synthase	Match
NC_009337.1	1564542	1563211	aminomethyl-transferring glycine dehydrogenase subunit GcvPA	Match
NC_009337.1	1564932	1564549	glycine cleavage system protein GcvH	Match
NC_009337.1	1565831	1565082	23S rRNA (guanosine(2251)-2'-O)-methyltransferase RlmB	Match
NC_009337.1	1566092	1569640	pyruvate:ferredoxin (flavodoxin) oxidoreductase	Match
NC_009337.1	1571482	1569716	tetratricopeptide repeat protein	Partial match
NC_009337.1	1572464	1571424	Holliday junction branch migration DNA helicase RuvB	Match
NC_009337.1	1573443	1572478	ABC transporter permease	Match
NC_009337.1	1575240	1573450	ABC transporter substrate-binding protein	Match
NC_009337.1	1576204	1575206	HPr kinase/phosphorylase	Match
NC_009337.1	1576576	1576256	ribosome-associated translation inhibitor RaiA	Match
NC_009337.1	1577629	1576652	tyrosine recombinase XerC	Match
NC_009337.1	1578438	1577626	DUF4905 domain-containing protein	Match
NC_009337.1	1579130	1578435	methyltransferase domain-containing protein	Match
NC_009337.1	1579283	1579633	NADPH-dependent 7-cyano-7-deazaguanine reductase QueF	Match
NC_009337.1	1580366	1579725	photosystem P840 reaction-center cytochrome c-551	Match
NC_009337.1	1580567	1582114	YifB family Mg chelatase-like AAA ATPase	Match
NC_009337.1	1583964	1582150	signal peptide peptidase SppA	Match
NC_009337.1	1584974	1583961	ATP-binding cassette domain-containing protein	Match
NC_009337.1	1585229	1585927	16S rRNA (cytidine(1402)-2'-O)-methyltransferase	Match
NC_009337.1	1585911	1586789	pantoate--beta-alanine ligase	Match
NC_009337.1	1586897	1589095	polyribonucleotide nucleotidyltransferase	Match
NC_009337.1	1589208	1591625	leucine--tRNA ligase	Match
NC_009337.1	1591794	1593770	acetate--CoA ligase	Match
NC_009337.1	1594323	1593841	tryptophan-rich sensory protein	Match
NC_009337.1	1594513	1595340	inositol monophosphatase	Match
NC_009337.1	1595451	1596857	bifunctional UDP-3-O-[3-hydroxymyristoyl] N-acetylglucosamine deacetylase/3-hydroxyacyl-ACP dehydratase	Match
NC_009337.1	1597408	1596854	CDP-alcohol phosphatidyltransferase	Match
NC_009337.1	1597995	1597426	crossover junction endodeoxyribonuclease RuvC	Match
NC_009337.1	1598751	1597999	YebC/PmpR family DNA-binding transcriptional regulator	Match
NC_009337.1	1598870	1599712	prephenate dehydratase	Match
NC_009337.1	1599709	1602531	DNA polymerase I	Match
NC_009337.1	1602728	1603339	peptidoglycan DD-metalloendopeptidase family protein	Match
NC_009337.1	1603364	1603591	DUF2795 domain-containing protein	Match
NC_009337.1	1603646	1605826	BamA/TamA family outer membrane protein	Match
NC_009337.1	1605849	1606514	ribulose-phosphate 3-epimerase	Match
NC_009337.1	1607319	1606543	indole-3-glycerol phosphate synthase TrpC	Match
NC_009337.1	1608808	1607330	carbamoyl-phosphate synthase large subunit	Match
NC_009337.1	1609301	1608870	M67 family metallopeptidase	Match
NC_009337.1	1610649	1609366	phosphoribosylamine--glycine ligase	Match
NC_009337.1	1610816	1611433	DUF374 domain-containing protein	Match
NC_009337.1	1611426	1612487	tetraacyldisaccharide 4'-kinase	Match
NC_009337.1	1613052	1612507	hydrolase	Match
NC_009337.1	1613165	1613671	isoprenylcysteine carboxylmethyltransferase family protein	Match
NC_009337.1	1613714	1614370	isoprenoid biosynthesis glyoxalase ElbB	Match
NC_009337.1	1615267	1614362	ABC transporter permease	Match
NC_009337.1	1615402	1618230	excinuclease ABC subunit UvrA	Match
NC_009337.1	1618311	1619006	DUF1003 domain-containing protein	Match
NC_009337.1	1619598	1619089	UpxY family transcription antiterminator	Partial match
NC_009337.1	1620525	1619785	YdcF family protein	No match	General function
NC_009337.1	1622366	1620519	DNA helicase RecQ	Partial match
NC_009337.1	1624313	1622454	radical SAM protein	Partial match
NC_009337.1	1626159	1624537	hydroxylamine reductase	Match
NC_009337.1	1626598	1626179	hypothetical protein	Match
NC_009337.1	1627101	1626655	Rrf2 family transcriptional regulator	Partial match
NC_009337.1	1627315	1628241	class I SAM-dependent methyltransferase	Match
NC_009337.1	1628291	1628731	heme-binding domain-containing protein	Match
NC_009337.1	1628749	1629777	site-2 protease family protein	Match
NC_009337.1	1629794	1630744	dihydropteroate synthase	Partial match
NC_009337.1	1630825	1634361	chromosome segregation protein SMC	Match
NC_009337.1	1634382	1635083	HAD hydrolase-like protein	Match
NC_009337.1	1635095	1635589	transcription antitermination factor NusB	Match
NC_009337.1	1635617	1636318	serine/threonine protein phosphatase	Match
NC_009337.1	1636315	1636959	endonuclease III	Partial match
NC_009337.1	1637515	1637057	hypothetical protein	Match
NC_009337.1	1639500	1637611	aminodeoxychorismate synthase component I	Match
NC_009337.1	1641016	1639463	Ppx/GppA family phosphatase	Match
NC_009337.1	1641186	1641842	phosphatidate cytidylyltransferase	Match
NC_009337.1	1641857	1642807	threonylcarbamoyl-AMP synthase	Match
NC_009337.1	1644889	1642841	hypothetical protein	Match
NC_009337.1	1645669	1644926	rRNA pseudouridine synthase	Match
NC_009337.1	1646273	1645647	SMC-Scp complex subunit ScpB	Match
NC_009337.1	1647109	1646339	1-(5-phosphoribosyl)-5-[(5-phosphoribosylamino)methylideneamino]imidazole-4-carboxamide isomerase	Match
NC_009337.1	1647759	1647154	imidazole glycerol phosphate synthase subunit HisH	Match
NC_009337.1	1647930	1648775	sulfide/dihydroorotate dehydrogenase-like FAD/NAD-binding protein	Match
NC_009337.1	1648918	1650336	NADPH-dependent glutamate synthase	Match
NC_009337.1	1651256	1650351	transporter	Match
NC_009337.1	1652356	1651253	efflux RND transporter periplasmic adaptor subunit	Match
NC_009337.1	1652525	1652938	phosphoribosyl-AMP cyclohydrolase	Match
NC_009337.1	1652922	1653668	bifunctional demethylmenaquinone methyltransferase/2-methoxy-6-polyprenyl-1,4-benzoquinol methylase UbiE	Match
NC_009337.1	1655805	1653781	NAD-dependent DNA ligase LigA	Match
NC_009337.1	1657357	1655807	hypothetical protein	Match
NC_009337.1	1658084	1657371	ABC transporter ATP-binding protein	Match
NC_009337.1	1659274	1658216	ACR3 family arsenite efflux transporter	No match	Transport
NC_009337.1	1659705	1659271	arsenate reductase ArsC	Partial match
NC_009337.1	1660777	1659746	permease	Match
NC_009337.1	1661077	1660784	thioredoxin family protein	Match
NC_009337.1	1661462	1661127	winged helix-turn-helix transcriptional regulator	Match
NC_009337.1	1661706	1662557	ModD protein	Match
NC_009337.1	1662575	1663348	molybdate ABC transporter substrate-binding protein	Match
NC_009337.1	1663348	1664034	molybdate ABC transporter permease subunit	Match
NC_009337.1	1664031	1665086	molybdenum ABC transporter ATP-binding protein	Match
NC_009337.1	1665217	1665924	SDR family oxidoreductase	Match
NC_009337.1	1666020	1666298	hypothetical protein	Match
NC_009337.1	1666302	1666700	phage holin family protein	Match
NC_009337.1	1666726	1667115	hypothetical protein	Match
NC_009337.1	1667277	1670759	alpha-amylase	Partial match
NC_009337.1	1672201	1670936	cytochrome b	Match
NC_009337.1	1672781	1672236	Rieske 2Fe-2S domain-containing protein	Match
NC_009337.1	1674061	1672934	carotenoid 1,2-hydratase	Match
NC_009337.1	1674367	1674295	tRNA-Phe	Match
NC_009337.1	1675971	1674460	glutamate--tRNA ligase	Match
NC_009337.1	1676224	1678209	ATP-dependent metallopeptidase FtsH/Yme1/Tma family protein	Match
NC_009337.1	1678224	1678604	sulfite exporter TauE/SafE family protein	Match
NC_009337.1	1678643	1678951	integration host factor subunit beta	Match
NC_009337.1	1679349	1678963	hypothetical protein	Match
NC_009337.1	1680840	1679383	citrate transporter	Match
NC_009337.1	1681392	1680859	adenine phosphoribosyltransferase	Match
NC_009337.1	1682798	1681443	MiaB/RimO family radical SAM methylthiotransferase	Match
NC_009337.1	1682949	1683401	hypothetical protein	Match
NC_009337.1	1684679	1683456	rod shape-determining protein RodA	Match
NC_009337.1	1684781	1685707	GTPase Era	Match
NC_009337.1	1687590	1685875	30S ribosomal protein S1	Match
NC_009337.1	1688496	1687783	(d)CMP kinase	Match
NC_009337.1	1688651	1689742	redox-regulated ATPase YchF	Match
NC_009337.1	1689774	1690589	glutamate racemase	Match
NC_009337.1	1690675	1691616	4-hydroxy-3-methylbut-2-enyl diphosphate reductase	Match
NC_009337.1	1691869	1691621	hypothetical protein	Match
NC_009337.1	1693053	1691872	lipid-A-disaccharide synthase	Match
NC_009337.1	1693164	1694546	phosphoglucomutase/phosphomannomutase family protein	Match
NC_009337.1	1694723	1695265	RNA polymerase sigma factor	Match
NC_009337.1	1695340	1695720	hypothetical protein	Match
NC_009337.1	1695774	1696289	periplasmic heavy metal sensor	Match
NC_009337.1	1696309	1697187	DUF4405 domain-containing protein	Match
NC_009337.1	1698758	1697277	oligosaccharide flippase family protein	Match
NC_009337.1	1699130	1698792	hypothetical protein	Match
NC_009337.1	1699246	1700214	KpsF/GutQ family sugar-phosphate isomerase	Match
NC_009337.1	1701172	1700270	succinate--CoA ligase subunit alpha	Match
NC_009337.1	1702643	1701195	Asp-tRNA(Asn)/Glu-tRNA(Gln) amidotransferase subunit GatA	Match
NC_009337.1	1702867	1703712	isoprenyl transferase	Match
NC_009337.1	1703734	1706208	outer membrane protein assembly factor BamA	Match
NC_009337.1	1706427	1706996	porin family protein	Match
NC_009337.1	1707689	1707078	bifunctional nuclease family protein	Match
NC_009337.1	1708740	1707739	electron transfer flavoprotein subunit alpha/FixB family protein	Match
NC_009337.1	1709483	1708737	electron transfer flavoprotein subunit beta/FixA family protein	Match
NC_009337.1	1709637	1709556	tRNA-Leu	Match
NC_009337.1	1709746	1709674	tRNA-Lys	Match
NC_009337.1	1711278	1709989	transcription termination factor Rho	Match
NC_009337.1	1712829	1711555	bifunctional folylpolyglutamate synthase/dihydrofolate synthase	Match
NC_009337.1	1713443	1712841	Holliday junction branch migration protein RuvA	Match
NC_009337.1	1713746	1713471	30S ribosomal protein S20	Match
NC_009337.1	1713894	1715318	phosphoglucosamine mutase	Match
NC_009337.1	1715328	1717130	ABC transporter ATP-binding protein	Partial match
NC_009337.1	1717180	1717405	Txe/YoeB family addiction module toxin	No match	Cell defence
NC_009337.1	1718707	1717439	ABC transporter permease	Match
NC_009337.1	1718820	1719887	type 2 isopentenyl-diphosphate Delta-isomerase	Match
NC_009337.1	1719899	1720891	polyprenyl synthetase family protein	Match
NC_009337.1	1720900	1722039	DNA-protecting protein DprA	Match
NC_009337.1	1723073	1722018	glycosyltransferase family 9 protein	Match
NC_009337.1	1723256	1723807	OmpH family outer membrane protein	Match
NC_009337.1	1723845	1724432	LPS export ABC transporter periplasmic protein LptC	Match
NC_009337.1	1724455	1724841	aspartate 1-decarboxylase	Match
NC_009337.1	1724867	1725598	NTP transferase domain-containing protein	Partial match
NC_009337.1	1726189	1725716	VOC family protein	Match
NC_009337.1	1726523	1726170	hypothetical protein	Match
NC_009337.1	1727120	1726536	guanylate kinase	Match
NC_009337.1	1728015	1727128	YicC family protein	Match
NC_009337.1	1728371	1728102	30S ribosomal protein S15	Match
NC_009337.1	1729355	1728429	bifunctional riboflavin kinase/FAD synthetase	Match
NC_009337.1	1730106	1729384	tRNA pseudouridine(55) synthase TruB	Match
NC_009337.1	1730489	1730130	30S ribosome-binding factor RbfA	Match
NC_009337.1	1733207	1730505	translation initiation factor IF-2	Match
NC_009337.1	1734932	1733376	transcription termination/antitermination protein NusA	Match
NC_009337.1	1735489	1734971	ribosome maturation factor RimP	Match
NC_009337.1	1735863	1735645	hypothetical protein	Match
NC_009337.1	1736104	1736592	D-glycero-beta-D-manno-heptose 1-phosphate adenylyltransferase	Match
NC_009337.1	1736579	1741102	translocation/assembly module TamB	Match
NC_009337.1	1741675	1742658	hypothetical protein	Partial match
NC_009337.1	1743036	1744274	bifunctional phosphopantothenoylcysteine decarboxylase/phosphopantothenate--cysteine ligase CoaBC	Match
NC_009337.1	1744271	1744846	uracil-DNA glycosylase	Match
NC_009337.1	1744843	1746366	replicative DNA helicase	Match
NC_009337.1	1746425	1748182	phosphoenolpyruvate--protein phosphotransferase	Match
NC_009337.1	1750368	1748254	peptidyl-prolyl cis-trans isomerase	Match
NC_009337.1	1751079	1750390	protein-L-isoaspartate(D-aspartate) O-methyltransferase	Match
NC_009337.1	1751151	1751759	DUF123 domain-containing protein	Match
NC_009337.1	1752692	1751739	signal recognition particle-docking protein FtsY	Match
NC_009337.1	1752779	1753843	thiamine-phosphate kinase	Match
NC_009337.1	1753991	1754079	tRNA-Leu	Match
NC_009337.1	1754159	1755526	TrpB-like pyridoxal phosphate-dependent enzyme	Match
NC_009337.1	1755803	1755624	DUF2934 domain-containing protein	No match	Hypothetical
NC_009337.1	1756268	1755936	hypothetical protein	Match
NC_009337.1	1758935	1756380	ATP-dependent Clp protease ATP-binding subunit	Match
NC_009337.1	1759191	1759658	hypothetical protein	Match
NC_009337.1	1760482	1759655	epimerase	Partial match
NC_009337.1	1760594	1761433	MBL fold metallo-hydrolase	Match
NC_009337.1	1762095	1761430	cyclase	Partial match
NC_009337.1	1762410	1762201	cysteine-rich CWC family protein	No match	General function
NC_009337.1	1762517	1762444	tRNA-Pro	Match
NC_009337.1	1763484	1762822	DedA family protein	Match
NC_009337.1	1763593	1764480	alpha/beta hydrolase	Match
NC_009337.1	1764583	1766808	PBP1A family penicillin-binding protein	Match
NC_009337.1	1766844	1768385	glutamine-hydrolyzing GMP synthase	Partial match
NC_009337.1	1768391	1769182	sulfite exporter TauE/SafE family protein	No match	Transport
NC_009337.1	1769219	1770436	phosphoserine phosphatase SerB	Partial match
NC_009337.1	1770691	1770428	ferredoxin family protein	Match
NC_009337.1	1771293	1770997	ferredoxin family protein	Match
NC_009337.1	1772803	1771409	FAD-dependent oxidoreductase	Match
NC_009337.1	1775511	1772854	alanine--tRNA ligase	Match
NC_009337.1	1775775	1776056	hypothetical protein	Match
NC_009337.1	1776253	1778136	2-oxoacid:acceptor oxidoreductase subunit alpha	Match
NC_009337.1	1778140	1779168	2-oxoacid:ferredoxin oxidoreductase subunit beta	Match
NC_009337.1	1780273	1779266	acetyl-CoA carboxylase carboxyltransferase subunit alpha	Match
NC_009337.1	1780689	1780414	HU family DNA-binding protein	Match
NC_009337.1	1780873	1781439	elongation factor P	Match
NC_009337.1	1781492	1781950	acetyl-CoA carboxylase biotin carboxyl carrier protein	Match
NC_009337.1	1781972	1783312	acetyl-CoA carboxylase biotin carboxylase subunit	Match
NC_009337.1	1788029	1783575	DNA-directed RNA polymerase subunit beta'	Partial match
NC_009337.1	1792015	1788104	DNA-directed RNA polymerase subunit beta	Match
NC_009337.1	1792592	1792221	50S ribosomal protein L7/L12	Match
NC_009337.1	1793177	1792659	50S ribosomal protein L10	Match
NC_009337.1	1793887	1793198	50S ribosomal protein L1	Match
NC_009337.1	1794404	1793979	50S ribosomal protein L11	Match
NC_009337.1	1795027	1794452	transcription termination/antitermination factor NusG	Match
NC_009337.1	1795238	1795047	preprotein translocase subunit SecE	Match
NC_009337.1	1795356	1795284	tRNA-Trp	Match
NC_009337.1	1795457	1795385	tRNA-Thr	Match
NC_009337.1	1795564	1795482	tRNA-Tyr	Match
NC_009337.1	1795650	1795578	tRNA-Thr	Match
NC_009337.1	1796494	1795721	SDR family oxidoreductase	Match
NC_009337.1	1798561	1796501	(E)-4-hydroxy-3-methylbut-2-enyl-diphosphate synthase	Match
NC_009337.1	1798913	1798608	hypothetical protein	Match
NC_009337.1	1800249	1798936	phosphopyruvate hydratase	Match
NC_009337.1	1800429	1802501	elongation factor G	Match
NC_009337.1	1803229	1802507	polyprenol monophosphomannose synthase	Partial match
NC_009337.1	1804087	1803326	4Fe-4S dicluster domain-containing protein	Match
NC_009337.1	1806390	1804186	photosystem I reaction center subunit IX	Match
NC_009337.1	1806794	1807600	diaminopimelate epimerase	Match
NC_009337.1	1807737	1807904	rubredoxin	Partial match
NC_009337.1	1808814	1808002	monofunctional biosynthetic peptidoglycan transglycosylase	Partial match
NC_009337.1	1808905	1809330	cytochrome c	Match
NC_009337.1	1809471	1809396	tRNA-Arg	Match
NC_009337.1	1811374	1809530	DNA mismatch repair endonuclease MutL	Match
NC_009337.1	1812744	1811458	CinA family nicotinamide mononucleotide deamidase-related protein	Match
NC_009337.1	1815220	1812761	bifunctional aspartate kinase/homoserine dehydrogenase I	Match
NC_009337.1	1816296	1815421	F0F1 ATP synthase subunit gamma	Match
NC_009337.1	1817928	1816348	F0F1 ATP synthase subunit alpha	Match
NC_009337.1	1818143	1819105	homoserine kinase	Match
NC_009337.1	1819142	1820455	threonine synthase	Match
NC_009337.1	1820459	1821151	1-acyl-sn-glycerol-3-phosphate acyltransferase	Match
NC_009337.1	1821627	1821160	6,7-dimethyl-8-ribityllumazine synthase	Match
NC_009337.1	1822288	1821647	SIS domain-containing protein	Match
NC_009337.1	1823218	1822391	ion transporter	Match
NC_009337.1	1824349	1823294	uroporphyrinogen decarboxylase	Match
NC_009337.1	1825304	1824456	succinate dehydrogenase	Match
NC_009337.1	1826354	1825320	succinate dehydrogenase/fumarate reductase iron-sulfur subunit	Match
NC_009337.1	1828071	1826368	FAD-binding protein	Match
NC_009337.1	1828660	1828214	CBS domain-containing protein	Match
NC_009337.1	1829536	1828889	MBL fold metallo-hydrolase	Match
NC_009337.1	1829853	1829545	hypothetical protein	Match
NC_009337.1	1833088	1829882	efflux RND transporter permease subunit	Match
NC_009337.1	1833501	1833085	hypothetical protein	Match
NC_009337.1	1834867	1833542	TolC family protein	Match
NC_009337.1	1835107	1834874	metal-sensitive transcriptional regulator	Match
NC_009337.1	1835843	1835244	DUF1997 domain-containing protein	Match
NC_009337.1	1836145	1836372	hypothetical protein	Match
NC_009337.1	1836462	1837466	phosphotransferase	Match
NC_009337.1	1837466	1838425	NDP-sugar synthase	Match
NC_009337.1	1838422	1839582	DUF1343 domain-containing protein	Match
NC_009337.1	1839604	1841004	sodium:solute symporter	Match
NC_009337.1	1841045	1842913	PAS domain S-box protein	No match	Cell signaling
NC_009337.1	1842822	1844432	response regulator	No match	Cell signaling
NC_009337.1	1844429	1844791	response regulator	Partial match
NC_009337.1	1845506	1844823	SDR family oxidoreductase	No match	Other metabolism
NC_009337.1	1845679	1847007	pentapeptide repeat-containing protein	Match
NC_009337.1	1847029	1847262	hypothetical protein	Match
NC_009337.1	1847578	1847288	hypothetical protein	Match
NC_009337.1	1848395	1847712	diguanylate cyclase	Match
NC_009337.1	1850446	1848521	potassium transporter Kup	Match
NC_009337.1	1850978	1851475	septal ring lytic transglycosylase RlpA family protein	Match
NC_009337.1	1852215	1851499	DUF1847 domain-containing protein	No match	Hypothetical
NC_009337.1	1852496	1853716	ATP-binding protein	No match	General function
NC_009337.1	1853950	1854927	ferrochelatase	No match	Other metabolism
NC_009337.1	1855180	1856202	6-phosphofructokinase	No match	Other metabolism
NC_009337.1	1856222	1856638	hypothetical protein	No match	Hypothetical
NC_009337.1	1856782	1857696	prohibitin family protein	No match	General function
NC_009337.1	1859206	1857785	tRNA uridine-5-carboxymethylaminomethyl(34) synthesis GTPase MnmE	Partial match
NC_009337.1	1859511	1859203	hypothetical protein	No match	Hypothetical
NC_009337.1	1859652	1860482	nucleoside triphosphate pyrophosphohydrolase	Partial match
NC_009337.1	1861094	1860435	phospholipase	Partial match
NC_009337.1	1864452	1861150	maltose alpha-D-glucosyltransferase	Match
NC_009337.1	1866522	1864510	alpha-1,4-glucan--maltose-1-phosphate maltosyltransferase	Match
NC_009337.1	1866830	1867861	peptide chain release factor 2	Match
NC_009337.1	1867871	1868671	metallophosphoesterase	Match
NC_009337.1	1868692	1869558	peptidoglycan DD-metalloendopeptidase family protein	Match
NC_009337.1	1870681	1871649	hypothetical protein	Match
NC_009337.1	1870703	1869555	hypothetical protein	Match
NC_009337.1	1871963	1871706	zinc ribbon domain-containing protein	Match
NC_009337.1	1872090	1872878	DNA repair protein RecO	Match
NC_009337.1	1872988	1874283	glutamate-1-semialdehyde 2,1-aminomutase	Match
NC_009337.1	1874724	1874389	DUF190 domain-containing protein	Match
NC_009337.1	1875104	1874724	fluoride efflux transporter CrcB	Partial match
NC_009337.1	1875347	1875117	hypothetical protein	No match	Hypothetical
NC_009337.1	1875646	1878438	molybdopterin-dependent oxidoreductase	No match	Other metabolism
NC_009337.1	1878457	1879056	4Fe-4S dicluster domain-containing protein	No match	Other metabolism
NC_009337.1	1879075	1879989	polysulfide reductase NrfD	No match	Sulfur cycling
NC_009337.1	1880072	1880626	molecular chaperone TorD family protein	No match	Stress response
NC_009337.1	1882269	1880836	FAD-dependent oxidoreductase	Match
NC_009337.1	1882424	1882852	Holliday junction resolvase RuvX	Match
NC_009337.1	1882968	1883543	orotate phosphoribosyltransferase	Match
NC_009337.1	1883540	1884409	prephenate dehydrogenase/arogenate dehydrogenase family protein	Match
NC_009337.1	1884406	1885251	NAD(+)/NADH kinase	Partial match
NC_009337.1	1885839	1885288	3-deoxy-D-manno-octulosonate 8-phosphate phosphatase	Partial match
NC_009337.1	1886705	1885875	3-deoxy-8-phosphooctulonate synthase	Match
NC_009337.1	1886829	1888154	AAA domain-containing protein	Match
NC_009337.1	1888154	1889299	glycoside hydrolase family 3	Match
NC_009337.1	1889296	1889796	histidine phosphatase family protein	Match
NC_009337.1	1890818	1889817	NAD(P)H-dependent glycerol-3-phosphate dehydrogenase	Match
NC_009337.1	1891544	1890837	glycerol-3-phosphate acyltransferase	Match
NC_009337.1	1892600	1891611	phosphoribosylformylglycinamidine cyclo-ligase	Match
NC_009337.1	1894079	1892664	lysine-sensitive aspartokinase 3	Match
NC_009337.1	1894272	1895144	50S ribosomal protein L11 methyltransferase	Match
NC_009337.1	1895171	1896106	Ppx/GppA family phosphatase	Match
NC_009337.1	1897298	1896072	SAM-dependent methyltransferase	Match
NC_009337.1	1898578	1897295	adenosylmethionine--8-amino-7-oxononanoate transaminase	Match
NC_009337.1	1899299	1898610	ATP-dependent dethiobiotin synthetase BioD	Match
NC_009337.1	1900078	1899296	malonyl-ACP O-methyltransferase BioC	Match
NC_009337.1	1900755	1900075	DUF452 family protein	Match
NC_009337.1	1901915	1900752	8-amino-7-oxononanoate synthase	Match
NC_009337.1	1902923	1901925	biotin synthase BioB	Match
NC_009337.1	1903931	1902954	biotin--[acetyl-CoA-carboxylase] ligase	Match
NC_009337.1	1905702	1904035	N-acetylmuramoyl-L-alanine amidase	Match
NC_009337.1	1905972	1908383	type I DNA topoisomerase	Match
NC_009337.1	1910502	1908373	ferrous iron transport protein B	Match
NC_009337.1	1910792	1910499	ferrous iron transport protein A	Match
NC_009337.1	1911306	1910923	histidine triad nucleotide-binding protein	Match
NC_009337.1	1912626	1911310	HlyC/CorC family transporter	Match
NC_009337.1	1913258	1912824	cupin domain-containing protein	Partial match
NC_009337.1	1913453	1914109	hypothetical protein	Match
NC_009337.1	1914889	1914116	succinate dehydrogenase/fumarate reductase iron-sulfur subunit	Match
NC_009337.1	1916862	1914922	fumarate reductase/succinate dehydrogenase flavoprotein subunit	Match
NC_009337.1	1917547	1916882	succinate dehydrogenase cytochrome b subunit	Match
NC_009337.1	1918636	1917650	dihydroorotate dehydrogenase-like protein	Match
NC_009337.1	1920224	1918737	alkaline phosphatase	No match	General function
NC_009337.1	1921096	1920296	alpha/beta fold hydrolase	Partial match
NC_009337.1	1921253	1921762	septal ring lytic transglycosylase RlpA family protein	Match
NC_009337.1	1922443	1921775	fructose-6-phosphate aldolase	Match
NC_009337.1	1923502	1922453	deoxyhypusine synthase	Match
NC_009337.1	1923641	1923543	signal recognition particle sRNA small type	Match
NC_009337.1	1923866	1924894	tryptophan--tRNA ligase	Match
NC_009337.1	1924891	1925586	beta-phosphoglucomutase family hydrolase	Match
NC_009337.1	1925594	1927252	arginine--tRNA ligase	Match
NC_009337.1	1927853	1927272	nicotinate (nicotinamide) nucleotide adenylyltransferase	Match
NC_009337.1	1928761	1927865	outer membrane protein assembly factor BamD	Match
NC_009337.1	1929751	1929527	DUF1566 domain-containing protein	No match	Hypothetical
NC_009337.1	1930265	1929990	transposase	No match	Mobile element
NC_009337.1	1931366	1930596	nucleotidyl transferase AbiEii/AbiGii toxin family protein	No match	Cell defence
NC_009337.1	1932274	1931438	hypothetical protein	No match	Hypothetical
NC_009337.1	1933252	1933085	response regulator receiver protein	No match	Cell signaling
NC_009337.1	1933637	1933565	tRNA-Ala	Match
NC_009337.1	1934261	1933716	F0F1 ATP synthase subunit delta	Match
NC_009337.1	1934802	1934275	F0F1 ATP synthase subunit B	Match
NC_009337.1	1935125	1934898	ATP synthase F0 subunit C	Match
NC_009337.1	1936290	1935244	F0F1 ATP synthase subunit A	Match
NC_009337.1	1936673	1936287	hypothetical protein	Match
NC_009337.1	1936957	1936712	AtpZ/AtpI family protein	Match
NC_009337.1	1937145	1937954	peptidoglycan editing factor PgeF	Match
NC_009337.1	1938076	1939095	C-20 methyltransferase BchU	Partial match
NC_009337.1	1940474	1939179	4-hydroxybutyrate CoA-transferase	Partial match
NC_009337.1	1941784	1940507	cell division protein FtsZ	Match
NC_009337.1	1943119	1941827	cell division protein FtsA	Match
NC_009337.1	1943962	1943165	FtsQ-type POTRA domain-containing protein	Match
NC_009337.1	1945420	1944011	UDP-N-acetylmuramate--L-alanine ligase	Match
NC_009337.1	1946532	1945426	undecaprenyldiphospho-muramoylpentapeptide beta-N-acetylglucosaminyltransferase	Match
NC_009337.1	1947692	1946529	cell division protein FtsW	Match
NC_009337.1	1949089	1947692	UDP-N-acetylmuramoyl-L-alanine--D-glutamate ligase	Match
NC_009337.1	1950189	1949086	phospho-N-acetylmuramoyl-pentapeptide-transferase	Match
NC_009337.1	1951621	1950200	UDP-N-acetylmuramoyl-tripeptide--D-alanyl-D-alanine ligase	Match
NC_009337.1	1953075	1951618	UDP-N-acetylmuramoyl-L-alanyl-D-glutamate--2,6-diaminopimelate ligase	Match
NC_009337.1	1955156	1953162	transpeptidase family protein	Match
NC_009337.1	1955639	1955184	hypothetical protein	Match
NC_009337.1	1956628	1955645	16S rRNA (cytosine(1402)-N(4))-methyltransferase RsmH	Match
NC_009337.1	1957098	1956628	division/cell wall cluster transcriptional repressor MraZ	Match
NC_009337.1	1957212	1957727	NYN domain-containing protein	Match
NC_009337.1	1957774	1958100	chorismate mutase	Match
NC_009337.1	1958123	1959097	endolytic transglycosylase MltG	Match
NC_009337.1	1959217	1960410	phosphoglycerate kinase	Match
NC_009337.1	1960440	1961255	rhomboid family intramembrane serine protease	Match
NC_009337.1	1961252	1961686	DUF1232 domain-containing protein	Match
NC_009337.1	1963107	1961653	23S rRNA (uracil(1939)-C(5))-methyltransferase RlmD	Match
NC_009337.1	1963700	1963107	phosphatase PAP2 family protein	Match
NC_009337.1	1965458	1963716	membrane protein insertase YidC	Match
NC_009337.1	1965727	1965461	membrane protein insertion efficiency factor YidD	Match
NC_009337.1	1966263	1965784	ribonuclease P protein component	Match
NC_009337.1	1966447	1966286	50S ribosomal protein L34	Match
A The gene annotation data for Cpv-DSM265 were taken from NCBI.
B The Cpv-DSM265 genes with matches to AL Ca. Chlorobium antarcticum MAG genes are denoted as: 'Match', genes with full length matches; 'Partial match', genes with less than full length matches. The genes with no matches to AL_ref MAG genes are highlighted with a yellow background colour. The sequence identitity of the matches varied between 75–98% (on average 86%).
