# Supplementary material for: Remarkably coherent population structure for a dominant Antarctic Chlorobium species
Source: Microbiome. 2021 Nov 26;9:231. doi: 10.1186/s40168-021-01173-z (PMC8620254; doi:10.1186/s40168-021-01173-z)
Supplement: Supplementary file 5 — Additional file 4. Data for Ca. Chlorobium antarcticum marker gene and protein analyses. Supplementary dataset. [file 40168_2021_1173_MOESM5_ESM.xlsx]

## Sheet: Summary
Additional file 4: Dataset S3 Alignment data for Ca. Chlorobium antarcticum marker sequences to IMG metagenome and genome databases.
	Marker sequences: 16S rRNA gene and FmoA protein.
	16S rRNA align - metagenomes
	16S rRNA align - genomes
	FmoA align - genomes
	IMG databases

## Sheet: 16S rRNA align - metagenomes
Query species nameA	Subject IMG Gene IDB	Subject metagenome name	IMG Genome ID	Subject species habitatC	Geographic location	Identity (%)	Query Start	Query End	Subject Start	Subject End	Bit Score	E-value	Subject Length
Ca. Chlorobium antarcticum	Ga0302067_1000144	Combined Assembly of Gp0060435, Gp0060442 - Site 230 with 0.1UM filter - spades	3300028204	Ace Lake	Antarctica	100	1	1505	1	1505	2780	0	1505
Ca. Chlorobium antarcticum	Ga0078900_115623680	Marine microbial communities from Ace Lake, Antarctica - Combined Assembly of Gp0060494, Gp0060379: dna-ANTRC232_01_hybrid_final.fasta	3300016486	Ace Lake	Antarctica	100	1	1505	1	1505	2780	0	1505
Ca. Chlorobium antarcticum	Ga0302058_1000081	Marine microbial communities from Ace Lake, Antarctica - Site 229 with 0.8UM filter - spades	3300028302	Ace Lake	Antarctica	100	1	1505	1	1505	2780	0	1505
Ca. Chlorobium antarcticum	Ga0302060_1000149	Marine microbial communities from Ace Lake, Antarctica - Site 230 with 0.8UM filter - spades	3300028201	Ace Lake	Antarctica	100	1	1505	1	1505	2780	0	1505
Ca. Chlorobium antarcticum	Ga0302061_1000146	Marine microbial communities from Ace Lake, Antarctica - Site 230 with 3.0UM filter - spades	3300028203	Ace Lake	Antarctica	100	1	1505	1	1505	2780	0	1505
Ca. Chlorobium antarcticum	Ga0208647_100001746	Saline lake microbial communities from Ace Lake, Antarctica - Antarctic Ace Lake Metagenome 02UKA (SPAdes)	3300025362	Ace Lake	Antarctica	100	1	1505	1	1505	2780	0	1505
Ca. Chlorobium antarcticum	Ga0075122_10000054107	Saline lake microbial communities from Ace Lake, Antarctica - Antarctic Ace Lake Metagenome 02UKB	3300005915	Ace Lake	Antarctica	100	1	1505	1	1505	2780	0	1505
Ca. Chlorobium antarcticum	Ga0208904_100000246	Saline lake microbial communities from Ace Lake, Antarctica - Antarctic Ace Lake Metagenome 02UKB (SPAdes)	3300025669	Ace Lake	Antarctica	100	1	1505	1	1505	2780	0	1505
Ca. Chlorobium antarcticum	Ga0075112_10009475	Saline lake microbial communities from Ace Lake, Antarctica - Antarctic Ace Lake Metagenome 02UKF	3300005909	Ace Lake	Antarctica	100	1	1505	1	1505	2780	0	1505
Ca. Chlorobium antarcticum	Ga0208901_100001546	Saline lake microbial communities from Ace Lake, Antarctica - Antarctic Ace Lake Metagenome 02UKF (SPAdes)	3300025380	Ace Lake	Antarctica	100	1	1505	1	1505	2780	0	1505
Ca. Chlorobium antarcticum	Ga0075121_1000011107	Saline lake microbial communities from Ace Lake, Antarctica - Antarctic Ace Lake Metagenome 02UKG	3300005932	Ace Lake	Antarctica	100	1	1505	1	1505	2780	0	1505
Ca. Chlorobium antarcticum	Ga0207996_100003546	Saline lake microbial communities from Ace Lake, Antarctica - Antarctic Ace Lake Metagenome 02UKG (SPAdes)	3300025586	Ace Lake	Antarctica	100	1	1505	1	1505	2780	0	1505
Ca. Chlorobium antarcticum	Ga0075115_10000004155	Saline lake microbial communities from Ace Lake, Antarctica - Antarctic Ace Lake Metagenome 02UKH	3300005917	Ace Lake	Antarctica	100	1	1505	1	1505	2780	0	1505
Ca. Chlorobium antarcticum	Ga0208902_1000001413	Saline lake microbial communities from Ace Lake, Antarctica - Antarctic Ace Lake Metagenome 02UKH (SPAdes)	3300025628	Ace Lake	Antarctica	100	1	1505	1	1505	2780	0	1505
Ca. Chlorobium antarcticum	Ga0075111_100084319	Saline lake microbial communities from Ace Lake, Antarctica - Antarctic Ace Lake Metagenome 02UKK	3300005911	Ace Lake	Antarctica	100	1	1505	1	1505	2780	0	1505
Ca. Chlorobium antarcticum	Ga0208900_100000946	Saline lake microbial communities from Ace Lake, Antarctica - Antarctic Ace Lake Metagenome 02UKK (SPAdes)	3300025433	Ace Lake	Antarctica	100	1	1505	1	1505	2780	0	1505
Ca. Chlorobium antarcticum	Ga0075120_1000001145	Saline lake microbial communities from Ace Lake, Antarctica - Antarctic Ace Lake Metagenome 02UKL	3300005916	Ace Lake	Antarctica	100	1	1505	1	1505	2780	0	1505
Ca. Chlorobium antarcticum	Ga0208648_100000146	Saline lake microbial communities from Ace Lake, Antarctica - Antarctic Ace Lake Metagenome 02UKL (SPAdes)	3300025642	Ace Lake	Antarctica	100	1	1505	1	1505	2780	0	1505
Ca. Chlorobium antarcticum	Ga0075114_1000007929	Saline lake microbial communities from Ace Lake, Antarctica - Antarctic Ace Lake Metagenome 02UKM	3300005919	Ace Lake	Antarctica	100	1	1505	1	1505	2780	0	1505
Ca. Chlorobium antarcticum	Ga0208279_100001345	Saline lake microbial communities from Ace Lake, Antarctica - Antarctic Ace Lake Metagenome 02UKM (SPAdes)	3300025649	Ace Lake	Antarctica	100	1	1505	1	1505	2780	0	1505
Ca. Chlorobium antarcticum	Ga0075124_1000000616	Saline lake microbial communities from Ace Lake, Antarctica - Antarctic Ace Lake Metagenome 02UKS	3300005936	Ace Lake	Antarctica	100	1	1505	1	1505	2780	0	1505
Ca. Chlorobium antarcticum	Ga0208905_100000146	Saline lake microbial communities from Ace Lake, Antarctica - Antarctic Ace Lake Metagenome 02UKS (SPAdes)	3300025661	Ace Lake	Antarctica	100	1	1505	1	1505	2780	0	1505
Ca. Chlorobium antarcticum	Ga0075123_10000019110	Saline lake microbial communities from Ace Lake, Antarctica - Antarctic Ace Lake Metagenome 02UKX	3300005939	Ace Lake	Antarctica	100	1	1505	1	1505	2780	0	1505
Ca. Chlorobium antarcticum	Ga0208771_1000004221	Saline lake microbial communities from Ace Lake, Antarctica - Antarctic Ace Lake Metagenome 02UKX (SPAdes)	3300025698	Ace Lake	Antarctica	100	1	1505	1	1505	2780	0	1505
Ca. Chlorobium antarcticum	Ga0208769_10031061	Saline lake microbial communities from Ace Lake, Antarctica- Antarctic Ace Lake Metagenome 02UKC (SPAdes)	3300025697	Ace Lake	Antarctica	100	1	1505	1	1505	2780	0	1505
Ca. Chlorobium antarcticum	Ga0222680_10020434	Saline water microbial communities from Ace Lake, Antarctica - #1004	3300023434	Ace Lake	Antarctica	100	1	1505	1	1505	2780	0	1505
Ca. Chlorobium antarcticum	Ga0222681_100044612	Saline water microbial communities from Ace Lake, Antarctica - #1006	3300022838	Ace Lake	Antarctica	100	1	1505	1	1505	2780	0	1505
Ca. Chlorobium antarcticum	Ga0222684_10085473	Saline water microbial communities from Ace Lake, Antarctica - #1075	3300023295	Ace Lake	Antarctica	100	1	1505	1	1505	2780	0	1505
Ca. Chlorobium antarcticum	Ga0222689_1000026108	Saline water microbial communities from Ace Lake, Antarctica - #1231	3300023231	Ace Lake	Antarctica	100	1	1505	1	1505	2780	0	1505
Ca. Chlorobium antarcticum	Ga0222690_10000211	Saline water microbial communities from Ace Lake, Antarctica - #1234	3300023227	Ace Lake	Antarctica	100	1	1505	1	1505	2780	0	1505
Ca. Chlorobium antarcticum	Ga0222691_1000012108	Saline water microbial communities from Ace Lake, Antarctica - #1237	3300022851	Ace Lake	Antarctica	100	1	1505	1	1505	2780	0	1505
Ca. Chlorobium antarcticum	Ga0307929_100004046	Saline water microbial communities from Ace Lake, Antarctica - #1330	3300031697	Ace Lake	Antarctica	100	1	1505	1	1505	2780	0	1505
Ca. Chlorobium antarcticum	Ga0222693_10001346	Saline water microbial communities from Ace Lake, Antarctica - #1331	3300022826	Ace Lake	Antarctica	100	1	1505	1	1505	2780	0	1505
Ca. Chlorobium antarcticum	Ga0222694_100000546	Saline water microbial communities from Ace Lake, Antarctica - #1333	3300023292	Ace Lake	Antarctica	100	1	1505	1	1505	2780	0	1505
Ca. Chlorobium antarcticum	Ga0222635_100010829	Saline water microbial communities from Ace Lake, Antarctica - #139	3300023234	Ace Lake	Antarctica	100	1	1505	1	1505	2780	0	1505
Ca. Chlorobium antarcticum	Ga0222695_100000146	Saline water microbial communities from Ace Lake, Antarctica - #1398	3300023253	Ace Lake	Antarctica	100	1	1505	1	1505	2780	0	1505
Ca. Chlorobium antarcticum	Ga0222696_100000146	Saline water microbial communities from Ace Lake, Antarctica - #1400	3300023233	Ace Lake	Antarctica	100	1	1505	1	1505	2780	0	1505
Ca. Chlorobium antarcticum	Ga0222697_100001846	Saline water microbial communities from Ace Lake, Antarctica - #1402	3300022868	Ace Lake	Antarctica	100	1	1505	1	1505	2780	0	1505
Ca. Chlorobium antarcticum	Ga0222636_1000001597	Saline water microbial communities from Ace Lake, Antarctica - #141	3300022854	Ace Lake	Antarctica	100	1	1505	1	1505	2780	0	1505
Ca. Chlorobium antarcticum	Ga0222637_1000001513	Saline water microbial communities from Ace Lake, Antarctica - #143	3300023435	Ace Lake	Antarctica	100	1	1505	1	1505	2780	0	1505
Ca. Chlorobium antarcticum	Ga0222698_100000146	Saline water microbial communities from Ace Lake, Antarctica - #1450	3300022860	Ace Lake	Antarctica	100	1	1505	1	1505	2780	0	1505
Ca. Chlorobium antarcticum	Ga0222699_100000448	Saline water microbial communities from Ace Lake, Antarctica - #1452	3300022846	Ace Lake	Antarctica	100	1	1505	1	1505	2780	0	1505
Ca. Chlorobium antarcticum	Ga0222700_1000006154	Saline water microbial communities from Ace Lake, Antarctica - #1454	3300023061	Ace Lake	Antarctica	100	1	1505	1	1505	2780	0	1505
Ca. Chlorobium antarcticum	Ga0222701_100000132	Saline water microbial communities from Ace Lake, Antarctica - #1502	3300022884	Ace Lake	Antarctica	100	1	1505	1	1505	2780	0	1505
Ca. Chlorobium antarcticum	Ga0222702_1000003211	Saline water microbial communities from Ace Lake, Antarctica - #1504	3300023299	Ace Lake	Antarctica	100	1	1505	1	1505	2780	0	1505
Ca. Chlorobium antarcticum	Ga0222703_1000001413	Saline water microbial communities from Ace Lake, Antarctica - #1506	3300023256	Ace Lake	Antarctica	100	1	1505	1	1505	2780	0	1505
Ca. Chlorobium antarcticum	Ga0222639_100003749	Saline water microbial communities from Ace Lake, Antarctica - #185	3300023262	Ace Lake	Antarctica	100	1	1505	1	1505	2780	0	1505
Ca. Chlorobium antarcticum	Ga0222642_100002443	Saline water microbial communities from Ace Lake, Antarctica - #229	3300022887	Ace Lake	Antarctica	100	1	1505	1	1505	2780	0	1505
Ca. Chlorobium antarcticum	Ga0307928_1000033629	Saline water microbial communities from Ace Lake, Antarctica - #232	3300031227	Ace Lake	Antarctica	100	1	1505	1	1505	2780	0	1505
Ca. Chlorobium antarcticum	Ga0222656_100001645	Saline water microbial communities from Ace Lake, Antarctica - #472	3300022834	Ace Lake	Antarctica	100	1	1505	1	1505	2780	0	1505
Ca. Chlorobium antarcticum	Ga0222657_100000146	Saline water microbial communities from Ace Lake, Antarctica - #474	3300023241	Ace Lake	Antarctica	100	1	1505	1	1505	2780	0	1505
Ca. Chlorobium antarcticum	Ga0222658_1000002597	Saline water microbial communities from Ace Lake, Antarctica - #476	3300023257	Ace Lake	Antarctica	100	1	1505	1	1505	2780	0	1505
Ca. Chlorobium antarcticum	Ga0222665_100000146	Saline water microbial communities from Ace Lake, Antarctica - #653	3300022864	Ace Lake	Antarctica	100	1	1505	1	1505	2780	0	1505
Ca. Chlorobium antarcticum	Ga0222666_1000001596	Saline water microbial communities from Ace Lake, Antarctica - #655	3300024048	Ace Lake	Antarctica	100	1	1505	1	1505	2780	0	1505
Ca. Chlorobium antarcticum	Ga0222667_1000001597	Saline water microbial communities from Ace Lake, Antarctica - #657	3300022890	Ace Lake	Antarctica	100	1	1505	1	1505	2780	0	1505
Ca. Chlorobium antarcticum	Ga0222671_10053984	Saline water microbial communities from Ace Lake, Antarctica - #797	3300022856	Ace Lake	Antarctica	100	1	1505	1	1505	2780	0	1505
Ca. Chlorobium antarcticum	Ga0222672_10010467	Saline water microbial communities from Ace Lake, Antarctica - #799	3300022859	Ace Lake	Antarctica	100	1	1505	1	1505	2780	0	1505
Ca. Chlorobium antarcticum	Ga0222673_10017774	Saline water microbial communities from Ace Lake, Antarctica - #801	3300022821	Ace Lake	Antarctica	100	1	1505	1	1505	2780	0	1505
Ca. Chlorobium antarcticum	Ga0222626_100002246	Saline water microbial communities from Ace Lake, Antarctica - #91	3300022882	Ace Lake	Antarctica	100	1	1505	1	1505	2780	0	1505
Ca. Chlorobium antarcticum	Ga0222627_100001246	Saline water microbial communities from Ace Lake, Antarctica - #93	3300023244	Ace Lake	Antarctica	100	1	1505	1	1505	2780	0	1505
Ca. Chlorobium antarcticum	Ga0222677_10089881	Saline water microbial communities from Ace Lake, Antarctica - #935	3300022855	Ace Lake	Antarctica	100	1	1505	1	1505	2780	0	1505
Ca. Chlorobium antarcticum	Ga0222678_100002646	Saline water microbial communities from Ace Lake, Antarctica - #937	3300023249	Ace Lake	Antarctica	100	1	1505	1	1505	2780	0	1505
Ca. Chlorobium antarcticum	Ga0222628_1000001597	Saline water microbial communities from Ace Lake, Antarctica - #95	3300022871	Ace Lake	Antarctica	100	1	1505	1	1505	2780	0	1505
Ca. Chlorobium antarcticum	Ga0228869_1344	Sorted cell/s from Ace Lake middle layer water, Antarctica - Uncultured microbe JGI AceGSB.SYBR.01.D19	3300023827	Ace Lake	Antarctica	100	1	1505	1	1505	2780	0	1505
Ca. Chlorobium antarcticum	Ga0307990_10012207	Marine microbial communities from Ellis Fjord, Antarctic Ocean - #129	3300031645	Ellis Fjord	Antarctica	100	1	1505	1	1505	2780	0	1505
Ca. Chlorobium antarcticum	Ga0307991_100002046	Marine microbial communities from Ellis Fjord, Antarctic Ocean - #131	3300031657	Ellis Fjord	Antarctica	100	1	1505	1	1505	2780	0	1505
Ca. Chlorobium antarcticum	Ga0307992_100001045	Marine microbial communities from Ellis Fjord, Antarctic Ocean - #133	3300031601	Ellis Fjord	Antarctica	100	1	1505	1	1505	2780	0	1505
Ca. Chlorobium antarcticum	Ga0307987_100000446	Marine microbial communities from Ellis Fjord, Antarctic Ocean - #181	3300031631	Ellis Fjord	Antarctica	100	1	1505	1	1505	2780	0	1505
Ca. Chlorobium antarcticum	Ga0307988_1000004168	Marine microbial communities from Ellis Fjord, Antarctic Ocean - #183	3300031741	Ellis Fjord	Antarctica	100	1	1505	1	1505	2780	0	1505
Ca. Chlorobium antarcticum	Ga0307989_100001912	Marine microbial communities from Ellis Fjord, Antarctic Ocean - #185	3300031603	Ellis Fjord	Antarctica	100	1	1505	1	1505	2780	0	1505
Ca. Chlorobium antarcticum	Ga0075116_100126514	Saline lake microbial communities from Ace Lake, Antarctica- Antarctic Ace Lake Metagenome 02UKC	3300005918	Ace Lake	Antarctica	100	6	1505	1	1500	2771	0	1500
Ca. Chlorobium antarcticum	Ga0222686_10042813	Saline water microbial communities from Ace Lake, Antarctica - #1159	3300023501	Ace Lake	Antarctica	100	1	1113	1	1113	2056	0	1113
Ca. Chlorobium antarcticum	Ga0075113_10244631	Saline lake microbial communities from Ace Lake, Antarctica - Antarctic Ace Lake Metagenome 02UKA	3300005910	Ace Lake	Antarctica	100	476	1479	1	1004	1855	0	1004
Ca. Chlorobium antarcticum	Ga0207997_10975471	Saline lake microbial communities from Ace Lake, Antarctica - Antarctic Ace Lake Metagenome 02UKN (SPAdes)	3300025736	Ace Lake	Antarctica	100	274	1259	1	986	1821	0	986
Ca. Chlorobium antarcticum	Ga0222687_10076061	Saline water microbial communities from Ace Lake, Antarctica - #1163	3300022844	Ace Lake	Antarctica	100	522	1505	1	984	1818	0	984
Ca. Chlorobium antarcticum	Ga0222638_10033801	Saline water microbial communities from Ace Lake, Antarctica - #183	3300023298	Ace Lake	Antarctica	100	1	849	1	849	1568	0	849
Ca. Chlorobium antarcticum	Ga0075130_1011484	Saline lake microbial communities from Deep Lake, Antarctica, in enrichment culture - Antarctic Deep Lake Metagenome VIREN14	3300005927	Deep Lake	Antarctica	100	1	1035	1	1035	1912	0	1035
Ca. Chlorobium antarcticum	Ga0307985_100615772	Marine microbial communities from Ellis Fjord, Antarctic Ocean - #80	3300031629	Ellis Fjord	Antarctica	100	1	1236	1	1236	2283	0	1236
Ca. Chlorobium antarcticum	Ga0307986_100340591	Marine microbial communities from Ellis Fjord, Antarctic Ocean - #82	3300031659	Ellis Fjord	Antarctica	100	1	959	1	959	1772	0	959
Ca. Chlorobium antarcticum	Ga0302071_1042001	Combined Assembly of Gp0060494, Gp0060379 - Site 232 with 0.1UM filter - spades	3300028228	Ace Lake	Antarctica	99	222	1505	1	1284	2361	0	1284
Ca. Chlorobium antarcticum	Ga0302068_1005931	Combined Assembly of Gp0060441, Gp0060376 - Site 229 with 0.1UM filter - spades	3300028219	Ace Lake	Antarctica	99	1	865	1	862	1578	0	862
Ca. Chlorobium antarcticum	Ga0302068_1011694	Combined Assembly of Gp0060441, Gp0060376 - Site 229 with 0.1UM filter - spades	3300028219	Ace Lake	Antarctica	99	736	1505	1	769	1415	0	769
Ca. Chlorobium antarcticum	Ga0302055_1016101	Marine microbial communities from Ace Lake, Antarctica - Site 227 with 0.8UM filter - spades	3300028226	Ace Lake	Antarctica	99	1	748	1	748	1376	0	748
Ca. Chlorobium antarcticum	Ga0302070_1052281	Combined Assembly of Gp0060490, Gp0060398 - Site 227 with 0.1UM filter - spades	3300028296	Ace Lake	Antarctica	99	1	714	1	713	1290	0	713
Ca. Chlorobium antarcticum	Ga0074646_1001464	Saline benthic water microbial community from Etoliko Lagoon, Greece	3300005470	Etoliko Lagoon	Greece	99	1	1505	1	1504	2678	0	1504
Ca. Chlorobium antarcticum	Ga0074648_10138104	Saline surface water microbial communities from Etoliko Lagoon, Greece - halocline_water	3300005512	Etoliko Lagoon	Greece	99	1	1505	1	1504	2678	0	1504
Ca. Chlorobium antarcticum	JGI11705J14877_100221261	Saline surface water microbial communities from Etoliko Lagoon, Greece - halocline water (15 m)	3300001419	Etoliko Lagoon	Greece	99	473	1422	1	950	1722	0	950
Ca. Chlorobium antarcticum	JGI997J19993_10032244	Saline benthic water microbial community from Etoliko Lagoon, Greece	3300001737	Etoliko Lagoon	Greece	99	478	1422	1	945	1712	0	945
Ca. Chlorobium antarcticum	Ga0370464_129550031	Freshwater microbial communities from meromitic lake A, Ellesmere Island, Canada - Sample 22m re-analysis2	3300033443	Lake A	Ellesmere Island, Canada	99	1	978	1	977	1727	0	977
Ca. Chlorobium antarcticum	Ga0127411_10097761	Aquatic microbial communities from different depth of meromictic Siders Pond, Falmouth, Massachusetts; Cast 1, 12m depth; DNA IDBA-UD	3300009484	Siders Ponds	Massachusetts, USA	99	1	1505	1	1504	2684	0	1504
Ca. Chlorobium antarcticum	Ga0127405_10398791	Aquatic microbial communities from different depth of meromictic Siders Pond, Falmouth, Massachusetts; Cast 1, 10m depth; DNA IDBA-UD	3300009480	Siders Ponds	Massachusetts, USA	99	1	1167	1	1166	2065	0	1166
Ca. Chlorobium antarcticum	Ga0130023_1014564	Aquatic microbial communities from different depth of meromictic Siders Pond, Falmouth, Massachusetts; Cast 1, 12m depth; RNA IDBA-UD	3300009558	Siders Ponds	Massachusetts, USA	99	736	1505	1	770	1395	0	770
Ca. Chlorobium antarcticum	Ga0131970_1000653	Aquatic microbial communities from different depth of meromictic Siders Pond, Falmouth, Massachusetts; Cast 2, 8m depth; RNA IDBA-UD	3300009831	Siders Ponds	Massachusetts, USA	99	737	1502	1	766	1387	0	769
Ca. Chlorobium antarcticum	Ga0132186_1014121	Aquatic microbial communities from different depth of meromictic Siders Pond, Falmouth, Massachusetts; Cast 3, 12m depth; RNA IDBA-UD	3300009866	Siders Ponds	Massachusetts, USA	99	639	1391	1	753	1363	0	753
Ca. Chlorobium antarcticum	Ga0208742_10029344	Freshwater microbial communities from Crystal Bog, Wisconsin, USA - CBH28Sep08 (SPAdes)	3300025437	Crystal Bog	Wisconsin, USA	98	590	1505	1	916	1570	0	916
Ca. Chlorobium antarcticum	Ga0169465_10092561	Synthetic microbial communities for library methods comparison from University of Liverpool, United Kingdom - Mg4	3300014779	Lab-generated synthetic community	Liverpool, UK	98	465	1504	2	1041	1832	0	1043
Ca. Chlorobium antarcticum	Ga0169464_10114011	Synthetic microbial communities for library methods comparison from University of Liverpool, United Kingdom - Mg5	3300014942	Lab-generated synthetic community	Liverpool, UK	98	668	1504	1	837	1435	0	839
Ca. Chlorobium antarcticum	Ga0132184_1004171	Aquatic microbial communities from different depth of meromictic Siders Pond, Falmouth, Massachusetts; Cast 3, 6m depth; RNA IDBA-UD	3300009861	Siders Ponds	Massachusetts, USA	98	7	774	1	767	1351	0	767
Ca. Chlorobium antarcticum	Ga0214206_10140641	Freshwater microbial communities from Trout Bog Lake, WI - 07JUL2009 epilimnion	3300021131	Trout Bog Lake	Wisconsin, USA	98	467	1505	1	1039	1797	0	1039
Ca. Chlorobium antarcticum	Ga0214174_1001886	Freshwater microbial communities from Trout Bog Lake, WI - 31JUL2007 epilimnion	3300021115	Trout Bog Lake	Wisconsin, USA	98	567	1505	1	939	1613	0	939
Ca. Chlorobium antarcticum	Ga0214228_10015001	Freshwater microbial communities from Trout Bog Lake, WI - 05NOV2007 hypolimnion	3300020708	Trout Bog Lake	Wisconsin, USA	98	732	1505	1	774	1341	0	774
Ca. Chlorobium antarcticum	Ga0302064_1065122	Marine microbial communities from Ace Lake, Antarctica - Site 232 with 0.8UM filter - spades	3300028221	Ace Lake	Antarctica	97	636	1505	86	954	1472	0	954
Ca. Chlorobium antarcticum	Ga0208507_10072524	Freshwater microbial communities from Crystal Bog, Wisconsin, USA - CBH12Aug09.1 (SPAdes)	3300025648	Crystal Bog	Wisconsin, USA	97	1	1504	1	1503	2488	0	1505
Ca. Chlorobium antarcticum	Ga0007877_10030452	Freshwater microbial communities from Crystal Bog, Wisconsin, USA - CBH12Jul09	3300003814	Crystal Bog	Wisconsin, USA	97	1	1504	1	1503	2516	0	1505
Ca. Chlorobium antarcticum	Ga0208495_10065402	Freshwater microbial communities from Crystal Bog, Wisconsin, USA - MA14M (SPAdes)	3300025476	Crystal Bog	Wisconsin, USA	97	1	1504	1	1503	2527	0	1505
Ca. Chlorobium antarcticum	Ga0007838_10001074	Freshwater microbial communities from Crystal Bog, Wisconsin, USA - CBE27Jun08	3300003805	Crystal Bog	Wisconsin, USA	97	1	1505	1	1504	2512	0	1504
Ca. Chlorobium antarcticum	Ga0007838_10000593	Freshwater microbial communities from Crystal Bog, Wisconsin, USA - CBE27Jun08	3300003805	Crystal Bog	Wisconsin, USA	97	1	1505	1	1504	2512	0	1504
Ca. Chlorobium antarcticum	Ga0208869_10010815	Freshwater microbial communities from Crystal Bog, Wisconsin, USA - CBE27Jun08 (SPAdes)	3300025779	Crystal Bog	Wisconsin, USA	97	1	1505	1	1504	2512	0	1504
Ca. Chlorobium antarcticum	Ga0208873_10016151	Freshwater microbial communities from Crystal Bog, Wisconsin, USA - CBH01Aug08 (SPAdes)	3300025788	Crystal Bog	Wisconsin, USA	97	1	1505	1	1504	2512	0	1504
Ca. Chlorobium antarcticum	Ga0208743_10028341	Freshwater microbial communities from Crystal Bog, Wisconsin, USA - CBH04Jul08 (SPAdes)	3300025390	Crystal Bog	Wisconsin, USA	97	1	1505	1	1504	2512	0	1504
Ca. Chlorobium antarcticum	Ga0208111_10041121	Freshwater microbial communities from Crystal Bog, Wisconsin, USA - CBH08Aug08 (SPAdes)	3300025420	Crystal Bog	Wisconsin, USA	97	1	1505	1	1504	2512	0	1504
Ca. Chlorobium antarcticum	Ga0208872_10092794	Freshwater microbial communities from Crystal Bog, Wisconsin, USA - CBH12Aug08 (SPAdes)	3300025838	Crystal Bog	Wisconsin, USA	97	1	1505	1	1504	2512	0	1504
Ca. Chlorobium antarcticum	Ga0208622_10025755	Freshwater microbial communities from Crystal Bog, Wisconsin, USA - CBH12Jul09 (SPAdes)	3300025430	Crystal Bog	Wisconsin, USA	97	1	1505	1	1504	2512	0	1504
Ca. Chlorobium antarcticum	Ga0208110_10001523	Freshwater microbial communities from Crystal Bog, Wisconsin, USA - CBH13Jun08 (SPAdes)	3300025777	Crystal Bog	Wisconsin, USA	97	1	1505	1	1504	2512	0	1504
Ca. Chlorobium antarcticum	Ga0208109_10016324	Freshwater microbial communities from Crystal Bog, Wisconsin, USA - CBH18Jul08 (SPAdes)	3300025395	Crystal Bog	Wisconsin, USA	97	1	1505	1	1504	2512	0	1504
Ca. Chlorobium antarcticum	Ga0007874_10004384	Freshwater microbial communities from Crystal Bog, Wisconsin, USA - CBH22May08	3300003824	Crystal Bog	Wisconsin, USA	97	1	1505	1	1504	2512	0	1504
Ca. Chlorobium antarcticum	Ga0208259_10006203	Freshwater microbial communities from Crystal Bog, Wisconsin, USA - CBH22May08 (SPAdes)	3300025375	Crystal Bog	Wisconsin, USA	97	1	1505	1	1504	2512	0	1504
Ca. Chlorobium antarcticum	Ga0208744_100024216	Freshwater microbial communities from Crystal Bog, Wisconsin, USA - CBH24Aug09 (SPAdes)	3300025450	Crystal Bog	Wisconsin, USA	97	1	1505	1	1504	2523	0	1504
Ca. Chlorobium antarcticum	Ga0208875_10017281	Freshwater microbial communities from Crystal Bog, Wisconsin, USA - CBH25Aug08 (SPAdes)	3300025410	Crystal Bog	Wisconsin, USA	97	1	1505	1	1504	2512	0	1504
Ca. Chlorobium antarcticum	Ga0007852_10009537	Freshwater microbial communities from Crystal Bog, Wisconsin, USA - CBH28Sep08	3300006123	Crystal Bog	Wisconsin, USA	97	1	1505	1	1504	2512	0	1504
Ca. Chlorobium antarcticum	Ga0208506_10005708	Freshwater microbial communities from Crystal Bog, Wisconsin, USA - CBH29Jul08 (SPAdes)	3300025428	Crystal Bog	Wisconsin, USA	97	1	1505	1	1504	2512	0	1504
Ca. Chlorobium antarcticum	Ga0007802_1002085	Freshwater microbial communities from Crystal Bog, Wisconsin, USA - MA4M	3300003811	Crystal Bog	Wisconsin, USA	97	1	1505	1	1504	2507	0	1504
Ca. Chlorobium antarcticum	Ga0208377_10008292	Freshwater microbial communities from Crystal Bog, Wisconsin, USA - MA4M (SPAdes)	3300025370	Crystal Bog	Wisconsin, USA	97	1	1505	1	1504	2507	0	1504
Ca. Chlorobium antarcticum	Ga0208248_10119392	Freshwater microbial communities from Crystal Bog, Wisconsin, USA - MA5M (SPAdes)	3300025595	Crystal Bog	Wisconsin, USA	97	1	1505	1	1504	2507	0	1504
Ca. Chlorobium antarcticum	Ga0208613_10021911	Freshwater microbial communities from Crystal Bog, Wisconsin, USA - MA6M (SPAdes)	3300025616	Crystal Bog	Wisconsin, USA	97	1	1505	1	1504	2507	0	1504
Ca. Chlorobium antarcticum	Ga0208103_10061083	Freshwater microbial communities from Crystal Bog, Wisconsin, USA - MA7.5M (SPAdes)	3300025436	Crystal Bog	Wisconsin, USA	97	15	1505	1	1490	2497	0	1490
Ca. Chlorobium antarcticum	Ga0007849_10002574	Freshwater microbial communities from Crystal Bog, Wisconsin, USA - CBH13Jun08	3300003803	Crystal Bog	Wisconsin, USA	97	89	1505	1	1416	2372	0	1416
Ca. Chlorobium antarcticum	Ga0208494_10137331	Freshwater microbial communities from Crystal Bog, Wisconsin, USA - MA10M (SPAdes)	3300025376	Crystal Bog	Wisconsin, USA	97	201	1118	1	917	1522	0	919
Ca. Chlorobium antarcticum	Ga0007793_1043961	Freshwater microbial communities from Crystal Bog, Wisconsin, USA - MA10M	3300003825	Crystal Bog	Wisconsin, USA	97	220	1114	2	896	1500	0	896
Ca. Chlorobium antarcticum	Ga0208387_10237762	Freshwater microbial communities from Crystal Bog, Wisconsin, USA - CBH27Jul09 (SPAdes)	3300025400	Crystal Bog	Wisconsin, USA	97	1	878	1	877	1471	0	877
Ca. Chlorobium antarcticum	Ga0007853_10053631	Freshwater microbial communities from Crystal Bog, Wisconsin, USA - CBH11Jul08	3300003795	Crystal Bog	Wisconsin, USA	97	639	1504	1	866	1474	0	866
Ca. Chlorobium antarcticum	Ga0007860_10065471	Freshwater microbial communities from Crystal Bog, Wisconsin, USA - CBH15Jul08	3300003800	Crystal Bog	Wisconsin, USA	97	639	1504	1	866	1474	0	866
Ca. Chlorobium antarcticum	Ga0007865_10118971	Freshwater microbial communities from Crystal Bog, Wisconsin, USA - CBH27Jul09	3300003796	Crystal Bog	Wisconsin, USA	97	639	1504	1	866	1478	0	866
Ca. Chlorobium antarcticum	Ga0007872_10109841	Freshwater microbial communities from Crystal Bog, Wisconsin, USA - CBH29Jul08	3300003826	Crystal Bog	Wisconsin, USA	97	639	1504	1	866	1474	0	866
Ca. Chlorobium antarcticum	Ga0007794_100692941	Freshwater microbial communities from Crystal Bog, Wisconsin, USA - MA5M	3300004774	Crystal Bog	Wisconsin, USA	97	1	842	1	841	1410	0	841
Ca. Chlorobium antarcticum	Ga0208620_10102242	Freshwater microbial communities from Crystal Bog, Wisconsin, USA - CBH24Jun08 (SPAdes)	3300025368	Crystal Bog	Wisconsin, USA	97	1	836	1	835	1387	0	835
Ca. Chlorobium antarcticum	Ga0208260_10018518	Freshwater microbial communities from Crystal Bog, Wisconsin, USA - CBH18Aug09 (SPAdes)	3300025467	Crystal Bog	Wisconsin, USA	97	717	1504	1	788	1339	0	790
Ca. Chlorobium antarcticum	Ga0208387_10013811	Freshwater microbial communities from Crystal Bog, Wisconsin, USA - CBH27Jul09 (SPAdes)	3300025400	Crystal Bog	Wisconsin, USA	97	717	1505	1	789	1341	0	789
Ca. Chlorobium antarcticum	Ga0194037_10068685	Anoxic zone freshwater microbial communities from boreal shield lake in IISD Experimental Lakes Area, Ontario, Canada - Jun2016-L304-6m	3300020164	Experimental Lakes Area	Canada	97	1	1504	1	1503	2505	0	1505
Ca. Chlorobium antarcticum	Ga0194037_10208754	Anoxic zone freshwater microbial communities from boreal shield lake in IISD Experimental Lakes Area, Ontario, Canada - Jun2016-L304-6m	3300020164	Experimental Lakes Area	Canada	97	1	1504	1	1503	2488	0	1505
Ca. Chlorobium antarcticum	Ga0194060_100148004	Anoxic zone freshwater microbial communities from boreal shield lake in IISD Experimental Lakes Area, Ontario, Canada - Sep2016-L222-5m	3300021602	Experimental Lakes Area	Canada	97	1	1505	1	1504	2518	0	1504
Ca. Chlorobium antarcticum	Ga0194053_100246633	Anoxic zone freshwater microbial communities from boreal shield lake in IISD Experimental Lakes Area, Ontario, Canada - Sep2016-L227-8m	3300021520	Experimental Lakes Area	Canada	97	1	1505	1	1504	2495	0	1504
Ca. Chlorobium antarcticum	Ga0194063_100430191	Anoxic zone freshwater microbial communities from boreal shield lake in IISD Experimental Lakes Area, Ontario, Canada - Sep2016-L373-20m	3300021075	Experimental Lakes Area	Canada	97	1	1505	1	1504	2512	0	1504
Ca. Chlorobium antarcticum	Ga0194056_100053211	Anoxic zone freshwater microbial communities from boreal shield lake in IISD Experimental Lakes Area, Ontario, Canada - Sep2016-L442-13m	3300021070	Experimental Lakes Area	Canada	97	1	1505	1	1504	2512	0	1504
Ca. Chlorobium antarcticum	Ga0194057_100497721	Anoxic zone freshwater microbial communities from boreal shield lake in IISD Experimental Lakes Area, Ontario, Canada - Sep2016-L442-15m	3300021072	Experimental Lakes Area	Canada	97	299	1505	1	1207	2036	0	1207
Ca. Chlorobium antarcticum	Ga0194052_10814271	Anoxic zone freshwater microbial communities from boreal shield lake in IISD Experimental Lakes Area, Ontario, Canada - Sep2016-L227-6m	3300021349	Experimental Lakes Area	Canada	97	329	1504	1	1176	1995	0	1178
Ca. Chlorobium antarcticum	Ga0194058_100073581	Anoxic zone freshwater microbial communities from boreal shield lake in IISD Experimental Lakes Area, Ontario, Canada - Sep2016-L442-17m	3300021071	Experimental Lakes Area	Canada	97	416	1505	1	1090	1814	0	1090
Ca. Chlorobium antarcticum	Ga0194038_10412733	Anoxic zone freshwater microbial communities from boreal shield lake in IISD Experimental Lakes Area, Ontario, Canada - Jun2016-L227-6m	3300020158	Experimental Lakes Area	Canada	97	456	1504	1	1049	1760	0	1051
Ca. Chlorobium antarcticum	Ga0194044_101862441	Anoxic zone freshwater microbial communities from boreal shield lake in IISD Experimental Lakes Area, Ontario, Canada - Jun2016-L442-17m	3300021074	Experimental Lakes Area	Canada	97	635	1446	1	812	1351	0	812
Ca. Chlorobium antarcticum	Ga0172376_101624081	Freshwater microbial communities from Kabuno Bay, South-Kivu, Congo - kab_092012_35m	3300014720	Kabuno Bay	Congo	97	91	1505	1	1414	2357	0	1414
Ca. Chlorobium antarcticum	Ga0172374_10934451	Freshwater microbial communities from Kabuno Bay, South-Kivu, Congo - kab_092012_10.3m	3300013122	Kabuno Bay	Congo	97	91	1247	1	1156	1936	0	1156
Ca. Chlorobium antarcticum	Ga0172373_102540711	Freshwater microbial communities from Kabuno Bay, South-Kivu, Congo - kab_092012_10m	3300013131	Kabuno Bay	Congo	97	91	1247	1	1156	1936	0	1156
Ca. Chlorobium antarcticum	Ga0172372_102949771	Freshwater microbial communities from Kabuno Bay, South-Kivu, Congo - kab_092012_9.5m	3300013132	Kabuno Bay	Congo	97	91	1247	1	1156	1953	0	1156
Ca. Chlorobium antarcticum	Ga0209373_100538614	Freshwater pond sediment microbial communities from the University of Edinburgh, under environmental carbon perturbations - High cellulose week 5 (SPAdes)	3300027796	Lab Microcosm	Edinburgh, UK	97	610	1505	1	896	1483	0	896
Ca. Chlorobium antarcticum	Ga0168062_1041742	Synthetic microbial communities for library methods comparison from University of Liverpool, United Kingdom - Mg47	3300029205	Lab-generated synthetic community	Liverpool, UK	97	1	1504	1	1504	2507	0	1506
Ca. Chlorobium antarcticum	Ga0169450_1021099	Synthetic microbial communities for library methods comparison from University of Liverpool, United Kingdom - Mg70	3300014786	Lab-generated synthetic community	Liverpool, UK	97	1	1372	1	1372	2279	0	1372
Ca. Chlorobium antarcticum	Ga0247840_100326211	Freshwater microbial communities from meromictic Lake La Cruz, Castile-La Mancha, Spain - LaCruzMarch2015_17m	3300028581	Lake La Cruz	Spain	97	516	1504	1	989	1677	0	991
Ca. Chlorobium antarcticum	Ga0228698_10019355	Freshwater microbial communities from McNutts Creek, Athens, Georgia, United States - 1-17_Aug_MG	3300022745	McNutts Creek	Georgia, USA	97	1	1505	1	1504	2534	0	1504
Ca. Chlorobium antarcticum	Ga0105093_100081841	Freshwater sediment microbial communities from Prairie Pothole Lake near Jamestown, North Dakota, USA - PPLs Lake P8 Core (3) Depth 1-3cm March2015	3300009037	Prairie Pothole Lake	North Dakota, USA	97	466	1505	1	1040	1766	0	1040
Ca. Chlorobium antarcticum	Ga0209287_100068734	Freshwater sediment microbial communities from Prairie Pothole Lake near Jamestown, North Dakota, USA - PPLs Lake P8 Core (1) Depth 1-3cm May2015 (SPAdes)	3300027792	Prairie Pothole Lake	North Dakota, USA	97	610	1505	1	896	1506	0	896
Ca. Chlorobium antarcticum	Ga0210092_10178021	Wetland microbial communities from the San Francisco Bay, California, USA, that impact long-term carbon sequestration - WestPond_TuleB_D2 (SPAdes)	3300025978	San Francisco Bay	California, USA	97	617	1504	1	888	1513	0	890
Ca. Chlorobium antarcticum	Ga0164294_100948241	Oligotrophic lake water microbial communities from Sparkling Lake, Wisconsin, USA - GEODES005 metaG	3300013006	Sparkling Lake	Wisconsin, USA	97	270	1505	1	1236	2050	0	1236
Ca. Chlorobium antarcticum	Ga0364873_114371	Enriched cells from Trout Bog Lake Hypolimnion, Wisconsin, USA - BchlTB.Aug07.5000.01.D3	3300032886	Trout Bog Lake	Wisconsin, USA	97	1	1504	1	1503	2494	0	1505
Ca. Chlorobium antarcticum	Ga0364874_118971	Enriched cells from Trout Bog Lake Hypolimnion, Wisconsin, USA - BchlTB.Aug07.5000.01.D4	3300032837	Trout Bog Lake	Wisconsin, USA	97	1	1504	1	1503	2494	0	1505
Ca. Chlorobium antarcticum	Ga0364866_109462	Enriched cells from Trout Bog Lake Hypolimnion, Wisconsin, USA - BchlTB.Aug13.5000.01.D3	3300032991	Trout Bog Lake	Wisconsin, USA	97	1	1504	1	1503	2494	0	1505
Ca. Chlorobium antarcticum	Ga0364867_10002196	Enriched cells from Trout Bog Lake Hypolimnion, Wisconsin, USA - BchlTB.Aug13.5000.01.D4	3300032851	Trout Bog Lake	Wisconsin, USA	97	1	1504	1	1503	2494	0	1505
Ca. Chlorobium antarcticum	Ga0364859_100042	Enriched cells from Trout Bog Lake Hypolimnion, Wisconsin, USA - BchlTB.Aug20.5000.01 .D3	3300032989	Trout Bog Lake	Wisconsin, USA	97	1	1504	1	1503	2494	0	1505
Ca. Chlorobium antarcticum	Ga0364907_102562	Enriched cells from Trout Bog Lake Hypolimnion, Wisconsin, USA - BchlTB.July02.5000.02.D3	3300032808	Trout Bog Lake	Wisconsin, USA	97	1	1504	1	1503	2494	0	1505
Ca. Chlorobium antarcticum	Ga0364886_103432	Enriched cells from Trout Bog Lake Hypolimnion, Wisconsin, USA - BchlTB.July23.5000.01.D3	3300032776	Trout Bog Lake	Wisconsin, USA	97	1	1504	1	1503	2494	0	1505
Ca. Chlorobium antarcticum	Ga0364887_102062	Enriched cells from Trout Bog Lake Hypolimnion, Wisconsin, USA - BchlTB.July23.5000.01.D4	3300032963	Trout Bog Lake	Wisconsin, USA	97	1	1504	1	1503	2494	0	1505
Ca. Chlorobium antarcticum	Ga0364880_100082	Enriched cells from Trout Bog Lake Hypolimnion, Wisconsin, USA - BchlTB.July30.5000.01.D3	3300032857	Trout Bog Lake	Wisconsin, USA	97	1	1504	1	1503	2494	0	1505
Ca. Chlorobium antarcticum	Ga0364881_10002195	Enriched cells from Trout Bog Lake Hypolimnion, Wisconsin, USA - BchlTB.July30.5000.01.D4	3300032962	Trout Bog Lake	Wisconsin, USA	97	1	1504	1	1503	2494	0	1505
Ca. Chlorobium antarcticum	Ga0214199_10007787	Freshwater microbial communities from Trout Bog Lake, WI - 04OCT2008 epilimnion	3300021124	Trout Bog Lake	Wisconsin, USA	97	1	1504	1	1503	2488	0	1505
Ca. Chlorobium antarcticum	Ga0214192_10002205	Freshwater microbial communities from Trout Bog Lake, WI - 29JUL2008 epilimnion	3300021142	Trout Bog Lake	Wisconsin, USA	97	1	1504	1	1503	2494	0	1505
Ca. Chlorobium antarcticum	Ga0316217_100050779	Freshwater microbial communities from Trout Bog Lake, Wisconsin, USA - 1anoA	3300031813	Trout Bog Lake	Wisconsin, USA	97	1	1504	1	1503	2494	0	1505
Ca. Chlorobium antarcticum	Ga0316217_100050772	Freshwater microbial communities from Trout Bog Lake, Wisconsin, USA - 1anoA	3300031813	Trout Bog Lake	Wisconsin, USA	97	1	1504	1	1503	2494	0	1505
Ca. Chlorobium antarcticum	Ga0316218_10120111	Freshwater microbial communities from Trout Bog Lake, Wisconsin, USA - TBH18003	3300032117	Trout Bog Lake	Wisconsin, USA	97	1	1504	1	1503	2494	0	1505
Ca. Chlorobium antarcticum	Ga0316219_10118181	Freshwater microbial communities from Trout Bog Lake, Wisconsin, USA - TBH18003P	3300031759	Trout Bog Lake	Wisconsin, USA	97	1	1504	1	1503	2494	0	1505
Ca. Chlorobium antarcticum	Ga0316220_10120904	Freshwater microbial communities from Trout Bog Lake, Wisconsin, USA - TBH18005	3300031884	Trout Bog Lake	Wisconsin, USA	97	1	1504	1	1503	2494	0	1505
Ca. Chlorobium antarcticum	Ga0316221_10120994	Freshwater microbial communities from Trout Bog Lake, Wisconsin, USA - TBH18007	3300032665	Trout Bog Lake	Wisconsin, USA	97	1	1504	1	1503	2494	0	1505
Ca. Chlorobium antarcticum	Ga0316223_10114554	Freshwater microbial communities from Trout Bog Lake, Wisconsin, USA - TBH18009	3300032560	Trout Bog Lake	Wisconsin, USA	97	1	1504	1	1503	2494	0	1505
Ca. Chlorobium antarcticum	Ga0316222_10149141	Freshwater microbial communities from Trout Bog Lake, Wisconsin, USA - TBH18011	3300032561	Trout Bog Lake	Wisconsin, USA	97	1	1504	1	1503	2494	0	1505
Ca. Chlorobium antarcticum	Ga0316224_10118991	Freshwater microbial communities from Trout Bog Lake, Wisconsin, USA - TBH18013	3300032753	Trout Bog Lake	Wisconsin, USA	97	1	1504	1	1503	2494	0	1505
Ca. Chlorobium antarcticum	Ga0316225_10110724	Freshwater microbial communities from Trout Bog Lake, Wisconsin, USA - TBH18015	3300032675	Trout Bog Lake	Wisconsin, USA	97	1	1504	1	1503	2494	0	1505
Ca. Chlorobium antarcticum	Ga0316227_10119084	Freshwater microbial communities from Trout Bog Lake, Wisconsin, USA - TBH18019	3300032677	Trout Bog Lake	Wisconsin, USA	97	1	1504	1	1503	2527	0	1505
Ca. Chlorobium antarcticum	Ga0316228_10115924	Freshwater microbial communities from Trout Bog Lake, Wisconsin, USA - TBH18021	3300032579	Trout Bog Lake	Wisconsin, USA	97	1	1504	1	1503	2494	0	1505
Ca. Chlorobium antarcticum	Ga0316229_10123861	Freshwater microbial communities from Trout Bog Lake, Wisconsin, USA - TBH18023	3300032676	Trout Bog Lake	Wisconsin, USA	97	1	1504	1	1503	2494	0	1505
Ca. Chlorobium antarcticum	Ga0316230_10111541	Freshwater microbial communities from Trout Bog Lake, Wisconsin, USA - TBH18025	3300032668	Trout Bog Lake	Wisconsin, USA	97	1	1504	1	1503	2494	0	1505
Ca. Chlorobium antarcticum	Ga0316232_10148314	Freshwater microbial communities from Trout Bog Lake, Wisconsin, USA - TBH18025_13	3300032605	Trout Bog Lake	Wisconsin, USA	97	1	1504	1	1503	2494	0	1505
Ca. Chlorobium antarcticum	Ga0316231_10145081	Freshwater microbial communities from Trout Bog Lake, Wisconsin, USA - TBH18027	3300032722	Trout Bog Lake	Wisconsin, USA	97	1	1504	1	1503	2494	0	1505
Ca. Chlorobium antarcticum	Ga0364908_107201	Enriched cells from Trout Bog Lake Hypolimnion, Wisconsin, USA - BchlTB.July02.5000.02.D4	3300033000	Trout Bog Lake	Wisconsin, USA	97	1	1505	1	1504	2523	0	1504
Ca. Chlorobium antarcticum	Ga0364900_106143	Enriched cells from Trout Bog Lake Hypolimnion, Wisconsin, USA - BchlTB.July09.5000.02.D3	3300032882	Trout Bog Lake	Wisconsin, USA	97	1	1505	1	1504	2512	0	1504
Ca. Chlorobium antarcticum	Ga0364901_107562	Enriched cells from Trout Bog Lake Hypolimnion, Wisconsin, USA - BchlTB.July09.5000.02.D4	3300032880	Trout Bog Lake	Wisconsin, USA	97	1	1505	1	1504	2512	0	1504
Ca. Chlorobium antarcticum	Ga0364894_108072	Enriched cells from Trout Bog Lake Hypolimnion, Wisconsin, USA - BchlTB.July16.5000.01.D4	3300032885	Trout Bog Lake	Wisconsin, USA	97	1	1505	1	1504	2495	0	1504
Ca. Chlorobium antarcticum	Ga0364918_104141	Enriched cells from Trout Bog Lake Hypolimnion, Wisconsin, USA - BchlTB.June20.5000.01.C6	3300032965	Trout Bog Lake	Wisconsin, USA	97	1	1505	1	1504	2512	0	1504
Ca. Chlorobium antarcticum	Ga0364914_106844	Enriched cells from Trout Bog Lake Hypolimnion, Wisconsin, USA - BchlTB.June25.5000.01.D3	3300032868	Trout Bog Lake	Wisconsin, USA	97	1	1505	1	1504	2507	0	1504
Ca. Chlorobium antarcticum	Ga0248169_1154782	Freshwater microbial communities from Trout Bog Lake, Vilas County, Wisconsin, United States - 30JULY2014 epilimnion	3300022602	Trout Bog Lake	Wisconsin, USA	97	1	1505	1	1504	2512	0	1504
Ca. Chlorobium antarcticum	Ga0214188_1012625	Freshwater microbial communities from Trout Bog Lake, WI - 01JUL2008 epilimnion	3300021120	Trout Bog Lake	Wisconsin, USA	97	1	1505	1	1504	2512	0	1504
Ca. Chlorobium antarcticum	Ga0214233_10000012	Freshwater microbial communities from Trout Bog Lake, WI - 01JUL2008 hypolimnion	3300020709	Trout Bog Lake	Wisconsin, USA	97	1	1505	1	1504	2512	0	1504
Ca. Chlorobium antarcticum	Ga0214233_10000019	Freshwater microbial communities from Trout Bog Lake, WI - 01JUL2008 hypolimnion	3300020709	Trout Bog Lake	Wisconsin, USA	97	1	1505	1	1504	2512	0	1504
Ca. Chlorobium antarcticum	Ga0214226_1000001418	Freshwater microbial communities from Trout Bog Lake, WI - 01OCT2007 hypolimnion	3300020693	Trout Bog Lake	Wisconsin, USA	97	1	1505	1	1504	2512	0	1504
Ca. Chlorobium antarcticum	Ga0214217_10009415	Freshwater microbial communities from Trout Bog Lake, WI - 02JUL2007 hypolimnion	3300020706	Trout Bog Lake	Wisconsin, USA	97	1	1505	1	1504	2512	0	1504
Ca. Chlorobium antarcticum	Ga0214210_10004258	Freshwater microbial communities from Trout Bog Lake, WI - 03AUG2009 epilimnion	3300020689	Trout Bog Lake	Wisconsin, USA	97	1	1505	1	1504	2512	0	1504
Ca. Chlorobium antarcticum	Ga0214255_10010502	Freshwater microbial communities from Trout Bog Lake, WI - 03AUG2009 hypolimnion	3300020712	Trout Bog Lake	Wisconsin, USA	97	1	1505	1	1504	2512	0	1504
Ca. Chlorobium antarcticum	Ga0214247_10028855	Freshwater microbial communities from Trout Bog Lake, WI - 03JUN2009 hypolimnion	3300021135	Trout Bog Lake	Wisconsin, USA	97	1	1505	1	1504	2512	0	1504
Ca. Chlorobium antarcticum	Ga0214244_10000031	Freshwater microbial communities from Trout Bog Lake, WI - 04OCT2008 hypolimnion	3300020724	Trout Bog Lake	Wisconsin, USA	97	1	1505	1	1504	2512	0	1504
Ca. Chlorobium antarcticum	Ga0214244_10000038	Freshwater microbial communities from Trout Bog Lake, WI - 04OCT2008 hypolimnion	3300020724	Trout Bog Lake	Wisconsin, USA	97	1	1505	1	1504	2512	0	1504
Ca. Chlorobium antarcticum	Ga0214238_10000502	Freshwater microbial communities from Trout Bog Lake, WI - 05AUG2008 hypolimnion	3300020707	Trout Bog Lake	Wisconsin, USA	97	1	1505	1	1504	2512	0	1504
Ca. Chlorobium antarcticum	Ga0214238_10000509	Freshwater microbial communities from Trout Bog Lake, WI - 05AUG2008 hypolimnion	3300020707	Trout Bog Lake	Wisconsin, USA	97	1	1505	1	1504	2512	0	1504
Ca. Chlorobium antarcticum	Ga0214251_1000001381	Freshwater microbial communities from Trout Bog Lake, WI - 07JUL2009 hypolimnion	3300020729	Trout Bog Lake	Wisconsin, USA	97	1	1505	1	1504	2512	0	1504
Ca. Chlorobium antarcticum	Ga0214251_1000001388	Freshwater microbial communities from Trout Bog Lake, WI - 07JUL2009 hypolimnion	3300020729	Trout Bog Lake	Wisconsin, USA	97	1	1505	1	1504	2512	0	1504
Ca. Chlorobium antarcticum	Ga0214214_1006595	Freshwater microbial communities from Trout Bog Lake, WI - 07JUN2007 hypolimnion	3300020684	Trout Bog Lake	Wisconsin, USA	97	1	1505	1	1504	2512	0	1504
Ca. Chlorobium antarcticum	Ga0214234_1007625	Freshwater microbial communities from Trout Bog Lake, WI - 08JUL2008 hypolimnion	3300020683	Trout Bog Lake	Wisconsin, USA	97	1	1505	1	1504	2512	0	1504
Ca. Chlorobium antarcticum	Ga0214175_10013275	Freshwater microbial communities from Trout Bog Lake, WI - 09AUG2007 epilimnion	3300021133	Trout Bog Lake	Wisconsin, USA	97	1	1505	1	1504	2512	0	1504
Ca. Chlorobium antarcticum	Ga0214221_10007542	Freshwater microbial communities from Trout Bog Lake, WI - 09AUG2007 hypolimnion	3300020699	Trout Bog Lake	Wisconsin, USA	97	1	1505	1	1504	2512	0	1504
Ca. Chlorobium antarcticum	Ga0214197_10008111	Freshwater microbial communities from Trout Bog Lake, WI - 09SEP2008 epilimnion	3300020694	Trout Bog Lake	Wisconsin, USA	97	1	1505	1	1504	2512	0	1504
Ca. Chlorobium antarcticum	Ga0214242_1000005148	Freshwater microbial communities from Trout Bog Lake, WI - 09SEP2008 hypolimnion	3300020701	Trout Bog Lake	Wisconsin, USA	97	1	1505	1	1504	2512	0	1504
Ca. Chlorobium antarcticum	Ga0214242_1000005141	Freshwater microbial communities from Trout Bog Lake, WI - 09SEP2008 hypolimnion	3300020701	Trout Bog Lake	Wisconsin, USA	97	1	1505	1	1504	2512	0	1504
Ca. Chlorobium antarcticum	Ga0214224_10007051	Freshwater microbial communities from Trout Bog Lake, WI - 10SEP2007 hypolimnion	3300020692	Trout Bog Lake	Wisconsin, USA	97	1	1505	1	1504	2512	0	1504
Ca. Chlorobium antarcticum	Ga0214211_10007505	Freshwater microbial communities from Trout Bog Lake, WI - 11AUG2009 epilimnion	3300021125	Trout Bog Lake	Wisconsin, USA	97	1	1505	1	1504	2512	0	1504
Ca. Chlorobium antarcticum	Ga0214256_1000022	Freshwater microbial communities from Trout Bog Lake, WI - 11AUG2009 hypolimnion	3300020685	Trout Bog Lake	Wisconsin, USA	97	1	1505	1	1504	2512	0	1504
Ca. Chlorobium antarcticum	Ga0214256_1000029	Freshwater microbial communities from Trout Bog Lake, WI - 11AUG2009 hypolimnion	3300020685	Trout Bog Lake	Wisconsin, USA	97	1	1505	1	1504	2512	0	1504
Ca. Chlorobium antarcticum	Ga0214194_1005092	Freshwater microbial communities from Trout Bog Lake, WI - 12AUG2008 epilimnion	3300020686	Trout Bog Lake	Wisconsin, USA	97	1	1505	1	1504	2512	0	1504
Ca. Chlorobium antarcticum	Ga0214239_1000012	Freshwater microbial communities from Trout Bog Lake, WI - 12AUG2008 hypolimnion	3300020688	Trout Bog Lake	Wisconsin, USA	97	1	1505	1	1504	2512	0	1504
Ca. Chlorobium antarcticum	Ga0214239_1000019	Freshwater microbial communities from Trout Bog Lake, WI - 12AUG2008 hypolimnion	3300020688	Trout Bog Lake	Wisconsin, USA	97	1	1505	1	1504	2512	0	1504
Ca. Chlorobium antarcticum	Ga0214172_10021305	Freshwater microbial communities from Trout Bog Lake, WI - 12JUL2007 epilimnion	3300020733	Trout Bog Lake	Wisconsin, USA	97	1	1505	1	1504	2512	0	1504
Ca. Chlorobium antarcticum	Ga0214218_10009125	Freshwater microbial communities from Trout Bog Lake, WI - 12JUL2007 hypolimnion	3300020702	Trout Bog Lake	Wisconsin, USA	97	1	1505	1	1504	2512	0	1504
Ca. Chlorobium antarcticum	Ga0214231_1000202	Freshwater microbial communities from Trout Bog Lake, WI - 12MAY2008 hypolimnion	3300020687	Trout Bog Lake	Wisconsin, USA	97	1	1505	1	1504	2512	0	1504
Ca. Chlorobium antarcticum	Ga0214231_1000209	Freshwater microbial communities from Trout Bog Lake, WI - 12MAY2008 hypolimnion	3300020687	Trout Bog Lake	Wisconsin, USA	97	1	1505	1	1504	2512	0	1504
Ca. Chlorobium antarcticum	Ga0214207_10023724	Freshwater microbial communities from Trout Bog Lake, WI - 13JUL2009 epilimnion	3300020716	Trout Bog Lake	Wisconsin, USA	97	1	1505	1	1504	2512	0	1504
Ca. Chlorobium antarcticum	Ga0214252_10017515	Freshwater microbial communities from Trout Bog Lake, WI - 13JUL2009 hypolimnion	3300020720	Trout Bog Lake	Wisconsin, USA	97	1	1505	1	1504	2512	0	1504
Ca. Chlorobium antarcticum	Ga0214186_1000872	Freshwater microbial communities from Trout Bog Lake, WI - 13JUN2008 epilimnion	3300021112	Trout Bog Lake	Wisconsin, USA	97	1	1505	1	1504	2512	0	1504
Ca. Chlorobium antarcticum	Ga0214232_1003645	Freshwater microbial communities from Trout Bog Lake, WI - 13JUN2008 hypolimnion	3300020679	Trout Bog Lake	Wisconsin, USA	97	1	1505	1	1504	2512	0	1504
Ca. Chlorobium antarcticum	Ga0214190_1000003208	Freshwater microbial communities from Trout Bog Lake, WI - 15JUL2008 epilimnion	3300020695	Trout Bog Lake	Wisconsin, USA	97	1	1505	1	1504	2512	0	1504
Ca. Chlorobium antarcticum	Ga0214190_1000003215	Freshwater microbial communities from Trout Bog Lake, WI - 15JUL2008 epilimnion	3300020695	Trout Bog Lake	Wisconsin, USA	97	1	1505	1	1504	2512	0	1504
Ca. Chlorobium antarcticum	Ga0214235_10000019	Freshwater microbial communities from Trout Bog Lake, WI - 15JUL2008 hypolimnion	3300020734	Trout Bog Lake	Wisconsin, USA	97	1	1505	1	1504	2512	0	1504
Ca. Chlorobium antarcticum	Ga0214235_10000012	Freshwater microbial communities from Trout Bog Lake, WI - 15JUL2008 hypolimnion	3300020734	Trout Bog Lake	Wisconsin, USA	97	1	1505	1	1504	2512	0	1504
Ca. Chlorobium antarcticum	Ga0214248_10014975	Freshwater microbial communities from Trout Bog Lake, WI - 15JUN2009 hypolimnion	3300020717	Trout Bog Lake	Wisconsin, USA	97	1	1505	1	1504	2512	0	1504
Ca. Chlorobium antarcticum	Ga0214180_10017265	Freshwater microbial communities from Trout Bog Lake, WI - 16OCT2007 epilimnion	3300021130	Trout Bog Lake	Wisconsin, USA	97	1	1505	1	1504	2512	0	1504
Ca. Chlorobium antarcticum	Ga0214227_100019817	Freshwater microbial communities from Trout Bog Lake, WI - 16OCT2007 hypolimnion	3300020703	Trout Bog Lake	Wisconsin, USA	97	1	1505	1	1504	2512	0	1504
Ca. Chlorobium antarcticum	Ga0214178_10014405	Freshwater microbial communities from Trout Bog Lake, WI - 17SEP2007 epilimnion	3300020718	Trout Bog Lake	Wisconsin, USA	97	1	1505	1	1504	2512	0	1504
Ca. Chlorobium antarcticum	Ga0214225_10009452	Freshwater microbial communities from Trout Bog Lake, WI - 17SEP2007 hypolimnion	3300020700	Trout Bog Lake	Wisconsin, USA	97	1	1505	1	1504	2512	0	1504
Ca. Chlorobium antarcticum	Ga0214212_10007315	Freshwater microbial communities from Trout Bog Lake, WI - 18AUG2009 epilimnion	3300021123	Trout Bog Lake	Wisconsin, USA	97	1	1505	1	1504	2512	0	1504
Ca. Chlorobium antarcticum	Ga0214257_10013245	Freshwater microbial communities from Trout Bog Lake, WI - 18AUG2009 hypolimnion	3300020719	Trout Bog Lake	Wisconsin, USA	97	1	1505	1	1504	2512	0	1504
Ca. Chlorobium antarcticum	Ga0214195_10008491	Freshwater microbial communities from Trout Bog Lake, WI - 19AUG2008 epilimnion	3300021122	Trout Bog Lake	Wisconsin, USA	97	1	1505	1	1504	2512	0	1504
Ca. Chlorobium antarcticum	Ga0214240_1001854	Freshwater microbial communities from Trout Bog Lake, WI - 19AUG2008 hypolimnion	3300020691	Trout Bog Lake	Wisconsin, USA	97	1	1505	1	1504	2512	0	1504
Ca. Chlorobium antarcticum	Ga0214240_10018511	Freshwater microbial communities from Trout Bog Lake, WI - 19AUG2008 hypolimnion	3300020691	Trout Bog Lake	Wisconsin, USA	97	1	1505	1	1504	2512	0	1504
Ca. Chlorobium antarcticum	Ga0214176_10007712	Freshwater microbial communities from Trout Bog Lake, WI - 20AUG2007 epilimnion	3300021128	Trout Bog Lake	Wisconsin, USA	97	1	1505	1	1504	2512	0	1504
Ca. Chlorobium antarcticum	Ga0214222_10011255	Freshwater microbial communities from Trout Bog Lake, WI - 20AUG2007 hypolimnion	3300020713	Trout Bog Lake	Wisconsin, USA	97	1	1505	1	1504	2512	0	1504
Ca. Chlorobium antarcticum	Ga0214198_10000015	Freshwater microbial communities from Trout Bog Lake, WI - 20SEP2008 epilimnion	3300020710	Trout Bog Lake	Wisconsin, USA	97	1	1505	1	1504	2512	0	1504
Ca. Chlorobium antarcticum	Ga0214198_100000113	Freshwater microbial communities from Trout Bog Lake, WI - 20SEP2008 epilimnion	3300020710	Trout Bog Lake	Wisconsin, USA	97	1	1505	1	1504	2512	0	1504
Ca. Chlorobium antarcticum	Ga0214243_1003212	Freshwater microbial communities from Trout Bog Lake, WI - 20SEP2008 hypolimnion	3300021116	Trout Bog Lake	Wisconsin, USA	97	1	1505	1	1504	2512	0	1504
Ca. Chlorobium antarcticum	Ga0214208_10019341	Freshwater microbial communities from Trout Bog Lake, WI - 21JUL2009 epilimnion	3300021117	Trout Bog Lake	Wisconsin, USA	97	1	1505	1	1504	2512	0	1504
Ca. Chlorobium antarcticum	Ga0214253_1008435	Freshwater microbial communities from Trout Bog Lake, WI - 21JUL2009 hypolimnion	3300020681	Trout Bog Lake	Wisconsin, USA	97	1	1505	1	1504	2512	0	1504
Ca. Chlorobium antarcticum	Ga0214230_1004434	Freshwater microbial communities from Trout Bog Lake, WI - 22MAY2008 hypolimnion	3300020697	Trout Bog Lake	Wisconsin, USA	97	1	1505	1	1504	2512	0	1504
Ca. Chlorobium antarcticum	Ga0214249_1000001388	Freshwater microbial communities from Trout Bog Lake, WI - 23JUN2009 hypolimnion	3300020723	Trout Bog Lake	Wisconsin, USA	97	1	1505	1	1504	2512	0	1504
Ca. Chlorobium antarcticum	Ga0214249_1000001381	Freshwater microbial communities from Trout Bog Lake, WI - 23JUN2009 hypolimnion	3300020723	Trout Bog Lake	Wisconsin, USA	97	1	1505	1	1504	2512	0	1504
Ca. Chlorobium antarcticum	Ga0214245_10000039	Freshwater microbial communities from Trout Bog Lake, WI - 23OCT2008 hypolimnion	3300020722	Trout Bog Lake	Wisconsin, USA	97	1	1505	1	1504	2512	0	1504
Ca. Chlorobium antarcticum	Ga0214245_10000032	Freshwater microbial communities from Trout Bog Lake, WI - 23OCT2008 hypolimnion	3300020722	Trout Bog Lake	Wisconsin, USA	97	1	1505	1	1504	2512	0	1504
Ca. Chlorobium antarcticum	Ga0214187_10011695	Freshwater microbial communities from Trout Bog Lake, WI - 24JUN2008 epilimnion	3300021126	Trout Bog Lake	Wisconsin, USA	97	1	1505	1	1504	2512	0	1504
Ca. Chlorobium antarcticum	Ga0214196_10015051	Freshwater microbial communities from Trout Bog Lake, WI - 25AUG2008 epilimnion	3300021132	Trout Bog Lake	Wisconsin, USA	97	1	1505	1	1504	2512	0	1504
Ca. Chlorobium antarcticum	Ga0214241_10011135	Freshwater microbial communities from Trout Bog Lake, WI - 25AUG2008 hypolimnion	3300020698	Trout Bog Lake	Wisconsin, USA	97	1	1505	1	1504	2512	0	1504
Ca. Chlorobium antarcticum	Ga0214173_1005525	Freshwater microbial communities from Trout Bog Lake, WI - 25JUL2007 epilimnion	3300021121	Trout Bog Lake	Wisconsin, USA	97	1	1505	1	1504	2512	0	1504
Ca. Chlorobium antarcticum	Ga0214219_10022492	Freshwater microbial communities from Trout Bog Lake, WI - 25JUL2007 hypolimnion	3300020735	Trout Bog Lake	Wisconsin, USA	97	1	1505	1	1504	2512	0	1504
Ca. Chlorobium antarcticum	Ga0214177_10001745	Freshwater microbial communities from Trout Bog Lake, WI - 27AUG2007 epilimnion	3300020705	Trout Bog Lake	Wisconsin, USA	97	1	1505	1	1504	2512	0	1504
Ca. Chlorobium antarcticum	Ga0214223_10005582	Freshwater microbial communities from Trout Bog Lake, WI - 27AUG2007 hypolimnion	3300020690	Trout Bog Lake	Wisconsin, USA	97	1	1505	1	1504	2512	0	1504
Ca. Chlorobium antarcticum	Ga0214209_1002775	Freshwater microbial communities from Trout Bog Lake, WI - 27JUL2009 epilimnion	3300021114	Trout Bog Lake	Wisconsin, USA	97	1	1505	1	1504	2512	0	1504
Ca. Chlorobium antarcticum	Ga0214254_100000213	Freshwater microbial communities from Trout Bog Lake, WI - 27JUL2009 hypolimnion	3300020715	Trout Bog Lake	Wisconsin, USA	97	1	1505	1	1504	2512	0	1504
Ca. Chlorobium antarcticum	Ga0214254_10000025	Freshwater microbial communities from Trout Bog Lake, WI - 27JUL2009 hypolimnion	3300020715	Trout Bog Lake	Wisconsin, USA	97	1	1505	1	1504	2512	0	1504
Ca. Chlorobium antarcticum	Ga0214216_10024242	Freshwater microbial communities from Trout Bog Lake, WI - 27JUN2007 hypolimnion	3300020730	Trout Bog Lake	Wisconsin, USA	97	1	1505	1	1504	2512	0	1504
Ca. Chlorobium antarcticum	Ga0214236_10000019	Freshwater microbial communities from Trout Bog Lake, WI - 28JUL2008 hypolimnion	3300020721	Trout Bog Lake	Wisconsin, USA	97	1	1505	1	1504	2512	0	1504
Ca. Chlorobium antarcticum	Ga0214236_10000012	Freshwater microbial communities from Trout Bog Lake, WI - 28JUL2008 hypolimnion	3300020721	Trout Bog Lake	Wisconsin, USA	97	1	1505	1	1504	2512	0	1504
Ca. Chlorobium antarcticum	Ga0214237_10012522	Freshwater microbial communities from Trout Bog Lake, WI - 29JUL2008 hypolimnion	3300020711	Trout Bog Lake	Wisconsin, USA	97	1	1505	1	1504	2512	0	1504
Ca. Chlorobium antarcticum	Ga0214250_1000001402	Freshwater microbial communities from Trout Bog Lake, WI - 29JUN2009 hypolimnion	3300020704	Trout Bog Lake	Wisconsin, USA	97	1	1505	1	1504	2512	0	1504
Ca. Chlorobium antarcticum	Ga0214250_1000001394	Freshwater microbial communities from Trout Bog Lake, WI - 29JUN2009 hypolimnion	3300020704	Trout Bog Lake	Wisconsin, USA	97	1	1505	1	1504	2512	0	1504
Ca. Chlorobium antarcticum	Ga0214220_10015332	Freshwater microbial communities from Trout Bog Lake, WI - 31JUL2007 hypolimnion	3300020726	Trout Bog Lake	Wisconsin, USA	97	1	1505	1	1504	2512	0	1504
Ca. Chlorobium antarcticum	Ga0214165_10042822	Freshwater microbial communities from Trout Bog Lake, WI - Practice 03JUN2009 hypolimnion	3300021137	Trout Bog Lake	Wisconsin, USA	97	1	1505	1	1504	2512	0	1504
Ca. Chlorobium antarcticum	Ga0214166_10035512	Freshwater microbial communities from Trout Bog Lake, WI - Practice 18AUG2009 epilimnion	3300021139	Trout Bog Lake	Wisconsin, USA	97	1	1505	1	1504	2512	0	1504
Ca. Chlorobium antarcticum	Ga0214167_10032765	Freshwater microbial communities from Trout Bog Lake, WI - Practice 18AUG2009 hypolimnion	3300021136	Trout Bog Lake	Wisconsin, USA	97	1	1505	1	1504	2512	0	1504
Ca. Chlorobium antarcticum	Ga0316226_10146674	Freshwater microbial communities from Trout Bog Lake, Wisconsin, USA - TBH18017	3300032562	Trout Bog Lake	Wisconsin, USA	97	1	1505	1	1504	2495	0	1504
Ca. Chlorobium antarcticum	Ga0359896_13234	Enriched cells from Trout Bog Lake Hypolimnion, Wisconsin, USA - BChl from Trout Bog BchlTB.Aug20.5000.01 .C5	3300032513	Trout Bog Lake	Wisconsin, USA	97	13	1504	1	1491	2471	0	1493
Ca. Chlorobium antarcticum	Ga0359897_104961	Enriched cells from Trout Bog Lake Hypolimnion, Wisconsin, USA - BChl from Trout Bog BchlTB.July23.5000.01.C4	3300032547	Trout Bog Lake	Wisconsin, USA	97	13	1504	1	1491	2471	0	1493
Ca. Chlorobium antarcticum	Ga0364868_103601	Enriched cells from Trout Bog Lake Hypolimnion, Wisconsin, USA - BchlTB.Aug07.5000.01.C3	3300032992	Trout Bog Lake	Wisconsin, USA	97	13	1504	1	1491	2471	0	1493
Ca. Chlorobium antarcticum	Ga0364869_11365	Enriched cells from Trout Bog Lake Hypolimnion, Wisconsin, USA - BchlTB.Aug07.5000.01.C4	3300032768	Trout Bog Lake	Wisconsin, USA	97	13	1504	1	1491	2471	0	1493
Ca. Chlorobium antarcticum	Ga0364870_11125	Enriched cells from Trout Bog Lake Hypolimnion, Wisconsin, USA - BchlTB.Aug07.5000.01.C5	3300032769	Trout Bog Lake	Wisconsin, USA	97	13	1504	1	1491	2471	0	1493
Ca. Chlorobium antarcticum	Ga0364872_11731	Enriched cells from Trout Bog Lake Hypolimnion, Wisconsin, USA - BchlTB.Aug07.5000.01.C7	3300032839	Trout Bog Lake	Wisconsin, USA	97	13	1504	1	1491	2471	0	1493
Ca. Chlorobium antarcticum	Ga0364861_11415	Enriched cells from Trout Bog Lake Hypolimnion, Wisconsin, USA - BchlTB.Aug13.5000.01.C3	3300032993	Trout Bog Lake	Wisconsin, USA	97	13	1504	1	1491	2471	0	1493
Ca. Chlorobium antarcticum	Ga0364862_10745	Enriched cells from Trout Bog Lake Hypolimnion, Wisconsin, USA - BchlTB.Aug13.5000.01.C4	3300032852	Trout Bog Lake	Wisconsin, USA	97	13	1504	1	1491	2471	0	1493
Ca. Chlorobium antarcticum	Ga0364863_11295	Enriched cells from Trout Bog Lake Hypolimnion, Wisconsin, USA - BchlTB.Aug13.5000.01.C5	3300032990	Trout Bog Lake	Wisconsin, USA	97	13	1504	1	1491	2471	0	1493
Ca. Chlorobium antarcticum	Ga0364864_12131	Enriched cells from Trout Bog Lake Hypolimnion, Wisconsin, USA - BchlTB.Aug13.5000.01.C6	3300032879	Trout Bog Lake	Wisconsin, USA	97	13	1504	1	1491	2471	0	1493
Ca. Chlorobium antarcticum	Ga0364865_104001	Enriched cells from Trout Bog Lake Hypolimnion, Wisconsin, USA - BchlTB.Aug13.5000.01.C7	3300032912	Trout Bog Lake	Wisconsin, USA	97	13	1504	1	1491	2471	0	1493
Ca. Chlorobium antarcticum	Ga0364857_103681	Enriched cells from Trout Bog Lake Hypolimnion, Wisconsin, USA - BchlTB.Aug20.5000.01 .C6	3300032765	Trout Bog Lake	Wisconsin, USA	97	13	1504	1	1491	2471	0	1493
Ca. Chlorobium antarcticum	Ga0364858_111381	Enriched cells from Trout Bog Lake Hypolimnion, Wisconsin, USA - BchlTB.Aug20.5000.01 .C7	3300032911	Trout Bog Lake	Wisconsin, USA	97	13	1504	1	1491	2471	0	1493
Ca. Chlorobium antarcticum	Ga0364860_121881	Enriched cells from Trout Bog Lake Hypolimnion, Wisconsin, USA - BchlTB.Aug20.5000.01 .D4	3300032878	Trout Bog Lake	Wisconsin, USA	97	13	1504	1	1491	2471	0	1493
Ca. Chlorobium antarcticum	Ga0364888_11601	Enriched cells from Trout Bog Lake Hypolimnion, Wisconsin, USA - BchlTB.July16.5000.01.C3	3300032887	Trout Bog Lake	Wisconsin, USA	97	13	1504	1	1491	2471	0	1493
Ca. Chlorobium antarcticum	Ga0364889_12655	Enriched cells from Trout Bog Lake Hypolimnion, Wisconsin, USA - BchlTB.July16.5000.01.C4	3300032841	Trout Bog Lake	Wisconsin, USA	97	13	1504	1	1491	2471	0	1493
Ca. Chlorobium antarcticum	Ga0364890_11681	Enriched cells from Trout Bog Lake Hypolimnion, Wisconsin, USA - BchlTB.July16.5000.01.C5	3300032865	Trout Bog Lake	Wisconsin, USA	97	13	1504	1	1491	2471	0	1493
Ca. Chlorobium antarcticum	Ga0364891_12361	Enriched cells from Trout Bog Lake Hypolimnion, Wisconsin, USA - BchlTB.July16.5000.01.C6	3300032964	Trout Bog Lake	Wisconsin, USA	97	13	1504	1	1491	2471	0	1493
Ca. Chlorobium antarcticum	Ga0364892_12545	Enriched cells from Trout Bog Lake Hypolimnion, Wisconsin, USA - BchlTB.July16.5000.01.C7	3300032840	Trout Bog Lake	Wisconsin, USA	97	13	1504	1	1491	2471	0	1493
Ca. Chlorobium antarcticum	Ga0364882_104121	Enriched cells from Trout Bog Lake Hypolimnion, Wisconsin, USA - BchlTB.July23.5000.01.C3	3300032775	Trout Bog Lake	Wisconsin, USA	97	13	1504	1	1491	2471	0	1493
Ca. Chlorobium antarcticum	Ga0364883_103661	Enriched cells from Trout Bog Lake Hypolimnion, Wisconsin, USA - BchlTB.July23.5000.01.C5	3300032994	Trout Bog Lake	Wisconsin, USA	97	13	1504	1	1491	2471	0	1493
Ca. Chlorobium antarcticum	Ga0364884_10905	Enriched cells from Trout Bog Lake Hypolimnion, Wisconsin, USA - BchlTB.July23.5000.01.C6	3300032766	Trout Bog Lake	Wisconsin, USA	97	13	1504	1	1491	2471	0	1493
Ca. Chlorobium antarcticum	Ga0364885_10865	Enriched cells from Trout Bog Lake Hypolimnion, Wisconsin, USA - BchlTB.July23.5000.01.C7	3300032995	Trout Bog Lake	Wisconsin, USA	97	13	1504	1	1491	2471	0	1493
Ca. Chlorobium antarcticum	Ga0364875_103521	Enriched cells from Trout Bog Lake Hypolimnion, Wisconsin, USA - BchlTB.July30.5000.01.C3	3300032767	Trout Bog Lake	Wisconsin, USA	97	13	1504	1	1491	2471	0	1493
Ca. Chlorobium antarcticum	Ga0364876_13321	Enriched cells from Trout Bog Lake Hypolimnion, Wisconsin, USA - BchlTB.July30.5000.01.C4	3300032838	Trout Bog Lake	Wisconsin, USA	97	13	1504	1	1491	2471	0	1493
Ca. Chlorobium antarcticum	Ga0364877_10961	Enriched cells from Trout Bog Lake Hypolimnion, Wisconsin, USA - BchlTB.July30.5000.01.C5	3300032998	Trout Bog Lake	Wisconsin, USA	97	13	1504	1	1491	2471	0	1493
Ca. Chlorobium antarcticum	Ga0364879_11231	Enriched cells from Trout Bog Lake Hypolimnion, Wisconsin, USA - BchlTB.July30.5000.01.C7	3300032804	Trout Bog Lake	Wisconsin, USA	97	13	1504	1	1491	2471	0	1493
Ca. Chlorobium antarcticum	Ga0351894_11365	Enriched cells from Trout Bog Lake water, Wisconsin, United States - BchlTB.Aug20.5000.01 .C3	3300032553	Trout Bog Lake	Wisconsin, USA	97	13	1504	1	1491	2471	0	1493
Ca. Chlorobium antarcticum	Ga0351895_12321	Enriched cells from Trout Bog Lake water, Wisconsin, United States - BchlTB.Aug20.5000.01 .C4	3300032554	Trout Bog Lake	Wisconsin, USA	97	13	1504	1	1491	2471	0	1493
Ca. Chlorobium antarcticum	Ga0364893_113421	Enriched cells from Trout Bog Lake Hypolimnion, Wisconsin, USA - BchlTB.July16.5000.01.D3	3300032806	Trout Bog Lake	Wisconsin, USA	97	40	1505	1	1465	2423	0	1465
Ca. Chlorobium antarcticum	G310J44882_100102064	Combined Assembly of freshwater hypolimnion microbial communities from Trout Bog Lake, Wisconsin, USA	3300002933	Trout Bog Lake	Wisconsin, USA	97	21	1422	1	1401	2329	0	1401
Ca. Chlorobium antarcticum	TB03JUN2009H_0000575	Freshwater microbial communities from Trout Bog Lake, WI - Practice 03JUN2009 hypolimnion	3300000162	Trout Bog Lake	Wisconsin, USA	97	21	1422	1	1401	2322	0	1401
Ca. Chlorobium antarcticum	TB18AUG2009E_0007412	Freshwater microbial communities from Trout Bog Lake, WI - Practice 18AUG2009 epilimnion	3300000203	Trout Bog Lake	Wisconsin, USA	97	21	1422	1	1401	2327	0	1401
Ca. Chlorobium antarcticum	TB18AUG2009H_0005917	Freshwater microbial communities from Trout Bog Lake, WI - Practice 18AUG2009 hypolimnion	3300000177	Trout Bog Lake	Wisconsin, USA	97	21	1422	1	1401	2322	0	1401
Ca. Chlorobium antarcticum	TBL_comb47_HYPODRAFT_100684053	Trout Bog Lake May 28 2007 Hypolimnion (Trout Bog Lake Combined Assembly 47 Hypolimnion Samples, Aug 2012 Assem)	3300000553	Trout Bog Lake	Wisconsin, USA	97	21	1422	1	1401	2327	0	1401
Ca. Chlorobium antarcticum	Ga0364871_11904	Enriched cells from Trout Bog Lake Hypolimnion, Wisconsin, USA - BchlTB.Aug07.5000.01.C6	3300032997	Trout Bog Lake	Wisconsin, USA	97	161	1504	1	1343	2237	0	1345
Ca. Chlorobium antarcticum	Ga0364902_11194	Enriched cells from Trout Bog Lake Hypolimnion, Wisconsin, USA - BchlTB.July02.5000.02.C3	3300032973	Trout Bog Lake	Wisconsin, USA	97	161	1504	1	1343	2237	0	1345
Ca. Chlorobium antarcticum	Ga0265281_12811	Green sulfur bacteria associated microbial communities from Trout Bog Lake, Wisconsin, USA - Chlorobi peak TB 13	3300024488	Trout Bog Lake	Wisconsin, USA	97	161	1504	1	1343	2237	0	1345
Ca. Chlorobium antarcticum	Ga0364903_11781	Enriched cells from Trout Bog Lake Hypolimnion, Wisconsin, USA - BchlTB.July02.5000.02.C4	3300032881	Trout Bog Lake	Wisconsin, USA	97	161	1505	1	1344	2255	0	1344
Ca. Chlorobium antarcticum	Ga0364904_11244	Enriched cells from Trout Bog Lake Hypolimnion, Wisconsin, USA - BchlTB.July02.5000.02.C5	3300032842	Trout Bog Lake	Wisconsin, USA	97	161	1505	1	1344	2255	0	1344
Ca. Chlorobium antarcticum	Ga0364905_12424	Enriched cells from Trout Bog Lake Hypolimnion, Wisconsin, USA - BchlTB.July02.5000.02.C6	3300032871	Trout Bog Lake	Wisconsin, USA	97	161	1505	1	1344	2266	0	1344
Ca. Chlorobium antarcticum	Ga0364906_12324	Enriched cells from Trout Bog Lake Hypolimnion, Wisconsin, USA - BchlTB.July02.5000.02.C7	3300032873	Trout Bog Lake	Wisconsin, USA	97	161	1505	1	1344	2261	0	1344
Ca. Chlorobium antarcticum	Ga0364895_11984	Enriched cells from Trout Bog Lake Hypolimnion, Wisconsin, USA - BchlTB.July09.5000.02.C3	3300032866	Trout Bog Lake	Wisconsin, USA	97	161	1505	1	1344	2255	0	1344
Ca. Chlorobium antarcticum	Ga0364896_11224	Enriched cells from Trout Bog Lake Hypolimnion, Wisconsin, USA - BchlTB.July09.5000.02.C4	3300032853	Trout Bog Lake	Wisconsin, USA	97	161	1505	1	1344	2255	0	1344
Ca. Chlorobium antarcticum	Ga0364897_12844	Enriched cells from Trout Bog Lake Hypolimnion, Wisconsin, USA - BchlTB.July09.5000.02.C5	3300032858	Trout Bog Lake	Wisconsin, USA	97	161	1505	1	1344	2261	0	1344
Ca. Chlorobium antarcticum	Ga0364898_12214	Enriched cells from Trout Bog Lake Hypolimnion, Wisconsin, USA - BchlTB.July09.5000.02.C6	3300032807	Trout Bog Lake	Wisconsin, USA	97	161	1505	1	1344	2239	0	1344
Ca. Chlorobium antarcticum	Ga0364916_104534	Enriched cells from Trout Bog Lake Hypolimnion, Wisconsin, USA - BchlTB.June20.5000.01.C4	3300032999	Trout Bog Lake	Wisconsin, USA	97	161	1505	1	1344	2255	0	1344
Ca. Chlorobium antarcticum	Ga0364917_13201	Enriched cells from Trout Bog Lake Hypolimnion, Wisconsin, USA - BchlTB.June20.5000.01.C5	3300032874	Trout Bog Lake	Wisconsin, USA	97	161	1505	1	1344	2255	0	1344
Ca. Chlorobium antarcticum	Ga0364919_109281	Enriched cells from Trout Bog Lake Hypolimnion, Wisconsin, USA - BchlTB.June20.5000.01.C7	3300032867	Trout Bog Lake	Wisconsin, USA	97	161	1505	1	1344	2255	0	1344
Ca. Chlorobium antarcticum	Ga0364920_107424	Enriched cells from Trout Bog Lake Hypolimnion, Wisconsin, USA - BchlTB.June20.5000.01.C8	3300032778	Trout Bog Lake	Wisconsin, USA	97	161	1505	1	1344	2255	0	1344
Ca. Chlorobium antarcticum	Ga0364909_107144	Enriched cells from Trout Bog Lake Hypolimnion, Wisconsin, USA - BchlTB.June25.5000.01.C3	3300032780	Trout Bog Lake	Wisconsin, USA	97	161	1505	1	1344	2255	0	1344
Ca. Chlorobium antarcticum	Ga0364910_13971	Enriched cells from Trout Bog Lake Hypolimnion, Wisconsin, USA - BchlTB.June25.5000.01.C4	3300032870	Trout Bog Lake	Wisconsin, USA	97	161	1505	1	1344	2255	0	1344
Ca. Chlorobium antarcticum	Ga0364911_11974	Enriched cells from Trout Bog Lake Hypolimnion, Wisconsin, USA - BchlTB.June25.5000.01.C5	3300032872	Trout Bog Lake	Wisconsin, USA	97	161	1505	1	1344	2255	0	1344
Ca. Chlorobium antarcticum	Ga0364912_12071	Enriched cells from Trout Bog Lake Hypolimnion, Wisconsin, USA - BchlTB.June25.5000.01.C6	3300033003	Trout Bog Lake	Wisconsin, USA	97	161	1505	1	1344	2255	0	1344
Ca. Chlorobium antarcticum	Ga0364913_13294	Enriched cells from Trout Bog Lake Hypolimnion, Wisconsin, USA - BchlTB.June25.5000.01.C7	3300032779	Trout Bog Lake	Wisconsin, USA	97	161	1505	1	1344	2255	0	1344
Ca. Chlorobium antarcticum	Ga0364915_111654	Enriched cells from Trout Bog Lake Hypolimnion, Wisconsin, USA - BchlTB.June25.5000.01.D4	3300032972	Trout Bog Lake	Wisconsin, USA	97	161	1505	1	1344	2233	0	1344
Ca. Chlorobium antarcticum	Ga0364878_11723	Enriched cells from Trout Bog Lake Hypolimnion, Wisconsin, USA - BchlTB.July30.5000.01.C6	3300032996	Trout Bog Lake	Wisconsin, USA	97	187	1504	1	1317	2200	0	1319
Ca. Chlorobium antarcticum	Ga0214200_10208441	Freshwater microbial communities from Trout Bog Lake, WI - 23OCT2008 epilimnion	3300020725	Trout Bog Lake	Wisconsin, USA	97	1	806	1	805	1332	0	805
Ca. Chlorobium antarcticum	Ga0214200_10040264	Freshwater microbial communities from Trout Bog Lake, WI - 23OCT2008 epilimnion	3300020725	Trout Bog Lake	Wisconsin, USA	97	737	1505	1	769	1310	0	769
Ca. Chlorobium antarcticum	WSSedL1CaDRAFT_100449031	Wetland microbial communities from Twitchell Island in the Sacramento Delta, sample from surface sediment Feb2011 Site L1 Cattail	3300000318	Twitchell Island	California, USA	97	632	1422	1	791	1323	0	791
Ca. Chlorobium antarcticum	Ga0370511_0047377_1_1300	Peat soil microbial communities from wetlands in Alaska, United States - Frozen_pond_0310_18	3300035210	untreated peat soil	Alaska, USA	97	204	1504	1	1300	2163	0	1300
Ca. Chlorobium antarcticum	Ga0370504_0028942_86_1385	Peat soil microbial communities from wetlands in Alaska, United States - Frozen_pond_03D_18	3300034349	untreated peat soil	Alaska, USA	97	204	1504	1	1300	2163	0	1300
Ca. Chlorobium antarcticum	Ga0208389_10035275	Freshwater microbial communities from Crystal Bog, Wisconsin, USA - CBH12Aug09 (SPAdes)	3300025470	Crystal Bog	Wisconsin, USA	96	1	1504	1	1503	2483	0	1505
Ca. Chlorobium antarcticum	Ga0007862_10008305	Freshwater microbial communities from Crystal Bog, Wisconsin, USA - CBH20Aug07	3300006108	Crystal Bog	Wisconsin, USA	96	1	1504	1	1503	2477	0	1505
Ca. Chlorobium antarcticum	Ga0207959_10004298	Freshwater microbial communities from Crystal Bog, Wisconsin, USA - CBH20Aug07 (SPAdes)	3300025387	Crystal Bog	Wisconsin, USA	96	1	1504	1	1503	2477	0	1505
Ca. Chlorobium antarcticum	Ga0007859_10016805	Freshwater microbial communities from Crystal Bog, Wisconsin, USA - CBH27Jul07	3300006118	Crystal Bog	Wisconsin, USA	96	1	1504	1	1503	2477	0	1505
Ca. Chlorobium antarcticum	Ga0207958_10068393	Freshwater microbial communities from Crystal Bog, Wisconsin, USA - CBH27Jul07 (SPAdes)	3300025421	Crystal Bog	Wisconsin, USA	96	1	1504	1	1503	2477	0	1505
Ca. Chlorobium antarcticum	Ga0208385_10010644	Freshwater microbial communities from Crystal Bog, Wisconsin, USA - CBH11Jul08 (SPAdes)	3300025363	Crystal Bog	Wisconsin, USA	96	1	1505	1	1504	2479	0	1504
Ca. Chlorobium antarcticum	Ga0208505_10010844	Freshwater microbial communities from Crystal Bog, Wisconsin, USA - CBH15Jul08 (SPAdes)	3300025366	Crystal Bog	Wisconsin, USA	96	1	1505	1	1504	2479	0	1504
Ca. Chlorobium antarcticum	Ga0208102_10042052	Freshwater microbial communities from Crystal Bog, Wisconsin, USA - MA17M (SPAdes)	3300025447	Crystal Bog	Wisconsin, USA	96	1	1505	1	1504	2479	0	1504
Ca. Chlorobium antarcticum	Ga0007815_10204572	Freshwater microbial communities from Crystal Bog, Wisconsin, USA - CBE02Aug09	3300006114	Crystal Bog	Wisconsin, USA	96	1	1098	1	1097	1783	0	1097
Ca. Chlorobium antarcticum	Ga0007875_10106571	Freshwater microbial communities from Crystal Bog, Wisconsin, USA - CBH18Aug09	3300003823	Crystal Bog	Wisconsin, USA	96	1	851	1	850	1378	0	850
Ca. Chlorobium antarcticum	Ga0208376_10298981	Freshwater microbial communities from Crystal Bog, Wisconsin, USA - MA2.5M (SPAdes)	3300025455	Crystal Bog	Wisconsin, USA	96	1	835	1	834	1358	0	834
Ca. Chlorobium antarcticum	Ga0007797_10477761	Freshwater microbial communities from Crystal Bog, Wisconsin, USA - MA2.5M	3300004771	Crystal Bog	Wisconsin, USA	96	1	812	1	811	1315	0	811
Ca. Chlorobium antarcticum	Ga0194047_100855741	Anoxic zone freshwater microbial communities from boreal shield lake in IISD Experimental Lakes Area, Ontario, Canada - Jun2016-L221-5m	3300021354	Experimental Lakes Area	Canada	96	142	1504	1	1362	2250	0	1362
Ca. Chlorobium antarcticum	Ga0209467_100020273	Freshwater pond sediment microbial communities from the University of Edinburgh, under environmental carbon perturbations - High cellulose week 11 (SPAdes)	3300027719	Lab Microcosm	Edinburgh, UK	96	1	1505	1	1504	2468	0	1504
Ca. Chlorobium antarcticum	Ga0209467_100020236	Freshwater pond sediment microbial communities from the University of Edinburgh, under environmental carbon perturbations - High cellulose week 11 (SPAdes)	3300027719	Lab Microcosm	Edinburgh, UK	96	1	1505	1	1504	2468	0	1504
Ca. Chlorobium antarcticum	Ga0209800_1000006036	Freshwater pond sediment microbial communities from the University of Edinburgh, under environmental carbon perturbations - High cellulose week 8 (SPAdes)	3300027800	Lab Microcosm	Edinburgh, UK	96	1	1505	1	1504	2462	0	1504
Ca. Chlorobium antarcticum	Ga0209800_1000006073	Freshwater pond sediment microbial communities from the University of Edinburgh, under environmental carbon perturbations - High cellulose week 8 (SPAdes)	3300027800	Lab Microcosm	Edinburgh, UK	96	1	1505	1	1504	2462	0	1504
Ca. Chlorobium antarcticum	Ga0209262_100044395	Freshwater pond sediment microbial communities from the University of Edinburgh, under environmental carbon perturbations - Low cellulose week 11 (SPAdes)	3300027841	Lab Microcosm	Edinburgh, UK	96	1	1505	1	1504	2462	0	1504
Ca. Chlorobium antarcticum	Ga0209575_100034355	Freshwater pond sediment microbial communities from the University of Edinburgh, under environmental carbon perturbations - Medium cellulose week 11 (SPAdes)	3300027739	Lab Microcosm	Edinburgh, UK	96	1	1505	1	1504	2451	0	1504
Ca. Chlorobium antarcticum	Ga0209373_1000152328	Freshwater pond sediment microbial communities from the University of Edinburgh, under environmental carbon perturbations - High cellulose week 5 (SPAdes)	3300027796	Lab Microcosm	Edinburgh, UK	96	1	819	1	818	1328	0	818
Ca. Chlorobium antarcticum	Ga0168062_1035943	Synthetic microbial communities for library methods comparison from University of Liverpool, United Kingdom - Mg47	3300029205	Lab-generated synthetic community	Liverpool, UK	96	2	1505	2	1505	2429	0	1505
Ca. Chlorobium antarcticum	Ga0168060_10070810	Synthetic microbial communities for library methods comparison from University of Liverpool, United Kingdom - Mg49	3300029189	Lab-generated synthetic community	Liverpool, UK	96	1	1504	1	1503	2433	0	1505
Ca. Chlorobium antarcticum	Ga0168446_1005361	Synthetic microbial communities for library methods comparison from University of Liverpool, United Kingdom - Mg50	3300014929	Lab-generated synthetic community	Liverpool, UK	96	151	1504	1	1353	2167	0	1355
Ca. Chlorobium antarcticum	Ga0168075_1242331	Synthetic microbial communities for library methods comparison from University of Liverpool, United Kingdom - Mg12	3300029221	Lab-generated synthetic community	Liverpool, UK	96	1	874	1	874	1437	0	874
Ca. Chlorobium antarcticum	Ga0209696_1000031	Freshwater lake bacterial and archeal communities from Alinen Mustajarvi, Finland, to study Microbial Dark Matter (Phase II) - Alinen Mustajarvi 4m metaG (SPAdes)	3300025025	Lake Alinen Mustajarvi	Finland	96	1	1504	1	1503	2466	0	1505
Ca. Chlorobium antarcticum	Ga0209697_100239275	Freshwater lake bacterial and archeal communities from Alinen Mustajarvi, Finland, to study Microbial Dark Matter (Phase II) - Alinen Mustajarvi 5m metaG (SPAdes)	3300025316	Lake Alinen Mustajarvi	Finland	96	1	1504	1	1503	2471	0	1505
Ca. Chlorobium antarcticum	Ga0239581_10001984	Freshwater lake microbial communities from Alinen Mustajarvi, Finland - AM11	3300029798	Lake Alinen Mustajarvi	Finland	96	1	1504	1	1503	2471	0	1505
Ca. Chlorobium antarcticum	Ga0239579_100015055	Freshwater lake microbial communities from Alinen Mustajarvi, Finland - AM13	3300029442	Lake Alinen Mustajarvi	Finland	96	1	1504	1	1503	2471	0	1505
Ca. Chlorobium antarcticum	Ga0209083_10113111	Freshwater microbial communities from Finland to study Microbial Dark Matter (Phase II) - AM7a DNA metaG (SPAdes)	3300025162	Lake Alinen Mustajarvi	Finland	96	1	1504	1	1503	2466	0	1505
Ca. Chlorobium antarcticum	Ga0212088_100420101	Alinen_combined assembly	3300022555	Lake Alinen Mustajarvi	Finland	96	1	1504	1	1503	2471	0	1505
Ca. Chlorobium antarcticum	Ga0209696_1000035	Freshwater lake bacterial and archeal communities from Alinen Mustajarvi, Finland, to study Microbial Dark Matter (Phase II) - Alinen Mustajarvi 4m metaG (SPAdes)	3300025025	Lake Alinen Mustajarvi	Finland	96	1	1379	1	1378	2241	0	1380
Ca. Chlorobium antarcticum	Ga0138308_10123122	Microbial communities from Lake Cadagno chemocline, Switzerland. Combined Assembly of Gp0156211, Gp0156621	3300010965	Lake Cadagno	Switzerland	96	1	1504	1	1503	2427	0	1505
Ca. Chlorobium antarcticum	Ga0138308_1019492	Microbial communities from Lake Cadagno chemocline, Switzerland. Combined Assembly of Gp0156211, Gp0156621	3300010965	Lake Cadagno	Switzerland	96	1	1504	1	1503	2427	0	1505
Ca. Chlorobium antarcticum	Ga0316612_10019306	Microbial mat bacterial communities from Middle Island sinkhole, Lake Huron, Michigan, United States - MIS.2016.226	3300033494	Lake Huron	Michigan, USA	96	1	1505	1	1504	2412	0	1504
Ca. Chlorobium antarcticum	Ga0136653_100060356	Anoxic lake water microbial communities from Lake Kivu, Rwanda to study Microbial Dark Matter (Phase II) - Lake Kivu water 275m metaG	3300010319	Lake Kiwu	Rwanda	96	1	1505	1	1504	2451	0	1504
Ca. Chlorobium antarcticum	Ga0209610_10058565	Anoxic lake water microbial communities from Lake Kivu, Rwanda to study Microbial Dark Matter (Phase II) - Lake Kivu water 275m metaG (SPAdes)	3300025136	Lake Kiwu	Rwanda	96	1	1505	1	1504	2451	0	1504
Ca. Chlorobium antarcticum	Ga0116202_100077534	Anoxic lake water microbial communities from Lake Kivu, Rwanda to study Microbial Dark Matter (Phase II) - Lake Kivu water 325m metaG	3300010302	Lake Kiwu	Rwanda	96	1	1505	1	1504	2451	0	1504
Ca. Chlorobium antarcticum	Ga0209609_100113124	Anoxic lake water microbial communities from Lake Kivu, Rwanda to study Microbial Dark Matter (Phase II) - Lake Kivu water 325m metaG (SPAdes)	3300025145	Lake Kiwu	Rwanda	96	1	1505	1	1504	2451	0	1504
Ca. Chlorobium antarcticum	Ga0209835_10051612	Anoxic lake water microbial communities from Lake Kivu, Rwanda to study Microbial Dark Matter (Phase II) - Lake Kivu water 52m metaG (SPAdes)	3300025115	Lake Kiwu	Rwanda	96	1	1505	1	1504	2451	0	1504
Ca. Chlorobium antarcticum	Ga0163209_10036504	Freshwater microbial communities from Lake Kivu, Western Province, Rwanda to study Microbial Dark Matter (Phase II) - Kivu_160m	3300013090	Lake Kiwu	Rwanda	96	1	1505	1	1504	2451	0	1504
Ca. Chlorobium antarcticum	Ga0208828_10110873	Freshwater microbial communities from Lake Kivu, Western Province, Rwanda to study Microbial Dark Matter (Phase II) - Kivu_160m (SPAdes)	3300025807	Lake Kiwu	Rwanda	96	1	1505	1	1504	2451	0	1504
Ca. Chlorobium antarcticum	Ga0163210_10029124	Freshwater microbial communities from Lake Kivu, Western Province, Rwanda to study Microbial Dark Matter (Phase II) - Kivu_220m	3300013091	Lake Kiwu	Rwanda	96	1	1505	1	1504	2451	0	1504
Ca. Chlorobium antarcticum	Ga0208047_10021025	Freshwater microbial communities from Lake Kivu, Western Province, Rwanda to study Microbial Dark Matter (Phase II) - Kivu_220m (SPAdes)	3300025279	Lake Kiwu	Rwanda	96	1	1505	1	1504	2451	0	1504
Ca. Chlorobium antarcticum	Ga0212121_100052597	Kivu_combined assembly	3300022556	Lake Kiwu	Rwanda	96	1	1505	1	1504	2451	0	1504
Ca. Chlorobium antarcticum	Ga0172362_100107857	Sediment microbial communities from Lake Kivu, Rwanda - Sediment s1_kivu2a2	3300013133	Lake Kiwu	Rwanda	96	1	1505	1	1504	2451	0	1504
Ca. Chlorobium antarcticum	Ga0172363_100141832	Sediment microbial communities from Lake Kivu, Rwanda - Sediment s2_kivu2a2	3300013130	Lake Kiwu	Rwanda	96	1	1505	1	1504	2451	0	1504
Ca. Chlorobium antarcticum	Ga0172364_100064376	Sediment microbial communities from Lake Kivu, Rwanda - Sediment site 10cm	3300013129	Lake Kiwu	Rwanda	96	1	1505	1	1504	2451	0	1504
Ca. Chlorobium antarcticum	Ga0172366_100565374	Sediment microbial communities from Lake Kivu, Rwanda - Sediment site 69cm	3300013128	Lake Kiwu	Rwanda	96	1	1505	1	1504	2451	0	1504
Ca. Chlorobium antarcticum	Ga0116204_10557601	Anoxic lake water microbial communities from Lake Kivu, Rwanda to study Microbial Dark Matter (Phase II) - Lake Kivu water 52m metaG	3300010293	Lake Kiwu	Rwanda	96	164	1505	2	1342	2206	0	1342
Ca. Chlorobium antarcticum	Ga0172365_101460152	Sediment microbial communities from Lake Kivu, Rwanda - Sediment site 48cm	3300013127	Lake Kiwu	Rwanda	96	1	1088	1	1087	1742	0	1087
Ca. Chlorobium antarcticum	Ga0247835_10106383	Freshwater microbial communities from meromictic Lake La Cruz, Castile-La Mancha, Spain - LaCruzMarch2015_13.5m	3300028114	Lake La Cruz	Spain	96	1	1504	1	1504	2468	0	1506
Ca. Chlorobium antarcticum	Ga0247838_10441101	Freshwater microbial communities from meromictic Lake La Cruz, Castile-La Mancha, Spain - LaCruzMarch2015_15m	3300028044	Lake La Cruz	Spain	96	1	1504	1	1504	2468	0	1506
Ca. Chlorobium antarcticum	Ga0247839_100038961	Freshwater microbial communities from meromictic Lake La Cruz, Castile-La Mancha, Spain - LaCruzMarch2015_16m	3300028553	Lake La Cruz	Spain	96	1	1504	1	1504	2473	0	1506
Ca. Chlorobium antarcticum	Ga0247842_1000669210	Freshwater microbial communities from meromictic Lake La Cruz, Castile-La Mancha, Spain - LaCruzMarch2015_19m	3300029268	Lake La Cruz	Spain	96	1	1504	1	1504	2473	0	1506
Ca. Chlorobium antarcticum	Ga0247841_100354215	Freshwater microbial communities from meromictic Lake La Cruz, Castile-La Mancha, Spain - LaCruzMarch2015_18m	3300029286	Lake La Cruz	Spain	96	89	1504	1	1416	2322	0	1418
Ca. Chlorobium antarcticum	Ga0233419_1000000928	Freshwater microbial communities from Lake Matano, South Sulawesi, Indonesia - Watercolumn_Matano_2014_100_MG	3300028737	Lake Matano	Indonesia	96	2	1505	2	1504	2460	0	1504
Ca. Chlorobium antarcticum	Ga0233420_1000011928	Freshwater microbial communities from Lake Matano, South Sulawesi, Indonesia - Watercolumn_Matano_2014_102_MG	3300024300	Lake Matano	Indonesia	96	2	1505	2	1504	2416	0	1504
Ca. Chlorobium antarcticum	Ga0233421_1000008324	Freshwater microbial communities from Lake Matano, South Sulawesi, Indonesia - Watercolumn_Matano_2014_107_MG	3300024341	Lake Matano	Indonesia	96	2	1505	2	1504	2416	0	1504
Ca. Chlorobium antarcticum	Ga0233422_1000003333	Freshwater microbial communities from Lake Matano, South Sulawesi, Indonesia - Watercolumn_Matano_2014_110_MG	3300024333	Lake Matano	Indonesia	96	2	1505	2	1504	2433	0	1504
Ca. Chlorobium antarcticum	Ga0233423_1000004357	Freshwater microbial communities from Lake Matano, South Sulawesi, Indonesia - Watercolumn_Matano_2014_112_MG	3300023177	Lake Matano	Indonesia	96	2	1505	2	1504	2416	0	1504
Ca. Chlorobium antarcticum	Ga0236337_11094983	Freshwater microbial communities from thermokarst lake SAS2a, Kuujjuarapick, Canada - Sample Winter W1	3300022653	Lake SAS2a	Canada	96	1	1505	1	1505	2475	0	1505
Ca. Chlorobium antarcticum	Ga0236338_10026954	Freshwater microbial communities from thermokarst lake SAS2a, Kuujjuarapick, Canada - Sample Winter W2	3300022593	Lake SAS2a	Canada	96	1	1505	1	1505	2475	0	1505
Ca. Chlorobium antarcticum	Ga0236339_11254214	Freshwater microbial communities from thermokarst lake SAS2a, Kuujjuarapick, Canada - Sample Winter W3	3300022650	Lake SAS2a	Canada	96	1	1505	1	1505	2486	0	1505
Ca. Chlorobium antarcticum	Ga0194119_100351474	Freshwater microbial communities from Lake Tanganyika, Tanzania - TA2015018 Mahale Deep Cast 100m	3300020220	Lake Tanganyika	Tanzania	96	1	1505	1	1505	2470	0	1505
Ca. Chlorobium antarcticum	Ga0194120_100276605	Freshwater microbial communities from Lake Tanganyika, Tanzania - TA2015019 Mahale Deep Cast 65m	3300020198	Lake Tanganyika	Tanzania	96	1	1505	1	1505	2470	0	1505
Ca. Chlorobium antarcticum	Ga0194110_100326974	Freshwater microbial communities from Lake Tanganyika, Tanzania - TA2015032 Kigoma Deep Cast 1200m	3300020084	Lake Tanganyika	Tanzania	96	1	1505	1	1505	2470	0	1505
Ca. Chlorobium antarcticum	Ga0194111_100083887	Freshwater microbial communities from Lake Tanganyika, Tanzania - TA2015033 Kigoma Deep Cast 300m	3300020083	Lake Tanganyika	Tanzania	96	1	1505	1	1505	2470	0	1505
Ca. Chlorobium antarcticum	Ga0194127_100270422	Freshwater microbial communities from Lake Tanganyika, Tanzania - TA2015036 Kigoma Deep Cast 100m	3300020221	Lake Tanganyika	Tanzania	96	1	1505	1	1505	2470	0	1505
Ca. Chlorobium antarcticum	Ga0194112_102214311	Freshwater microbial communities from Lake Tanganyika, Tanzania - TA2015016 Mahale Deep Cast 400m	3300020109	Lake Tanganyika	Tanzania	96	1	1417	1	1417	2318	0	1420
Ca. Chlorobium antarcticum	Ga0194113_102183131	Freshwater microbial communities from Lake Tanganyika, Tanzania - TA2015017 Mahale Deep Cast 200m	3300020074	Lake Tanganyika	Tanzania	96	1	1417	1	1417	2302	0	1420
Ca. Chlorobium antarcticum	Ga0194125_101866701	Freshwater microbial communities from Lake Tanganyika, Tanzania - TA2015034 Kigoma Deep Cast 250m	3300020222	Lake Tanganyika	Tanzania	96	1	1417	1	1417	2318	0	1420
Ca. Chlorobium antarcticum	Ga0194126_101863771	Freshwater microbial communities from Lake Tanganyika, Tanzania - TA2015035 Kigoma Deep Cast 150m	3300020603	Lake Tanganyika	Tanzania	96	1	1417	1	1417	2318	0	1420
Ca. Chlorobium antarcticum	Ga0194128_101091802	Freshwater microbial communities from Lake Tanganyika, Tanzania - TA2015037 Kigoma Deep Cast 65m	3300020197	Lake Tanganyika	Tanzania	96	1	1132	1	1132	1831	0	1132
Ca. Chlorobium antarcticum	GooDraft_10000842	Lentic microbial communities from Wellesley MA, that are anoxygenic and photosynthetic, sample Photosynthetic Consortia 720nm	3300000496	Lake Waban	Massachusetts, USA	96	21	1422	1	1401	2250	0	1401
Ca. Chlorobium antarcticum	Ga0272442_10000044148	Marine sediment archaeal communities from Little Sippewissett salt marsh, Falmouth, MA, United States - SSM-Form-2O	3300030616	Little Sippewissett salt marsh	Massachusetts, USA	96	2	1505	2	1505	2407	0	1505
Ca. Chlorobium antarcticum	Ga0272441_100387925	Marine sediment archaeal communities from Little Sippewissett salt marsh, Falmouth, MA, United States - SSM-Prop-6N	3300028920	Little Sippewissett salt marsh	Massachusetts, USA	96	2	1505	2	1505	2407	0	1505
Ca. Chlorobium antarcticum	Ga0272444_102442581	Marine sediment archaeal communities from Little Sippewissett salt marsh, Falmouth, MA, United States - SSM-Form-13	3300031111	Little Sippewissett salt marsh	Massachusetts, USA	96	90	1417	1	1328	2137	0	1331
Ca. Chlorobium antarcticum	Ga0272443_101579321	Marine sediment archaeal communities from Little Sippewissett salt marsh, Falmouth, MA, United States - SSM-Acet-12	3300028883	Little Sippewissett salt marsh	Massachusetts, USA	96	89	1246	1	1158	1857	0	1158
Ca. Chlorobium antarcticum	Ga0326729_10160661	Lab enriched peat soil microbial communities from Michigan Hollow, Ithaca, NY, United States - MHF6AY SIP fraction	3300033432	Michigan Hollow	New York, USA	96	262	1505	2	1245	1999	0	1245
Ca. Chlorobium antarcticum	Ga0326726_100273946	Lab enriched peat soil microbial communities from Michigan Hollow, Ithaca, NY, United States - MHF15MN	3300033433	Michigan Hollow	New York, USA	96	1	926	1	925	1493	0	925
Ca. Chlorobium antarcticum	Ga0209288_100009888	Freshwater sediment microbial communities from Prairie Pothole Lake near Jamestown, North Dakota, USA - PPLs Lake P8 Core (1) Depth 1-3cm September2015 (SPAdes)	3300027762	Prairie Pothole Lake	North Dakota, USA	96	1	1505	1	1504	2468	0	1504
Ca. Chlorobium antarcticum	Ga0209285_100015366	Freshwater sediment microbial communities from Prairie Pothole Lake near Jamestown, North Dakota, USA - PPLs Lake P8 Core (3) Depth 1-3cm March2015 (SPAdes)	3300027726	Prairie Pothole Lake	North Dakota, USA	96	1	1505	1	1504	2462	0	1504
Ca. Chlorobium antarcticum	Ga0268276_10157804	Saline water microbial communities from Sakinaw Lake, British Columbia, Canada - sak_2010_1_5_45m	3300028299	Sakinaw Lake	Canada	96	1	1504	1	1503	2466	0	1505
Ca. Chlorobium antarcticum	Ga0265593_10021734	Saline water microbial communities from Sakinaw Lake, British Columbia, Canada - sak_2011_5_24_36m	3300028178	Sakinaw Lake	Canada	96	1	1504	1	1503	2466	0	1505
Ca. Chlorobium antarcticum	Ga0268280_10036207	Saline water microbial communities from Sakinaw Lake, British Columbia, Canada - sak_2011_5_24_40m	3300028298	Sakinaw Lake	Canada	96	1	1504	1	1503	2466	0	1505
Ca. Chlorobium antarcticum	Ga0268283_10024404	Saline water microbial communities from Sakinaw Lake, British Columbia, Canada - sak_2013_06_06_36m	3300028283	Sakinaw Lake	Canada	96	1	1504	1	1503	2466	0	1505
Ca. Chlorobium antarcticum	Ga0268284_10040344	Saline water microbial communities from Sakinaw Lake, British Columbia, Canada - sak_2013_06_06_40m	3300028176	Sakinaw Lake	Canada	96	1	1504	1	1503	2466	0	1505
Ca. Chlorobium antarcticum	Ga0075319_10048941	Natural and restored wetland microbial communities from the San Francisco Bay, California, USA, that impact long-term carbon sequestration - MayberryNE_TuleC_D1	3300014257	San Francisco Bay	California, USA	96	1	1504	1	1503	2444	0	1504
Ca. Chlorobium antarcticum	Ga0208536_10002963	Natural and restored wetland microbial communities from the San Francisco Bay, California, USA, that impact long-term carbon sequestration - MayberryNE_TuleC_D1 (SPAdes)	3300026038	San Francisco Bay	California, USA	96	1	1505	1	1504	2451	0	1504
Ca. Chlorobium antarcticum	Ga0310740_0007693_6109_7609	Peat soil microbial communities from Stordalen Mire, Sweden - 717 E1 1-5 (v2)	3300037549	Stordalen Mire	Sweden	96	3	1504	1	1501	2440	0	1501
Ca. Chlorobium antarcticum	TB_FS06_10DRAFT_10045762	Groundwater microbial communities from subsurface biofilms in sulfidic aquifier in Frasassi Gorge, Italy, sample from two redox zones- FS06_10	3300000233	Sulfidic aquifier in Frasassi Gorge	Italy	96	21	1417	1	1396	2252	0	1401
Ca. Chlorobium antarcticum	TBL_comb48_EPIDRAFT_10045164	Trout Bog Lake June 7 2007 Epilimnion (Trout Bog Lake Combined Assembly 48 Epilimnion Samples, Aug 2012 Assem)	3300000439	Trout Bog Lake	Wisconsin, USA	96	21	1422	1	1405	2292	0	1405
Ca. Chlorobium antarcticum	Ga0364899_12464	Enriched cells from Trout Bog Lake Hypolimnion, Wisconsin, USA - BchlTB.July09.5000.02.C7	3300032777	Trout Bog Lake	Wisconsin, USA	96	161	1504	1	1343	2209	0	1345
Ca. Chlorobium antarcticum	Ga0364921_117602	Enriched cells from Trout Bog Lake Hypolimnion, Wisconsin, USA - BchlTB.June20.5000.01.D3	3300032859	Trout Bog Lake	Wisconsin, USA	96	1	795	1	794	1306	0	794
Ca. Chlorobium antarcticum	WSSedB1B2DRAFT_0024101	Wetland microbial communities from Twitchell Island in the Sacramento Delta, sample from surface sediment Feb2011 Site B1 Bulk	3300000077	Twitchell Island	California, USA	96	21	1118	1	1095	1764	0	1095
Ca. Chlorobium antarcticum	JGI20214J14112_10198621	Wetland sediment microbial communities from Twitchell Island in the Sacramento Delta, sample from surface sediment Aug2011 Site B2 Bulk	3300001279	Twitchell Island	California, USA	96	588	1422	1	835	1371	0	835
Ca. Chlorobium antarcticum	Ga0370488_001845_929_2429	Peat soil microbial communities from wetlands in Alaska, United States - Frozen_pond_04D_16	3300034691	untreated peat soil	Alaska, USA	96	3	1504	1	1501	2473	0	1501
Ca. Chlorobium antarcticum	Ga0370510_0009486_1444_2805	Peat soil microbial communities from wetlands in Alaska, United States - Frozen_pond_03S_18	3300034160	untreated peat soil	Alaska, USA	96	142	1504	1	1362	2250	0	1362
Ca. Chlorobium antarcticum	Ga0370487_0038848_176_1446	Peat soil microbial communities from wetlands in Alaska, United States - Frozen_pond_03D_16	3300034170	untreated peat soil	Alaska, USA	96	3	1273	1	1270	2030	0	1271
Ca. Chlorobium antarcticum	Ga0370502_0047995_1_991	Peat soil microbial communities from wetlands in Alaska, United States - Frozen_pond_01D_18	3300034156	untreated peat soil	Alaska, USA	96	3	981	1	979	1592	0	991
Ca. Chlorobium antarcticum	Ga0370509_0056158_357_1261	Peat soil microbial communities from wetlands in Alaska, United States - Frozen_pond_0210_18	3300034159	untreated peat soil	Alaska, USA	96	3	908	1	905	1489	0	905
Ca. Chlorobium antarcticum	Ga0370507_0063443_252_1128	Peat soil microbial communities from wetlands in Alaska, United States - Frozen_pond_06D_18	3300034158	untreated peat soil	Alaska, USA	96	3	879	1	877	1415	0	877
Ca. Chlorobium antarcticum	Ga0074648_10204134	Saline surface water microbial communities from Etoliko Lagoon, Greece - halocline_water	3300005512	Etoliko Lagoon	Greece	95	283	1505	1	1224	1916	0	1224
Ca. Chlorobium antarcticum	JGI11705J14877_100220861	Saline surface water microbial communities from Etoliko Lagoon, Greece - halocline water (15 m)	3300001419	Etoliko Lagoon	Greece	95	473	1417	1	946	1485	0	950
Ca. Chlorobium antarcticum	JGI997J19993_10032304	Saline benthic water microbial community from Etoliko Lagoon, Greece	3300001737	Etoliko Lagoon	Greece	95	478	1417	1	941	1476	0	945
Ca. Chlorobium antarcticum	Ga0209575_100056201	Freshwater pond sediment microbial communities from the University of Edinburgh, under environmental carbon perturbations - Medium cellulose week 11 (SPAdes)	3300027739	Lab Microcosm	Edinburgh, UK	95	2	955	2	955	1474	0	955
Ca. Chlorobium antarcticum	Ga0168060_1157071	Synthetic microbial communities for library methods comparison from University of Liverpool, United Kingdom - Mg49	3300029189	Lab-generated synthetic community	Liverpool, UK	95	302	1417	1	1116	1757	0	1116
Ca. Chlorobium antarcticum	le_00167170	2000 evening metatranscriptome	2209111012	Lake Grosse Fuchskuhle	Germany	95	21	908	1	887	1411	0	887
Ca. Chlorobium antarcticum	Ga0233420_100007879	Freshwater microbial communities from Lake Matano, South Sulawesi, Indonesia - Watercolumn_Matano_2014_102_MG	3300024300	Lake Matano	Indonesia	95	1	1505	1	1504	2396	0	1504
Ca. Chlorobium antarcticum	Ga0233421_100006236	Freshwater microbial communities from Lake Matano, South Sulawesi, Indonesia - Watercolumn_Matano_2014_107_MG	3300024341	Lake Matano	Indonesia	95	2	1505	2	1503	2355	0	1503
Ca. Chlorobium antarcticum	Ga0233422_1000044420	Freshwater microbial communities from Lake Matano, South Sulawesi, Indonesia - Watercolumn_Matano_2014_110_MG	3300024333	Lake Matano	Indonesia	95	2	1505	2	1503	2355	0	1503
Ca. Chlorobium antarcticum	M590M1_10000678	Microbial Communities from Little Sippewissett Salt Marsh, Woods Hole, MA that are anoxygenic and photosynthetic, Photosynthetic Consortia grown using light of 590nm sample 1	3300000470	Little Sippewissett salt marsh	Massachusetts, USA	95	21	1422	1	1402	2169	0	1402
Ca. Chlorobium antarcticum	M590M2_10000854	Microbial Communities from Little Sippewissett Salt Marsh, Woods Hole, MA that are anoxygenic and photosynthetic, Photosynthetic Consortia grown using light of 590nm sample 2	3300000502	Little Sippewissett salt marsh	Massachusetts, USA	95	21	1422	1	1402	2163	0	1402
Ca. Chlorobium antarcticum	Ga0272442_100000441	Marine sediment archaeal communities from Little Sippewissett salt marsh, Falmouth, MA, United States - SSM-Form-2O	3300030616	Little Sippewissett salt marsh	Massachusetts, USA	95	2	1246	2	1246	1978	0	1246
Ca. Chlorobium antarcticum	Ga0272444_100683204	Marine sediment archaeal communities from Little Sippewissett salt marsh, Falmouth, MA, United States - SSM-Form-13	3300031111	Little Sippewissett salt marsh	Massachusetts, USA	95	262	1505	1	1245	1982	0	1245
Ca. Chlorobium antarcticum	Ga0207193_13857701	Microbial communities from Manganika and McQuade lakes, Minnesota, USA Combined Assembly of Gp0225457, Gp0225456, Gp0225455, Gp0225454, Gp0225453, Gp0224915	3300020048	Manganika and McQuade lakes	Minnesota, USA	95	1	817	1	817	1299	0	817
Ca. Chlorobium antarcticum	Ga0326731_10019815	Lab enriched peat soil microbial communities from Michigan Hollow, Ithaca, NY, United States - MHF9FY SIP fraction	3300033502	Michigan Hollow	New York, USA	95	2	1505	2	1504	2338	0	1504
Ca. Chlorobium antarcticum	Ga0326725_0000018_73753_75255	Lab enriched peat soil microbial communities from Michigan Hollow, Ithaca, NY, United States - MHF13MY	3300035679	Michigan Hollow	New York, USA	95	3	1504	1	1503	2353	0	1503
Ca. Chlorobium antarcticum	Ga0326732_10098621	Lab enriched peat soil microbial communities from Michigan Hollow, Ithaca, NY, United States - MHF12FN SIP fraction	3300033501	Michigan Hollow	New York, USA	95	2	1406	2	1405	2183	0	1405
Ca. Chlorobium antarcticum	Ga0326726_104280231	Lab enriched peat soil microbial communities from Michigan Hollow, Ithaca, NY, United States - MHF15MN	3300033433	Michigan Hollow	New York, USA	95	262	1505	2	1245	1988	0	1245
Ca. Chlorobium antarcticum	Ga0326730_10067034	Lab enriched peat soil microbial communities from Michigan Hollow, Ithaca, NY, United States - MHF7AN SIP fraction	3300033500	Michigan Hollow	New York, USA	95	262	1505	2	1245	1988	0	1245
Ca. Chlorobium antarcticum	Ga0105107_100316662	Freshwater sediment microbial communities from Prairie Pothole Lake near Jamestown, North Dakota, USA - PPLs Lake P8 Core (1) Depth 19-21cm September2015	3300009087	Prairie Pothole Lake	North Dakota, USA	95	2	1505	2	1505	2357	0	1505
Ca. Chlorobium antarcticum	Ga0105100_101341671	Freshwater sediment microbial communities from Prairie Pothole Lake near Jamestown, North Dakota, USA - PPLs Lake P8 Core (1) Depth 10-12cm May2015	3300009166	Prairie Pothole Lake	North Dakota, USA	95	1	1091	1	1090	1692	0	1090
Ca. Chlorobium antarcticum	Ga0208288_10000726	Natural and restored wetland microbial communities from the San Francisco Bay, California, USA, that impact long-term carbon sequestration - MayberryNE_TuleB_D1 (SPAdes)	3300026039	San Francisco Bay	California, USA	95	2	1505	2	1505	2368	0	1505
Ca. Chlorobium antarcticum	Ga0075318_10002326	Natural and restored wetland microbial communities from the San Francisco Bay, California, USA, that impact long-term carbon sequestration - MayberryNE_TuleB_D2	3300014256	San Francisco Bay	California, USA	95	2	1505	2	1505	2374	0	1505
Ca. Chlorobium antarcticum	Ga0208145_10000531	Natural and restored wetland microbial communities from the San Francisco Bay, California, USA, that impact long-term carbon sequestration - MayberryNE_TuleB_D2 (SPAdes)	3300026043	San Francisco Bay	California, USA	95	2	1505	2	1505	2368	0	1505
Ca. Chlorobium antarcticum	Ga0075315_10286811	Natural and restored wetland microbial communities from the San Francisco Bay, California, USA, that impact long-term carbon sequestration - MayberryNE_TuleA_D1	3300014258	San Francisco Bay	California, USA	95	1	828	1	827	1312	0	827
Ca. Chlorobium antarcticum	Ga0187776_100138554	Tropical peat soil microbial communities from peatlands in Department of Meta, Colombia - 0216_BV02_MP12_20_MG	3300017966	tropical peatland	Colombia	95	2	1505	2	1506	2357	0	1506
Ca. Chlorobium antarcticum	Ga0074646_1000194	Saline benthic water microbial community from Etoliko Lagoon, Greece	3300005470	Etoliko Lagoon	Greece	94	2	1505	2	1506	2263	0	1506
Ca. Chlorobium antarcticum	Ga0172367_101644002	Freshwater microbial communities from Kabuno Bay, South-Kivu, Congo - kab_022012_10m	3300013126	Kabuno Bay	Congo	94	2	952	2	952	1424	0	952
Ca. Chlorobium antarcticum	Ga0080446_102312	Anoxygenic and phototrophic microbial communities from Little Sippewissett salt marsh, Woods Hole, MA - SCQ2a	3300005864	Little Sippewissett salt march	Massachusetts, USA	94	2	1505	2	1505	2279	0	1505
Ca. Chlorobium antarcticum	Ga0071009_1000282	Anoxygenic and phototrophic microbial communities from Little Sippewissett salt marsh, Woods Hole, MA - SCQ2a	3300004815	Little Sippewissett salt march	Massachusetts, USA	94	2	1505	2	1505	2279	0	1505
Ca. Chlorobium antarcticum	Ga0123253_10001564	Anoxygenic and phototrophic microbial communities from Little Sippewissett salt marsh, Woods Hole, MA - SCQ2a longer assembly SCB2a_77	3300009345	Little Sippewissett salt march	Massachusetts, USA	94	2	1505	2	1505	2279	0	1505
Ca. Chlorobium antarcticum	Ga0272441_100474234	Marine sediment archaeal communities from Little Sippewissett salt marsh, Falmouth, MA, United States - SSM-Prop-6N	3300028920	Little Sippewissett salt marsh	Massachusetts, USA	94	2	1505	2	1506	2246	0	1506
Ca. Chlorobium antarcticum	Ga0272443_100008984	Marine sediment archaeal communities from Little Sippewissett salt marsh, Falmouth, MA, United States - SSM-Acet-12	3300028883	Little Sippewissett salt marsh	Massachusetts, USA	94	2	1505	2	1505	2246	0	1505
Ca. Chlorobium antarcticum	Ga0272442_100736014	Marine sediment archaeal communities from Little Sippewissett salt marsh, Falmouth, MA, United States - SSM-Form-2O	3300030616	Little Sippewissett salt marsh	Massachusetts, USA	94	2	1505	2	1505	2274	0	1505
Ca. Chlorobium antarcticum	Ga0272442_100156977	Marine sediment archaeal communities from Little Sippewissett salt marsh, Falmouth, MA, United States - SSM-Form-2O	3300030616	Little Sippewissett salt marsh	Massachusetts, USA	94	2	1505	2	1505	2268	0	1505
Ca. Chlorobium antarcticum	Ga0272441_100398505	Marine sediment archaeal communities from Little Sippewissett salt marsh, Falmouth, MA, United States - SSM-Prop-6N	3300028920	Little Sippewissett salt marsh	Massachusetts, USA	94	2	1505	2	1505	2268	0	1505
Ca. Chlorobium antarcticum	Ga0272441_100094624	Marine sediment archaeal communities from Little Sippewissett salt marsh, Falmouth, MA, United States - SSM-Prop-6N	3300028920	Little Sippewissett salt marsh	Massachusetts, USA	94	2	1505	2	1505	2257	0	1505
Ca. Chlorobium antarcticum	Ga0126343_100851441	Coral microbial communities from Lord Howe Island, Old Settlement Bay, Australia - Cyphastrea 2 metagenome	3300010035	Lord Howe Island	Australia	94	2	1505	2	1506	2263	0	1506
Ca. Chlorobium antarcticum	Ga0126342_101227194	Coral microbial communities from Lord Howe Island, Old Settlement Bay, Australia - Cyphastrea 1 metagenome	3300010034	Lord Howe Island	Australia	94	382	1505	1	1125	1727	0	1125
Ca. Chlorobium antarcticum	Ga0209706_101060621	Freshwater sediment microbial communities from Prairie Pothole Lake near Jamestown, North Dakota, USA - PPLs Lake P8 Core (1) Depth 19-21cm September2015 (SPAdes)	3300027818	Prairie Pothole Lake	North Dakota, USA	94	2	1049	2	1049	1576	0	1049
Ca. Chlorobium antarcticum	Ga0071008_1004104	Marine anoxygenic phototrophic community SCB2a	3300004832	salt march pool in Falmouth	Massachusetts, USA	94	2	1505	2	1505	2279	0	1505
Ca. Chlorobium antarcticum	Ga0180433_100304055	Hypersaline lake sediment archaeal communities from the Salton Sea, California, USA - SS_1_D_1 metaG	3300018080	Salton Sea	California, USA	94	2	1505	2	1505	2246	0	1505
Ca. Chlorobium antarcticum	Ga0180434_100884232	Hypersaline lake sediment archaeal communities from the Salton Sea, California, USA - SS_1_D_2 metaG	3300017991	Salton Sea	California, USA	94	2	1505	2	1505	2246	0	1505
Ca. Chlorobium antarcticum	Ga0052836_1002052	Freshwater microbial communities from Blank Spring, California, USA - Blank Spring water - 6/17/14	3300003686	Blank Spring	California, USA	93	2	1505	2	1505	2218	0	1505
Ca. Chlorobium antarcticum	Ga0209614_10030504	Hot spring sediment bacterial and archeal communities from California, USA to study Microbial Dark Matter (Phase II) - Blank Spring sediment metaG (SPAdes)	3300025820	Blank Spring	California, USA	93	2	1505	2	1505	2207	0	1505
Ca. Chlorobium antarcticum	Ga0212126_10031074	Wilbur_combined assembly	3300022547	hot spring sediment	California, USA	93	2	1505	2	1505	2207	0	1505
Ca. Chlorobium antarcticum	MLSed_100491421	Benthic freshwater microbial communities from British Columbia, Canada	3300001533	lake sediments	Canada	93	21	1417	1	1397	2060	0	1401
Ca. Chlorobium antarcticum	Ga0302056_1050301	Marine microbial communities from Ace Lake, Antarctica - Site 228 with 0.8UM filter - spades	3300028227	Ace Lake	Antarctica	92	1	1225	1	1230	1740	0	1235
Ca. Chlorobium antarcticum	Ga0187775_100269471	Tropical peat soil microbial communities from peatlands in Department of Meta, Colombia - 0216_BV02_MP12_10_MG	3300017939	tropical peatland	Colombia	92	2	1233	2	1234	1733	0	1253
Ca. Chlorobium antarcticum	Ga0136459_1014181	Intertidal zone phototrophic microbial communities from Little Sippewissett Salt Marsh, Woods Hole, MA - SCB14c	3300010209	Little Sippewissett Salt Marsh	Massachusetts, USA	90	187	1504	9	1322	1727	0	1324
Ca. Chlorobium antarcticum	Ga0364921_108328	Enriched cells from Trout Bog Lake Hypolimnion, Wisconsin, USA - BchlTB.June20.5000.01.D3	3300032859	Trout Bog Lake	Wisconsin, USA	90	281	1505	3	1235	1616	0	1235
Ca. Chlorobium antarcticum	Ga0272446_1000096102	Hot spring microbial mat communities from Yellowstone National Park, WY, United States - YNP-CB-006-1	3300028735	hot spring, Yellowstone National Park	Wyoming, USA	87	2	1504	2	1497	1694	0	1499
Ca. Chlorobium antarcticum	Pfga_10989173	Hot springs microbial communities from Mammoth Hot Springs, Yellowstone National Park, Wyoming, USA-MHS Pond Facies_Gas lift	3300002920	Mammoth Hot Springs	Wyoming, USA	86	21	1417	1	1374	1506	0	1379
Ca. Chlorobium antarcticum	Ga0105046_100514056	Freshwater microbial communities from Lake Fryxell liftoff mats and glacier meltwater in Antarctica - MAT-03 (megahit assembly)	3300009084	Lake Fryxell	Antarctica	82	2	1504	2	1521	1301	0	1523
Ca. Chlorobium antarcticum	Ga0335394_100110594	Freshwater microbial communities from Lake Fryxell liftoff mats and glacier meltwater in Antarctica - MAT-03 (spades assembly)	3300032456	Lake Fryxell	Antarctica	82	2	1504	2	1521	1290	0	1523
Ca. Chlorobium antarcticum	Ga0163146_100258301	Freshwater microbial mat bacterial communities from Lake Vanda, McMurdo Dry Valleys, Antarctica - Oligotrophic Lake LV.19.MP7.G1	3300020219	Lake Vanda	Antarctica	82	2	1504	2	1521	1290	0	1523
A The Ca. Chlorobium antarcticum 16S rRNA gene (1505 bp length) was aligned to the 16S rRNA Public Assembled Metagenomes IMG database.
B The gene IDs of the 16S rRNA genes from IMG metagenome database that matched Ca. Chlorobium antarcticum 16S rRNA gene. The genes with 100% identity matches across 100% alignment fraction were from Ace Lake or Ellis Fjord, and are highlighted with a blue background. The Taynaya Bay metagenomes were probably not a part of the IMG public metagenomes, therefore matches to 16S rRNA genes from Taynay…
C The location from which the metagenome samples were collected.

## Sheet: 16S rRNA align - genomes
Query species nameA	Subject IMG Gene IDB	Subject genome nameC	IMG Genome ID	Identity (%)	Query Start	Query End	Subject Start	Subject End	Bit Score	E-value	Subject Length
Ca. Chlorobium antarcticum	640452573	Chlorobium phaeovibrioides DSM 265	640427130	99	10	1504	1	1494	2660	0	1494
Ca. Chlorobium antarcticum	2739439721	Chlorobi bacterium JGI_MCM14TBH012 (contamination screened)	2739367544	97	1	1505	1	1504	2512	0	1504
Ca. Chlorobium antarcticum	2739542765	Chlorobi bacterium JGI_MCM14TBH044 (contamination screened)	2739367637	97	1	1505	1	1504	2512	0	1504
Ca. Chlorobium antarcticum	2737668596	Chlorobi bacterium JGI_MCM14TBH085 (contamination screened)	2737471659	97	1	1505	1	1504	2512	0	1504
Ca. Chlorobium antarcticum	2737668603	Chlorobi bacterium JGI_MCM14TBH085 (contamination screened)	2737471659	97	1	1505	1	1504	2512	0	1504
Ca. Chlorobium antarcticum	2891046283	Chlorobium sp. BLA1	2891045655	97	3	1504	1	1501	2484	0	1501
Ca. Chlorobium antarcticum	2891046417	Chlorobium sp. BLA1	2891045655	97	3	1504	1	1501	2484	0	1501
Ca. Chlorobium antarcticum	2883979144	Chlorobium sp. N1	2883976897	97	3	1266	1	1263	2100	0	1263
Ca. Chlorobium antarcticum	640710300	Pelodictyon luteolum DSM 273	637000205	97	68	1431	1	1363	2302	0	1363
Ca. Chlorobium antarcticum	640710305	Pelodictyon luteolum DSM 273	637000205	97	65	1431	1	1364	2305	0	1364
Ca. Chlorobium antarcticum	2758576294	Unclassified chlorobium sp. NF	2758568002	97	1	1266	1	1265	2104	0	1265
Ca. Chlorobium antarcticum	639206092	Chlorobium ferrooxidans DSM 13031	638341060	96	10	1505	1	1495	2462	0	1495
Ca. Chlorobium antarcticum	642667730	Chlorobium limicola DSM 245	642555121	96	10	1504	1	1494	2444	0	1494
Ca. Chlorobium antarcticum	642667765	Chlorobium limicola DSM 245	642555121	96	10	1504	1	1494	2444	0	1494
Ca. Chlorobium antarcticum	2728698250	Chlorobium limicola Frasassi	2728368987	96	1	1505	1	1504	2468	0	1504
Ca. Chlorobium antarcticum	640720994	Chlorobium phaeobacteroides DSM 266	639633020	96	10	1504	1	1494	2416	0	1494
Ca. Chlorobium antarcticum	640720999	Chlorobium phaeobacteroides DSM 266	639633020	96	10	1504	1	1494	2416	0	1494
Ca. Chlorobium antarcticum	642726401	Pelodictyon phaeoclathratiforme BU-1	642555146	96	10	1504	1	1495	2457	0	1495
Ca. Chlorobium antarcticum	642726412	Pelodictyon phaeoclathratiforme BU-1	642555146	96	10	1504	1	1495	2457	0	1495
Ca. Chlorobium antarcticum	642727382	Pelodictyon phaeoclathratiforme BU-1	642555146	96	10	1504	1	1495	2451	0	1495
Ca. Chlorobium antarcticum	2706127580	unclassified Chlorobi bacterium bin2	2703719268	96	1	1504	1	1504	2468	0	1506
Ca. Chlorobium antarcticum	642718864	Chlorobaculum parvum DSM 263	642555120	95	10	1504	1	1495	2368	0	1495
Ca. Chlorobium antarcticum	642718734	Chlorobaculum parvum DSM 263	642555120	95	10	1504	1	1495	2368	0	1495
Ca. Chlorobium antarcticum	2882765459	Chlorobaculum sp. 24CR	2882762944	95	3	1504	1	1502	2398	0	1502
Ca. Chlorobium antarcticum	640710407	Chlorobium chlorochromatii CaD3	637000072	95	1	1505	2	1505	2374	0	1509
Ca. Chlorobium antarcticum	2501894854	Chlorobaculum limnaeum DSM 1677	2501846309	94	10	1499	1	1491	2226	0	1491
Ca. Chlorobium antarcticum	2511496712	Chlorobaculum limnaeum RK-j-1	2511231051	94	21	1419	1	1400	2080	0	1402
Ca. Chlorobium antarcticum	640694367	Chlorobaculum tepidum TLS	637000073	94	4	1452	1	1449	2172	0	1449
Ca. Chlorobium antarcticum	640694418	Chlorobaculum tepidum TLS	637000073	94	4	1452	1	1449	2172	0	1449
Ca. Chlorobium antarcticum	2752553244	Chlorobiales bacterium Clorobi_01	2751185570	94	2	1505	2	1505	2296	0	1505
Ca. Chlorobium antarcticum	642682668	Chlorobium phaeobacteroides BS1	642555122	94	10	1504	1	1495	2230	0	1495
Ca. Chlorobium antarcticum	642682642	Chlorobium phaeobacteroides BS1	642555122	94	10	1504	1	1495	2230	0	1495
Ca. Chlorobium antarcticum	642724129	Prosthecochloris aestuarii SK413, DSM 271	642555149	94	10	1504	1	1495	2257	0	1495
Ca. Chlorobium antarcticum	2839410144	Prosthecochloris marina V1	2839410141	94	3	1504	1	1503	2259	0	1503
Ca. Chlorobium antarcticum	2723113360	Prosthecochloris sp. CIB 2401	2721755577	94	2	1505	2	1506	2263	0	1506
Ca. Chlorobium antarcticum	2723113347	Prosthecochloris sp. CIB 2401	2721755577	94	2	1505	2	1506	2263	0	1506
Ca. Chlorobium antarcticum	2758494348	Prosthecochloris sp. GSB1	2757320899	94	2	1505	2	1506	2241	0	1506
Ca. Chlorobium antarcticum	2758494329	Prosthecochloris sp. GSB1	2757320899	94	2	1505	2	1506	2241	0	1506
Ca. Chlorobium antarcticum	2833421231	Prosthecochloris sp. ZM	2833419001	94	3	1504	1	1502	2276	0	1502
Ca. Chlorobium antarcticum	2752993761	Prosthecochloris sp. HL-GSB HL-130-GSB	2751185712	93	2	1505	2	1505	2224	0	1505
Ca. Chlorobium antarcticum	2752993768	Prosthecochloris sp. HL-GSB HL-130-GSB	2751185712	93	2	1505	2	1505	2224	0	1505
Ca. Chlorobium antarcticum	2833569173	Prosthecochloris sp. ZM_2	2833569056	93	3	1504	1	1501	2202	0	1501
Ca. Chlorobium antarcticum	642716649	Chloroherpeton thalassium ATCC 35110	642555123	90	10	1499	1	1480	1895	0	1480
Ca. Chlorobium antarcticum	2687738790	Dokdonella koreensis DS-123	2687453174	83	223	1388	223	1407	1018	0	1543
Ca. Chlorobium antarcticum	2687741455	Dokdonella koreensis DS-123	2687453174	83	223	1388	223	1407	1018	0	1543
Ca. Chlorobium antarcticum	2634113658	Ignavibacterium Spring_Unknown_43.3	2630969008	83	2	1504	2	1538	1317	0	1540
Ca. Chlorobium antarcticum	2861616402	Chiayiivirga flava DSM 24163	2861615426	82	222	1388	220	1405	987	0	1539
Ca. Chlorobium antarcticum	2861616518	Chiayiivirga flava DSM 24163	2861615426	82	222	1388	220	1405	987	0	1539
Ca. Chlorobium antarcticum	2517270461	Deferrisoma camini S3R1	2517093047	82	262	1388	252	1389	933	0	1423
Ca. Chlorobium antarcticum	2517273525	Deferrisoma camini S3R1	2517093047	82	262	1388	252	1389	933	0	1423
Ca. Chlorobium antarcticum	2716731036	Ignavibacteria bacterium RIFOXYC2_FULL_38_25	2713897425	82	2	1504	2	1538	1273	0	1540
Ca. Chlorobium antarcticum	2636157415	Ignavibacteria bacterium SCGC AD-253-K02 (unscreened)	2634166606	82	2	1504	2	1551	1223	0	1553
Ca. Chlorobium antarcticum	2695408671	Ignavibacteriales bacterium JGI CrystG Aug3-1-B21 (unscreened)	2693430051	82	2	1504	2	1544	1290	0	1546
Ca. Chlorobium antarcticum	2776230943	Luteimonas abyssi XH031	2775506892	82	222	1388	228	1413	992	0	1548
Ca. Chlorobium antarcticum	2776228350	Luteimonas abyssi XH031	2775506892	82	222	1388	228	1413	992	0	1548
Ca. Chlorobium antarcticum	2776231660	Luteimonas chenhongjianii 100111	2775506893	82	223	1388	229	1413	1002	0	1548
Ca. Chlorobium antarcticum	2776231439	Luteimonas chenhongjianii 100111	2775506893	82	223	1388	228	1412	1002	0	1547
Ca. Chlorobium antarcticum	2835205288	Luteimonas sp. 100069	2835205288	82	223	1388	227	1411	1002	0	1545
Ca. Chlorobium antarcticum	2839465692	Luteimonas sp. 4-12	2839465688	82	223	1388	227	1411	1002	0	1545
Ca. Chlorobium antarcticum	2523322897	Lysobacter sp. URHA0019	2523231029	82	239	1401	145	1326	957	0	1347
Ca. Chlorobium antarcticum	2667613101	Pseudomonas litoralis CECT 7670	2667527220	82	282	1388	282	1405	918	0	1541
Ca. Chlorobium antarcticum	2667613234	Pseudomonas litoralis CECT 7670	2667527220	82	282	1388	282	1405	918	0	1541
Ca. Chlorobium antarcticum	2554831436	Pseudomonas pelagia CL-AP6	2554235135	82	223	1388	203	1385	944	0	1419
Ca. Chlorobium antarcticum	2885783122	Pseudomonas pelagia Kongs-67	2885782434	82	266	1388	264	1403	942	0	1537
Ca. Chlorobium antarcticum	2885783252	Pseudomonas pelagia Kongs-67	2885782434	82	266	1388	264	1403	942	0	1537
Ca. Chlorobium antarcticum	2885783453	Pseudomonas pelagia Kongs-67	2885782434	82	266	1388	264	1403	937	0	1537
Ca. Chlorobium antarcticum	2752569652	Syntrophobacterales bacterium Delta_03	2751185577	82	214	1388	232	1425	979	0	1568
Ca. Chlorobium antarcticum	2894017606	Thermomonas brevis KACC 16975	2894015379	82	222	1388	226	1411	965	0	1545
Ca. Chlorobium antarcticum	2894017449	Thermomonas brevis KACC 16975	2894015379	82	222	1388	226	1411	965	0	1545
Ca. Chlorobium antarcticum	2814202431	unclassified Chloroflexi BinDm5	2814122925	82	2	1504	2	1538	1245	0	1540
Ca. Chlorobium antarcticum	2771998894	unclassified Ignavibacteriales BinDG074mb26	2770939610	82	2	1504	2	1538	1267	0	1540
Ca. Chlorobium antarcticum	2508715809	Beggiatoa alba B18LD	2508501047	81	223	1388	196	1377	928	0	1411
Ca. Chlorobium antarcticum	2790553020	Beggiatoa leptomitoformis D-401	2788500402	81	223	1388	216	1397	911	0	1532
Ca. Chlorobium antarcticum	2790553624	Beggiatoa leptomitoformis D-401	2788500402	81	223	1388	216	1397	911	0	1532
Ca. Chlorobium antarcticum	2656600885	Beggiatoa leptomitoformis D-402	2654588010	81	223	1388	216	1397	911	0	1532
Ca. Chlorobium antarcticum	2656601481	Beggiatoa leptomitoformis D-402	2654588010	81	223	1388	216	1397	911	0	1532
Ca. Chlorobium antarcticum	2568525511	Deefgea rivuli DSM 18356	2556921014	81	239	1388	221	1384	885	0	1415
Ca. Chlorobium antarcticum	2558086645	Desulfovermiculus halophilus DSM 18834	2556921618	81	235	1388	46	1219	893	0	1253
Ca. Chlorobium antarcticum	2884007533	Jeotgalibacillus sp. S-D1	2884007510	81	222	1388	220	1402	885	0	1535
Ca. Chlorobium antarcticum	2896314934	Lysobacter sp. Alg18-2.2	2896314579	81	239	1504	243	1545	976	0	1545
Ca. Chlorobium antarcticum	650410429	Marinobacter adhaerens HP15	650377991	81	222	1388	217	1399	885	0	1532
Ca. Chlorobium antarcticum	650409518	Marinobacter adhaerens HP15	650377991	81	222	1388	217	1399	885	0	1532
Ca. Chlorobium antarcticum	650409707	Marinobacter adhaerens HP15	650377991	81	222	1388	217	1399	885	0	1532
Ca. Chlorobium antarcticum	641148726	Marinobacter algicola DG893	640963027	81	222	1388	223	1405	907	0	1539
Ca. Chlorobium antarcticum	2902009954	Marinobacter confluentis HJM-18	2902008790	81	222	1388	220	1402	913	0	1536
Ca. Chlorobium antarcticum	2899464475	Marinobacter confluentis KCTC 42705	2899460962	81	222	1388	220	1402	913	0	1536
Ca. Chlorobium antarcticum	2899484093	Marinobacter halotolerans NBRC 110910	2899480561	81	222	1388	220	1402	907	0	1536
Ca. Chlorobium antarcticum	2515472500	Marinobacter lipolyticus BF04_CF-4	2515154082	81	223	1388	221	1403	878	0	1437
Ca. Chlorobium antarcticum	2514541595	Marinobacter manganoxydans MnI7-9	2513237337	81	222	1388	133	1315	880	0	1449
Ca. Chlorobium antarcticum	2843218422	Marinobacter salarius HL2708#2	2843218271	81	222	1388	224	1406	896	0	1540
Ca. Chlorobium antarcticum	2843219083	Marinobacter salarius HL2708#2	2843218271	81	222	1388	224	1406	896	0	1540
Ca. Chlorobium antarcticum	2843219282	Marinobacter salarius HL2708#2	2843218271	81	222	1388	224	1406	896	0	1540
Ca. Chlorobium antarcticum	2688337140	Marinobacter salarius R9SW1	2687453324	81	222	1388	226	1407	894	0	1541
Ca. Chlorobium antarcticum	2774577070	Marinobacter salarius SMR5	2773857798	81	222	1388	226	1408	902	0	1542
Ca. Chlorobium antarcticum	2774576364	Marinobacter salarius SMR5	2773857798	81	222	1388	226	1408	902	0	1542
Ca. Chlorobium antarcticum	2774576167	Marinobacter salarius SMR5	2773857798	81	222	1388	226	1408	896	0	1542
Ca. Chlorobium antarcticum	2719495725	Marinobacter salinus Hb8	2718217953	81	222	1388	226	1408	907	0	1542
Ca. Chlorobium antarcticum	2719496421	Marinobacter salinus Hb8	2718217953	81	222	1388	226	1408	907	0	1542
Ca. Chlorobium antarcticum	2719495539	Marinobacter salinus Hb8	2718217953	81	222	1388	226	1408	907	0	1542
Ca. Chlorobium antarcticum	2902026866	Marinobacter salsuginis 5N-3	2902023017	81	222	1388	224	1406	907	0	1540
Ca. Chlorobium antarcticum	2902000025	Marinobacter salsuginis NBRC 109114	2901995624	81	222	1388	224	1406	907	0	1540
Ca. Chlorobium antarcticum	2516838276	Marinobacter salsuginis SD-14B	2516653033	81	222	1388	206	1388	907	0	1422
Ca. Chlorobium antarcticum	2668604874	Marinobacter similis A3d10	2667527567	81	222	1388	226	1408	885	0	1542
Ca. Chlorobium antarcticum	2785629073	Marinobacter sp. 3-2	2785510723	81	222	1388	226	1408	885	0	1542
Ca. Chlorobium antarcticum	2518887143	Marinobacter sp. BSs20148	2518645575	81	223	1388	218	1400	878	0	1529
Ca. Chlorobium antarcticum	2518887817	Marinobacter sp. BSs20148	2518645575	81	223	1388	218	1400	878	0	1529
Ca. Chlorobium antarcticum	2518886982	Marinobacter sp. BSs20148	2518645575	81	223	1388	218	1400	878	0	1529
Ca. Chlorobium antarcticum	2901991627	Marinobacter sp. BW6	2901991622	81	222	1388	224	1406	880	0	1540
Ca. Chlorobium antarcticum	2902003612	Marinobacter sp. C18	2902000069	81	222	1388	224	1406	896	0	1540
Ca. Chlorobium antarcticum	2641791950	Marinobacter sp. CP1	2639763052	81	222	1388	226	1408	885	0	1542
Ca. Chlorobium antarcticum	2641791712	Marinobacter sp. CP1	2639763052	81	222	1388	226	1408	885	0	1542
Ca. Chlorobium antarcticum	2641792589	Marinobacter sp. CP1	2639763052	81	222	1388	226	1408	885	0	1542
Ca. Chlorobium antarcticum	2620092416	Marinobacter sp. DSM 26291	2619618959	81	222	1388	37	1219	896	0	1353
Ca. Chlorobium antarcticum	2899488246	Marinobacter sp. EC-HK377 MBHK15	2899488209	81	222	1388	224	1406	896	0	1540
Ca. Chlorobium antarcticum	2885110023	Marinobacter sp. EhC06	2885107977	81	222	1388	224	1406	880	0	1540
Ca. Chlorobium antarcticum	2885116496	Marinobacter sp. EhN04	2885112303	81	222	1388	224	1406	880	0	1540
Ca. Chlorobium antarcticum	640633783	Marinobacter sp. ELB17	640612205	81	223	1388	238	1420	878	0	1554
Ca. Chlorobium antarcticum	2609946138	Marinobacter sp. ES.042	2609459767	81	222	1388	226	1408	891	0	1542
Ca. Chlorobium antarcticum	2609945953	Marinobacter sp. ES.042	2609459767	81	222	1388	226	1408	891	0	1542
Ca. Chlorobium antarcticum	2609945360	Marinobacter sp. ES.042	2609459767	81	222	1388	226	1408	891	0	1542
Ca. Chlorobium antarcticum	2609933243	Marinobacter sp. ES.048	2609459764	81	222	1388	226	1408	885	0	1542
Ca. Chlorobium antarcticum	2609933973	Marinobacter sp. ES.048	2609459764	81	222	1388	226	1408	885	0	1542
Ca. Chlorobium antarcticum	2609933787	Marinobacter sp. ES.048	2609459764	81	222	1388	226	1408	885	0	1542
Ca. Chlorobium antarcticum	2563451951	Marinobacter sp. HL-58	2563366518	81	222	1388	206	1388	941	0	1422
Ca. Chlorobium antarcticum	2563451741	Marinobacter sp. HL-58	2563366518	81	222	1388	206	1388	941	0	1422
Ca. Chlorobium antarcticum	2563452616	Marinobacter sp. HL-58	2563366518	81	222	1388	206	1388	941	0	1422
Ca. Chlorobium antarcticum	2616728550	Marinobacter sp. LV10MA510-1	2616644829	81	223	1388	237	1419	878	0	1553
Ca. Chlorobium antarcticum	2616730630	Marinobacter sp. LV10MA510-1	2616644829	81	223	1388	237	1419	878	0	1553
Ca. Chlorobium antarcticum	2616730469	Marinobacter sp. LV10MA510-1	2616644829	81	223	1388	237	1419	878	0	1553
Ca. Chlorobium antarcticum	2616426646	Marinobacter sp. LV10R520-4	2615840649	81	223	1388	237	1419	878	0	1553
Ca. Chlorobium antarcticum	2616428831	Marinobacter sp. LV10R520-4	2615840649	81	223	1388	237	1419	878	0	1553
Ca. Chlorobium antarcticum	2574474689	Marinobacter sp. MCTG268	2574179780	81	222	1388	206	1388	902	0	1422
Ca. Chlorobium antarcticum	2574473169	Marinobacter sp. MCTG268	2574179780	81	222	1388	206	1388	902	0	1422
Ca. Chlorobium antarcticum	2574473379	Marinobacter sp. MCTG268	2574179780	81	222	1388	206	1388	902	0	1422
Ca. Chlorobium antarcticum	2899488199	Marinobacter sp. PJ-16	2899484102	81	222	1388	224	1406	907	0	1540
Ca. Chlorobium antarcticum	2754384041	Marinobacter sp. PT19DW	2751186041	81	222	1388	226	1408	885	0	1542
Ca. Chlorobium antarcticum	2651126799	Marinobacter subterrani JG233	2648501751	81	222	1388	226	1408	880	0	1542
Ca. Chlorobium antarcticum	2651130829	Marinobacter subterrani JG233	2648501751	81	222	1388	226	1408	880	0	1542
Ca. Chlorobium antarcticum	2651130641	Marinobacter subterrani JG233	2648501751	81	222	1388	226	1408	880	0	1542
Ca. Chlorobium antarcticum	2744027287	Methylophaga sp. SM14	2740892603	81	223	1388	229	1410	894	0	1545
Ca. Chlorobium antarcticum	2880944255	Methylophaga sp. SM14	2880941384	81	223	1388	227	1408	894	0	1541
Ca. Chlorobium antarcticum	2902295907	Moraxella atlantae CCUG 6415	2902295020	81	283	1401	275	1409	880	0	1528
Ca. Chlorobium antarcticum	2902295908	Moraxella atlantae CCUG 6415	2902295020	81	283	1401	275	1409	869	0	1437
Ca. Chlorobium antarcticum	2732550059	Moraxella atlantae NBRC 14588	2731957643	81	283	1401	277	1411	880	0	1530
Ca. Chlorobium antarcticum	2902272443	Moraxella atlantae NCTC 11091	2902272189	81	283	1401	275	1409	880	0	1528
Ca. Chlorobium antarcticum	2902272427	Moraxella atlantae NCTC 11091	2902272189	81	283	1401	275	1409	880	0	1528
Ca. Chlorobium antarcticum	2902274060	Moraxella atlantae NCTC 11091	2902272189	81	283	1401	275	1409	869	0	1528
Ca. Chlorobium antarcticum	2902273144	Moraxella atlantae NCTC 11091	2902272189	81	283	1401	275	1409	869	0	1528
Ca. Chlorobium antarcticum	2831664515	Oceanicoccus sp. KOV_DT_Chl	2831663674	81	239	1388	227	1389	883	0	1523
Ca. Chlorobium antarcticum	2600801753	Pseudomonas alcaligenes NBRC 14159	2600255064	81	223	1388	223	1405	894	0	1541
Ca. Chlorobium antarcticum	2688807332	Pseudomonas alcaligenes NEB 585	2687453443	81	223	1388	223	1405	894	0	1541
Ca. Chlorobium antarcticum	2688810146	Pseudomonas alcaligenes NEB 585	2687453443	81	223	1388	223	1405	894	0	1541
Ca. Chlorobium antarcticum	2688808824	Pseudomonas alcaligenes NEB 585	2687453443	81	223	1388	223	1405	894	0	1541
Ca. Chlorobium antarcticum	2708879549	Pseudomonas alcaligenes RU36E	2708742420	81	223	1388	223	1405	894	0	1541
Ca. Chlorobium antarcticum	2708879554	Pseudomonas alcaligenes RU36E	2708742420	81	223	1388	223	1405	894	0	1541
Ca. Chlorobium antarcticum	2710261095	Pseudomonas alcaligenes RU38D	2708743161	81	223	1388	223	1405	894	0	1541
Ca. Chlorobium antarcticum	2651370401	Pseudomonas balearica DSM 6083	2648501814	81	223	1388	223	1405	917	0	1541
Ca. Chlorobium antarcticum	2651371921	Pseudomonas balearica DSM 6083	2648501814	81	223	1388	223	1405	911	0	1541
Ca. Chlorobium antarcticum	2651369281	Pseudomonas balearica DSM 6083	2648501814	81	223	1388	223	1405	911	0	1541
Ca. Chlorobium antarcticum	2651369898	Pseudomonas balearica DSM 6083	2648501814	81	223	1388	223	1407	902	0	1543
Ca. Chlorobium antarcticum	2814838333	Pseudomonas balearica KF707	2814123110	81	223	1388	223	1404	889	0	1540
Ca. Chlorobium antarcticum	2814833914	Pseudomonas balearica KF707	2814123110	81	223	1388	223	1405	894	0	1541
Ca. Chlorobium antarcticum	2814835539	Pseudomonas balearica KF707	2814123110	81	223	1388	223	1405	894	0	1541
Ca. Chlorobium antarcticum	2814833478	Pseudomonas balearica KF707	2814123110	81	223	1388	223	1405	894	0	1541
Ca. Chlorobium antarcticum	2814833473	Pseudomonas balearica KF707	2814123110	81	223	1388	223	1405	894	0	1541
Ca. Chlorobium antarcticum	2729143820	Pseudomonas balearica LS401	2728369096	81	223	1388	223	1405	917	0	1541
Ca. Chlorobium antarcticum	2729147977	Pseudomonas balearica st101	2728369097	81	223	1388	223	1405	900	0	1541
Ca. Chlorobium antarcticum	2619824144	Pseudomonas bauzanensis CGMCC 1.9095	2619618872	81	223	1388	223	1405	917	0	1541
Ca. Chlorobium antarcticum	2671548639	Pseudomonas bauzanensis LMG 26048	2671180106	81	223	1388	223	1405	917	0	1541
Ca. Chlorobium antarcticum	2576115601	Pseudomonas bauzanensis W13Z2	2574180242	81	223	1388	220	1402	911	0	1538
Ca. Chlorobium antarcticum	2576118714	Pseudomonas bauzanensis W13Z2	2574180242	81	223	1388	220	1402	911	0	1538
Ca. Chlorobium antarcticum	2576112168	Pseudomonas bauzanensis W13Z2	2574180242	81	223	1388	220	1402	911	0	1538
Ca. Chlorobium antarcticum	2719408356	Pseudomonas citronellolis SJTE-3	2718217932	81	223	1388	221	1400	881	0	1535
Ca. Chlorobium antarcticum	2719409719	Pseudomonas citronellolis SJTE-3	2718217932	81	223	1388	223	1405	883	0	1541
Ca. Chlorobium antarcticum	2719410605	Pseudomonas citronellolis SJTE-3	2718217932	81	223	1388	223	1405	883	0	1541
Ca. Chlorobium antarcticum	2665831599	Pseudomonas citronellolis TTU2014-008ASC	2663763146	81	223	1388	223	1405	883	0	1541
Ca. Chlorobium antarcticum	2663130116	Pseudomonas citronellolis TTU2014-011ASC	2660238621	81	223	1388	223	1405	883	0	1541
Ca. Chlorobium antarcticum	2667497714	Pseudomonas cuatrocienegasensis LMG 24676	2663763600	81	223	1388	90	1272	900	0	1408
Ca. Chlorobium antarcticum	2540741099	Pseudomonas denitrificans ATCC 13867	2540341139	81	223	1388	223	1405	900	0	1539
Ca. Chlorobium antarcticum	2540737419	Pseudomonas denitrificans ATCC 13867	2540341139	81	223	1388	223	1405	900	0	1539
Ca. Chlorobium antarcticum	2540741818	Pseudomonas denitrificans ATCC 13867	2540341139	81	223	1388	223	1405	900	0	1539
Ca. Chlorobium antarcticum	2540739293	Pseudomonas denitrificans ATCC 13867	2540341139	81	223	1388	223	1405	900	0	1539
Ca. Chlorobium antarcticum	2540738825	Pseudomonas denitrificans ATCC 13867	2540341139	81	223	1388	223	1405	900	0	1539
Ca. Chlorobium antarcticum	2629234376	Pseudomonas flexibilis ATCC 29606	2627853852	81	214	1388	212	1405	913	0	1541
Ca. Chlorobium antarcticum	2731436098	Pseudomonas flexibilis JCM 14085	2728369709	81	214	1388	211	1402	900	0	1538
Ca. Chlorobium antarcticum	2648137740	Pseudomonas flexibilis JCM 14085	2645728058	81	214	1388	212	1405	913	0	1541
Ca. Chlorobium antarcticum	2794752240	Pseudomonas fluvialis ASS-1	2791355545	81	223	1388	223	1405	922	0	1541
Ca. Chlorobium antarcticum	2532700127	Pseudomonas furukawaii KF707	2531839224	81	223	1388	221	1403	894	0	1537
Ca. Chlorobium antarcticum	2532701848	Pseudomonas furukawaii KF707	2531839224	81	223	1388	221	1403	894	0	1537
Ca. Chlorobium antarcticum	2532700132	Pseudomonas furukawaii KF707	2531839224	81	223	1388	221	1403	894	0	1537
Ca. Chlorobium antarcticum	2532698763	Pseudomonas furukawaii KF707	2531839224	81	223	1388	221	1403	894	0	1537
Ca. Chlorobium antarcticum	2532701506	Pseudomonas furukawaii KF707	2531839224	81	223	1388	221	1403	894	0	1537
Ca. Chlorobium antarcticum	2532700039	Pseudomonas furukawaii KF707	2531839224	81	223	1388	221	1403	894	0	1537
Ca. Chlorobium antarcticum	2532700064	Pseudomonas furukawaii KF707	2531839224	81	223	1388	221	1403	894	0	1537
Ca. Chlorobium antarcticum	2532696965	Pseudomonas furukawaii KF707	2531839224	81	223	1388	221	1403	894	0	1537
Ca. Chlorobium antarcticum	2532699994	Pseudomonas furukawaii KF707	2531839224	81	223	1388	221	1403	894	0	1537
Ca. Chlorobium antarcticum	2664315884	Pseudomonas jinjuensis JCM 21621	2663762768	81	223	1388	223	1405	894	0	1541
Ca. Chlorobium antarcticum	2667609484	Pseudomonas litoralis CECT 7670	2667527220	81	223	1388	223	1405	917	0	1541
Ca. Chlorobium antarcticum	2667610682	Pseudomonas litoralis CECT 7670	2667527220	81	223	1388	223	1405	917	0	1541
Ca. Chlorobium antarcticum	2830791752	Pseudomonas mendocina 2.2	2830786439	81	223	1388	221	1403	889	0	1537
Ca. Chlorobium antarcticum	2856511859	Pseudomonas mendocina B2U3D	2856510208	81	223	1388	221	1403	894	0	1537
Ca. Chlorobium antarcticum	2856512348	Pseudomonas mendocina B2U3D	2856510208	81	223	1388	221	1403	894	0	1537
Ca. Chlorobium antarcticum	2856510419	Pseudomonas mendocina B2U3D	2856510208	81	223	1388	221	1403	894	0	1537
Ca. Chlorobium antarcticum	2856511426	Pseudomonas mendocina B2U3D	2856510208	81	223	1388	221	1403	894	0	1537
Ca. Chlorobium antarcticum	2880207568	Pseudomonas mendocina NEB698	2880206526	81	223	1388	221	1403	900	0	1537
Ca. Chlorobium antarcticum	2880211805	Pseudomonas mendocina NEB698	2880206526	81	223	1388	221	1403	900	0	1537
Ca. Chlorobium antarcticum	2880208873	Pseudomonas mendocina NEB698	2880206526	81	223	1388	221	1403	900	0	1537
Ca. Chlorobium antarcticum	2880209389	Pseudomonas mendocina NEB698	2880206526	81	223	1388	221	1403	900	0	1537
Ca. Chlorobium antarcticum	2770423548	Pseudomonas oleovorans AG1002	2767802492	81	223	1388	223	1405	900	0	1541
Ca. Chlorobium antarcticum	2770411796	Pseudomonas oleovorans E1205	2767802489	81	223	1388	223	1405	894	0	1541
Ca. Chlorobium antarcticum	2510313654	Pseudomonas oleovorans MOIL14HWK12	2510065058	81	223	1388	142	1324	900	0	1358
Ca. Chlorobium antarcticum	2677188812	Pseudomonas oryzihabitans H72	2675903237	81	223	1388	223	1405	894	0	1541
Ca. Chlorobium antarcticum	2586186699	Pseudomonas oryzihabitans NBRC 102199	2585427682	81	223	1388	203	1385	900	0	1419
Ca. Chlorobium antarcticum	2652252057	Pseudomonas oryzihabitans RIT370	2651869647	81	223	1388	223	1405	900	0	1541
Ca. Chlorobium antarcticum	2674714281	Pseudomonas oryzihabitans USDA-ARS-USMARC-56511	2671180913	81	223	1388	223	1405	894	0	1541
Ca. Chlorobium antarcticum	2674714678	Pseudomonas oryzihabitans USDA-ARS-USMARC-56511	2671180913	81	223	1388	223	1405	894	0	1541
Ca. Chlorobium antarcticum	2674715828	Pseudomonas oryzihabitans USDA-ARS-USMARC-56511	2671180913	81	223	1388	223	1405	894	0	1541
Ca. Chlorobium antarcticum	2674717205	Pseudomonas oryzihabitans USDA-ARS-USMARC-56511	2671180913	81	223	1388	223	1405	894	0	1541
Ca. Chlorobium antarcticum	2674714210	Pseudomonas oryzihabitans USDA-ARS-USMARC-56511	2671180913	81	223	1388	223	1405	894	0	1541
Ca. Chlorobium antarcticum	2708484477	Pseudomonas panipatensis Esp-1	2706794920	81	223	1388	223	1405	900	0	1541
Ca. Chlorobium antarcticum	2664324271	Pseudomonas panipatensis LMG 24738	2663762770	81	223	1388	145	1327	900	0	1463
Ca. Chlorobium antarcticum	2514329371	Pseudomonas psychrotolerans L19	2513237276	81	223	1388	220	1402	900	0	1536
Ca. Chlorobium antarcticum	2667503177	Pseudomonas psychrotolerans LMG 21977	2663763601	81	223	1388	223	1405	900	0	1541
Ca. Chlorobium antarcticum	2733732681	Pseudomonas psychrotolerans NS337	2731957910	81	223	1388	223	1405	900	0	1541
Ca. Chlorobium antarcticum	2733740037	Pseudomonas psychrotolerans NS376	2731957911	81	222	1388	222	1405	891	0	1541
Ca. Chlorobium antarcticum	2808397939	Pseudomonas resinovorans MO-1	2806311007	81	223	1388	223	1405	900	0	1541
Ca. Chlorobium antarcticum	2562413470	Pseudomonas resinovorans NBRC 106553	2561511189	81	223	1388	220	1402	905	0	1536
Ca. Chlorobium antarcticum	2562417825	Pseudomonas resinovorans NBRC 106553	2561511189	81	223	1388	220	1402	905	0	1536
Ca. Chlorobium antarcticum	2562417820	Pseudomonas resinovorans NBRC 106553	2561511189	81	223	1388	220	1402	905	0	1536
Ca. Chlorobium antarcticum	2562416554	Pseudomonas resinovorans NBRC 106553	2561511189	81	223	1388	220	1402	905	0	1536
Ca. Chlorobium antarcticum	2562413006	Pseudomonas resinovorans NBRC 106553	2561511189	81	223	1388	220	1402	905	0	1536
Ca. Chlorobium antarcticum	2667947381	Pseudomonas salegens CECT 8338	2667527386	81	282	1388	282	1405	896	0	1541
Ca. Chlorobium antarcticum	2667947507	Pseudomonas salegens CECT 8338	2667527386	81	282	1388	282	1405	896	0	1541
Ca. Chlorobium antarcticum	2667950181	Pseudomonas salegens CECT 8338	2667527386	81	282	1388	282	1405	896	0	1541
Ca. Chlorobium antarcticum	2774132713	Pseudomonas sp. 1766	2773857672	81	223	1388	223	1405	894	0	1541
Ca. Chlorobium antarcticum	2743564246	Pseudomonas sp. 21	2740892462	81	223	1388	223	1405	900	0	1541
Ca. Chlorobium antarcticum	2618648145	Pseudomonas sp. AAC	2617271062	81	282	1388	13	1136	880	0	1272
Ca. Chlorobium antarcticum	2618643876	Pseudomonas sp. AAC	2617271062	81	223	1388	223	1405	883	0	1541
Ca. Chlorobium antarcticum	2823695046	Pseudomonas sp. AS2.8	2823690506	81	223	1388	221	1403	900	0	1444
Ca. Chlorobium antarcticum	2725828115	Pseudomonas sp. BMS12	2724679196	81	223	1388	223	1405	889	0	1541
Ca. Chlorobium antarcticum	2860884825	Pseudomonas sp. DY-1 DY-1	2860879904	81	223	1388	221	1402	894	0	1536
Ca. Chlorobium antarcticum	2860880533	Pseudomonas sp. DY-1 DY-1	2860879904	81	223	1388	221	1403	894	0	1537
Ca. Chlorobium antarcticum	2860883841	Pseudomonas sp. DY-1 DY-1	2860879904	81	223	1388	221	1403	894	0	1537
Ca. Chlorobium antarcticum	2860884820	Pseudomonas sp. DY-1 DY-1	2860879904	81	223	1388	221	1403	894	0	1537
Ca. Chlorobium antarcticum	2860883343	Pseudomonas sp. DY-1 DY-1	2860879904	81	223	1388	221	1403	894	0	1537
Ca. Chlorobium antarcticum	2769533137	Pseudomonas sp. EGD-AKN5	2767802272	81	223	1388	223	1405	883	0	1541
Ca. Chlorobium antarcticum	2729002677	Pseudomonas sp. EpSL25	2728369069	81	223	1388	223	1405	883	0	1541
Ca. Chlorobium antarcticum	2785242641	Pseudomonas sp. JUb52	2784746740	81	223	1388	223	1405	900	0	1541
Ca. Chlorobium antarcticum	2563003599	Pseudomonas sp. M1	2562617102	81	223	1388	221	1403	883	0	1551
Ca. Chlorobium antarcticum	2510285505	Pseudomonas sp. MOIL14HWK12:I1	2510065053	81	223	1388	113	1295	900	0	1329
Ca. Chlorobium antarcticum	2510296087	Pseudomonas sp. MOIL14HWK12:I2	2510065055	81	223	1388	145	1327	900	0	1361
Ca. Chlorobium antarcticum	2663029459	Pseudomonas sp. NBRC 111135	2660238598	81	223	1388	223	1405	900	0	1541
Ca. Chlorobium antarcticum	2849865986	Pseudomonas sp. R2A2	2849863654	81	223	1388	221	1403	889	0	1537
Ca. Chlorobium antarcticum	2849865266	Pseudomonas sp. R2A2	2849863654	81	223	1388	221	1403	889	0	1537
Ca. Chlorobium antarcticum	2849866870	Pseudomonas sp. R2A2	2849863654	81	223	1388	221	1403	889	0	1537
Ca. Chlorobium antarcticum	2849864138	Pseudomonas sp. R2A2	2849863654	81	223	1388	221	1403	889	0	1537
Ca. Chlorobium antarcticum	2808907789	Pseudomonas sp. SLBN-2	2808606373	81	223	1388	223	1405	894	0	1541
Ca. Chlorobium antarcticum	2808906432	Pseudomonas sp. SLBN-2	2808606373	81	223	1388	223	1405	894	0	1541
Ca. Chlorobium antarcticum	2808906427	Pseudomonas sp. SLBN-2	2808606373	81	223	1388	223	1405	894	0	1541
Ca. Chlorobium antarcticum	2808905118	Pseudomonas sp. SLBN-2	2808606373	81	223	1388	223	1405	894	0	1541
Ca. Chlorobium antarcticum	2730116252	Pseudomonas sp. TCU-HL1	2728369353	81	223	1388	223	1405	911	0	1541
Ca. Chlorobium antarcticum	2730114745	Pseudomonas sp. TCU-HL1	2728369353	81	223	1388	223	1405	911	0	1541
Ca. Chlorobium antarcticum	2730115807	Pseudomonas sp. TCU-HL1	2728369353	81	223	1388	223	1405	911	0	1541
Ca. Chlorobium antarcticum	2730111941	Pseudomonas sp. TCU-HL1	2728369353	81	223	1388	223	1405	911	0	1541
Ca. Chlorobium antarcticum	2730111347	Pseudomonas sp. TCU-HL1	2728369353	81	223	1388	223	1405	911	0	1541
Ca. Chlorobium antarcticum	2908484010	Pseudomonas stutzeri 1W1-1A	2908481967	81	223	1388	221	1403	889	0	1536
Ca. Chlorobium antarcticum	2908485971	Pseudomonas stutzeri 1W1-1A	2908481967	81	223	1388	221	1403	889	0	1536
Ca. Chlorobium antarcticum	2908485254	Pseudomonas stutzeri 1W1-1A	2908481967	81	223	1388	221	1403	889	0	1537
Ca. Chlorobium antarcticum	2908482446	Pseudomonas stutzeri 1W1-1A	2908481967	81	223	1388	221	1403	889	0	1537
Ca. Chlorobium antarcticum	2808544493	Pseudomonas stutzeri AK6	2806311050	81	223	1388	218	1400	889	0	1535
Ca. Chlorobium antarcticum	651020355	Pseudomonas stutzeri CGMCC 1.1803	650716077	81	223	1388	221	1403	894	0	1549
Ca. Chlorobium antarcticum	651021474	Pseudomonas stutzeri CGMCC 1.1803	650716077	81	223	1388	221	1403	894	0	1549
Ca. Chlorobium antarcticum	2742118190	Pseudomonas stutzeri HI00D01	2740892126	81	223	1388	223	1405	889	0	1541
Ca. Chlorobium antarcticum	2875532768	Pseudomonas stutzeri NCTC10450	2875531041	81	223	1388	221	1403	889	0	1537
Ca. Chlorobium antarcticum	2875534594	Pseudomonas stutzeri NCTC10450	2875531041	81	223	1388	221	1403	889	0	1537
Ca. Chlorobium antarcticum	2875531986	Pseudomonas stutzeri NCTC10450	2875531041	81	223	1388	221	1403	889	0	1537
Ca. Chlorobium antarcticum	2875533408	Pseudomonas stutzeri NCTC10450	2875531041	81	223	1388	221	1403	889	0	1537
Ca. Chlorobium antarcticum	2539727316	Pseudomonas stutzeri NF13	2537562078	81	223	1388	223	1405	894	0	1539
Ca. Chlorobium antarcticum	2649631116	Pseudomonas stutzeri NT0128	2648501367	81	223	1388	223	1405	889	0	1541
Ca. Chlorobium antarcticum	2649633427	Pseudomonas stutzeri NT0128	2648501367	81	223	1388	223	1405	889	0	1541
Ca. Chlorobium antarcticum	2649633604	Pseudomonas stutzeri NT0128	2648501367	81	223	1388	223	1405	889	0	1541
Ca. Chlorobium antarcticum	2649634505	Pseudomonas stutzeri NT0128	2648501367	81	223	1388	223	1405	889	0	1541
Ca. Chlorobium antarcticum	2649631612	Pseudomonas stutzeri NT0128	2648501367	81	223	1388	223	1405	889	0	1541
Ca. Chlorobium antarcticum	2877778190	Pseudomonas stutzeri PheN2	2877777284	81	223	1388	221	1403	894	0	1537
Ca. Chlorobium antarcticum	2877780890	Pseudomonas stutzeri PheN2	2877777284	81	223	1388	221	1403	894	0	1536
Ca. Chlorobium antarcticum	2877779562	Pseudomonas stutzeri PheN2	2877777284	81	223	1388	221	1403	894	0	1536
Ca. Chlorobium antarcticum	2877777928	Pseudomonas stutzeri PheN2	2877777284	81	223	1388	221	1403	894	0	1536
Ca. Chlorobium antarcticum	2908468118	Pseudomonas stutzeri SGAir0442	2908464642	81	223	1388	221	1403	889	0	1536
Ca. Chlorobium antarcticum	2908467033	Pseudomonas stutzeri SGAir0442	2908464642	81	223	1388	221	1403	889	0	1536
Ca. Chlorobium antarcticum	2908465333	Pseudomonas stutzeri SGAir0442	2908464642	81	223	1388	221	1403	889	0	1537
Ca. Chlorobium antarcticum	2908466384	Pseudomonas stutzeri SGAir0442	2908464642	81	223	1388	221	1403	889	0	1536
Ca. Chlorobium antarcticum	2596852894	Pseudomonas tuomuerensis CGMCC 1.1365	2596583557	81	214	1388	192	1385	913	0	1419
Ca. Chlorobium antarcticum	2686880509	Psychrobacter alimentarius PAMC 27889	2684623123	81	223	1388	225	1407	900	0	1542
Ca. Chlorobium antarcticum	2686878440	Psychrobacter alimentarius PAMC 27889	2684623123	81	223	1388	225	1407	900	0	1542
Ca. Chlorobium antarcticum	2686880335	Psychrobacter alimentarius PAMC 27889	2684623123	81	223	1388	225	1407	900	0	1542
Ca. Chlorobium antarcticum	2686880504	Psychrobacter alimentarius PAMC 27889	2684623123	81	223	1388	225	1407	900	0	1542
Ca. Chlorobium antarcticum	2686880514	Psychrobacter alimentarius PAMC 27889	2684623123	81	223	1388	225	1407	900	0	1542
Ca. Chlorobium antarcticum	2569883765	Psychrobacter aquaticus CMS 56	2568526406	81	223	1388	197	1379	894	0	1481
Ca. Chlorobium antarcticum	640708231	Psychrobacter arcticus 273-4	637000226	81	223	1388	269	1451	883	0	1610
Ca. Chlorobium antarcticum	640708223	Psychrobacter arcticus 273-4	637000226	81	223	1388	269	1451	883	0	1610
Ca. Chlorobium antarcticum	640708191	Psychrobacter arcticus 273-4	637000226	81	223	1388	269	1451	883	0	1585
Ca. Chlorobium antarcticum	640708236	Psychrobacter arcticus 273-4	637000226	81	223	1388	269	1451	883	0	1610
Ca. Chlorobium antarcticum	2726770902	Psychrobacter cibarius W1	2724679429	81	223	1388	225	1407	894	0	1542
Ca. Chlorobium antarcticum	2774781193	Psychrobacter cryohalolentis FDAARGOS_308	2773857899	81	223	1388	225	1407	900	0	1542
Ca. Chlorobium antarcticum	2774781198	Psychrobacter cryohalolentis FDAARGOS_308	2773857899	81	223	1388	225	1407	900	0	1542
Ca. Chlorobium antarcticum	2774781025	Psychrobacter cryohalolentis FDAARGOS_308	2773857899	81	223	1388	225	1407	900	0	1542
Ca. Chlorobium antarcticum	2774779251	Psychrobacter cryohalolentis FDAARGOS_308	2773857899	81	223	1388	225	1407	900	0	1542
Ca. Chlorobium antarcticum	2774781203	Psychrobacter cryohalolentis FDAARGOS_308	2773857899	81	223	1388	225	1407	900	0	1542
Ca. Chlorobium antarcticum	640714336	Psychrobacter cryohalolentis K5	637000227	81	223	1388	270	1452	900	0	1586
Ca. Chlorobium antarcticum	640714331	Psychrobacter cryohalolentis K5	637000227	81	223	1388	270	1452	900	0	1586
Ca. Chlorobium antarcticum	640714323	Psychrobacter cryohalolentis K5	637000227	81	223	1388	270	1452	900	0	1586
Ca. Chlorobium antarcticum	640714290	Psychrobacter cryohalolentis K5	637000227	81	223	1388	270	1452	900	0	1586
Ca. Chlorobium antarcticum	2771879824	Psychrobacter fozii CECT 5889	2770939577	81	223	1388	225	1407	900	0	1542
Ca. Chlorobium antarcticum	2756720373	Psychrobacter immobilis DSM 7229	2756170258	81	223	1388	225	1407	894	0	1542
Ca. Chlorobium antarcticum	2824374255	Psychrobacter luti CECT 5885	2824371744	81	223	1388	223	1405	889	0	1539
Ca. Chlorobium antarcticum	2579771541	Psychrobacter muriicola 2pS	2576861830	81	223	1388	205	1387	889	0	1421
Ca. Chlorobium antarcticum	2579771531	Psychrobacter muriicola 2pS	2576861830	81	223	1388	205	1387	889	0	1421
Ca. Chlorobium antarcticum	2579771536	Psychrobacter muriicola 2pS	2576861830	81	223	1388	205	1387	889	0	1421
Ca. Chlorobium antarcticum	2579772253	Psychrobacter muriicola 2pS	2576861830	81	223	1388	205	1387	889	0	1420
Ca. Chlorobium antarcticum	2579772423	Psychrobacter muriicola 2pS	2576861830	81	223	1388	205	1387	889	0	1420
Ca. Chlorobium antarcticum	2579774371	Psychrobacter muriicola 2pS	2576861830	81	223	1388	206	1390	880	0	1424
Ca. Chlorobium antarcticum	2850029973	Psychrobacter pasteurii ERS1544373	2850029222	81	222	1388	220	1402	880	0	1535
Ca. Chlorobium antarcticum	2732540510	Psychrobacter phenylpyruvicus NBRC 102152	2731957640	81	222	1388	222	1404	885	0	1539
Ca. Chlorobium antarcticum	2850025196	Psychrobacter phenylpyruvicus NCTC 10526	2850023359	81	222	1388	220	1402	891	0	1535
Ca. Chlorobium antarcticum	2850025191	Psychrobacter phenylpyruvicus NCTC 10526	2850023359	81	222	1388	220	1402	891	0	1535
Ca. Chlorobium antarcticum	2850023549	Psychrobacter phenylpyruvicus NCTC 10526	2850023359	81	222	1388	220	1402	885	0	1535
Ca. Chlorobium antarcticum	2850026145	Psychrobacter phenylpyruvicus NCTC 10526	2850023359	81	222	1388	220	1402	885	0	1535
Ca. Chlorobium antarcticum	2850026140	Psychrobacter phenylpyruvicus NCTC 10526	2850023359	81	222	1388	220	1402	880	0	1535
Ca. Chlorobium antarcticum	2850067096	Psychrobacter piechaudii ERS1544374	2850065688	81	222	1388	221	1403	896	0	1536
Ca. Chlorobium antarcticum	2744567129	Psychrobacter piscatorii LQ58	2744054513	81	223	1388	166	1348	883	0	1483
Ca. Chlorobium antarcticum	2854611790	Psychrobacter proteolyticus HAMBI_2948	2854610812	81	223	1388	223	1405	894	0	1539
Ca. Chlorobium antarcticum	2880963415	Psychrobacter pygoscelis I-STPP5b	2880963411	81	222	1388	222	1405	913	0	1537
Ca. Chlorobium antarcticum	651612305	Psychrobacter sp. 1501	651324094	81	222	1388	213	1395	880	0	1523
Ca. Chlorobium antarcticum	2898727942	Psychrobacter sp. 230	2898725641	81	223	1388	223	1405	894	0	1539
Ca. Chlorobium antarcticum	2850088216	Psychrobacter sp. 4Bb	2850085993	81	223	1388	223	1405	894	0	1539
Ca. Chlorobium antarcticum	2834799943	Psychrobacter sp. 4Dc	2834797060	81	223	1388	223	1405	894	0	1539
Ca. Chlorobium antarcticum	2575913875	Psychrobacter sp. AC24	2574180188	81	223	1388	205	1387	894	0	1421
Ca. Chlorobium antarcticum	2575914182	Psychrobacter sp. AC24	2574180188	81	223	1388	205	1387	894	0	1421
Ca. Chlorobium antarcticum	2575916144	Psychrobacter sp. AC24	2574180188	81	223	1388	205	1387	894	0	1421
Ca. Chlorobium antarcticum	2575916134	Psychrobacter sp. AC24	2574180188	81	223	1388	205	1387	894	0	1421
Ca. Chlorobium antarcticum	2575916139	Psychrobacter sp. AC24	2574180188	81	223	1388	205	1387	894	0	1421
Ca. Chlorobium antarcticum	2575915890	Psychrobacter sp. AC24	2574180188	81	223	1388	205	1387	894	0	1421
Ca. Chlorobium antarcticum	2850089260	Psychrobacter sp. Choline-02u-13	2850088926	81	223	1388	223	1405	894	0	1539
Ca. Chlorobium antarcticum	2850022729	Psychrobacter sp. Choline-02u-9	2850020456	81	223	1388	223	1405	894	0	1539
Ca. Chlorobium antarcticum	2776503561	Psychrobacter sp. Choline-3u-12	2775506959	81	223	1388	225	1407	894	0	1542
Ca. Chlorobium antarcticum	2850077361	Psychrobacter sp. Cmf 22.2	2850076442	81	223	1388	223	1404	878	0	1539
Ca. Chlorobium antarcticum	2850020359	Psychrobacter sp. DAB_AL32B	2850017581	81	223	1388	223	1405	889	0	1539
Ca. Chlorobium antarcticum	2758688590	Psychrobacter sp. DAB_AL43B	2758568032	81	223	1388	225	1407	889	0	1542
Ca. Chlorobium antarcticum	2758686660	Psychrobacter sp. DAB_AL43B	2758568032	81	223	1388	225	1407	889	0	1542
Ca. Chlorobium antarcticum	2758688751	Psychrobacter sp. DAB_AL43B	2758568032	81	223	1388	225	1407	889	0	1542
Ca. Chlorobium antarcticum	2758688756	Psychrobacter sp. DAB_AL43B	2758568032	81	223	1388	225	1407	889	0	1542
Ca. Chlorobium antarcticum	2733982212	Psychrobacter sp. ENNN9_III	2731957962	81	223	1388	225	1406	878	0	1542
Ca. Chlorobium antarcticum	2776507717	Psychrobacter sp. FDAARGOS_221	2775506960	81	222	1388	222	1404	891	0	1537
Ca. Chlorobium antarcticum	2776507867	Psychrobacter sp. FDAARGOS_221	2775506960	81	222	1388	222	1404	891	0	1537
Ca. Chlorobium antarcticum	2776506979	Psychrobacter sp. FDAARGOS_221	2775506960	81	222	1388	222	1404	891	0	1537
Ca. Chlorobium antarcticum	2776506829	Psychrobacter sp. FDAARGOS_221	2775506960	81	222	1388	222	1404	891	0	1537
Ca. Chlorobium antarcticum	2556042951	Psychrobacter sp. G	2554235460	81	223	1388	223	1405	900	0	1540
Ca. Chlorobium antarcticum	2556042780	Psychrobacter sp. G	2554235460	81	223	1388	223	1405	900	0	1540
Ca. Chlorobium antarcticum	2556040943	Psychrobacter sp. G	2554235460	81	223	1388	223	1405	900	0	1540
Ca. Chlorobium antarcticum	2556042946	Psychrobacter sp. G	2554235460	81	223	1388	223	1405	900	0	1540
Ca. Chlorobium antarcticum	2844162508	Psychrobacter sp. JB385	2844160827	81	223	1388	223	1405	900	0	1539
Ca. Chlorobium antarcticum	2570706332	Psychrobacter sp. JCM 18900	2568526656	81	223	1388	197	1379	894	0	1481
Ca. Chlorobium antarcticum	2579561643	Psychrobacter sp. JCM 18901	2576861776	81	223	1388	197	1379	894	0	1481
Ca. Chlorobium antarcticum	2579592471	Psychrobacter sp. JCM 18902	2576861785	81	223	1388	197	1379	894	0	1481
Ca. Chlorobium antarcticum	2579615752	Psychrobacter sp. JCM 18903	2576861790	81	223	1388	197	1379	894	0	1481
Ca. Chlorobium antarcticum	2850053165	Psychrobacter sp. L7	2850052339	81	223	1388	223	1405	883	0	1540
Ca. Chlorobium antarcticum	2617286266	Psychrobacter sp. LV10R520-6	2617270709	81	223	1388	225	1407	900	0	1542
Ca. Chlorobium antarcticum	2617288033	Psychrobacter sp. LV10R520-6	2617270709	81	223	1388	225	1407	900	0	1541
Ca. Chlorobium antarcticum	2617288232	Psychrobacter sp. LV10R520-6	2617270709	81	223	1388	225	1407	883	0	1541
Ca. Chlorobium antarcticum	2617288238	Psychrobacter sp. LV10R520-6	2617270709	81	223	1388	225	1407	878	0	1541
Ca. Chlorobium antarcticum	2898711342	Psychrobacter sp. Marseille-P5312	2898710591	81	223	1388	223	1405	878	0	1540
Ca. Chlorobium antarcticum	2898712263	Psychrobacter sp. Marseille-P5312	2898710591	81	223	1388	223	1405	878	0	1540
Ca. Chlorobium antarcticum	2898711527	Psychrobacter sp. Marseille-P5312	2898710591	81	223	1388	223	1405	878	0	1540
Ca. Chlorobium antarcticum	2854584460	Psychrobacter sp. MES7-P7E	2854581782	81	223	1388	223	1405	894	0	1539
Ca. Chlorobium antarcticum	2841810607	Psychrobacter sp. PAMC27889	2841810607	81	223	1388	223	1405	900	0	1539
Ca. Chlorobium antarcticum	2841810776	Psychrobacter sp. PAMC27889	2841810607	81	223	1388	223	1405	900	0	1539
Ca. Chlorobium antarcticum	2841812691	Psychrobacter sp. PAMC27889	2841810607	81	223	1388	223	1405	900	0	1539
Ca. Chlorobium antarcticum	640598862	Psychrobacter sp. PRwf-1	640427134	81	222	1388	213	1395	885	0	1527
Ca. Chlorobium antarcticum	640600382	Psychrobacter sp. PRwf-1	640427134	81	222	1388	213	1395	885	0	1527
Ca. Chlorobium antarcticum	640600509	Psychrobacter sp. PRwf-1	640427134	81	222	1388	213	1395	885	0	1527
Ca. Chlorobium antarcticum	640600514	Psychrobacter sp. PRwf-1	640427134	81	222	1388	213	1395	885	0	1527
Ca. Chlorobium antarcticum	640600519	Psychrobacter sp. PRwf-1	640427134	81	222	1388	213	1395	885	0	1527
Ca. Chlorobium antarcticum	2834801447	Psychrobacter sp. Rd 27.2	2834799948	81	223	1388	223	1405	883	0	1540
Ca. Chlorobium antarcticum	2776508866	Psychrobacter sp. Sarcosine-3u-12	2775506961	81	223	1388	225	1407	894	0	1542
Ca. Chlorobium antarcticum	2575645107	Psychrobacter sp. TB15	2574180112	81	223	1388	205	1387	878	0	1421
Ca. Chlorobium antarcticum	2575643816	Psychrobacter sp. TB15	2574180112	81	223	1388	205	1387	878	0	1421
Ca. Chlorobium antarcticum	2575714361	Psychrobacter sp. TB2	2574180133	81	223	1388	205	1387	878	0	1421
Ca. Chlorobium antarcticum	2575716234	Psychrobacter sp. TB2	2574180133	81	223	1388	205	1387	878	0	1421
Ca. Chlorobium antarcticum	2579982103	Psychrobacter sp. TB47	2579778551	81	223	1388	205	1387	894	0	1417
Ca. Chlorobium antarcticum	2579983321	Psychrobacter sp. TB47	2579778551	81	223	1388	205	1387	894	0	1417
Ca. Chlorobium antarcticum	2580180760	Psychrobacter sp. TB67	2579778596	81	223	1388	205	1387	894	0	1421
Ca. Chlorobium antarcticum	2580180786	Psychrobacter sp. TB67	2579778596	81	223	1388	205	1387	894	0	1421
Ca. Chlorobium antarcticum	2580180882	Psychrobacter sp. TB67	2579778596	81	223	1388	205	1387	894	0	1421
Ca. Chlorobium antarcticum	2580179977	Psychrobacter sp. TB67	2579778596	81	223	1388	205	1387	894	0	1421
Ca. Chlorobium antarcticum	2580180788	Psychrobacter sp. TB67	2579778596	81	223	1388	205	1387	894	0	1421
Ca. Chlorobium antarcticum	2580180877	Psychrobacter sp. TB67	2579778596	81	223	1388	205	1387	894	0	1421
Ca. Chlorobium antarcticum	2841822209	Psychrobacter sp. YP14	2841821538	81	222	1388	220	1402	885	0	1535
Ca. Chlorobium antarcticum	2841823610	Psychrobacter sp. YP14	2841821538	81	222	1388	220	1402	885	0	1535
Ca. Chlorobium antarcticum	2841823745	Psychrobacter sp. YP14	2841821538	81	222	1388	220	1402	885	0	1535
Ca. Chlorobium antarcticum	2652535685	Psychrobacter urativorans R310.10B	2651869716	81	223	1388	225	1407	900	0	1542
Ca. Chlorobium antarcticum	2652536063	Psychrobacter urativorans R310.10B	2651869716	81	223	1388	225	1407	900	0	1542
Ca. Chlorobium antarcticum	2652536210	Psychrobacter urativorans R310.10B	2651869716	81	223	1388	225	1407	900	0	1542
Ca. Chlorobium antarcticum	2652536225	Psychrobacter urativorans R310.10B	2651869716	81	223	1388	225	1407	900	0	1542
Ca. Chlorobium antarcticum	2652536220	Psychrobacter urativorans R310.10B	2651869716	81	223	1388	225	1407	900	0	1542
Ca. Chlorobium antarcticum	2652536215	Psychrobacter urativorans R310.10B	2651869716	81	223	1388	225	1410	898	0	1545
Ca. Chlorobium antarcticum	2842402345	Rhizobium aethiopicum SEMIA 4029	2842395702	81	239	1388	209	1347	861	0	1481
Ca. Chlorobium antarcticum	2838029094	Rhizobium aethiopicum SEMIA 4074	2838022645	81	239	1388	209	1347	861	0	1481
Ca. Chlorobium antarcticum	2842205328	Rhizobium aethiopicum SEMIA 470	2842198810	81	239	1388	209	1347	861	0	1481
Ca. Chlorobium antarcticum	2643403110	Rhizobium etli R22G	2643221442	81	239	1388	211	1349	872	0	1485
Ca. Chlorobium antarcticum	2738975252	Rhizobium flavum CCTCC AB 2013042	2738541322	81	262	1388	4	1119	863	0	1257
Ca. Chlorobium antarcticum	2861160291	Rhizobium flavum DSM 102134	2861155659	81	239	1388	209	1347	867	0	1483
Ca. Chlorobium antarcticum	2861326356	Rhizobium halotolerans DSM 105041	2861321652	81	239	1388	209	1347	867	0	1483
Ca. Chlorobium antarcticum	2517745595	Rhizobium sp. 42MFCr.1	2517572096	81	239	1388	191	1329	872	0	1362
Ca. Chlorobium antarcticum	2230705792	Rhizobium sp. 57MFTsu3.2	2228664006	81	239	1388	115	1253	872	0	1287
Ca. Chlorobium antarcticum	2824814516	Rhizobium sp. BK049	2824808307	81	239	1388	209	1347	861	0	1481
Ca. Chlorobium antarcticum	2824853694	Rhizobium sp. BK196	2824848109	81	239	1388	209	1347	867	0	1481
Ca. Chlorobium antarcticum	2824993546	Rhizobium sp. BK316	2824987192	81	239	1388	209	1347	867	0	1481
Ca. Chlorobium antarcticum	2825052010	Rhizobium sp. BK377	2825046040	81	239	1388	209	1347	867	0	1481
Ca. Chlorobium antarcticum	2799028899	Rhizobium sp. BK418	2795386128	81	239	1388	211	1349	867	0	1485
Ca. Chlorobium antarcticum	2825154329	Rhizobium sp. BK512	2825147006	81	239	1388	209	1347	867	0	1481
Ca. Chlorobium antarcticum	2825161773	Rhizobium sp. BK527	2825154339	81	239	1388	209	1347	867	0	1481
Ca. Chlorobium antarcticum	2825168225	Rhizobium sp. BK529	2825161782	81	239	1388	209	1347	867	0	1481
Ca. Chlorobium antarcticum	2825294150	Rhizobium sp. BK689	2825286657	81	239	1388	209	1347	867	0	1481
Ca. Chlorobium antarcticum	2825301426	Rhizobium sp. BK700	2825294161	81	239	1388	209	1347	867	0	1481
Ca. Chlorobium antarcticum	2528965134	Rhizobium sp. JGI 0001005-K05 (contamination screened)	2528768104	81	239	1388	191	1329	867	0	1344
Ca. Chlorobium antarcticum	2896540812	Rhizobium sp. Khangiran2	2896540771	81	239	1388	209	1347	867	0	1483
Ca. Chlorobium antarcticum	2896541068	Rhizobium sp. Khangiran2	2896540771	81	239	1388	209	1347	867	0	1483
Ca. Chlorobium antarcticum	2896544413	Rhizobium sp. Khangiran2	2896540771	81	239	1388	209	1347	867	0	1483
Ca. Chlorobium antarcticum	2793325573	Rhizobium sp. L9	2791355260	81	239	1388	211	1349	861	0	1485
Ca. Chlorobium antarcticum	2638275531	Rhizobium sp. NT-26	2636415851	81	239	1388	211	1349	867	0	1487
Ca. Chlorobium antarcticum	2638275782	Rhizobium sp. NT-26	2636415851	81	239	1388	211	1349	867	0	1487
Ca. Chlorobium antarcticum	2638276290	Rhizobium sp. NT-26	2636415851	81	239	1388	211	1349	867	0	1487
Ca. Chlorobium antarcticum	2753823341	Rhizobium sp. NXC14	2751185907	81	239	1388	211	1349	861	0	1485
Ca. Chlorobium antarcticum	2585848108	Rhizobium sp. YR528	2585427594	81	239	1388	115	1253	872	0	1286
Ca. Chlorobium antarcticum	2870864292	Rhizobium viscosum DSM 7307	2870861536	81	239	1388	209	1347	867	0	1481
Ca. Chlorobium antarcticum	2870863900	Rhizobium viscosum DSM 7307	2870861536	81	239	1388	209	1347	867	0	1481
Ca. Chlorobium antarcticum	2870863418	Rhizobium viscosum DSM 7307	2870861536	81	239	1388	209	1347	867	0	1481
Ca. Chlorobium antarcticum	2659376170	Salmonella enterica enterica sv. Weltevreden 74_V_379	2657245535	81	223	1388	223	1405	911	0	1541
Ca. Chlorobium antarcticum	2785510221	Thermomonas haemolytica DSM 13605	2784746806	81	222	1401	228	1426	939	0	1548
Ca. Chlorobium antarcticum	2832199759	Thermomonas haemolytica HAMBI_2467	2832198803	81	222	1401	226	1424	939	0	1545
Ca. Chlorobium antarcticum	2585125612	Thermomonas hydrothermalis DSM 14834	2582581272	81	222	1401	208	1406	933	0	1427
Ca. Chlorobium antarcticum	2728058252	Aliifodinibius sediminis DSM 21194	2724679783	80	2	1505	2	1538	1112	0	1539
Ca. Chlorobium antarcticum	2558308053	Chitinibacter tainanensis DSM 15459	2524614843	80	245	1400	1190	21	863	0	1414
Ca. Chlorobium antarcticum	2870363939	Entomomonas moraniae QZS01	2870361953	80	222	1388	216	1394	870	0	1527
Ca. Chlorobium antarcticum	2870364108	Entomomonas moraniae QZS01	2870361953	80	222	1388	215	1393	865	0	1526
Ca. Chlorobium antarcticum	2870364272	Entomomonas moraniae QZS01	2870361953	80	222	1388	216	1395	870	0	1528
Ca. Chlorobium antarcticum	2884940971	Lysobacter alkalisoli SJ-36	2884940763	80	220	1504	224	1545	961	0	1545
Ca. Chlorobium antarcticum	2898710406	Lysobacter sp. N42	2898705174	80	223	1504	221	1539	933	0	1539
Ca. Chlorobium antarcticum	639103592	Marine gamma proteobacterium sp. HTCC2207	638341247	80	222	1388	217	1400	869	0	1534
Ca. Chlorobium antarcticum	2834665149	Marinobacter guineae M3B	2834661177	80	223	1388	221	1402	872	0	1536
Ca. Chlorobium antarcticum	2573607782	Marinobacter lipolyticus SM19	2571042755	80	222	1388	223	1405	863	0	1539
Ca. Chlorobium antarcticum	2638708931	Marinobacter psychrophilus 20041	2636415955	80	223	1388	227	1409	872	0	1543
Ca. Chlorobium antarcticum	2638709625	Marinobacter psychrophilus 20041	2636415955	80	223	1388	227	1409	872	0	1543
Ca. Chlorobium antarcticum	2638709098	Marinobacter psychrophilus 20041	2636415955	80	223	1388	227	1409	872	0	1543
Ca. Chlorobium antarcticum	2855230977	Marinobacter sp. AC-23	2855226351	80	222	1388	224	1407	863	0	1541
Ca. Chlorobium antarcticum	2841427594	Marinobacter sp. Arc7-DN-1	2841423562	80	223	1388	221	1402	861	0	1536
Ca. Chlorobium antarcticum	2841426948	Marinobacter sp. Arc7-DN-1	2841423562	80	223	1388	221	1402	861	0	1536
Ca. Chlorobium antarcticum	2841426756	Marinobacter sp. Arc7-DN-1	2841423562	80	223	1388	221	1402	861	0	1536
Ca. Chlorobium antarcticum	2616426488	Marinobacter sp. LV10R520-4	2615840649	80	223	1388	237	1419	872	0	1553
Ca. Chlorobium antarcticum	2899453749	Marinobacter sp. LZ-8	2899452337	80	222	1388	224	1406	874	0	1540
Ca. Chlorobium antarcticum	2547105243	Pseudomonas chloritidismutans AW-1	2546826725	80	223	1388	203	1385	867	0	1419
Ca. Chlorobium antarcticum	2570306206	Pseudomonas chloritidismutans AW-1	2568526533	80	223	1388	221	1403	867	0	1538
Ca. Chlorobium antarcticum	2570305966	Pseudomonas chloritidismutans AW-1	2568526533	80	223	1388	221	1403	867	0	1538
Ca. Chlorobium antarcticum	2844661728	Pseudomonas kunmingensis ZKA55	2844658276	80	223	1388	221	1403	872	0	1537
Ca. Chlorobium antarcticum	2844658410	Pseudomonas kunmingensis ZKA55	2844658276	80	223	1388	221	1403	872	0	1537
Ca. Chlorobium antarcticum	2844660046	Pseudomonas kunmingensis ZKA55	2844658276	80	223	1388	221	1403	872	0	1537
Ca. Chlorobium antarcticum	2844659069	Pseudomonas kunmingensis ZKA55	2844658276	80	223	1388	221	1403	872	0	1537
Ca. Chlorobium antarcticum	2508531224	Pseudomonas sp. PK	2508501006	80	223	1388	203	1385	867	0	1419
Ca. Chlorobium antarcticum	2566245239	Pseudomonas stutzeri 28a24	2565956579	80	223	1388	221	1403	878	0	1538
Ca. Chlorobium antarcticum	2566243397	Pseudomonas stutzeri 28a24	2565956579	80	223	1388	221	1403	878	0	1538
Ca. Chlorobium antarcticum	2566243432	Pseudomonas stutzeri 28a24	2565956579	80	223	1388	221	1403	878	0	1538
Ca. Chlorobium antarcticum	2566246081	Pseudomonas stutzeri 28a24	2565956579	80	223	1388	221	1403	878	0	1538
Ca. Chlorobium antarcticum	2518858601	Pseudomonas stutzeri AN10, CCUG 29243	2518645567	80	223	1388	223	1405	872	0	1539
Ca. Chlorobium antarcticum	2518857971	Pseudomonas stutzeri AN10, CCUG 29243	2518645567	80	223	1388	223	1405	872	0	1539
Ca. Chlorobium antarcticum	2518857005	Pseudomonas stutzeri AN10, CCUG 29243	2518645567	80	223	1388	223	1405	872	0	1539
Ca. Chlorobium antarcticum	2518859790	Pseudomonas stutzeri AN10, CCUG 29243	2518645567	80	223	1388	223	1405	872	0	1539
Ca. Chlorobium antarcticum	2547111868	Pseudomonas stutzeri ASK-1	2546826726	80	223	1388	203	1385	872	0	1419
Ca. Chlorobium antarcticum	2715899167	Pseudomonas stutzeri BAL361	2713897178	80	223	1388	223	1405	867	0	1541
Ca. Chlorobium antarcticum	2649422084	Pseudomonas stutzeri ST-9	2648501316	80	223	1388	223	1405	867	0	1541
Ca. Chlorobium antarcticum	2647744926	Pseudomonas xanthomarina S11	2645727965	80	223	1388	223	1405	867	0	1541
Ca. Chlorobium antarcticum	2647744793	Pseudomonas xanthomarina S11	2645727965	80	223	1388	223	1405	867	0	1541
Ca. Chlorobium antarcticum	2576860718	Psychrobacter phenylpyruvicus DSM 7000	2563366723	80	222	1400	1215	21	885	0	1415
Ca. Chlorobium antarcticum	2850026375	Psychrobacter phenylpyruvicus NCTC 10526	2850023359	80	222	1388	220	1399	865	0	1531
Ca. Chlorobium antarcticum	2549931891	Psychrobacter sp. PAMC 21119	2548876808	80	223	1388	205	1388	863	0	1422
Ca. Chlorobium antarcticum	2844173791	Psychrobacter sp. Sarcosine-02u-2	2844171016	80	223	1388	223	1404	861	0	1539
Ca. Chlorobium antarcticum	2885042890	Psychrobacter sp. SHUES1	2885040319	80	223	1388	223	1404	867	0	1539
Ca. Chlorobium antarcticum	2517408291	Rhizobium leguminosarum bv. trifolii SRDI565	2517287029	80	204	1388	157	1329	865	0	1363
Ca. Chlorobium antarcticum	2517408778	Rhizobium leguminosarum bv. trifolii SRDI565	2517287029	80	204	1388	157	1329	865	0	1362
Ca. Chlorobium antarcticum	2517410519	Rhizobium leguminosarum bv. trifolii SRDI565	2517287029	80	204	1388	157	1329	865	0	1362
Ca. Chlorobium antarcticum	2515114661	Rhizobium leguminosarum bv. viciae 248	2515075009	80	204	1388	231	1403	865	0	1436
Ca. Chlorobium antarcticum	2515114088	Rhizobium leguminosarum bv. viciae 248	2515075009	80	204	1388	231	1403	865	0	1436
Ca. Chlorobium antarcticum	2741034964	Rhizobium sp. PP-CC-3A-592	2740891829	80	204	1388	192	1364	876	0	1502
Ca. Chlorobium antarcticum	2741064787	Rhizobium sp. PP-F2F-G20b	2740891835	80	204	1388	192	1364	876	0	1502
Ca. Chlorobium antarcticum	2741008995	Rhizobium sp. PP-WC-2G-219	2740891823	80	204	1388	192	1364	876	0	1502
Ca. Chlorobium antarcticum	2563344405	Salinisphaera shabanensis E1L3A	2562617193	80	10	1401	1	1408	968	0	1524
Ca. Chlorobium antarcticum	2893748798	Salinisphaera sp. G21_0	2893745777	80	5	1401	2	1415	977	0	1536
Ca. Chlorobium antarcticum	2893495715	Unclassified Sphingobacteriales bacterium S19_FULL_No.1_0.9_98	2893493604	80	235	1504	234	1521	900	0	1521
Ca. Chlorobium antarcticum	2831663678	Oceanicoccus sp. KOV_DT_Chl	2831663674	79	10	1388	8	1397	917	0	1530
Ca. Chlorobium antarcticum	2831667818	Oceanicoccus sp. KOV_DT_Chl	2831663674	79	10	1388	8	1398	918	0	1531
Ca. Chlorobium antarcticum	2890950444	Pseudodesulfovibrio sp. JC047	2890947945	79	4	1388	1	1418	959	0	1554
A The Ca. Chlorobium antarcticum 16S rRNA gene (1505 bp length) was aligned to the 16s rRNA Public Isolates IMG database.
B The gene IDs of the 16S rRNA genes from IMG isolate database that matched Ca. Chlorobium antarcticum 16S rRNA gene. The matches are arranged from highest to lowest % identity.
C The closest related species to Ca. Chlorobium antarcticum is highlighted in orange font. Some species have multiple copies of 16S rRNA genes and matches to each of them are shown in the table.

## Sheet: FmoA align - genomes
Query species nameA	Subject IMG Gene IDB	Subject genome nameC	IMG Genome ID	GOLD Analysis Project Type	Identity (%)	Query Start	Query End	Subject Start	Subject End	Bit Score	E-value	Subject Length
Ca. Chlorobium antarcticum	640453749	Chlorobium phaeovibrioides DSM 265	640427130	Isolate	98	1	366	1	366	748	0	366
Ca. Chlorobium antarcticum	2582907234	Composite genome from Trout Bog Hypolimnion pan-assembly TBhypo.metabat.111	2582580651	MAG	97	1	366	1	366	737	0	366
Ca. Chlorobium antarcticum	2582853174	Composite genome from Trout Bog Epilimnion pan-assembly TBepi.metabat.211	2582580622	MAG	97	1	366	1	366	737	0	366
Ca. Chlorobium antarcticum	2739439863	Chlorobi bacterium JGI_MCM14TBH012 (contamination screened)	2739367544	SAG	97	1	366	1	366	737	0	366
Ca. Chlorobium antarcticum	2883977507	Chlorobium sp. N1	2883976897	Isolate	97	1	366	1	366	735	0	366
Ca. Chlorobium antarcticum	637769538	Pelodictyon luteolum DSM 273	637000205	Isolate	97	1	366	1	366	736	0	366
Ca. Chlorobium antarcticum	2739543490	Chlorobi bacterium JGI_MCM14TBH044 (contamination screened)	2739367637	SAG	97	1	366	1	366	737	0	366
Ca. Chlorobium antarcticum	2758574397	Unclassified chlorobium sp. NF	2758568002	Isolate	97	1	366	1	366	735	0	366
Ca. Chlorobium antarcticum	2595253599	Composite genome from Trout Bog Hypolimnion pan-assembly TBhypo.metabat.3520.v2	2593339184	MAG	96	1	366	1	366	733	0	366
Ca. Chlorobium antarcticum	2891045861	Chlorobium sp. BLA1	2891045655	Isolate	96	1	366	1	366	731	0	366
Ca. Chlorobium antarcticum	639205702	Chlorobium ferrooxidans DSM 13031	638341060	Isolate	96	1	366	1	366	731	0	366
Ca. Chlorobium antarcticum	642727307	Pelodictyon phaeoclathratiforme BU-1	642555146	Isolate	96	1	366	1	366	730	0	366
Ca. Chlorobium antarcticum	2582858582	Composite genome from Trout Bog Epilimnion pan-assembly TBepi.metabat.2493	2582580625	MAG	96	1	366	1	366	733	0	366
Ca. Chlorobium antarcticum	639766470	Chlorobium phaeobacteroides DSM 266	639633020	Isolate	94	1	366	1	366	721	0	366
Ca. Chlorobium antarcticum	642669309	Chlorobium limicola DSM 245	642555121	Isolate	93	1	366	1	366	715	0	366
Ca. Chlorobium antarcticum	2728698970	Chlorobium limicola Frasassi	2728368987	Isolate	93	1	366	1	366	715	0	366
Ca. Chlorobium antarcticum	637773866	Chlorobium chlorochromatii CaD3	637000072	Isolate	93	1	366	1	366	715	0	366
Ca. Chlorobium antarcticum	642720233	Chlorobaculum parvum DSM 263	642555120	Isolate	89	1	366	1	365	679	0	365
Ca. Chlorobium antarcticum	2752554252	Chlorobiales bacterium Clorobi_01	2751185570	MAG	87	1	366	1	366	680	0	366
Ca. Chlorobium antarcticum	2511496164	Chlorobaculum limnaeum RK-j-1	2511231051	Isolate	87	1	366	1	366	680	0	366
Ca. Chlorobium antarcticum	2501895067	Chlorobaculum limnaeum DSM 1677	2501846309	Isolate	87	1	366	1	366	680	0	366
Ca. Chlorobium antarcticum	2882763337	Chlorobaculum sp. 24CR	2882762944	Isolate	87	1	366	1	366	677	0	366
Ca. Chlorobium antarcticum	637116445	Chlorobaculum tepidum TLS	637000073	Isolate	86	1	366	1	366	676	0	366
Ca. Chlorobium antarcticum	642725583	Prosthecochloris aestuarii SK413, DSM 271	642555149	Isolate	83	1	366	1	367	650	0	367
Ca. Chlorobium antarcticum	2833419698	Prosthecochloris sp. ZM	2833419001	Isolate	83	1	366	1	367	650	0	367
Ca. Chlorobium antarcticum	2752994429	Prosthecochloris sp. HL-GSB HL-130-GSB	2751185712	Isolate	83	1	366	1	367	645	0	367
Ca. Chlorobium antarcticum	2723113863	Prosthecochloris sp. CIB 2401	2721755577	Isolate	82	1	366	1	367	644	0	367
Ca. Chlorobium antarcticum	2758494862	Prosthecochloris sp. GSB1	2757320899	Isolate	81	1	366	1	367	619	0	367
Ca. Chlorobium antarcticum	2839411889	Prosthecochloris marina V1	2839410141	Isolate	81	1	366	1	367	617	0	367
Ca. Chlorobium antarcticum	642683349	Chlorobium phaeobacteroides BS1	642555122	Isolate	81	1	366	1	367	634	0	367
Ca. Chlorobium antarcticum	2833569745	Prosthecochloris sp. ZM_2	2833569056	Isolate	81	1	366	1	367	632	0	367
Ca. Chlorobium antarcticum	642716588	Chloroherpeton thalassium ATCC 35110	642555123	Isolate	68	1	366	1	370	549	0	370
Ca. Chlorobium antarcticum	2772374253	Chlorobium sp. GBChlB	2772190655	Isolate	68	1	366	1	368	532	0	368
Ca. Chlorobium antarcticum	2512361070	Chloracidobacterium thermophilum B	2512047033	Isolate	39	14	365	8	365	251	7e-77	365
Ca. Chlorobium antarcticum	2691106187	Chloracidobacterium thermophilum OC1	2690315793	Isolate	38	14	365	8	365	250	1e-76	365
A The Ca. Chlorobium antarcticum bacteriochlorophyll A protein (FmoA, 366 aa length) was aligned to the proteins in the IMG genome database, which included isolates, MAGs (metagenome-assembled genomes) and SAGs (single-amplified genomes).
B The gene IDs of the 16S rRNA genes from IMG isolate database that matched Ca. Chlorobium antarcticum 16S rRNA gene. The matches are arranged from highest to lowest % identity.
C The closest related species to Ca. Chlorobium antarcticum is highlighted in orange font.

## Sheet: IMG databases
16S rRNA align - metagenomes
IMG database	16S rRNA Public Assembled Metagenomes
Accessed on	2021-03-14
e-value	1e-05
Max no. of hits	500
16S rRNA align - genomes
IMG database	16s rRNA Public Isolates
Accessed on	2021-03-30
e-value	1e-05
Max no. of hits	500
FmoA align - genomes
IMG database	All genomes (includes isolates, MAGs, SAGs)
Accessed on	2021-03-14
e-value	1e-05
Max no. of hits	500
